# Supplementary material for: Ammonium fertilization increases the susceptibility to fungal leaf and root pathogens in winter wheat
Source: Front Plant Sci. 2022 Sep 9;13:946584. doi: 10.3389/fpls.2022.946584 (PMC9500508; doi:10.3389/fpls.2022.946584)
Supplement: Supplementary file 1 [file Table_2.XLSX]

## Sheet: Fungal_dataset
	AMM1	AMM2	AMM3	KAL1	KAL4	KAL5	NIT4	NIT5	NIT6	OHN1	OHN2	OHN3	Kingdom	Phylum	Class	Order	Family	Genus	Species
16f5043a68abc055b081afee068a6d4f	6580	7584	6982	7462	3357	3728	3411	3296	2662	7392	10728	6394	Fungi	Ascomycota	Sordariomycetes	unidentified	unidentified	unidentified	unidentified
16507e25d999abc59217324eaa106635	3389	3027	2903	3433	2123	1255	1135	3877	2849	2559	4210	2305	Fungi	Ascomycota	Sordariomycetes	Hypocreales	Nectriaceae	unidentified	unidentified
074318de01cbe31be377e2d16d882567	2581	1721	1987	2531	1793	1207	1202	4773	3250	2288	5129	2239	Fungi	Ascomycota	Sordariomycetes	Hypocreales	Nectriaceae	Fusarium	unidentified
cea7d7991895e6c800f976542c79ccbf	3352	134	10752	176	66	48	0	0	0	1175	635	2370	Fungi	Ascomycota	Leotiomycetes	Erysiphales	Erysiphaceae	Blumeria	unidentified
0af8b453f62e5f58323268e491752beb	4075	183	12770	186	92	60	0	13	36	1580	790	2864	Fungi	Ascomycota	Leotiomycetes	Erysiphales	Erysiphaceae	Blumeria	unidentified
11da3d71cb2a5aaaad681d1d25166bf4	657	861	920	1027	446	470	540	330	0	831	1657	959	Fungi	Ascomycota	unidentified	unidentified	unidentified	unidentified	unidentified
8f494d0053e48501ab5f4191e331b683	2167	2737	1567	1618	1277	694	1310	2124	2052	1039	2851	1901	Fungi	Ascomycota	Dothideomycetes	Capnodiales	Cladosporiaceae	Cladosporium	unidentified
494d62d63b496d8bc898b026a9f79170	1259	3055	2048	2476	793	933	1278	497	540	1849	2670	2096	Fungi	Ascomycota	Leotiomycetes	Helotiales	unidentified	unidentified	unidentified
c808b126c448023443afd6f1f5fc1ca8	1088	1330	2327	2029	645	635	829	899	813	1309	1640	1358	Fungi	Ascomycota	Dothideomycetes	Pleosporales	Didymellaceae	unidentified	unidentified
2f49610f9b40af4a510bd644f3efad4b	1270	1506	1384	1655	991	722	902	1429	979	1198	2392	1907	Fungi	Ascomycota	Sordariomycetes	Hypocreales	Nectriaceae	Fusarium	Fusarium_oxysporum
0f32e6b28d562a3daeef28f6200483f9	1158	1891	2042	1624	713	1142	659	470	537	1266	3770	1594	Fungi	Ascomycota	unidentified	unidentified	unidentified	unidentified	unidentified
e37bd313f5514a0b5a9e228941194191	1348	1314	1456	2240	1202	705	620	595	590	1353	3253	1629	Fungi	Ascomycota	Sordariomycetes	unidentified	unidentified	unidentified	unidentified
60e963dba5db57043967a6f95c443af4	1475	1588	1469	2119	558	685	525	908	958	979	2655	1191	Fungi	Ascomycota	Dothideomycetes	Pleosporales	Didymellaceae	unidentified	unidentified
4bae7f706ade1e70843137d6102e0a27	0	0	0	0	18	0	0	0	0	0	24	0	Fungi	Ascomycota	Laboulbeniomycetes	Pyxidiophorales	Pyxidiophoraceae	Pyxidiophora	Pyxidiophora_arvernensis
110ada214724d25c20efcf59093d42a7	15	18	24	39	14	11	14	11	0	26	50	27	Fungi	Ascomycota	Leotiomycetes	unidentified	unidentified	unidentified	unidentified
d51de02d219ccb5e7fe15784730ddf8b	493	622	631	601	260	299	289	563	711	399	1681	489	Fungi	Ascomycota	Sordariomycetes	Glomerellales	Plectosphaerellaceae	Plectosphaerella	unidentified
fc4bc4aecfe7c9a93a7c3c86b806f66e	704	882	774	929	412	425	404	300	190	649	912	903	Fungi	Ascomycota	Sordariomycetes	Hypocreales	Nectriaceae	Fusarium	unidentified
6e891e273444e31f0d375234b956f138	1237	491	508	842	372	824	699	436	2163	275	918	771	Fungi	Ascomycota	Sordariomycetes	Sordariales	unidentified	unidentified	unidentified
d958279300f6f6cdb703739ba748daa9	735	41	292	69	111	94	22	18	104	61	65	19	Fungi	Ascomycota	Sordariomycetes	Sordariales	unidentified	unidentified	unidentified
95d060026bad31230be05ef7ff54f433	2915	608	495	788	347	287	238	347	204	555	646	1176	Fungi	Ascomycota	Dothideomycetes	Pleosporales	Thyridariaceae	unidentified	unidentified
b1581591b76e5cceda29f14c8bcfc8b6	603	687	925	526	396	385	314	238	207	572	1035	647	Fungi	Ascomycota	unidentified	unidentified	unidentified	unidentified	unidentified
6df3ecfacb270ce46ef5d188ef5d2bc2	427	631	524	532	224	195	233	231	193	1098	662	433	Fungi	Ascomycota	Dothideomycetes	Pleosporales	unidentified	unidentified	unidentified
a56869b309d4a22f21a67f65da5117a5	281	351	438	479	221	157	137	147	90	308	544	313	Fungi	Ascomycota	Sordariomycetes	Hypocreales	Nectriaceae	Fusarium	unidentified
3833f7f1663a4ef32bd022e11f3ffbe6	1498	558	862	672	356	398	111	56	313	530	470	286	Fungi	Ascomycota	unidentified	unidentified	unidentified	unidentified	unidentified
16c79ebf178142296f6fcb95ac9a7841	530	613	528	1092	247	215	280	217	127	446	805	511	Fungi	Ascomycota	Eurotiomycetes	Chaetothyriales	Herpotrichiellaceae	Exophiala	unidentified
7dd4b48a6531bd350083e3ebe5871934	537	440	354	368	392	260	215	831	390	186	739	525	Fungi	Ascomycota	Sordariomycetes	Hypocreales	Nectriaceae	unidentified	unidentified
c8b5be618eafc5c3ddc1235b0f31bb3c	695	31	1838	27	0	14	0	0	6	288	157	484	Fungi	Ascomycota	Leotiomycetes	Erysiphales	Erysiphaceae	Blumeria	unidentified
8ab85875fab65b85e395584c6f96c850	79	94	91	90	34	52	51	39	21	125	152	96	Fungi	Ascomycota	Sordariomycetes	Sordariales	Chaetomiaceae	Dichotomopilus	unidentified
312bdcf778e57c080bdebae8b60cbe68	409	394	402	466	862	81	91	123	112	262	477	333	Fungi	Mucoromycota	Mucoromycetes	Mucorales	Mucoraceae	Mucor	Mucor_circinelloides
49668473a513aed86ba845e0e421c932	379	428	468	333	319	268	176	116	117	348	473	962	Fungi	Ascomycota	unidentified	unidentified	unidentified	unidentified	unidentified
46a5d776bb6618a2008a582485a932f2	387	361	400	325	166	196	129	85	73	270	419	311	Fungi	Ascomycota	Sordariomycetes	Hypocreales	Nectriaceae	Fusicolla	unidentified
d5cf442473073804232565370f507bc4	1314	257	265	381	151	164	143	178	93	288	423	312	Fungi	Ascomycota	Leotiomycetes	unidentified	unidentified	unidentified	unidentified
63ef13e36266ed4b0d7f29ebfb4a4c2e	0	0	256	0	0	0	0	0	0	0	155	235	Fungi	unidentified	unidentified	unidentified	unidentified	unidentified	unidentified
5dad5efec2aa6560dee6f2fce7b3e3f3	330	306	264	422	217	158	113	100	101	270	792	430	Fungi	Basidiomycota	Tremellomycetes	Cystofilobasidiales	Mrakiaceae	unidentified	unidentified
b64ac50768acce9c52faaa632c42404b	3900	0	50	180	21	0	40	0	0	42	0	66	Fungi	Ascomycota	Eurotiomycetes	Eurotiales	Aspergillaceae	Penicillium	unidentified
3c625bd53d73530a63c8f59696b58023	215	245	244	387	105	87	128	132	65	295	263	274	Fungi	Ascomycota	Sordariomycetes	Coniochaetales	Coniochaetaceae	unidentified	unidentified
9f2a554c014583c6978d8eaa9d7a0e98	153	305	317	334	240	180	144	226	83	308	474	365	Fungi	Ascomycota	Sordariomycetes	Hypocreales	Bionectriaceae	Clonostachys	unidentified
afbeea3965188d3c68e3ca070ea81f03	173	523	286	116	669	55	69	69	61	206	422	577	Fungi	Ascomycota	Sordariomycetes	unidentified	unidentified	unidentified	unidentified
6f3430feef3f8b774d351dcbc64442ca	432	0	1465	0	0	0	0	0	0	165	0	329	Fungi	Ascomycota	Leotiomycetes	Erysiphales	Erysiphaceae	Blumeria	unidentified
33e3b47267123c0de6fda0af7aa94565	0	0	0	552	0	0	0	0	0	0	732	0	Fungi	Ascomycota	Sordariomycetes	unidentified	unidentified	unidentified	unidentified
87db4e4232fe081d0deb3c93de132354	2580	130	183	28	39	0	0	54	9	205	71	0	Fungi	Ascomycota	Dothideomycetes	Pleosporales	Sporormiaceae	unidentified	unidentified
7d0537849768e8ca930847a202285bff	21	81	32	47	0	0	38	0	0	26	0	0	Fungi	Ascomycota	Laboulbeniomycetes	Pyxidiophorales	Pyxidiophoraceae	Pyxidiophora	Pyxidiophora_arvernensis
fc10244d4999ee37b5bbebf402dee7ad	171	154	492	202	73	93	75	47	103	174	695	208	Fungi	Ascomycota	Leotiomycetes	Helotiales	unidentified	unidentified	unidentified
571b45f1cb9a63275d2811554a598710	0	350	0	48	103	39	2	0	0	0	17	17	Fungi	Ascomycota	Dothideomycetes	Pleosporales	Sporormiaceae	Preussia	unidentified
74a62cc889c104b325f1b373f16d34e0	178	235	242	270	166	155	134	113	77	215	326	327	Fungi	Ascomycota	Eurotiomycetes	Chaetothyriales	Herpotrichiellaceae	Exophiala	unidentified
052cffb8493c498816ea4ac766ff7834	418	583	149	147	193	0	129	42	0	174	727	312	Fungi	Basidiomycota	Tremellomycetes	Trichosporonales	Trichosporonaceae	Apiotrichum	unidentified
000f83dc2526c686c48db59ebc59610a	190	362	291	386	28	26	33	18	9	193	365	410	Fungi	Ascomycota	Leotiomycetes	unidentified	unidentified	unidentified	unidentified
8179de998cf0fb829e20fb29714db1b8	192	207	248	214	79	107	95	328	175	167	443	199	Fungi	Ascomycota	Sordariomycetes	unidentified	unidentified	unidentified	unidentified
abe91739c80e25a355ff59c61da86fb2	154	261	330	160	60	64	69	29	32	120	282	238	Fungi	Ascomycota	unidentified	unidentified	unidentified	unidentified	unidentified
b1d2ac5e1bec090307b0235dfab9d325	1397	45	54	27	47	45	0	0	15	0	66	20	Fungi	Ascomycota	Leotiomycetes	Helotiales	unidentified	unidentified	unidentified
2b6b3c7e052460e6ac1fb0844f47b262	316	91	118	154	162	60	78	347	476	83	383	120	Fungi	Ascomycota	Sordariomycetes	Glomerellales	Plectosphaerellaceae	unidentified	unidentified
daa44f2cd810254255dfee2302da89bb	134	231	179	210	109	124	132	79	55	183	440	244	Fungi	Ascomycota	Sordariomycetes	Hypocreales	Nectriaceae	unidentified	unidentified
c550db52c808595e6e88306aca7cc352	266	232	192	130	140	141	80	61	44	100	450	186	Fungi	Ascomycota	Sordariomycetes	Hypocreales	Nectriaceae	unidentified	unidentified
975ab24da4e7afbcfa01c4dc19b73e84	190	122	759	86	26	41	83	31	45	69	474	256	Fungi	Ascomycota	Dothideomycetes	Pleosporales	Phaeosphaeriaceae	Paraphoma	unidentified
5f2879029bc3135b97acf6965a0c1d00	149	189	133	98	82	47	65	51	38	102	234	121	Fungi	Ascomycota	Dothideomycetes	Pleosporales	unidentified	unidentified	unidentified
b81ed0f459ee3e92a22453aa6f4f1630	138	192	206	235	184	115	89	65	70	90	387	163	Fungi	Ascomycota	Sordariomycetes	Sordariales	Chaetomiaceae	unidentified	unidentified
e4ae4b2c7e2eeb8e54a89964e1a8526c	137	81	84	113	90	55	73	382	88	94	182	71	Fungi	Ascomycota	Sordariomycetes	Hypocreales	Nectriaceae	unidentified	unidentified
bad75c898c0d5deb8666220cadfce504	123	107	157	205	92	78	188	54	52	109	335	207	Fungi	Ascomycota	Sordariomycetes	Hypocreales	unidentified	unidentified	unidentified
816c688eaeb3d4b4d21be4439ce2f422	253	239	180	207	45	25	40	45	14	168	339	109	Fungi	Mucoromycota	Mucoromycetes	Mucorales	Mucoraceae	Mucor	unidentified
459c4f378423077728536a2630478436	130	105	170	176	61	96	90	384	68	100	364	106	Fungi	Ascomycota	Sordariomycetes	Xylariales	unidentified	unidentified	unidentified
5add0ccf8e79caed3e44c8f229153a78	147	200	119	222	66	99	36	56	35	112	162	45	Fungi	Ascomycota	Sordariomycetes	Hypocreales	Nectriaceae	unidentified	unidentified
258ba7029fccb1cb3f775330d82ba11d	58	151	119	119	25	50	31	17	21	63	224	69	Fungi	Basidiomycota	Microbotryomycetes	Leucosporidiales	Leucosporidiaceae	Leucosporidium	unidentified
bb8873f3974a42b4221f65f4aeff7147	314	136	62	159	36	55	20	48	16	61	151	87	Fungi	Ascomycota	Dothideomycetes	Pleosporales	Periconiaceae	Periconia	unidentified
b76097c5006fefaa037d1cf43b54a484	178	154	121	159	135	64	34	53	40	88	190	129	Fungi	Mucoromycota	Mucoromycetes	Mucorales	Mucoraceae	Mucor	Mucor_circinelloides
f1982bfca8cc17c5eeb5b9f4bb994ce1	67	126	114	235	76	76	86	0	91	116	346	150	Fungi	Ascomycota	Sordariomycetes	Hypocreales	Nectriaceae	unidentified	unidentified
00f6edc65f587c2a399b0e986698988f	5	0	0	0	1904	0	11	0	0	0	0	0	Fungi	Ascomycota	Dothideomycetes	Pleosporales	unidentified	unidentified	unidentified
af6a3aeb8dfcc6af19ab183583785e9d	0	121	153	0	0	0	0	0	0	0	550	134	Fungi	Ascomycota	unidentified	unidentified	unidentified	unidentified	unidentified
68635bcf9859beb3f85374d9866efaab	74	148	140	128	189	58	37	60	33	173	167	136	Fungi	Ascomycota	Sordariomycetes	Hypocreales	unidentified	unidentified	unidentified
ee47b326c380e50faa878032111391d2	151	131	114	143	64	81	86	161	72	104	103	94	Fungi	Ascomycota	Sordariomycetes	Hypocreales	Nectriaceae	unidentified	unidentified
f38876e2279cedcba53308fd8afd7bf3	154	147	86	134	293	0	36	0	27	81	144	91	Fungi	Mucoromycota	Mucoromycetes	Mucorales	Mucoraceae	Mucor	Mucor_circinelloides
ae7e04ae226700cdf97ae271e8a1ec22	22	52	58	231	17	14	32	16	0	83	65	39	Fungi	Ascomycota	Sordariomycetes	Sordariales	Chaetomiaceae	Dichotomopilus	unidentified
c01154733f9c624be707d06b0be8ed59	106	182	66	106	62	70	60	51	36	117	223	112	Fungi	Ascomycota	Dothideomycetes	Pleosporales	Torulaceae	unidentified	unidentified
cf12c4402f6a5acd79ea99b28a2f475d	88	33	25	70	32	15	21	41	16	48	78	49	Fungi	Basidiomycota	Agaricomycetes	Agaricales	Psathyrellaceae	Psathyrella	unidentified
e64fcb036237d12ba4e7ddaecdf99808	0	93	80	0	0	0	13	0	0	0	0	482	Fungi	unidentified	unidentified	unidentified	unidentified	unidentified	unidentified
7cba33761a15fdb4042dc5c266123c38	184	119	197	0	298	115	298	207	71	0	81	13	Fungi	Ascomycota	Sordariomycetes	Sordariales	unidentified	unidentified	unidentified
d1e6e86f82f45998caa3b0b8f30cf3a3	0	253	116	217	69	54	71	37	16	139	205	73	Fungi	Ascomycota	Pezizomycetes	Pezizales	unidentified	unidentified	unidentified
b21e109062fe9c7494d95d37025c6960	249	173	215	0	0	0	0	0	0	169	262	284	Fungi	Basidiomycota	Tremellomycetes	Trichosporonales	Trichosporonaceae	Apiotrichum	unidentified
820a5201199f977c5bca64012cf51bba	100	71	110	68	51	58	35	25	24	70	123	79	Fungi	Ascomycota	Sordariomycetes	Microascales	unidentified	unidentified	unidentified
72ae5bdfc00a4be3b91b8a21803845d0	79	88	105	108	18	40	33	16	13	67	187	43	Fungi	Ascomycota	Dothideomycetes	Pleosporales	Torulaceae	Torula	unidentified
891d221abe2899b5261f23cc451e56dc	94	119	96	137	47	44	88	50	17	70	281	89	Fungi	Basidiomycota	Microbotryomycetes	Leucosporidiales	Leucosporidiaceae	unidentified	unidentified
9e305b426c5edf5970557c7c582aeafe	56	87	58	78	34	35	16	38	0	128	89	59	Fungi	Ascomycota	Laboulbeniomycetes	Pyxidiophorales	unidentified	unidentified	unidentified
fd58cdeee51da6cc18cc47b1eee54fb9	191	227	211	0	0	0	0	0	0	238	0	199	Fungi	Ascomycota	Sordariomycetes	unidentified	unidentified	unidentified	unidentified
c05bd0cca30d1fef60cd0b7916e7dfd4	64	61	57	390	31	27	26	14	0	47	161	59	Fungi	Basidiomycota	Tremellomycetes	Trichosporonales	Trichosporonaceae	Apiotrichum	unidentified
8ae46b55cd8d0e76ec5720b7b121c0c9	96	117	60	72	38	30	8	66	17	101	332	199	Fungi	Ascomycota	Sordariomycetes	Sordariales	Sordariaceae	unidentified	unidentified
0af2a38c11a69f562f2ce36f4d72397d	442	136	477	42	0	0	0	0	0	25	77	39	Fungi	Basidiomycota	Agaricomycetes	Agaricales	Psathyrellaceae	unidentified	unidentified
ce1a3ff339c312483435bb6b8a737f46	81	96	108	173	106	38	79	52	36	62	179	94	Fungi	Ascomycota	Sordariomycetes	Hypocreales	Nectriaceae	Fusarium	unidentified
78b52cd658eeb5a14d18c57ffb3f5d4a	40	87	76	151	41	65	121	61	89	61	221	53	Fungi	Ascomycota	Sordariomycetes	Sordariales	Lasiosphaeriaceae	unidentified	unidentified
98356410e0e165fb69701cab2b26396c	133	89	120	123	50	59	57	79	0	110	153	108	Fungi	Ascomycota	Sordariomycetes	Hypocreales	unidentified	unidentified	unidentified
88c2d6703cb5068ae20050d78720c550	0	408	70	53	29	11	0	13	11	59	135	167	Fungi	Mucoromycota	Mucoromycetes	Mucorales	Mucoraceae	Mucor	unidentified
0a192e58e4e6e15c8e8b8eecdefd37c8	81	127	100	147	35	60	53	47	31	103	148	93	Fungi	Ascomycota	Sordariomycetes	Hypocreales	unidentified	unidentified	unidentified
c154b8360e269fd36cfa54cb37cacf39	67	160	97	126	41	88	40	29	27	122	153	59	Fungi	Ascomycota	Leotiomycetes	Helotiales	Sclerotiniaceae	unidentified	unidentified
64f6130c47090ad51ae177ce763c35c5	69	86	196	132	0	38	100	0	0	108	90	98	Fungi	Ascomycota	Leotiomycetes	unidentified	unidentified	unidentified	unidentified
ff26605477c80287a19d65a79b0dac8f	80	97	68	82	64	59	72	83	55	80	144	36	Fungi	Ascomycota	Sordariomycetes	Hypocreales	Bionectriaceae	Clonostachys	unidentified
dd8860033de80c1b25182ba962dd69eb	0	795	0	0	0	10	0	0	0	13	99	62	Fungi	unidentified	unidentified	unidentified	unidentified	unidentified	unidentified
c7ce8f822335b0c6cc6ff0d1d7b401cd	197	111	61	0	9	0	0	0	0	49	87	103	Fungi	unidentified	unidentified	unidentified	unidentified	unidentified	unidentified
a9d0c640d6355a1f71cf21890579df9c	104	105	59	77	41	24	134	41	31	95	99	71	Fungi	Ascomycota	Dothideomycetes	Pleosporales	unidentified	unidentified	unidentified
7a07425bec9422aac20121f94389a5c9	0	138	0	209	114	0	124	0	0	79	197	132	Fungi	Ascomycota	Dothideomycetes	Capnodiales	unidentified	unidentified	unidentified
bbaab17a53163a8ec87971504ad8a492	61	168	89	100	38	48	33	42	15	96	85	60	Fungi	Ascomycota	Sordariomycetes	Microascales	Ceratocystidaceae	unidentified	unidentified
494c9bf2fd12894b46223e01b79d188f	94	46	89	185	63	51	0	0	54	77	100	63	Fungi	Ascomycota	Sordariomycetes	Hypocreales	unidentified	unidentified	unidentified
c107c2a3906941e454e244af432c7089	46	61	79	124	26	16	26	0	0	38	38	50	Fungi	Ascomycota	Leotiomycetes	unidentified	unidentified	unidentified	unidentified
1764cdae0caf47f08508dc5281751cf7	0	50	0	105	0	0	0	0	0	104	97	94	Fungi	Ascomycota	Sordariomycetes	Hypocreales	unidentified	unidentified	unidentified
b82c367d16abba01b3d335a7c719f361	120	134	96	47	14	14	33	8	7	43	129	117	Fungi	Basidiomycota	Tremellomycetes	Filobasidiales	Filobasidiaceae	Naganishia	unidentified
9f898051de557fa05c9156810d58fcbb	0	59	24	29	0	0	0	0	0	99	120	57	Fungi	unidentified	unidentified	unidentified	unidentified	unidentified	unidentified
20e05889ccf458b41e4fa3eef8e619c1	77	77	78	100	34	48	30	26	19	59	101	88	Fungi	Ascomycota	Sordariomycetes	Hypocreales	Hypocreales_fam_Incertae_sedis	Emericellopsis	unidentified
728e6b16e20ed6de07efcb54a0661fb0	72	38	132	49	38	38	159	86	20	92	34	0	Fungi	Ascomycota	Sordariomycetes	Sordariales	unidentified	unidentified	unidentified
cbbdf25dcfa516b5aa460cd0e972de07	193	37	25	55	32	25	46	120	188	28	52	56	Fungi	Ascomycota	Sordariomycetes	Hypocreales	Stachybotryaceae	unidentified	unidentified
268c8fdf51f5008bcc571d356efbe970	0	276	282	0	0	33	29	68	16	0	107	0	Fungi	Ascomycota	Sordariomycetes	Sordariales	Chaetomiaceae	Chaetomium	unidentified
e083f0d316804d25db9cff70b5a9ebec	37	37	324	36	22	21	40	43	18	45	56	50	Fungi	Ascomycota	Dothideomycetes	Pleosporales	unidentified	unidentified	unidentified
9f47a55a87baeb6526fb807917a96b6f	62	37	53	79	24	32	0	24	17	41	94	76	Fungi	Ascomycota	Sordariomycetes	Glomerellales	Plectosphaerellaceae	Plectosphaerella	unidentified
66c34b0dc3ca9fe6e627f68fec39c681	87	85	84	95	60	47	87	16	15	43	69	61	Fungi	Ascomycota	Sordariomycetes	Sordariales	Chaetomiaceae	unidentified	unidentified
94e88d78b0dbcc6acc093f197ceb526e	132	76	43	42	53	22	431	0	0	54	0	0	Fungi	Basidiomycota	Tremellomycetes	Trichosporonales	Trichosporonaceae	Apiotrichum	unidentified
0f300ba1855acf99d3cbc05109d3b65a	0	0	0	215	0	0	0	0	0	0	241	0	Fungi	Ascomycota	Leotiomycetes	Helotiales	unidentified	unidentified	unidentified
6cca7483ac74a910aacecbbc0ea73b53	0	0	0	0	10	0	0	0	0	0	866	0	Fungi	Ascomycota	Sordariomycetes	Hypocreales	unidentified	unidentified	unidentified
5a4b50997a3c43b796c4bd1742b85db1	68	37	44	72	20	14	30	6	9	40	70	57	Fungi	Ascomycota	Leotiomycetes	Thelebolales	Pseudeurotiaceae	unidentified	unidentified
11a5cb681e3616857ac80fb51d610feb	14	42	143	154	0	0	19	0	0	92	47	39	Fungi	Ascomycota	Sordariomycetes	Sordariales	Lasiosphaeriaceae	unidentified	unidentified
63681337a6a19040385c51e28dfdef18	0	0	0	131	0	0	0	47	0	0	207	0	Fungi	Ascomycota	Sordariomycetes	Sordariales	Lasiosphaeriaceae	unidentified	unidentified
c979bb6c9c6ab7f4895a6ab028ff6278	23	44	37	84	116	29	28	0	15	52	64	33	Fungi	Ascomycota	Sordariomycetes	Sordariales	Chaetomiaceae	unidentified	unidentified
79141cbe163ec58a5d701b527dddd4b3	73	81	39	82	25	0	35	26	0	40	59	71	Fungi	Ascomycota	Sordariomycetes	unidentified	unidentified	unidentified	unidentified
76ca8aa5910fe86bdab253e62f16a907	37	44	55	64	26	25	30	9	12	65	93	35	Fungi	Ascomycota	Dothideomycetes	Pleosporales	Didymosphaeriaceae	unidentified	unidentified
0d018ac6d46996d288fff65d69836235	31	51	46	47	25	32	13	0	25	28	96	49	Fungi	Ascomycota	Sordariomycetes	Microascales	unidentified	unidentified	unidentified
c3d30f559d0d1e2b0e10d34463f2be61	30	119	40	47	31	19	16	9	10	274	68	21	Fungi	Ascomycota	Sordariomycetes	Hypocreales	Nectriaceae	unidentified	unidentified
487c19cc08cf3cd591755e08f7a57f87	52	117	57	67	33	34	58	23	26	0	51	84	Fungi	Ascomycota	Sordariomycetes	Hypocreales	Nectriaceae	Fusarium	unidentified
16722356627eca5595337605213986f9	32	135	59	45	29	33	31	0	62	24	82	71	Fungi	Ascomycota	unidentified	unidentified	unidentified	unidentified	unidentified
5abcab060b7721e099f99be295960c6c	32	47	82	69	20	23	16	16	0	30	206	72	Fungi	Ascomycota	Sordariomycetes	Glomerellales	Plectosphaerellaceae	Verticillium	unidentified
ef23e8a400e7a7bda40097d4a993f160	26	52	41	33	13	15	19	27	0	14	25	27	Fungi	unidentified	unidentified	unidentified	unidentified	unidentified	unidentified
a2362693cd23eb6245b7a0dbf46345f0	50	66	52	0	0	37	18	35	0	118	86	61	Fungi	Ascomycota	Sordariomycetes	Hypocreales	unidentified	unidentified	unidentified
f9b7a8e024a6e6394ff00782c70e6a25	28	0	70	0	13	0	0	9	34	33	512	54	Fungi	Ascomycota	Sordariomycetes	unidentified	unidentified	unidentified	unidentified
e2fa98bfe1d0083a16ddedf596fbf3ed	291	16	55	30	21	38	30	0	6	24	79	42	Fungi	Ascomycota	Sordariomycetes	Sordariales	Lasiosphaeriaceae	unidentified	unidentified
023a74f57da4deaaff895c52e4bf10a7	69	49	124	47	74	16	17	20	33	34	59	53	Fungi	Ascomycota	Sordariomycetes	unidentified	unidentified	unidentified	unidentified
0ae62bf3d988a45cf982d7d6c70c1b58	30	74	71	64	35	36	25	14	14	58	91	50	Fungi	Ascomycota	unidentified	unidentified	unidentified	unidentified	unidentified
a6699f22db0082fea8c03c50233a12b4	72	0	249	84	0	0	0	0	0	0	73	76	Fungi	Mucoromycota	Mucoromycetes	Mucorales	Mucoraceae	Mucor	unidentified
69f531941abe21cfeaba198ce3bf00c6	127	80	65	66	0	0	17	0	0	49	71	65	Fungi	Ascomycota	Sordariomycetes	Microascales	Halosphaeriaceae	unidentified	unidentified
995cb8c34213f5291510f5fd3f987b92	51	22	57	34	27	10	0	0	0	310	42	36	Fungi	Ascomycota	Dothideomycetes	Pleosporales	unidentified	unidentified	unidentified
12430360cbc125dd406f2e13fd8e3812	81	107	63	27	0	0	0	0	0	110	131	40	Fungi	unidentified	unidentified	unidentified	unidentified	unidentified	unidentified
2d5a44a3efd96c40f13cede195144c9f	12	21	10	0	9	0	23	0	0	21	27	9	Fungi	Ascomycota	Sordariomycetes	Hypocreales	Stachybotryaceae	unidentified	unidentified
1162df915a3457c51b86776cf4c240cc	48	119	158	77	0	0	14	7	0	0	159	59	Fungi	Ascomycota	Pezizomycetes	Pezizales	Ascobolaceae	Ascobolus	unidentified
270883e6ac07e2968629a6de7ce390aa	25	40	66	71	7	21	0	22	7	29	91	46	Fungi	Mucoromycota	Mucoromycetes	Mucorales	Rhizopodaceae	Rhizopus	Rhizopus_arrhizus
e38976542120c94587121b97a52daf8c	18	0	59	0	34	281	0	0	0	0	0	0	Fungi	Basidiomycota	Agaricomycetes	Agaricales	Bolbitiaceae	Conocybe	unidentified
4f030ef7c30d0e5038f9239c246fc207	32	29	47	43	25	25	16	18	0	34	48	29	Fungi	Ascomycota	Dothideomycetes	Pleosporales	unidentified	unidentified	unidentified
10258ba3e66605f9215e5b33a1e99282	83	36	88	29	16	24	13	52	24	30	73	43	Fungi	Ascomycota	Sordariomycetes	Hypocreales	Nectriaceae	Fusarium	unidentified
923fc1ee2e737e2b740cfb5e0d887833	62	23	0	106	47	15	0	20	11	75	73	46	Fungi	Ascomycota	Pezizomycetes	Pezizales	Pyronemataceae	unidentified	unidentified
315e5140c4f22d5f5f31d2535e483c73	24	0	77	0	107	0	22	102	164	86	0	0	Fungi	Ascomycota	Dothideomycetes	Pleosporales	Pleosporaceae	Alternaria	unidentified
94bb9217dd8cdbfe2978666c9b97c928	21	19	24	71	9	15	11	3	0	14	13	16	Fungi	Ascomycota	Dothideomycetes	Pleosporales	unidentified	unidentified	unidentified
00063a0415b4c1b8930377abd06fea2a	51	30	26	20	0	19	11	0	0	129	51	0	Fungi	Ascomycota	Saccharomycetes	Saccharomycetales	Dipodascaceae	unidentified	unidentified
2f561885dfb13c7355bed541190aed05	23	22	99	40	12	16	0	11	12	32	72	44	Fungi	Basidiomycota	Atractiellomycetes	Atractiellales	Hoehnelomycetaceae	unidentified	unidentified
59a87f8dcd21ddc9ad28398c510d5dab	54	46	0	0	0	0	0	0	403	0	0	0	Fungi	Ascomycota	Leotiomycetes	Helotiales	unidentified	unidentified	unidentified
39e0792d5e867f0d23b03733df08576f	49	69	46	47	14	18	34	19	14	31	74	54	Fungi	Ascomycota	Dothideomycetes	Pleosporales	unidentified	unidentified	unidentified
af1502b7850cbc99a6873d52bd47b5cf	96	119	0	0	81	113	0	65	0	0	90	0	Fungi	Ascomycota	Pezizomycetes	Pezizales	Pyronemataceae	unidentified	unidentified
1c8db4423b364f0ea09d97c84f0dc030	30	56	25	55	17	14	16	9	0	65	40	28	Fungi	Ascomycota	Sordariomycetes	Hypocreales	unidentified	unidentified	unidentified
c2f3d3a8b6ae61f1958ad5c207cc19a5	76	34	33	40	22	30	24	20	0	50	102	32	Fungi	Ascomycota	unidentified	unidentified	unidentified	unidentified	unidentified
f16e4da4f72830c850b9b917443691d7	140	46	70	0	35	39	0	35	35	0	72	35	Fungi	Ascomycota	Sordariomycetes	Microascales	Halosphaeriaceae	unidentified	unidentified
642711ade7978baeb807ee5e77505bdb	0	337	0	0	0	0	0	0	0	0	0	96	Fungi	Mucoromycota	Mucoromycetes	Mucorales	Mucoraceae	Mucor	unidentified
19e5ce7719848b85a0140cadd9082aca	27	22	36	21	11	18	7	10	8	30	53	24	Fungi	unidentified	unidentified	unidentified	unidentified	unidentified	unidentified
f63ea6a77e42e19670d14b3189deb1b3	69	29	39	80	24	22	17	20	13	34	41	42	Fungi	Ascomycota	Sordariomycetes	Hypocreales	Stachybotryaceae	unidentified	unidentified
0fd2c1fb5dde2f7f0e2a7cb21bddacdd	18	0	0	60	34	49	70	23	29	82	0	54	Fungi	Ascomycota	Dothideomycetes	Pleosporales	unidentified	unidentified	unidentified
1e61ce1cf833989cbe89235797c10a28	22	16	15	28	13	10	14	12	6	19	20	12	Fungi	unidentified	unidentified	unidentified	unidentified	unidentified	unidentified
41b48a5621fcb955c20564bf8a98378a	15	65	14	19	11	17	10	12	0	35	26	20	Fungi	Basidiomycota	Cystobasidiomycetes	Cystobasidiales	Cystobasidiaceae	unidentified	unidentified
91faf7545ed2e823ce5d9fc68a98fb9d	31	22	64	55	50	39	68	14	0	0	51	83	Fungi	Ascomycota	Sordariomycetes	Sordariales	unidentified	unidentified	unidentified
80185293e4a9b7ccd97215c63e092d3b	68	43	39	20	12	0	7	31	96	14	66	15	Fungi	Basidiomycota	Microbotryomycetes	Sporidiobolales	Sporidiobolaceae	Rhodotorula	unidentified
428955b60f5e0143d7d4b923295ecbb3	29	51	38	43	20	14	10	13	0	74	78	42	Fungi	Ascomycota	Dothideomycetes	Pleosporales	unidentified	unidentified	unidentified
83b1a5717a493e7a4704585a98f3360f	0	24	33	41	0	25	0	0	19	0	0	41	Fungi	Ascomycota	Sordariomycetes	Coniochaetales	Coniochaetaceae	Coniochaeta	unidentified
c557b3c40ef42da9abeb37b4a05648ce	0	55	241	37	22	0	0	0	0	0	0	0	Fungi	Ascomycota	Sordariomycetes	Sordariales	unidentified	unidentified	unidentified
aa8df7c8fd3d1254fa1f6bd16870466a	0	0	35	0	35	45	0	0	0	54	46	67	Fungi	Ascomycota	Sordariomycetes	Sordariales	unidentified	unidentified	unidentified
dd3f6fc4e3662ca968ea96a7bc302d9a	402	97	0	0	0	0	0	0	0	0	0	0	Fungi	Ascomycota	Sordariomycetes	unidentified	unidentified	unidentified	unidentified
90f7ddbdea684de8d4beb5972e43f84f	0	0	0	0	0	56	0	0	0	0	0	52	Fungi	Ascomycota	Sordariomycetes	Sordariales	unidentified	unidentified	unidentified
1bfa4a8fa7bf860857db0a30b473f9c6	30	39	52	34	0	0	0	0	0	32	135	28	Fungi	Ascomycota	Sordariomycetes	unidentified	unidentified	unidentified	unidentified
461283cab944eed92de7545821180879	55	58	67	0	0	0	0	0	0	0	53	57	Fungi	Ascomycota	Saccharomycetes	Saccharomycetales	Dipodascaceae	unidentified	unidentified
b6be6ff277841dd7a3ca0175d597f106	0	81	51	0	0	37	27	19	0	58	74	0	Fungi	Ascomycota	Dothideomycetes	Pleosporales	Periconiaceae	Periconia	unidentified
7e2a06cd5e6bf654a25db2d4aa5f5c3d	24	32	35	44	25	27	21	18	7	32	53	33	Fungi	Ascomycota	Sordariomycetes	Hypocreales	unidentified	unidentified	unidentified
47fe2850ec6ba2464a7ae0cce79df4f4	0	0	27	0	19	0	0	0	0	0	0	30	Fungi	Ascomycota	Saccharomycetes	Saccharomycetales	Dipodascaceae	unidentified	unidentified
fb38dee06d3469b64e9dc63b21a227dd	43	30	42	39	17	23	14	10	6	38	63	49	Fungi	Basidiomycota	Agaricomycetes	Agaricales	Strophariaceae	Hypholoma	unidentified
7c6b7b93235535cf60530c3658cc415c	11	8	18	0	6	23	12	7	11	15	67	18	Fungi	Ascomycota	Sordariomycetes	Hypocreales	unidentified	unidentified	unidentified
d718ddbb8625562555dc7fa38a73da31	106	98	96	0	0	0	0	0	0	74	0	0	Fungi	Ascomycota	Sordariomycetes	Hypocreales	Nectriaceae	unidentified	unidentified
77b3b79765175fd10bb0a5361c36afec	32	46	30	59	15	11	0	7	21	37	54	32	Fungi	Ascomycota	Eurotiomycetes	Eurotiales	Trichocomaceae	Talaromyces	unidentified
4aef4a865d38c44c6d8ff14fbeb39487	58	0	0	0	22	16	11	0	31	0	237	11	Fungi	Ascomycota	Sordariomycetes	Sordariales	Lasiosphaeriaceae	unidentified	unidentified
eb17431861a641da1e56d8825e6b392a	94	61	67	0	13	9	27	51	19	27	34	11	Fungi	Ascomycota	Sordariomycetes	Sordariales	Lasiosphaeriaceae	unidentified	unidentified
90ce80896be14fb9e1ca362c7245290f	40	41	71	27	49	19	12	0	12	20	42	24	Fungi	Ascomycota	Sordariomycetes	Hypocreales	Nectriaceae	unidentified	unidentified
cd701c361af8263ef4c178788ec98445	100	19	26	34	22	13	28	0	9	33	40	26	Fungi	Ascomycota	Dothideomycetes	Pleosporales	unidentified	unidentified	unidentified
cf5a74a1ff685d6faadea8273aad4c85	0	0	0	0	11	0	0	364	0	0	29	14	Fungi	Ascomycota	Dothideomycetes	Pleosporales	unidentified	unidentified	unidentified
a55762fa4c4b1a7d2b34a05756a3c0f9	22	35	40	51	18	10	18	10	7	31	55	42	Fungi	Basidiomycota	Agaricomycetes	Polyporales	Ganodermataceae	Ganoderma	unidentified
bcbf3739c6671571b81563984c7a1d26	13	39	237	0	9	0	0	0	0	12	0	8	Fungi	Ascomycota	Sordariomycetes	Magnaporthales	Magnaporthaceae	Gaeumannomyces	unidentified
2cc9bba7faea9949bbfe856f395c4946	18	33	41	46	24	15	13	18	9	42	40	25	Fungi	Ascomycota	Sordariomycetes	Microascales	Microascaceae	Scopulariopsis	unidentified
94ad6d6d49452826b92eb7f45b3c3abc	27	17	30	39	35	14	11	0	0	31	52	36	Fungi	Ascomycota	Sordariomycetes	Hypocreales	Nectriaceae	unidentified	unidentified
3803bde77314f2ddde34d002cc3dab3c	0	0	372	0	0	0	0	0	0	32	0	0	Fungi	Ascomycota	Sordariomycetes	Sordariales	unidentified	unidentified	unidentified
a85a3b8dd62e3e1313dbc02dae5232bb	35	40	0	34	12	28	30	43	0	48	46	0	Fungi	Basidiomycota	Cystobasidiomycetes	Erythrobasidiales	Erythrobasidiales_fam_Incertae_sedis	Sakaguchia	unidentified
3733b0af077cdf770a634037f20f4c35	58	0	54	69	0	0	0	19	0	0	97	77	Fungi	Ascomycota	Sordariomycetes	Microascales	unidentified	unidentified	unidentified
b8df3a5e4b01eae4baed8bbe41233122	36	0	29	0	0	0	0	0	0	256	0	0	Fungi	Basidiomycota	Agaricomycetes	Agaricales	Psathyrellaceae	Psathyrella	unidentified
d29debcc21920a917b5d2b6857ab288e	19	135	22	30	20	10	10	7	6	13	29	31	Fungi	Ascomycota	Sordariomycetes	Hypocreales	Hypocreales_fam_Incertae_sedis	unidentified	unidentified
73a2b9b5f5292a69e9365965eea69d81	28	28	30	34	25	11	13	8	8	23	32	19	Fungi	Ascomycota	Sordariomycetes	Glomerellales	Plectosphaerellaceae	unidentified	unidentified
e397b67ebad74edd829a5874220b9cbd	0	90	0	0	0	0	0	0	0	0	0	184	Fungi	Basidiomycota	Tremellomycetes	Cystofilobasidiales	Mrakiaceae	unidentified	unidentified
5e24173a6d3df66065d1a77dbb702411	18	45	23	75	10	7	11	4	10	24	55	34	Fungi	unidentified	unidentified	unidentified	unidentified	unidentified	unidentified
be29d2a0a7c5381428bd0e5d3046e665	0	32	0	109	20	30	32	15	37	0	0	0	Fungi	Ascomycota	Dothideomycetes	Pleosporales	Torulaceae	Torula	unidentified
78375ce9ec06751cd27aaa2330c89da8	35	175	37	0	0	15	25	0	3	0	50	0	Fungi	Ascomycota	Sordariomycetes	Hypocreales	Hypocreales_fam_Incertae_sedis	Sarocladium	unidentified
6cd929b3c42690af578cd536fa0ae452	0	128	0	29	0	23	0	0	0	0	91	65	Fungi	Ascomycota	Dothideomycetes	Pleosporales	Pleosporaceae	Alternaria	unidentified
221631a67dc75ca9b4e12147f8356043	80	0	63	0	0	0	0	0	0	0	0	0	Fungi	Mucoromycota	Mucoromycetes	Mucorales	Mucoraceae	Mucor	unidentified
e1eb4ddd8872e257bf63d1d12ab57358	4	31	13	32	15	13	9	0	4	18	44	70	Fungi	Ascomycota	Sordariomycetes	Hypocreales	unidentified	unidentified	unidentified
89ddc74839dd2e66b9bb73a03a1f8e24	24	21	33	42	20	9	19	15	4	22	35	53	Fungi	Ascomycota	Sordariomycetes	Hypocreales	Clavicipitaceae	unidentified	unidentified
cfd4eaf2e97200800f558624d550ae34	31	35	23	17	0	0	13	0	4	30	54	33	Fungi	Basidiomycota	Tremellomycetes	Holtermanniales	Holtermanniales_fam_Incertae_sedis	Holtermanniella	unidentified
c0503b3dbc61ec09c826ba120df7617e	0	43	0	37	0	0	0	0	0	0	0	36	Fungi	unidentified	unidentified	unidentified	unidentified	unidentified	unidentified
40438f04ca1641fad89f4f5e2b613df5	13	35	26	61	12	14	10	0	8	24	55	29	Fungi	Ascomycota	Sordariomycetes	unidentified	unidentified	unidentified	unidentified
322dca3fc6bd7e4c401d713a7ff74a6e	17	30	18	36	16	9	0	8	0	21	66	29	Fungi	Ascomycota	Sordariomycetes	Coniochaetales	Coniochaetaceae	Coniochaeta	unidentified
7bf655593cbcea41f79bfe8f0b629535	0	99	0	0	38	31	0	0	0	55	0	0	Fungi	Ascomycota	Sordariomycetes	Microascales	unidentified	unidentified	unidentified
dbd5a6699656e997ef5ca57256c6af9a	0	35	28	39	0	31	16	0	0	32	51	36	Fungi	Ascomycota	Sordariomycetes	Hypocreales	unidentified	unidentified	unidentified
b12f3213cb0ced207c861ef00a3ffea4	19	25	20	37	20	41	0	0	10	35	25	20	Fungi	Ascomycota	Leotiomycetes	Thelebolales	Pseudeurotiaceae	unidentified	unidentified
7f7b4c45e1cff8fe45be1369eba87b29	0	17	0	12	0	21	23	11	0	0	123	14	Fungi	Ascomycota	Sordariomycetes	Hypocreales	Nectriaceae	unidentified	unidentified
4668edfe68951e12907967a94f889f59	18	14	19	19	0	20	8	24	0	111	12	17	Fungi	Basidiomycota	Agaricomycetes	Trechisporales	Hydnodontaceae	Trechispora	unidentified
2199ab2ca825196eb3b3e15c69feb76a	203	17	0	0	0	0	0	0	0	0	68	0	Fungi	Basidiomycota	Agaricomycetes	Agaricales	unidentified	unidentified	unidentified
d69f313f206954f27c10be9e80607720	16	29	31	55	0	0	0	0	0	25	45	21	Fungi	Ascomycota	Sordariomycetes	unidentified	unidentified	unidentified	unidentified
8013df8381f53e8e8bac1c2af02f3994	116	14	63	63	0	13	0	0	0	0	0	0	Fungi	Ascomycota	Leotiomycetes	Helotiales	unidentified	unidentified	unidentified
86fa5dfc032e000325866d8ebd26251f	19	41	18	5	4	13	11	0	0	14	27	21	Fungi	Ascomycota	Saccharomycetes	Saccharomycetales	Phaffomycetaceae	Wickerhamomyces	Wickerhamomyces_anomalus
649c0e58a45d3e77885ebb8c5fd53354	0	0	27	30	0	0	0	0	0	30	87	47	Fungi	Ascomycota	Sordariomycetes	unidentified	unidentified	unidentified	unidentified
b40d9f3cf79ab46e211700a9bf2c9778	47	0	33	35	0	19	16	0	0	25	0	22	Fungi	Ascomycota	Sordariomycetes	unidentified	unidentified	unidentified	unidentified
ba6cefcacaa8cba652b0c6fdf19b1e47	30	35	17	22	13	15	15	6	0	20	29	20	Fungi	Ascomycota	Sordariomycetes	Hypocreales	Clavicipitaceae	unidentified	unidentified
9fa704ce6e839b52abb96d7833e21766	24	18	15	0	42	26	0	0	0	84	33	0	Fungi	Ascomycota	Dothideomycetes	Dothideales	Aureobasidiaceae	Aureobasidium	unidentified
91b15a12534efb184629a504532439bb	5	10	0	40	14	0	3	0	0	34	0	5	Fungi	Ascomycota	Pezizomycetes	Pezizales	Pyronemataceae	unidentified	unidentified
dbefa31355f4b443d3784eda8dbe1cfa	16	31	14	48	12	12	11	10	0	20	39	20	Fungi	Ascomycota	Sordariomycetes	Hypocreales	unidentified	unidentified	unidentified
a743a121704a8157887a21ea914a748b	0	22	19	31	15	0	40	0	0	10	43	33	Fungi	Basidiomycota	Agaricomycetes	unidentified	unidentified	unidentified	unidentified
5eba47753913b328139aa2286d84a9db	31	0	19	31	13	23	0	0	0	16	28	22	Fungi	unidentified	unidentified	unidentified	unidentified	unidentified	unidentified
b230085bf5afc16e817507293f55bbdc	0	53	0	21	0	93	0	0	0	24	0	61	Fungi	Ascomycota	Sordariomycetes	Hypocreales	Nectriaceae	Volutella	unidentified
6870ab9f704ba44cb4cd5d9559096a5f	0	0	0	116	41	0	0	0	0	0	0	78	Fungi	Ascomycota	Dothideomycetes	Pleosporales	Periconiaceae	Periconia	unidentified
234ef8b6a60140326b92850df351dff9	57	13	0	0	0	0	28	0	0	0	45	21	Fungi	Ascomycota	Sordariomycetes	Coniochaetales	Coniochaetaceae	Coniochaeta	unidentified
b3ddf2eddf73a8e73c241a695099c8d6	56	153	0	0	0	22	0	0	0	0	0	0	Fungi	unidentified	unidentified	unidentified	unidentified	unidentified	unidentified
4dc048515dbc74d14965bba8b5ab9938	0	71	58	0	0	0	0	0	0	0	0	0	Fungi	unidentified	unidentified	unidentified	unidentified	unidentified	unidentified
8e3f59b7d21d539cb1fdc4e3776d2392	6	8	2	0	4	0	0	0	4	0	11	4	Fungi	Ascomycota	Dothideomycetes	Dothideomycetes_ord_Incertae_sedis	Eremomycetaceae	Arthrographis	unidentified
46f0707ee16d7eca83e4b12f828a4fd5	21	16	24	16	0	0	0	0	0	10	77	14	Fungi	Rozellomycota	Rozellomycotina_cls_Incertae_sedis	GS08	unidentified	unidentified	unidentified
da5ebb123526340611f2c34248274296	17	17	22	18	19	12	18	0	0	11	21	25	Fungi	Ascomycota	Dothideomycetes	Pleosporales	unidentified	unidentified	unidentified
e12db008645b8260830f449764859410	0	0	60	71	0	0	0	0	0	0	0	0	Fungi	unidentified	unidentified	unidentified	unidentified	unidentified	unidentified
d89b0570e6dc6c1d32510f2d5d41a2bc	12	13	19	12	0	8	2	5	10	4	15	16	Fungi	Basidiomycota	Spiculogloeomycetes	Spiculogloeales	Spiculogloeaceae	Phyllozyma	Phyllozyma_linderae
137f8514e3de025381e9e098a2d65dd4	0	0	0	9	0	0	0	5	0	14	11	8	Fungi	Ascomycota	Sordariomycetes	Hypocreales	unidentified	unidentified	unidentified
a6170f6a7c27466b326b4b3e3b869d68	0	63	0	0	0	0	0	0	62	0	93	0	Fungi	Ascomycota	Eurotiomycetes	Eurotiales	Aspergillaceae	Penicillium	unidentified
55e1e3a7296312786650e175bc3a8856	7	7	4	0	0	0	0	0	0	7	0	4	Fungi	Ascomycota	Dothideomycetes	Pleosporales	unidentified	unidentified	unidentified
fac804ad5cc515c2da01e727a82a8747	0	60	0	0	0	0	0	0	0	0	122	0	Fungi	Ascomycota	Sordariomycetes	Hypocreales	unidentified	unidentified	unidentified
65f45d17c9bbc42e632887e2a3474cef	6	22	13	17	15	11	8	0	7	24	12	25	Fungi	Ascomycota	Leotiomycetes	Helotiales	Leotiaceae	Neobulgaria	unidentified
9c053011034d992162a5a81b9dcea2c6	12	57	0	22	0	0	8	10	0	18	21	24	Fungi	Ascomycota	Dothideomycetes	Pleosporales	Torulaceae	Torula	unidentified
938f081503dcc78e886734291dcf79f3	0	11	7	0	0	0	0	0	0	0	0	0	Fungi	Mucoromycota	Mucoromycetes	Mucorales	Mucoraceae	Mucor	unidentified
00ba593f00194b415ddcbfc6bc9f4a79	0	5	0	0	135	0	0	0	0	8	0	47	Fungi	Ascomycota	unidentified	unidentified	unidentified	unidentified	unidentified
d71e042de7467309d95dec8e50707924	33	0	43	0	0	0	0	0	0	37	55	25	Fungi	Ascomycota	Dothideomycetes	Pleosporales	Torulaceae	Torula	unidentified
a3cd4fa6962f925fbfa67280e9aeca03	11	31	12	0	16	12	8	13	0	34	0	16	Fungi	Ascomycota	Sordariomycetes	Microascales	Microascaceae	unidentified	unidentified
083de3d13252f96a37a4ce6cf2df7f30	0	81	57	0	49	0	0	0	0	0	0	0	Fungi	Ascomycota	Sordariomycetes	Sordariales	Lasiosphaeriaceae	unidentified	unidentified
d4fe6ce7a1426fc274c1765bb766f0a4	6	0	11	0	0	0	0	0	0	12	0	0	Fungi	Ascomycota	Sordariomycetes	Microascales	Microascaceae	Scedosporium	unidentified
e6743f15f8398b0785e194347d28f83d	6	18	8	15	8	24	0	0	6	13	52	10	Fungi	Ascomycota	unidentified	unidentified	unidentified	unidentified	unidentified
c7e216fa8f61b48276f827a953555348	0	20	64	0	6	0	0	0	0	9	25	32	Fungi	Ascomycota	Sordariomycetes	Hypocreales	unidentified	unidentified	unidentified
57549acc4d63960d39aab292bc16de2d	10	34	16	33	11	10	10	9	0	0	0	12	Fungi	Basidiomycota	Agaricomycetes	unidentified	unidentified	unidentified	unidentified
ea0896485569fcdb10a0fca09429d571	0	0	0	0	0	0	0	0	5	0	0	30	Fungi	Basidiomycota	Agaricomycetes	Agaricales	Bolbitiaceae	Conocybe	unidentified
45eccb35ed55d000b44d03a96edaf112	0	0	70	0	38	0	0	0	0	0	68	0	Fungi	Ascomycota	Sordariomycetes	Sordariales	unidentified	unidentified	unidentified
5ffce6611c272119d992453626a6af1f	0	0	36	27	0	0	13	0	0	0	55	2	Fungi	Mucoromycota	Mucoromycetes	Mucorales	Mucoraceae	Mucor	unidentified
25d0a88d0d2051a899b1ee7412b5ce76	11	21	14	29	8	0	0	0	0	0	24	21	Fungi	Ascomycota	Sordariomycetes	Coniochaetales	Coniochaetaceae	unidentified	unidentified
288889773d9ab7ed4a7c345c9152e291	0	30	0	42	38	13	22	20	6	0	0	0	Fungi	Basidiomycota	Agaricomycetes	Agaricales	unidentified	unidentified	unidentified
ce3724827f33cb624d5d93f1ea17793e	95	0	0	0	0	20	0	0	0	0	55	0	Fungi	Ascomycota	Sordariomycetes	Hypocreales	Nectriaceae	unidentified	unidentified
b91a6c4baa5f3a361a43101b09e38441	16	70	0	0	43	0	0	0	0	0	0	21	Fungi	Ascomycota	Sordariomycetes	Sordariales	Lasiosphaeriaceae	unidentified	unidentified
341a631ed5843eb7035c02cf832f21e0	29	0	22	0	16	0	0	0	0	0	23	37	Fungi	Ascomycota	Sordariomycetes	Coniochaetales	Coniochaetaceae	Coniochaeta	unidentified
3c4638ced38caff140f44a6b95e1c0dd	0	13	39	18	0	0	0	5	13	8	15	14	Fungi	Ascomycota	Sordariomycetes	unidentified	unidentified	unidentified	unidentified
995c37a6e40bb2d5b3ab6cef63617fd1	0	0	0	0	0	62	0	0	0	54	44	0	Fungi	unidentified	unidentified	unidentified	unidentified	unidentified	unidentified
82f42db360b5f3383f13dd888bd84ce4	0	13	23	20	0	0	0	54	0	13	15	0	Fungi	Ascomycota	Eurotiomycetes	Eurotiales	Aspergillaceae	Penicillium	unidentified
2cb80e973b853112e8380625af1bffa6	0	0	0	0	0	14	11	0	0	17	0	0	Fungi	Ascomycota	Leotiomycetes	Helotiales	unidentified	unidentified	unidentified
eea3fed769f9f92c2074994dd1c78b42	19	8	48	4	4	0	0	0	0	15	27	7	Fungi	Rozellomycota	Rozellomycotina_cls_Incertae_sedis	GS07	unidentified	unidentified	unidentified
64b206f88faf6c14b453d36aab8c4725	9	0	10	31	0	10	0	14	0	20	20	8	Fungi	Ascomycota	Sordariomycetes	Chaetosphaeriales	Chaetosphaeriaceae	unidentified	unidentified
36133c667bab19f8f2e26c95eba464b9	0	19	0	0	19	0	0	0	0	0	113	0	Fungi	Ascomycota	Pezizomycetes	Pezizales	Pezizaceae	Peziza	unidentified
2e72f9af2cbe210f497b8bd9e412e5d4	0	0	23	53	0	19	0	0	11	0	43	0	Fungi	Ascomycota	Sordariomycetes	Sordariales	Lasiosphaeriaceae	unidentified	unidentified
3866788ed48986db171d2aa1e4045865	38	0	0	0	0	0	0	0	0	0	0	52	Fungi	unidentified	unidentified	unidentified	unidentified	unidentified	unidentified
ee96106c10f9b29d072fadb367cd9ce8	14	19	11	21	0	4	0	0	0	13	13	0	Fungi	Ascomycota	Orbiliomycetes	Orbiliales	Orbiliaceae	Arthrobotrys	unidentified
252c7989af545721682fe15c6e3288d7	0	0	0	68	0	0	0	0	0	0	49	0	Fungi	unidentified	unidentified	unidentified	unidentified	unidentified	unidentified
10ef3cd35996a80fce45d50acb182b9d	0	0	38	22	0	0	18	0	14	20	0	31	Fungi	Basidiomycota	Cystobasidiomycetes	unidentified	unidentified	unidentified	unidentified
8dcfbe030de93d76fac043b51d6fbede	4	16	25	28	14	0	0	8	0	0	0	0	Fungi	Ascomycota	Leotiomycetes	Helotiales	unidentified	unidentified	unidentified
4873e1eab7422a3333fc77853b720a4e	0	0	0	0	0	0	32	17	0	0	26	17	Fungi	Ascomycota	Sordariomycetes	Sordariales	Lasiosphaeriaceae	unidentified	unidentified
d6d824a7ecea6ef1f9816f3de8b5d8ab	24	23	21	0	16	0	8	0	0	9	25	0	Fungi	Ascomycota	Sordariomycetes	Hypocreales	Nectriaceae	Fusarium	unidentified
069d060e68527470993fb7d62391da44	0	0	0	25	31	0	0	46	0	0	35	0	Fungi	Ascomycota	Leotiomycetes	Helotiales	unidentified	unidentified	unidentified
81c13b3cf9fae2dc3bfe215a1434c295	14	11	14	18	0	0	0	0	0	15	13	17	Fungi	unidentified	unidentified	unidentified	unidentified	unidentified	unidentified
757eaf8230d1d9516605ef83d1ca2104	8	11	15	17	7	8	6	6	0	11	15	22	Fungi	Ascomycota	Eurotiomycetes	Eurotiales	Trichocomaceae	Talaromyces	unidentified
b76502fb95dcf40a049e337afd32b208	48	0	18	25	0	0	0	0	0	0	0	0	Fungi	unidentified	unidentified	unidentified	unidentified	unidentified	unidentified
f1371815d1b7a619f732ca6fdde0aad9	12	22	3	0	3	3	0	18	7	0	9	0	Fungi	Basidiomycota	Tremellomycetes	Tremellales	unidentified	unidentified	unidentified
38e2bcaca3d9824495eeb9fc769a9f54	20	0	0	24	24	0	0	0	29	0	0	0	Fungi	Ascomycota	Sordariomycetes	Hypocreales	Hypocreaceae	Trichoderma	unidentified
46fbc7cccd068b25df596248963ea7ec	0	0	66	0	0	67	0	0	0	0	0	0	Fungi	Ascomycota	Sordariomycetes	Sordariales	Lasiosphaeriaceae	unidentified	unidentified
bc81d351c9d21c965cb877c126d1c712	0	25	12	13	0	11	17	8	0	6	10	0	Fungi	Ascomycota	Leotiomycetes	Helotiales	unidentified	unidentified	unidentified
be95a6c24909324fa981abc5b6ec2f33	0	19	0	64	0	0	0	0	0	49	0	0	Fungi	Ascomycota	Sordariomycetes	Coniochaetales	Coniochaetaceae	Coniochaeta	unidentified
1db7111c654b0d5e76f0fde8de140665	10	0	15	0	0	0	4	0	3	0	9	0	Fungi	unidentified	unidentified	unidentified	unidentified	unidentified	unidentified
288847949d3f1a86c50ea0f059b529cc	20	0	10	15	9	0	7	0	0	12	26	20	Fungi	Ascomycota	Sordariomycetes	Sordariales	Chaetomiaceae	unidentified	unidentified
ee4bf8a41e293ac421c642fcfb932cb1	0	0	0	12	0	0	116	0	0	0	0	0	Fungi	Basidiomycota	Agaricomycetes	Sebacinales	Sebacinaceae	unidentified	unidentified
953aca1781f326cccc98dbdaa3ff7e6f	9	11	19	14	7	0	6	0	0	10	0	16	Fungi	Ascomycota	Leotiomycetes	Helotiales	Helotiaceae	Scytalidium	unidentified
1a31231eea44df48a0acd7029af628ee	0	24	0	0	16	0	0	0	0	0	0	20	Fungi	Ascomycota	Sordariomycetes	unidentified	unidentified	unidentified	unidentified
623519665ee4cce6a7debaeb045f4f89	0	20	0	7	26	0	0	0	0	32	0	31	Fungi	unidentified	unidentified	unidentified	unidentified	unidentified	unidentified
381fcbc5deeb0f2a829fd47758590f05	11	56	3	13	0	0	4	0	0	8	0	13	Fungi	Ascomycota	Dothideomycetes	Pleosporales	unidentified	unidentified	unidentified
fa13794357538928834f491fff538d00	0	0	0	62	28	0	0	0	0	34	0	0	Fungi	Ascomycota	Sordariomycetes	Sordariales	Chaetomiaceae	Chaetomium	unidentified
38eb67df1994b8165d5ceb30bfb3ff31	26	14	9	20	0	4	0	0	0	12	9	13	Fungi	Ascomycota	Saccharomycetes	Saccharomycetales	unidentified	unidentified	unidentified
f6825357da9186cb03efd8994c28c3c5	20	23	21	13	11	9	0	0	0	0	0	11	Fungi	Ascomycota	Leotiomycetes	Helotiales	unidentified	unidentified	unidentified
e34f8966fa6833db7a15813a2cfcfb75	104	0	0	0	0	0	0	0	17	0	0	0	Fungi	Ascomycota	Sordariomycetes	Magnaporthales	Magnaporthaceae	unidentified	unidentified
a4c40b6d8dca569ccaf8b75cfeadd41a	19	10	8	0	9	0	7	0	0	0	21	14	Fungi	Ascomycota	Eurotiomycetes	unidentified	unidentified	unidentified	unidentified
dafc5e1476d19720421810d69f9365fa	0	0	29	0	0	0	21	0	0	29	0	0	Fungi	Ascomycota	Dothideomycetes	Pleosporales	Phaeosphaeriaceae	Paraphoma	unidentified
e17f29bd4890760a445617896ed63ea9	16	5	8	18	0	10	1	0	0	0	21	3	Fungi	Basidiomycota	Microbotryomycetes	Leucosporidiales	Leucosporidiaceae	unidentified	unidentified
031c2bb6b1528e536e0bb2d29103b0a3	0	0	0	33	58	0	23	0	0	0	0	0	Fungi	Ascomycota	Sordariomycetes	Sordariales	unidentified	unidentified	unidentified
5ddc4b362d2338c53783829e67347df5	30	5	13	0	5	0	0	14	0	0	10	9	Fungi	Ascomycota	Sordariomycetes	Microascales	Halosphaeriaceae	unidentified	unidentified
a10fb3fd42bd55a5a37fda0a9458f78f	0	0	0	0	40	14	0	0	0	27	28	0	Fungi	Ascomycota	Sordariomycetes	Sordariales	Chaetomiaceae	unidentified	unidentified
6e76c9e8757da55af1182ba705a3899e	0	0	0	20	12	10	9	0	0	0	0	0	Fungi	Chytridiomycota	Rhizophydiomycetes	Rhizophydiales	unidentified	unidentified	unidentified
7257e82c7cecf92bdccdc7162b0975a4	0	0	0	0	0	0	0	0	0	13	95	0	Fungi	Ascomycota	Pezizomycetes	Pezizales	Ascobolaceae	unidentified	unidentified
f77f67da62d67e0a556a6026a495afca	0	15	23	0	0	0	11	0	0	8	14	0	Fungi	Ascomycota	Sordariomycetes	Microascales	Microascaceae	Microascus	unidentified
b3be0fe87dd7702079f6af63d1ba1ba8	36	0	0	0	0	0	0	0	0	50	20	0	Fungi	Ascomycota	Sordariomycetes	Hypocreales	Nectriaceae	Fusarium	unidentified
c212bc9a5bd21c00971bf914388c3daf	0	8	0	37	0	0	0	0	0	0	0	25	Fungi	Ascomycota	Sordariomycetes	Sordariales	Chaetomiaceae	unidentified	unidentified
64135dd07841063ae955f7a7e76e2ea7	0	5	21	0	0	6	0	5	0	0	10	21	Fungi	Ascomycota	Dothideomycetes	Pleosporales	unidentified	unidentified	unidentified
9eda0a2b23ab706986682e199ca17262	26	0	0	12	16	12	0	0	0	9	0	15	Fungi	Ascomycota	Sordariomycetes	Hypocreales	Nectriaceae	Fusicolla	unidentified
00bb7d02eef232fcacfd673613e6b3b7	22	21	7	12	4	0	0	0	9	0	0	9	Fungi	Ascomycota	unidentified	unidentified	unidentified	unidentified	unidentified
be10a773dc704ca32eba874cadb33b0b	8	15	10	25	0	0	0	0	0	0	0	10	Fungi	Ascomycota	Dothideomycetes	Pleosporales	Phaeosphaeriaceae	unidentified	unidentified
44dda8492c7d35df8eb5de80984d7e40	0	24	8	13	0	0	0	0	0	20	7	6	Fungi	unidentified	unidentified	unidentified	unidentified	unidentified	unidentified
da275629dc61eb68760f1485613f4898	0	11	14	20	0	0	5	0	0	5	32	14	Fungi	Ascomycota	Dothideomycetes	Botryosphaeriales	Botryosphaeriaceae	Diplodia	unidentified
66cb14993cd4f0a60b6533b0edd21bb3	0	7	6	0	0	0	0	0	0	52	14	10	Fungi	Ascomycota	Sordariomycetes	Hypocreales	Stachybotryaceae	unidentified	unidentified
68b8321cfc27c008beae528411358bcf	5	6	16	0	6	9	6	0	0	8	4	33	Fungi	Ascomycota	Saccharomycetes	Saccharomycetales	Debaryomycetaceae	Schwanniomyces	unidentified
531ed0961b472197e5dac7019a85be12	16	0	0	0	0	0	0	27	29	0	0	26	Fungi	Ascomycota	Dothideomycetes	Pleosporales	Pleosporaceae	Alternaria	unidentified
c279f489a21e1a939c23786a362c7536	0	9	18	0	0	0	7	0	0	13	30	0	Fungi	Ascomycota	Eurotiomycetes	Eurotiales	Thermoascaceae	Byssochlamys	Byssochlamys_lagunculariae
2c2e30bac3f37465fc337eda4fc82b19	0	6	11	11	0	0	7	0	0	7	16	12	Fungi	Ascomycota	Saccharomycetes	Saccharomycetales	Saccharomycetales_fam_Incertae_sedis	Candida	unidentified
4d2f3f13a53b164d6ac3eacc71f6680d	0	0	0	0	44	8	6	0	0	0	0	18	Fungi	Ascomycota	Dothideomycetes	Pleosporales	Sporormiaceae	unidentified	unidentified
b7654b661e846d4002cb9173cbc72b8b	11	0	10	21	0	0	0	0	0	55	0	0	Fungi	Ascomycota	Orbiliomycetes	Orbiliales	Orbiliaceae	Arthrobotrys	unidentified
4b087389ad7e66f7e7ab7610315f1c6f	0	84	0	0	5	0	0	0	0	0	0	0	Fungi	Ascomycota	Eurotiomycetes	Chaetothyriales	unidentified	unidentified	unidentified
acbe5e5877dead38446b40b7f369ab2f	35	0	0	20	0	0	0	0	0	0	40	0	Fungi	Ascomycota	Dothideomycetes	Tubeufiales	Tubeufiaceae	unidentified	unidentified
f3513725c7782bb93e45f046e594bfa9	18	41	13	0	0	12	0	0	0	0	0	0	Fungi	Ascomycota	Sordariomycetes	Hypocreales	Ophiocordycipitaceae	unidentified	unidentified
1ba5dfea2324305402e0bc9659aeffef	0	31	43	20	0	0	0	0	0	0	0	0	Fungi	Ascomycota	Sordariomycetes	Hypocreales	Nectriaceae	unidentified	unidentified
3b93e03bf0ce2814c79f5c9b2226a0dc	0	27	0	0	16	0	0	11	0	0	39	0	Fungi	Ascomycota	Sordariomycetes	unidentified	unidentified	unidentified	unidentified
b79b25b9a74e11822f6acb57f3a763ac	0	10	19	0	0	5	7	0	0	10	12	10	Fungi	Basidiomycota	Tremellomycetes	Tremellales	unidentified	unidentified	unidentified
0a8b4b0bae20c3e1aa6eba50ed340d35	0	0	0	0	0	11	0	29	7	0	14	20	Fungi	Ascomycota	Sordariomycetes	Hypocreales	unidentified	unidentified	unidentified
f401cb21252689257cdf72b290e4b434	0	13	0	36	13	0	0	0	0	0	0	0	Fungi	Mucoromycota	Mucoromycetes	Mucorales	Mucoraceae	unidentified	unidentified
e2301c5ff407243cec3c76e56d3ea320	0	3	73	0	0	0	0	0	0	0	0	0	Fungi	Ascomycota	Sordariomycetes	unidentified	unidentified	unidentified	unidentified
38bba17297ee07fafcb6f8a113d6c41d	0	25	39	0	0	0	0	0	0	23	0	0	Fungi	unidentified	unidentified	unidentified	unidentified	unidentified	unidentified
0daab6ec53499fd3f62cad40fb28b4da	0	10	0	23	0	21	0	0	0	32	0	0	Fungi	Ascomycota	Sordariomycetes	unidentified	unidentified	unidentified	unidentified
42e4e617447e24f81499a325fe48e39a	0	3	21	33	12	0	0	0	0	0	0	11	Fungi	Ascomycota	Dothideomycetes	Pleosporales	unidentified	unidentified	unidentified
d99334aa9cfcd962edcb9f020b0bf9ee	0	29	20	20	0	0	0	0	0	0	0	0	Fungi	Ascomycota	Sordariomycetes	Hypocreales	Hypocreaceae	Trichoderma	unidentified
c3482bf382344d35fa9d002859c64fd8	0	13	13	10	0	21	0	0	0	0	10	18	Fungi	Ascomycota	Sordariomycetes	Sordariales	unidentified	unidentified	unidentified
c14bc28c3ddad79d1248cc5c4dde160e	9	0	0	0	3	24	11	4	0	0	0	16	Fungi	Chytridiomycota	Rhizophydiomycetes	Rhizophydiales	unidentified	unidentified	unidentified
7e5708caa39fe4480b89bb265cf795f1	0	61	0	0	0	0	0	13	0	0	0	0	Fungi	Ascomycota	Eurotiomycetes	Chaetothyriales	Trichomeriaceae	Knufia	unidentified
b0b5f67904a2c503d1ab175a5439da74	0	11	9	0	0	0	0	0	0	10	18	10	Fungi	Ascomycota	unidentified	unidentified	unidentified	unidentified	unidentified
743cdaff15287609e5bffbf0dd07253f	9	0	9	6	0	8	0	10	0	24	0	0	Fungi	Ascomycota	Sordariomycetes	Sordariales	Chaetomiaceae	unidentified	unidentified
b72a3db721eab2762bd38c703515b39a	0	9	0	0	0	0	0	0	0	0	18	0	Fungi	unidentified	unidentified	unidentified	unidentified	unidentified	unidentified
0866c82e7a0d7c5cf93573c2f38b0235	0	6	16	20	0	0	0	0	0	19	11	8	Fungi	Rozellomycota	Rozellomycotina_cls_Incertae_sedis	GS08	unidentified	unidentified	unidentified
dc1525d48b07a15b353c4051fb56d47a	0	0	0	15	15	0	0	5	0	15	19	11	Fungi	Ascomycota	Sordariomycetes	Hypocreales	Ophiocordycipitaceae	Tolypocladium	unidentified
c91e9a025377b5dab3b1c48831597354	53	0	0	0	5	4	0	0	0	0	6	0	Fungi	Ascomycota	Sordariomycetes	Hypocreales	unidentified	unidentified	unidentified
6c7edbe2c33cb691feb973c0dbfa1e51	0	0	20	42	0	0	0	0	0	0	0	5	Fungi	unidentified	unidentified	unidentified	unidentified	unidentified	unidentified
9fb75d87507d879d1e49b1893e7f6049	16	0	0	16	0	0	0	0	0	15	0	0	Fungi	Ascomycota	Pezizomycetes	Pezizales	Pezizaceae	Peziza	unidentified
abc4c1b126e4d17e4a945be3d9f01560	14	26	0	0	0	0	0	0	0	19	17	0	Fungi	unidentified	unidentified	unidentified	unidentified	unidentified	unidentified
6bd912d809da6ead3357a1fac24fd8db	0	0	0	42	0	0	0	11	23	0	0	0	Fungi	unidentified	unidentified	unidentified	unidentified	unidentified	unidentified
f10ddac30f0ac9b00d207309dd048773	0	0	0	0	0	0	4	0	0	44	0	28	Fungi	unidentified	unidentified	unidentified	unidentified	unidentified	unidentified
cab99f59c8e378f795a3366610b432a1	0	8	0	0	0	0	17	0	0	10	30	0	Fungi	Ascomycota	unidentified	unidentified	unidentified	unidentified	unidentified
8869db7a9487b58f9e72fd2a3e0b4451	0	0	0	0	0	0	0	0	0	0	17	29	Fungi	unidentified	unidentified	unidentified	unidentified	unidentified	unidentified
95559741c1e4b43f3aa8cbd08d24929a	8	6	7	5	10	6	6	0	0	0	0	0	Fungi	unidentified	unidentified	unidentified	unidentified	unidentified	unidentified
889f82658ab77c72d722d620b8475d58	8	12	29	6	0	0	0	0	0	0	7	6	Fungi	Rozellomycota	Rozellomycotina_cls_Incertae_sedis	GS08	unidentified	unidentified	unidentified
111c1965f17d91fd8246a5fff21619af	5	0	4	10	3	11	0	9	0	10	9	7	Fungi	Ascomycota	Dothideomycetes	Capnodiales	unidentified	unidentified	unidentified
c3184cb820f92a28f7ec72414ac16638	0	0	9	0	7	4	0	9	0	8	30	0	Fungi	Ascomycota	Sordariomycetes	Glomerellales	Plectosphaerellaceae	unidentified	unidentified
020eb42f387a6179d10dd1dbc2b50aab	0	0	0	0	19	16	0	0	0	20	0	19	Fungi	Ascomycota	Eurotiomycetes	Eurotiales	Aspergillaceae	Penicillium	unidentified
be0c6eb54995840cb9beac6b55e0c5c3	20	15	6	0	0	0	0	0	0	8	0	0	Fungi	Basidiomycota	Tremellomycetes	Trichosporonales	Trichosporonaceae	Cutaneotrichosporon	unidentified
a227133a7b9f9b1b3b713dfe183ac668	6	7	0	0	0	6	3	0	0	3	8	5	Fungi	Ascomycota	Orbiliomycetes	Orbiliales	Orbiliales_fam_Incertae_sedis	Microdochiella	Microdochiella_fusarioides
79ff6e2efeb35e8529960cf66d7049f2	0	38	0	0	0	0	34	0	0	0	0	0	Fungi	Ascomycota	Pezizomycetes	Pezizales	Pyronemataceae	unidentified	unidentified
7b5528b496f5ad0249b6354b79ba80ed	49	0	0	0	0	0	0	0	0	22	0	0	Fungi	Ascomycota	Sordariomycetes	Hypocreales	Nectriaceae	unidentified	unidentified
4df98395057a93e3a098631a1d4c5e0c	0	0	26	0	0	10	15	0	0	0	0	19	Fungi	Ascomycota	Pezizomycetes	Pezizales	Pezizaceae	Peziza	unidentified
f12de3c444d0c291a98c87ad95069a7e	0	0	10	0	0	0	0	0	0	0	18	0	Fungi	Chytridiomycota	Rhizophydiomycetes	Rhizophydiales	unidentified	unidentified	unidentified
d384094065794013f55a9c66c595bfe0	0	0	10	0	0	0	0	15	0	0	0	20	Fungi	Ascomycota	Leotiomycetes	unidentified	unidentified	unidentified	unidentified
9c2f1f73c1a1ca105977f52969ce757c	0	21	0	37	0	0	10	0	0	0	0	0	Fungi	Basidiomycota	Agaricomycetes	Agaricales	Lycoperdaceae	Lycoperdon	unidentified
62096c943a7ac9edd97d4cf0cc18f0c1	10	0	0	0	0	0	0	49	0	0	8	0	Fungi	Ascomycota	Eurotiomycetes	Chaetothyriales	Herpotrichiellaceae	Minimelanolocus	unidentified
1ee20fac3fa8f3cfeb7811083ea658fc	8	0	0	13	0	0	17	0	0	0	29	0	Fungi	Ascomycota	Dothideomycetes	Acrospermales	Acrospermales_fam_Incertae_sedis	Leptodiscella	unidentified
5625cc6a8d6504c3428eb56ca614c8f9	45	0	0	0	0	0	0	21	0	0	0	0	Fungi	Ascomycota	Sordariomycetes	Hypocreales	Nectriaceae	Volutella	unidentified
2a1989143f24536a3aa03e5ae738d174	3	0	6	0	0	0	0	42	0	0	0	0	Fungi	Basidiomycota	Microbotryomycetes	Microbotryomycetes_ord_Incertae_sedis	Chrysozymaceae	unidentified	unidentified
69b74b65b21663c949590000e386d561	0	8	0	0	0	0	0	0	0	4	7	15	Fungi	unidentified	unidentified	unidentified	unidentified	unidentified	unidentified
e12cd93dae253a0702a989184d39ae4a	14	0	10	0	0	0	0	0	0	0	18	0	Fungi	Ascomycota	Sordariomycetes	Microascales	unidentified	unidentified	unidentified
64a8f725efd702e9e00fcd57d9f99d78	0	15	13	12	0	0	0	0	0	0	0	0	Fungi	Ascomycota	Sordariomycetes	Microascales	Microascaceae	unidentified	unidentified
764a04364900278c46806b6b4ee2c07f	0	0	5	10	0	0	11	0	0	6	24	0	Fungi	Ascomycota	Sordariomycetes	Xylariales	unidentified	unidentified	unidentified
ae93121206f75dd6e1452ae99b57fdb8	5	0	9	0	0	0	0	0	9	13	0	0	Fungi	Ascomycota	Sordariomycetes	Sordariales	unidentified	unidentified	unidentified
783b47e77fb0b0a762502005024068f2	0	0	11	0	0	7	4	0	6	0	18	0	Fungi	Ascomycota	Leotiomycetes	Helotiales	Helotiaceae	unidentified	unidentified
b893774eda890946a611bfbca94afcea	0	7	0	0	4	0	0	0	0	8	14	8	Fungi	Ascomycota	Dothideomycetes	Pleosporales	unidentified	unidentified	unidentified
9d2581527c0455a357d4c1eb81f76cb5	0	0	13	16	0	0	5	0	0	19	0	8	Fungi	Basidiomycota	Agaricomycetes	Agaricales	Bolbitiaceae	unidentified	unidentified
80e48d9a8a19ae803312ae85f365e2c8	0	0	0	10	0	0	0	0	0	0	12	0	Fungi	Ascomycota	Sordariomycetes	unidentified	unidentified	unidentified	unidentified
ec98e0e2f245db159c622bcd7a837e00	0	0	36	0	24	0	0	0	0	0	0	0	Fungi	Ascomycota	Sordariomycetes	Hypocreales	Nectriaceae	Volutella	unidentified
a322da53d4f779aca55baf3cbfadb936	7	18	11	0	0	0	8	0	0	0	0	15	Fungi	unidentified	unidentified	unidentified	unidentified	unidentified	unidentified
9893758f0c7dd1ac2d9ff65e1fdd8ee9	0	0	0	0	0	20	0	0	0	0	0	39	Fungi	Ascomycota	Sordariomycetes	Coniochaetales	Coniochaetaceae	unidentified	unidentified
2b9d3644b75c2dfa25a6376891bc4d72	16	0	0	33	0	0	0	0	0	0	0	8	Fungi	Basidiomycota	Cystobasidiomycetes	Erythrobasidiales	Erythrobasidiales_fam_Incertae_sedis	Sakaguchia	unidentified
91339097f44c7e52be28fc9f4cb25967	0	0	9	0	0	0	0	0	0	26	22	0	Fungi	Ascomycota	Saccharomycetes	Saccharomycetales	Dipodascaceae	unidentified	unidentified
4bd7b52ae92c957470b6a885a4bfe13a	0	0	0	0	0	9	11	0	0	0	13	12	Fungi	Ascomycota	Sordariomycetes	Sordariales	Chaetomiaceae	unidentified	unidentified
72011e134fcaa6ec998f57705dc44abd	24	11	11	0	0	0	9	0	0	0	0	0	Fungi	Basidiomycota	Agaricomycetes	Agaricales	Psathyrellaceae	Coprinopsis	unidentified
c27dd27ea5c482badb1df019ccb85209	7	7	29	5	0	0	0	0	0	0	0	0	Fungi	Ascomycota	Dothideomycetes	Pleosporales	unidentified	unidentified	unidentified
d5c99084597d6c25334b7cd043233b87	18	0	18	0	0	0	0	0	0	0	0	18	Fungi	Basidiomycota	Agaricomycetes	Agaricales	Lycoperdaceae	Lycoperdon	unidentified
e70090f68e66fe06cc93ee5ab7aef4b2	6	11	7	0	0	0	0	0	0	13	17	0	Fungi	Ascomycota	Orbiliomycetes	Orbiliales	Orbiliales_fam_Incertae_sedis	Vermispora	unidentified
5f387fe47dee4346a111675c49d3cd61	0	2	0	0	0	0	0	5	0	0	0	0	Fungi	unidentified	unidentified	unidentified	unidentified	unidentified	unidentified
a975c324c12d052bbff04ea43979743c	0	0	11	10	0	0	0	0	0	0	17	7	Fungi	Ascomycota	Dothideomycetes	Pleosporales	Dictyosporiaceae	unidentified	unidentified
ab1917a79bf3b3cca26bde6923a00f19	5	14	0	13	0	0	0	0	0	7	0	13	Fungi	Ascomycota	Dothideomycetes	Pleosporales	Dictyosporiaceae	unidentified	unidentified
bd0318fffd5645c81cb2bac5e8ce783f	0	0	9	0	0	0	0	0	0	20	0	10	Fungi	Basidiomycota	Agaricomycetes	Agaricales	Lycoperdaceae	Bovista	unidentified
be1987299c47155106f9e66f168affd7	0	0	0	0	0	4	0	0	0	0	0	30	Fungi	Ascomycota	Laboulbeniomycetes	Pyxidiophorales	Pyxidiophoraceae	Pyxidiophora	Pyxidiophora_arvernensis
506df4a6038ac9e266c8356f47cfd2df	41	0	0	9	0	0	0	0	0	0	0	0	Fungi	Ascomycota	Leotiomycetes	Helotiales	Myxotrichaceae	Oidiodendron	unidentified
e02ad52ba8d121884adc032a5687b445	14	0	0	0	0	0	0	0	0	12	0	11	Fungi	Ascomycota	Sordariomycetes	Microascales	Microascaceae	unidentified	unidentified
c965b3dfe6edf8c7958565b7ea13ff77	9	0	0	0	0	0	0	0	0	34	0	7	Fungi	Basidiomycota	Agaricomycetes	Auriculariales	unidentified	unidentified	unidentified
46631cb354981869d2ac2c3863e58a74	0	45	0	0	0	0	0	0	0	5	0	0	Fungi	Ascomycota	Pezizomycetes	Pezizales	Pyronemataceae	Scutellinia	unidentified
c0e841b3eb39fd15a9917fd15ede12eb	0	6	7	12	7	0	0	0	0	6	0	0	Fungi	Ascomycota	Sordariomycetes	Hypocreales	Clavicipitaceae	unidentified	unidentified
4f96589cc97fb448104ec6b1fc92c768	0	0	0	0	6	4	6	0	7	0	0	8	Fungi	unidentified	unidentified	unidentified	unidentified	unidentified	unidentified
393d9c474b5b365cd5f1f126f8075f34	0	5	0	0	10	2	0	0	0	0	0	31	Fungi	Ascomycota	unidentified	unidentified	unidentified	unidentified	unidentified
cfd89b56306e05f3a99e5dc41a120d98	0	0	5	43	0	0	0	0	0	0	0	0	Fungi	Ascomycota	unidentified	unidentified	unidentified	unidentified	unidentified
c6530631f9c4cc22bee4cb007d4294a4	0	0	0	9	0	0	5	0	0	0	0	0	Fungi	Basidiomycota	Agaricomycetes	Agaricales	Psathyrellaceae	unidentified	unidentified
be3c7d64c134e59e468a3bbd708bf689	0	0	0	0	20	0	0	0	0	0	0	7	Fungi	Ascomycota	Sordariomycetes	Sordariales	Lasiosphaeriaceae	Podospora	unidentified
74618ffaaea9c4051c8a47cf5930421c	3	0	0	6	0	0	0	0	0	0	14	18	Fungi	Mucoromycota	Mucoromycetes	Mucorales	Mucoraceae	Actinomucor	Actinomucor_elegans
03cebaa07c9862a771a3ccf8bf8d0cfb	0	24	0	0	0	0	0	0	0	23	0	0	Fungi	unidentified	unidentified	unidentified	unidentified	unidentified	unidentified
526afdc1d1898a12d7e95b6aeb907636	0	7	0	35	0	5	0	0	0	0	0	0	Fungi	Ascomycota	Sordariomycetes	Glomerellales	Plectosphaerellaceae	unidentified	unidentified
ab17e7b568e50ed5e3baf3778fa7c86f	0	0	14	0	14	0	0	0	0	0	0	0	Fungi	Ascomycota	Sordariomycetes	Sordariales	Lasiosphaeriaceae	unidentified	unidentified
f7e5cfb229c88894d8d2cbf62e8572be	0	0	0	0	17	0	0	0	0	30	0	0	Fungi	Ascomycota	Dothideomycetes	Venturiales	Venturiaceae	unidentified	unidentified
64b9ece41ee471f28aaec96349022d38	0	0	0	0	0	0	4	0	0	0	0	43	Fungi	unidentified	unidentified	unidentified	unidentified	unidentified	unidentified
2f55b497e52358febfce457e6a547fd3	0	0	0	0	0	0	0	0	0	17	30	0	Fungi	Ascomycota	Sordariomycetes	Sordariales	Chaetomiaceae	unidentified	unidentified
2b9e6be577022691882eb1c1d92f2bd1	30	0	0	0	0	0	0	0	0	0	16	0	Fungi	Ascomycota	Sordariomycetes	Sordariales	unidentified	unidentified	unidentified
3cadefd697a0c81e79916c70f3f3e235	11	0	17	0	0	0	0	0	6	0	8	4	Fungi	Ascomycota	Sordariomycetes	Glomerellales	Glomerellaceae	Colletotrichum	unidentified
8434b6beb5f8b000dfe5abaca7012b9d	4	6	0	9	3	0	0	0	0	4	10	10	Fungi	Ascomycota	Lecanoromycetes	unidentified	unidentified	unidentified	unidentified
0e4a04e465febf486d8950fba994c7f6	0	8	0	0	0	0	0	10	0	18	0	0	Fungi	Ascomycota	Sordariomycetes	Sordariales	unidentified	unidentified	unidentified
86013ddb6abe9f88b5e3d19e9d8c720b	0	0	0	0	0	12	0	0	0	0	18	0	Fungi	Ascomycota	Sordariomycetes	Microascales	Microascaceae	unidentified	unidentified
76c18076291f8e60b800dd41bc5ce376	0	0	0	0	0	8	14	2	9	0	0	0	Fungi	Ascomycota	Dothideomycetes	Pleosporales	Lindgomycetaceae	unidentified	unidentified
54a4a09d252d77fd00531a9f00ffbd65	0	0	0	0	0	0	6	0	0	0	23	0	Fungi	Ascomycota	unidentified	unidentified	unidentified	unidentified	unidentified
a8247c8974333538fb05370799198546	0	0	0	7	0	0	0	0	0	10	0	0	Fungi	Ascomycota	Sordariomycetes	Hypocreales	unidentified	unidentified	unidentified
d0e14351250464fa73ad1aba14e172e9	14	0	0	0	0	0	0	0	0	7	0	4	Fungi	Ascomycota	Orbiliomycetes	Orbiliales	Orbiliaceae	unidentified	unidentified
00d0cbc9454a4d44e2a10101ae009474	0	10	0	15	0	0	0	0	0	0	0	0	Fungi	unidentified	unidentified	unidentified	unidentified	unidentified	unidentified
b0f9e96938af17810c251cf8f68b6c4c	0	0	0	23	0	0	0	0	0	0	12	9	Fungi	Ascomycota	Sordariomycetes	Myrmecridiales	Myrmecridiaceae	Myrmecridium	unidentified
58cf5391639cba83a2724635bd2ef903	0	0	0	0	0	26	0	0	0	0	18	0	Fungi	Ascomycota	Sordariomycetes	Hypocreales	Hypocreaceae	Trichoderma	unidentified
1c037e3a29bc3d634b49c1561c81673e	0	0	0	0	0	0	0	0	0	13	0	31	Fungi	unidentified	unidentified	unidentified	unidentified	unidentified	unidentified
0c779367d945abad8fd3688a6a33eb8b	11	32	0	0	0	0	0	0	0	0	0	0	Fungi	Basidiomycota	Agaricomycetes	Agaricales	Psathyrellaceae	unidentified	unidentified
39e98ef0defd77d36dba2eecbb590882	0	18	0	0	0	0	0	0	0	0	25	0	Fungi	Basidiomycota	Pucciniomycetes	unidentified	unidentified	unidentified	unidentified
a98f0594d69cd9faa02fc238e179037f	0	14	0	15	14	0	0	0	0	0	0	0	Fungi	Ascomycota	Eurotiomycetes	Chaetothyriales	Cyphellophoraceae	Cyphellophora	unidentified
38e5877ae6057c9201ef658d4ec6de92	0	0	0	0	0	4	0	0	0	0	19	0	Fungi	Ascomycota	Dothideomycetes	Botryosphaeriales	Botryosphaeriaceae	Dothiorella	unidentified
eab25f63a03fd15b4ea46ca96a4f0959	8	0	8	0	7	0	0	0	0	6	0	0	Fungi	Basidiomycota	Agaricomycetes	Agaricales	Tricholomataceae	unidentified	unidentified
a3fea3b6a4ab785dc6a42adb745376bb	7	0	0	0	0	5	0	0	0	0	0	17	Fungi	Ascomycota	Pezizomycetes	Pezizales	Pyronemataceae	unidentified	unidentified
b90e84339da2e9b6aabccbc4bb142fb5	0	0	11	0	0	0	0	8	0	0	0	0	Fungi	Ascomycota	Orbiliomycetes	Orbiliales	Orbiliaceae	unidentified	unidentified
0a97d5cee12b469789785dd510889992	0	0	8	0	0	0	0	0	4	0	12	8	Fungi	Ascomycota	Eurotiomycetes	Onygenales	unidentified	unidentified	unidentified
efb07451adbc4c5b250db103fbe8e743	0	0	0	0	0	11	0	0	0	11	0	0	Fungi	Ascomycota	Sordariomycetes	Hypocreales	Nectriaceae	Ilyonectria	unidentified
495f7b581be2755a5622ba96d6a4ba07	0	20	0	0	4	0	0	0	0	0	0	0	Fungi	Ascomycota	Dothideomycetes	Tubeufiales	Tubeufiaceae	unidentified	unidentified
db9a56a987d32e12aa916909d434c86a	0	0	0	5	0	0	0	0	20	5	9	0	Fungi	Ascomycota	unidentified	unidentified	unidentified	unidentified	unidentified
0c035fd74df6a618f49aa12d304609ae	0	1	1	7	0	0	5	13	1	3	3	1	Fungi	Ascomycota	Eurotiomycetes	Eurotiales	Aspergillaceae	Penicillium	unidentified
027e4b54ea7863a6d2b125547e695804	0	0	0	0	0	0	0	0	0	11	14	0	Fungi	Ascomycota	Sordariomycetes	Glomerellales	Plectosphaerellaceae	unidentified	unidentified
bafec28d2735b4b46dea35f41898bafb	5	0	0	0	0	16	0	0	0	0	0	0	Fungi	Ascomycota	Dothideomycetes	Pleosporales	unidentified	unidentified	unidentified
aed05409fb7a7e2710761200d31e97e0	3	0	4	0	0	6	3	0	0	6	0	0	Fungi	Ascomycota	Sordariomycetes	Microascales	Microascaceae	unidentified	unidentified
a5e5db988a85cf298b4f4c0326f0f72d	0	6	0	5	17	0	5	0	0	0	0	0	Fungi	Ascomycota	Sordariomycetes	unidentified	unidentified	unidentified	unidentified
26ebdc4bf23b9cc9da1e9069004b4d6c	0	0	33	0	0	0	0	4	0	0	0	0	Fungi	Ascomycota	Saccharomycetes	Saccharomycetales	Phaffomycetaceae	Barnettozyma	unidentified
cbbffcf9628dd982592d9183362c62dd	7	0	0	0	0	0	0	0	0	0	14	0	Fungi	Ascomycota	Sordariomycetes	Xylariales	unidentified	unidentified	unidentified
564af87f05746853210cbac3172f5b53	7	0	3	0	0	0	0	0	0	9	0	0	Fungi	Ascomycota	Orbiliomycetes	Orbiliales	Orbiliales_fam_Incertae_sedis	Vermispora	unidentified
2855ffc22e4839c3cd98815f00e9480a	5	0	5	6	0	5	3	0	0	0	9	0	Fungi	Ascomycota	Sordariomycetes	Chaetosphaeriales	Chaetosphaeriaceae	unidentified	unidentified
b8e78da5bddbeef46dffc1b3fd1d76b2	0	0	0	0	0	0	0	0	0	0	14	19	Fungi	Ascomycota	Pezizomycetes	Pezizales	Pezizaceae	Peziza	unidentified
3bc390d29eab0a48668ed171e3f86e06	0	0	0	0	6	0	0	0	0	0	12	6	Fungi	Ascomycota	Sordariomycetes	Hypocreales	unidentified	unidentified	unidentified
94ccd92195eed4aef70e5ba4ff74c7eb	0	0	0	0	0	0	16	0	0	0	0	16	Fungi	unidentified	unidentified	unidentified	unidentified	unidentified	unidentified
0e433fa753ec0964bd35ef6419f6af05	0	10	0	9	0	0	0	0	0	0	3	0	Fungi	Ascomycota	Dothideomycetes	Pleosporales	unidentified	unidentified	unidentified
7f2b5cd08a7e9f8fbcc4350f11c4297c	0	0	15	0	0	0	0	0	0	0	16	0	Fungi	Ascomycota	Dothideomycetes	Pleosporales	unidentified	unidentified	unidentified
8b43ccc5589eaf003e35a3cec514180a	0	0	10	0	0	21	0	0	0	0	0	0	Fungi	Ascomycota	Sordariomycetes	Microascales	Microascaceae	unidentified	unidentified
7a23f95852d32fa60138307f7e77a6d8	0	0	0	23	0	0	0	0	0	0	3	0	Fungi	Chytridiomycota	unidentified	unidentified	unidentified	unidentified	unidentified
bc1824b3b0c421735c25b2a28fb14e5d	0	0	0	0	0	0	0	0	0	0	8	14	Fungi	Ascomycota	Leotiomycetes	Helotiales	unidentified	unidentified	unidentified
e61c71e9b7c885fcbdcffd7a923014a9	0	8	4	0	0	0	0	0	0	0	0	6	Fungi	Basidiomycota	Agaricostilbomycetes	Agaricostilbales	Chionosphaeraceae	unidentified	unidentified
f6bafa0ded9bb5f4e8cdc89ab33059f4	0	0	0	0	0	0	0	0	0	10	20	0	Fungi	Chytridiomycota	unidentified	unidentified	unidentified	unidentified	unidentified
4126f696565a998a985cfe03f82c47e2	9	0	0	20	0	0	0	0	0	0	0	0	Fungi	Mucoromycota	Mucoromycetes	Mucorales	Cunninghamellaceae	Absidia	Absidia_glauca
5fda3833dc065b39e5a4042e03a6a55e	7	5	0	0	0	0	0	0	0	0	17	0	Fungi	unidentified	unidentified	unidentified	unidentified	unidentified	unidentified
8cb9161edc9d2872fa9af99def9d0334	0	9	0	0	0	0	0	0	0	0	11	0	Fungi	Zoopagomycota	Zoopagomycetes	Zoopagales	unidentified	unidentified	unidentified
85242ce87b312ffe649ea51f73c58902	16	0	0	0	0	0	0	0	0	0	12	0	Fungi	unidentified	unidentified	unidentified	unidentified	unidentified	unidentified
bff6e9c61ddaffce6cb59e1502fedac8	11	17	0	0	0	0	0	0	0	0	0	0	Fungi	Ascomycota	Dothideomycetes	Pleosporales	unidentified	unidentified	unidentified
8180fc7d88f0be4a1719958993641bdd	0	12	0	0	0	0	0	0	0	16	0	0	Fungi	Ascomycota	Sordariomycetes	Sordariales	Lasiosphaeriaceae	unidentified	unidentified
6f7fe1d48f6a1e2de3a64e08d9383560	0	0	10	0	0	0	0	0	11	0	0	0	Fungi	Ascomycota	Sordariomycetes	Sordariales	unidentified	unidentified	unidentified
d7fd968fdf59f33e42937ca7e2aafad3	0	0	0	0	0	0	5	8	0	0	0	7	Fungi	Ascomycota	Dothideomycetes	Pleosporales	Didymellaceae	Neoascochyta	unidentified
5e167804198b11835220b6973ff7591b	0	0	0	0	0	0	0	15	0	0	13	0	Fungi	Ascomycota	Dothideomycetes	Pleosporales	unidentified	unidentified	unidentified
c38a33bd71b9543df372108d27c105bf	0	7	9	0	0	0	0	0	0	0	11	0	Fungi	unidentified	unidentified	unidentified	unidentified	unidentified	unidentified
21acb4511fd4dec6fef2b3f262afad14	0	0	6	0	0	0	21	0	0	0	0	0	Fungi	Ascomycota	Sordariomycetes	Microascales	Halosphaeriaceae	unidentified	unidentified
1072fc0a574bd04a3baf64260df2da8b	0	0	0	5	0	0	5	0	0	0	0	0	Fungi	Ascomycota	Sordariomycetes	Glomerellales	Glomerellaceae	Colletotrichum	unidentified
ea36e410e01468d70bceddab399640d0	16	10	0	0	0	0	0	0	0	0	0	0	Fungi	Ascomycota	Leotiomycetes	Helotiales	unidentified	unidentified	unidentified
e5269e6bfe2160bf755e295cf232d255	0	9	0	0	0	0	0	0	0	0	0	7	Fungi	Basidiomycota	Cystobasidiomycetes	unidentified	unidentified	unidentified	unidentified
f07e55e7a1b80188324cbadc4d017957	0	3	0	23	0	0	0	0	0	0	0	0	Fungi	Ascomycota	Sordariomycetes	Xylariales	Amphisphaeriaceae	unidentified	unidentified
ee7c4603f18199d2d693f7f7236d847f	0	3	0	0	5	0	0	6	0	0	7	0	Fungi	Ascomycota	Sordariomycetes	Ophiostomatales	Ophiostomataceae	Sporothrix	unidentified
695eebe1370a5f39964c642e193cd105	0	0	0	0	9	0	2	0	0	4	0	0	Fungi	Ascomycota	Pezizomycetes	Pezizales	unidentified	unidentified	unidentified
e09871ef521248ff4fa1a9a26b82370b	0	11	0	0	3	0	0	0	3	0	0	0	Fungi	Ascomycota	Eurotiomycetes	Onygenales	Onygenales_fam_Incertae_sedis	unidentified	unidentified
2511694326f2f5ff843fdca74a2cac12	0	0	7	0	0	0	0	0	0	10	0	7	Fungi	Ascomycota	Pezizomycetes	Pezizales	Ascobolaceae	Ascobolus	unidentified
40ed5950215c131eeba62accfb78db5c	0	0	9	0	9	0	0	0	0	5	0	0	Fungi	Ascomycota	Pezizomycetes	Pezizales	Ascodesmidaceae	unidentified	unidentified
d8c6b005d50fb24c842d2c8bb7356312	0	0	0	13	0	0	0	0	0	0	0	5	Fungi	Basidiomycota	Agaricomycetes	Hymenochaetales	Schizoporaceae	Xylodon	unidentified
324e682b0d850036a62f378977917371	0	0	0	0	0	0	0	9	0	5	0	3	Fungi	Ascomycota	Sordariomycetes	Hypocreales	unidentified	unidentified	unidentified
4b0e81203a5902d6120bbe1f6d351c75	0	0	0	0	0	0	0	0	0	0	18	4	Fungi	Ascomycota	Sordariomycetes	Microascales	Microascaceae	unidentified	unidentified
fa8a9a6b6c10ba52999aada6cd708ef4	13	0	0	0	2	0	0	0	0	0	0	0	Fungi	Chytridiomycota	Lobulomycetes	unidentified	unidentified	unidentified	unidentified
7258dc366b29b12411ad13e4f5f020a7	10	0	0	0	3	0	0	0	0	0	0	0	Fungi	Ascomycota	Dothideomycetes	Venturiales	Venturiaceae	unidentified	unidentified
96d39289dc4bab56c6fa6e0ae54b624c	6	0	0	0	0	0	0	0	0	8	0	0	Fungi	Basidiomycota	Agaricomycetes	Agaricales	Strophariaceae	Pholiota	unidentified
ba7b306b6c535edb5703f43cec0875cf	0	5	4	8	0	0	0	0	0	0	0	4	Fungi	Mucoromycota	Mucoromycetes	Mucorales	Rhizopodaceae	Rhizopus	Rhizopus_arrhizus
fd017675254ca9316c318c99c4184883	0	3	14	4	0	0	0	0	0	0	0	0	Fungi	Ascomycota	Saccharomycetes	Saccharomycetales	Phaffomycetaceae	Cyberlindnera	unidentified
5c9a6d3ef8d54fed7c4ce1979e171b2d	0	0	3	10	0	8	0	0	0	0	0	0	Fungi	Ascomycota	Sordariomycetes	Hypocreales	unidentified	unidentified	unidentified
ccd42e8d9e9c6b4259a87ae18b1254b5	0	0	0	0	8	0	5	0	0	0	0	5	Fungi	Ascomycota	Sordariomycetes	Hypocreales	unidentified	unidentified	unidentified
7fecb9dac0a5c95ee47e78e0c0a459c4	0	0	0	0	0	4	0	0	0	17	0	0	Fungi	Ascomycota	Sordariomycetes	Sordariales	Lasiosphaeriaceae	Podospora	unidentified
ae988bbb2935ba397ebffb7a260be8a4	0	0	0	0	0	0	0	4	17	0	0	0	Fungi	Basidiomycota	Agaricomycetes	Sebacinales	Serendipitaceae	unidentified	unidentified
051177ab7eaeb4f2485856556a4d36f1	5	0	0	0	6	9	0	0	0	0	0	0	Fungi	Chytridiomycota	unidentified	unidentified	unidentified	unidentified	unidentified
99f5d2b032bba3c88eef9437735caba2	0	9	0	0	0	0	0	4	0	0	0	0	Fungi	Basidiomycota	Microbotryomycetes	Leucosporidiales	Leucosporidiaceae	Leucosporidium	unidentified
6b2e825ef6c0bae6d448c92c313d8743	0	7	6	0	0	0	0	0	0	0	0	0	Fungi	Ascomycota	Pezizomycetes	Pezizales	Pezizaceae	Peziza	unidentified
5d342c1ffd02b2eaba12e9f20a3be740	0	0	14	5	0	0	0	0	0	0	0	0	Fungi	Ascomycota	Dothideomycetes	Pleosporales	unidentified	unidentified	unidentified
b9ddb6dafeba669df81507783f6bee77	0	11	0	0	0	0	7	0	0	0	0	0	Fungi	Basidiomycota	Agaricomycetes	Trechisporales	Hydnodontaceae	Subulicystidium	unidentified
d713ec987254f17f8e2c44f8e8b595cd	0	0	0	12	0	6	0	0	0	0	0	0	Fungi	Ascomycota	unidentified	unidentified	unidentified	unidentified	unidentified
e09aaadead523713c57fadbf93d4ff9b	0	9	0	8	0	0	0	0	0	0	0	0	Fungi	unidentified	unidentified	unidentified	unidentified	unidentified	unidentified
1e3d3b9e82ec7c3e4e1011db014b28aa	0	0	8	0	9	0	0	0	0	0	0	0	Fungi	Ascomycota	Sordariomycetes	Hypocreales	Stachybotryaceae	unidentified	unidentified
a78c3b45a22c1391b34f6dc5aec61e5d	0	0	0	10	0	0	0	0	0	0	0	7	Fungi	Ascomycota	Sordariomycetes	Sordariales	unidentified	unidentified	unidentified
edeb2f359c5702ddbf37ffc80836306e	0	0	0	5	0	0	0	0	0	0	12	0	Fungi	Glomeromycota	Archaeosporomycetes	Archaeosporales	unidentified	unidentified	unidentified
9eafa6f577c6fd811a017dea12b7384b	7	0	0	0	0	0	0	0	9	0	0	0	Fungi	Ascomycota	Dothideomycetes	Botryosphaeriales	Botryosphaeriaceae	Dothiorella	unidentified
c34564c02b9a855b980a238a1f203557	6	0	0	0	0	0	0	0	0	10	0	0	Fungi	Ascomycota	Sordariomycetes	Hypocreales	Nectriaceae	unidentified	unidentified
d507a6b5ecc5e2edec5c29f07207701d	0	7	0	0	0	0	0	0	0	0	9	0	Fungi	Basidiomycota	Tremellomycetes	Tremellales	unidentified	unidentified	unidentified
1d1bd580ffa7d6a306e9175b40df4a64	0	0	0	0	5	11	0	0	0	0	0	0	Fungi	Basidiomycota	Agaricomycetes	Sebacinales	unidentified	unidentified	unidentified
e69746a192e84c31e8adaff112376047	10	0	0	0	0	0	0	0	0	0	0	5	Fungi	unidentified	unidentified	unidentified	unidentified	unidentified	unidentified
ec95499be201ed98df97dc3687033daa	9	0	0	0	0	0	0	0	6	0	0	0	Fungi	Ascomycota	Dothideomycetes	Pleosporales	Pleosporaceae	Bipolaris	unidentified
c5703d5353083b441f1c81d05a4f57a2	6	0	0	0	0	0	0	0	0	9	0	0	Fungi	Ascomycota	Pezizomycetes	Pezizales	Pyronemataceae	unidentified	unidentified
c283a32348e0e60377144e7ef542f14a	2	0	0	0	0	0	4	0	0	9	0	0	Fungi	Chytridiomycota	unidentified	unidentified	unidentified	unidentified	unidentified
193a20a1d61cd41fa06097ad25932a31	0	9	0	0	0	0	0	5	0	0	0	0	Fungi	Ascomycota	Sordariomycetes	Magnaporthales	Magnaporthaceae	unidentified	unidentified
351881b674d72062f93c249fa3b1a7c8	0	3	6	0	0	0	5	0	0	0	0	0	Fungi	Ascomycota	Leotiomycetes	Helotiales	unidentified	unidentified	unidentified
5ef88d6dba8c045d3cffd1598829b6d1	0	3	2	3	0	0	3	0	0	3	0	0	Fungi	Ascomycota	unidentified	unidentified	unidentified	unidentified	unidentified
8911b70329abb8b188a3939f6c8c3a5b	0	0	6	0	0	0	0	0	0	0	0	4	Fungi	Ascomycota	Dothideomycetes	Capnodiales	Mycosphaerellaceae	Ramularia	unidentified
2ebb3921d84dbe39e002197c17d4abc3	0	0	0	12	0	0	0	0	0	2	0	0	Fungi	Ascomycota	Sordariomycetes	Hypocreales	Ophiocordycipitaceae	unidentified	unidentified
83e7f3cd21ccc9ad8cc21439fa7ef5ca	0	0	0	0	7	0	0	0	0	0	0	7	Fungi	Ascomycota	Sordariomycetes	Microascales	Microascaceae	Microascus	unidentified
c813410bc8a736a703b969be3f19e379	0	0	0	0	6	8	0	0	0	0	0	0	Fungi	unidentified	unidentified	unidentified	unidentified	unidentified	unidentified
1d2df2ccbb9d06e6bc9e4853bbd8c27d	0	0	0	0	0	0	0	0	12	0	0	2	Fungi	Ascomycota	Sordariomycetes	Hypocreales	Stachybotryaceae	unidentified	unidentified
7009d513a2da85af5b477ae1344e2e98	6	0	7	0	0	0	0	0	0	0	0	0	Fungi	Ascomycota	Leotiomycetes	Erysiphales	Erysiphaceae	Blumeria	unidentified
c92a05f0449219362fc3c6654a815865	0	0	5	0	0	0	0	0	0	8	0	0	Fungi	unidentified	unidentified	unidentified	unidentified	unidentified	unidentified
0d4e0f75018713a82742717194cc4e42	0	0	0	4	0	4	0	0	0	0	0	0	Fungi	Ascomycota	unidentified	unidentified	unidentified	unidentified	unidentified
714ec3fb965767da202a626e7b436344	0	0	0	0	0	0	0	5	0	8	0	0	Fungi	Basidiomycota	Agaricomycetes	Agaricales	Psathyrellaceae	Coprinopsis	unidentified
4b9efc2d7fdc92ae6eaa963f2dc7d8ed	0	0	0	0	0	0	0	0	5	8	0	0	Fungi	Ascomycota	Sordariomycetes	Hypocreales	unidentified	unidentified	unidentified
73b338385cf6dddfad38667a287e67d6	0	0	0	0	0	0	0	0	0	3	10	0	Fungi	Ascomycota	Leotiomycetes	Helotiales	unidentified	unidentified	unidentified
9dbb52b1f4309906d3a86a45265c028a	0	5	7	0	0	0	0	0	0	0	0	0	Fungi	unidentified	unidentified	unidentified	unidentified	unidentified	unidentified
dae5900bf04ad045def7774205aa4e8e	0	0	4	0	0	0	0	0	0	0	0	6	Fungi	Ascomycota	Leotiomycetes	Erysiphales	Erysiphaceae	Blumeria	unidentified
f8189fd864c167998c62adc2e578071f	7	4	0	0	0	0	0	0	0	0	0	0	Fungi	Ascomycota	Sordariomycetes	Hypocreales	Hypocreales_fam_Incertae_sedis	Sporidesmium	unidentified
1202e16124899d35e5899ac194de5621	0	7	0	0	0	0	0	0	0	0	0	4	Fungi	Ascomycota	Sordariomycetes	Hypocreales	unidentified	unidentified	unidentified
3d566d54056117d3f5f0880289209f77	0	7	0	0	0	0	0	0	0	0	0	3	Fungi	Ascomycota	Leotiomycetes	unidentified	unidentified	unidentified	unidentified
82974d78032a279a1464f14a848c12b3	0	0	6	0	0	0	0	0	0	4	0	0	Fungi	unidentified	unidentified	unidentified	unidentified	unidentified	unidentified
7c95306b2b70c23c7f863dd322e2182f	0	0	0	7	0	0	0	0	0	3	0	0	Fungi	Ascomycota	Pezizomycetes	Pezizales	Pezizaceae	Peziza	unidentified
ead6ddd50d5c1eb25bbc6b23756bf9b9	4	0	5	0	0	0	0	0	0	0	0	0	Fungi	unidentified	unidentified	unidentified	unidentified	unidentified	unidentified
21d0c70964e08b279451363d87d029aa	0	0	0	0	0	0	0	0	4	0	0	5	Fungi	Ascomycota	Sordariomycetes	Sordariales	Chaetomiaceae	unidentified	unidentified
f6166af5d428d5e8452624503a295d8c	5	0	0	0	0	0	0	0	0	0	0	3	Fungi	Ascomycota	Eurotiomycetes	Chaetothyriales	Cyphellophoraceae	Cyphellophora	unidentified
90d1565d320057eebdb974c8647ffed2	3	0	0	0	0	0	0	0	0	0	5	0	Fungi	Ascomycota	Leotiomycetes	Helotiales	unidentified	unidentified	unidentified
7589e97898f5c796e21f9b43bc42ae73	0	0	4	2	0	0	0	0	0	0	0	0	Fungi	Ascomycota	Dothideomycetes	Pleosporales	Cucurbitariaceae	unidentified	unidentified
fdea854b64abe236ea64c826ecb7c37c	0	0	0	0	2	0	0	4	0	0	0	0	Fungi	Chytridiomycota	unidentified	unidentified	unidentified	unidentified	unidentified
d82cefa1bda77cf1fc7345dba009b4ce	3	0	0	0	0	0	0	2	0	0	0	0	Fungi	unidentified	unidentified	unidentified	unidentified	unidentified	unidentified
