# Supplementary material for: Ammonium fertilization increases the susceptibility to fungal leaf and root pathogens in winter wheat
Source: Front Plant Sci. 2022 Sep 9;13:946584. doi: 10.3389/fpls.2022.946584 (PMC9500508; doi:10.3389/fpls.2022.946584)
Supplement: Supplementary file 2 [file Table_3.XLSX]

## Sheet: Bacterial_dataset
	Ammonium_1	Ammonium_2	Ammonium_3	Kalkstickstoff_1	Kalkstickstoff_2	Kalkstickstoff_3	Nitrat_1	Nitrat_2	Nitrat_3	ohne_Stickstoff_1	ohne_Stickstoff_2	ohne_Stickstoff_3	Kingdom	Phylum	Class	Order	Family	Genus	Species
84653b9572007b4bb11cce5c8f09e404	420	344	438	492	453	477	527	458	585	609	395	499	Bacteria	Actinobacteriota	Actinobacteria	Micrococcales	Micrococcaceae	unidentified	unidentified
7b8e0caaffde1c83cfa8869d490eecb7	279	219	318	274	272	304	381	253	357	254	235	250	Bacteria	Proteobacteria	Alphaproteobacteria	Rhizobiales	Xanthobacteraceae	Bradyrhizobium	unidentified
c4b7d2b128ab70464d2a4ec393d29eb1	197	197	265	339	266	258	319	207	311	204	195	214	Bacteria	Proteobacteria	Alphaproteobacteria	Rhizobiales	Methyloligellaceae	uncultured	metagenome
5c785c1497846bc472833fcf3e83e96e	217	156	264	265	268	277	294	156	298	224	277	270	Bacteria	Acidobacteriota	Blastocatellia	Blastocatellales	Blastocatellaceae	uncultured	unidentified
ae09441e03624020cecba8a12ed491b7	181	179	236	192	197	173	219	208	203	262	171	209	Bacteria	Proteobacteria	Alphaproteobacteria	Rhizobiales	Xanthobacteraceae	Bradyrhizobium	unidentified
9ba031fd43c8e6b4dccdfdec9cfbe490	211	157	233	217	251	218	208	157	171	163	197	240	Bacteria	Gemmatimonadota	Gemmatimonadetes	Gemmatimonadales	Gemmatimonadaceae	uncultured	metagenome
9a7bba1d4981c91d4a25d92a62c3e4bd	160	100	195	213	173	208	236	268	186	195	173	210	Bacteria	Actinobacteriota	MB-A2-108	MB-A2-108	MB-A2-108	MB-A2-108	unidentified
e69d24f544d3f3fd2a5a5a31e5eb7636	174	141	208	232	165	181	221	205	233	157	161	189	Bacteria	Proteobacteria	Alphaproteobacteria	Dongiales	Dongiaceae	Dongia	unidentified
04412a882ae8436cf3c8990ff080c78d	156	105	196	202	219	165	216	166	193	135	168	190	Bacteria	Actinobacteriota	Actinobacteria	Micrococcales	Intrasporangiaceae	unidentified	unidentified
a7ebe51ddbff62e482f027a1ec94e897	127	131	216	140	191	184	187	168	163	162	145	205	Bacteria	Actinobacteriota	Actinobacteria	Micrococcales	Intrasporangiaceae	uncultured	unidentified
198d25778b73763f567570977843fd61	173	122	205	219	132	130	175	139	149	186	149	168	Bacteria	Proteobacteria	Alphaproteobacteria	Rhizobiales	Xanthobacteraceae	unidentified	unidentified
bd789ad7cdc63b9212824108444cd1ae	172	105	199	153	150	188	250	112	164	113	166	155	Bacteria	Gemmatimonadota	Gemmatimonadetes	Gemmatimonadales	Gemmatimonadaceae	uncultured	unidentified
ffd25730fbbad52dee00f1d5e2e137f2	170	90	177	166	151	200	190	95	214	156	149	155	Bacteria	Gemmatimonadota	Gemmatimonadetes	Gemmatimonadales	Gemmatimonadaceae	uncultured	unidentified
bd0cd849006b192dce32fbc54d5d10b3	102	0	472	158	49	64	267	318	0	288	94	27	Bacteria	Bacteroidota	Bacteroidia	Flavobacteriales	Flavobacteriaceae	Flavobacterium	unidentified
65a41f4bc77a62214e8d9601d6112668	78	116	153	188	153	185	173	156	155	154	142	152	Bacteria	Proteobacteria	Alphaproteobacteria	Rhizobiales	Beijerinckiaceae	Microvirga	unidentified
0560ac97d905cdf2196e982c85cd5b07	148	95	172	133	137	138	174	173	115	117	188	155	Bacteria	Gemmatimonadota	Gemmatimonadetes	Gemmatimonadales	Gemmatimonadaceae	Gemmatimonas	unidentified
ea1d8e040396ccf0eca38bf62ac3d8cc	122	100	119	122	113	165	141	138	157	126	105	158	Bacteria	Actinobacteriota	Actinobacteria	Frankiales	Nakamurellaceae	Nakamurella	unidentified
15f39afeecc59ce5958eddea512e650f	124	95	125	127	85	105	155	119	158	123	125	135	Bacteria	Proteobacteria	Alphaproteobacteria	Reyranellales	Reyranellaceae	Reyranella	unidentified
64004d3f0d6433f919537071794d202a	105	80	138	141	114	135	123	108	170	108	109	139	Bacteria	Actinobacteriota	Actinobacteria	Micrococcales	Micrococcaceae	unidentified	unidentified
7f4c4d9d048aabd1975a3318056645ab	87	103	148	119	119	120	128	118	154	105	115	124	Bacteria	Proteobacteria	Alphaproteobacteria	Rhizobiales	Xanthobacteraceae	uncultured	unidentified
34b44d7628f4d18cf8982a38a3f9bd03	74	101	146	112	145	100	135	108	144	143	90	133	Bacteria	Proteobacteria	Alphaproteobacteria	Rhizobiales	Xanthobacteraceae	Bradyrhizobium	unidentified
6ebf6d803c9f861940db9f594db276d6	95	79	98	117	128	135	138	136	131	126	102	138	Bacteria	Actinobacteriota	Actinobacteria	Propionibacteriales	Nocardioidaceae	unidentified	unidentified
9e272e0bac73ffe8ed5b7bd5356bae47	111	96	133	90	142	106	170	106	117	104	123	119	Bacteria	Gemmatimonadota	Gemmatimonadetes	Gemmatimonadales	Gemmatimonadaceae	unidentified	unidentified
080536270b75e42a1eb15419205676dc	110	89	142	110	106	78	148	121	131	127	84	118	Bacteria	Proteobacteria	Alphaproteobacteria	Rhizobiales	Xanthobacteraceae	Rhodoplanes	uncultured_Rhodoplanes
40eb49ac55353ce0065a9c1954974805	95	83	137	108	116	115	114	115	126	94	81	106	Bacteria	Proteobacteria	Alphaproteobacteria	Rhizobiales	Beijerinckiaceae	Microvirga	unidentified
240b59c2fdc83368a24a7f070dc92953	88	75	115	91	91	138	137	71	117	97	111	125	Bacteria	Actinobacteriota	Actinobacteria	Micrococcales	Intrasporangiaceae	unidentified	unidentified
131dc48df142cd524a4d714dcfd9d1cb	109	89	118	90	120	113	117	98	74	125	87	88	Bacteria	Proteobacteria	Alphaproteobacteria	Azospirillales	Azospirillaceae	Skermanella	unidentified
127d08db07215810f030360e92e417a0	115	119	107	66	79	100	110	89	87	100	90	118	Bacteria	Proteobacteria	Alphaproteobacteria	Azospirillales	Azospirillaceae	Skermanella	unidentified
78d00c42e05cd373cba10dc129bb1389	87	74	98	88	110	92	165	100	104	105	0	121	Bacteria	Gemmatimonadota	Gemmatimonadetes	Gemmatimonadales	Gemmatimonadaceae	uncultured	unidentified
ffd216023bf70ab044f42615d6e59235	101	67	106	86	116	131	95	66	137	66	86	83	Bacteria	Gemmatimonadota	Gemmatimonadetes	Gemmatimonadales	Gemmatimonadaceae	uncultured	unidentified
2c714b7b963fcd0faf9f19c48b2766ba	112	121	85	58	97	92	110	78	88	101	87	91	Bacteria	Actinobacteriota	Actinobacteria	Frankiales	Geodermatophilaceae	Blastococcus	unidentified
cc182e524894cb562b65fa7b041149a5	81	63	108	134	83	96	120	97	99	70	89	65	Bacteria	Chloroflexi	KD4-96	KD4-96	KD4-96	KD4-96	unidentified
767588bbbace0d5891d42ae0f8e0373a	75	74	95	110	114	112	82	77	72	97	98	77	Bacteria	Actinobacteriota	Actinobacteria	Propionibacteriales	Propionibacteriaceae	unidentified	unidentified
266e32a3f0cea5149845ad2481b1c164	100	58	81	73	107	116	99	67	132	72	84	88	Bacteria	Actinobacteriota	Actinobacteria	Propionibacteriales	Nocardioidaceae	Nocardioides	Nocardioides_ungokensis
7f41d7c40d1dc04dfc4418fb84c4e354	87	88	98	91	144	124	89	34	82	48	103	58	Bacteria	Acidobacteriota	Holophagae	Subgroup_7	Subgroup_7	Subgroup_7	unidentified
b46a019d0b56c508ba39ec9867415af7	75	67	85	91	108	98	79	102	96	86	60	93	Bacteria	Actinobacteriota	Actinobacteria	Propionibacteriales	Nocardioidaceae	Kribbella	unidentified
15a605d3e7afeba086584bb78d88d849	108	50	120	42	86	68	88	96	90	90	75	116	Bacteria	Proteobacteria	Alphaproteobacteria	Sphingomonadales	Sphingomonadaceae	Altererythrobacter	unidentified
7c6106061b043cb6a77ea660c98925e4	105	86	54	68	100	91	96	74	115	43	114	77	Bacteria	Acidobacteriota	Holophagae	Subgroup_7	Subgroup_7	Subgroup_7	unidentified
42d76cd3b5f5bb0ed566ec1e8b48f5d1	64	61	103	82	81	70	105	80	96	86	74	90	Bacteria	Proteobacteria	Alphaproteobacteria	Rhizobiales	Xanthobacteraceae	unidentified	unidentified
00c001080753c0e092ad5ce058fd436c	54	54	106	67	103	72	90	85	104	96	60	80	Bacteria	Actinobacteriota	Actinobacteria	Propionibacteriales	Nocardioidaceae	Nocardioides	unidentified
f7746a08cacf3a095f7ca4773e1f04d4	56	59	81	85	93	84	105	96	65	57	76	98	Bacteria	Chloroflexi	KD4-96	KD4-96	KD4-96	KD4-96	uncultured_bacterium
a5bdfd43dedfaf4750b98473e174258f	63	56	107	80	63	70	88	54	115	74	74	99	Bacteria	Actinobacteriota	Actinobacteria	Micrococcales	Microbacteriaceae	Agromyces	unidentified
fbcf25a5a8c62b256cb22007247b29b8	67	57	90	75	86	115	82	42	88	65	82	93	Bacteria	Gemmatimonadota	Gemmatimonadetes	Gemmatimonadales	Gemmatimonadaceae	uncultured	unidentified
a9b4bee09c8a682282c83d416b244c2e	43	47	115	58	118	69	89	44	90	61	93	104	Bacteria	Proteobacteria	Alphaproteobacteria	Caulobacterales	Caulobacteraceae	Brevundimonas	unidentified
e625ff6dc246beb3479eb152437ec89f	64	52	82	107	91	94	109	31	118	63	54	65	Bacteria	Chloroflexi	Anaerolineae	Anaerolineales	Anaerolineaceae	UTCFX1	unidentified
26b11d2f474dc41c12d7113d02c5bdd5	72	52	84	65	63	86	81	57	119	72	70	96	Bacteria	Actinobacteriota	Actinobacteria	Micrococcales	Intrasporangiaceae	Intrasporangium	uncultured_Terrabacter
3be7afa06134945fc22f19828db565b0	75	51	74	93	82	80	90	85	108	57	57	58	Bacteria	Actinobacteriota	MB-A2-108	MB-A2-108	MB-A2-108	MB-A2-108	metagenome
48b9c1904b6b6a9eeccf387076260be7	95	38	62	91	24	76	98	102	101	77	84	28	Bacteria	Actinobacteriota	Actinobacteria	Frankiales	Nakamurellaceae	Nakamurella	uncultured_Nakamurellaceae
c9c453569eb3f02f702d06b32fe085b4	84	66	63	60	69	113	89	40	92	66	59	68	Bacteria	Chloroflexi	Chloroflexia	Chloroflexales	Roseiflexaceae	uncultured	uncultured_bacterium
1989cfd4ddb08618a7467ebd9a08ccdb	65	40	53	92	93	97	78	35	71	65	84	83	Bacteria	Gemmatimonadota	Gemmatimonadetes	Gemmatimonadales	Gemmatimonadaceae	uncultured	unidentified
29634334d6be1e18ee353fb630b4a195	45	66	86	59	77	64	88	48	86	87	87	63	Bacteria	Acidobacteriota	Blastocatellia	Blastocatellales	Blastocatellaceae	unidentified	unidentified
075666af82e4bce0b660a0a565b7987d	72	59	75	69	92	64	77	72	87	54	59	65	Bacteria	Actinobacteriota	Actinobacteria	Micrococcales	Intrasporangiaceae	unidentified	unidentified
843ebbfbb7c53ffd395500f0b6d0a1f6	39	47	74	72	71	71	90	64	90	60	67	96	Bacteria	Chloroflexi	KD4-96	KD4-96	KD4-96	KD4-96	uncultured_bacterium
2c81a88e7befdceb83ab339884dec686	72	33	77	75	79	84	92	69	64	49	73	72	Bacteria	Actinobacteriota	unidentified	unidentified	unidentified	unidentified	unidentified
948ce282f5fb28c6d651c72dbe82e1e5	62	59	93	68	70	82	74	70	77	47	70	63	Bacteria	Proteobacteria	Alphaproteobacteria	Tistrellales	Geminicoccaceae	Candidatus_Alysiosphaera	metagenome
30e0cba0f950f32bbe097ee4d1a7ea05	61	62	85	54	59	57	94	55	72	83	88	46	Bacteria	Acidobacteriota	Blastocatellia	Blastocatellales	Blastocatellaceae	unidentified	unidentified
8118fc3f6ad445d8dfe52bea57c4c27a	71	39	100	84	50	61	103	44	61	69	60	69	Bacteria	Acidobacteriota	Blastocatellia	11-24	11-24	11-24	uncultured_bacterium
5b0a149883c34a1f08af4e6b26ad6778	65	47	59	75	95	61	67	99	55	58	47	72	Bacteria	Actinobacteriota	Actinobacteria	Propionibacteriales	Nocardioidaceae	Nocardioides	unidentified
78e957a8a41808103342aa6f5d5013a2	63	48	67	50	81	77	61	55	101	46	62	68	Bacteria	Actinobacteriota	Actinobacteria	Propionibacteriales	Nocardioidaceae	unidentified	unidentified
2d386e012efe5803772f73b2e2a09459	50	58	61	67	77	70	65	52	69	66	71	70	Bacteria	Actinobacteriota	Actinobacteria	Propionibacteriales	Nocardioidaceae	unidentified	unidentified
76f8e2a9e4553dd44efe286edfc405d2	55	59	106	100	53	48	71	60	98	47	0	71	Bacteria	Bacteroidota	Bacteroidia	Flavobacteriales	Flavobacteriaceae	Flavobacterium	unidentified
2195e4cc89c0399a5c61595a44b40372	52	49	63	101	68	62	71	61	66	55	54	64	Bacteria	Proteobacteria	Alphaproteobacteria	Rhizobiales	Methyloligellaceae	uncultured	unidentified
769515a9ff59edd422b33dfea9bb4da2	66	44	60	75	43	57	88	64	64	47	55	90	Bacteria	Chloroflexi	KD4-96	KD4-96	KD4-96	KD4-96	uncultured_bacterium
b84ace122e6ac4b1b30e9562c9a2491b	49	32	72	90	64	56	69	68	42	61	79	67	Bacteria	Acidobacteriota	Subgroup_5	Subgroup_5	Subgroup_5	Subgroup_5	uncultured_bacterium
b19e9b3c29ee6d48b9165f2ae64c88d1	83	57	41	63	64	48	49	55	76	91	49	60	Bacteria	Actinobacteriota	Actinobacteria	Micromonosporales	Micromonosporaceae	Actinoplanes	Actinoplanes_violaceus
5dad5469441492adb99e69a2f022c12d	41	0	65	63	78	111	71	55	62	55	64	55	Bacteria	Actinobacteriota	Actinobacteria	Propionibacteriales	Nocardioidaceae	unidentified	unidentified
49b994c30c5bd9ab059e0eee66c596a5	63	49	68	58	86	49	42	56	50	64	50	79	Bacteria	Actinobacteriota	Actinobacteria	Micrococcales	Microbacteriaceae	Microbacterium	unidentified
367bb99fc2e2fc5ea8f280a5f06fb78e	48	48	43	82	69	60	67	71	55	56	57	55	Bacteria	Actinobacteriota	Actinobacteria	Propionibacteriales	Propionibacteriaceae	Microlunatus	unidentified
b10b2ce4182aa4b7b9dc146d1031b05d	0	187	283	0	0	0	0	0	0	0	0	241	Bacteria	Actinobacteriota	Actinobacteria	Propionibacteriales	Nocardioidaceae	Nocardioides	unidentified
7c2244f8f5aef4aa070d035fec97f8d6	61	42	45	67	74	61	63	40	84	50	54	69	Bacteria	Actinobacteriota	Actinobacteria	Propionibacteriales	Nocardioidaceae	unidentified	unidentified
0691e1df825248d06519c97067c6d405	67	48	0	61	63	93	77	72	46	47	69	65	Bacteria	Actinobacteriota	Actinobacteria	Propionibacteriales	Nocardioidaceae	Nocardioides	uncultured_bacterium
49ff182b60cf1466f600e4e6522de6f9	39	38	65	78	67	52	73	56	59	49	52	80	Bacteria	Proteobacteria	Alphaproteobacteria	Rhizobiales	Xanthobacteraceae	Pseudorhodoplanes	unidentified
8e9ebd4ba5637ae64c8f4f1a88e1637e	54	38	63	76	44	64	81	48	61	52	54	68	Bacteria	Chloroflexi	KD4-96	KD4-96	KD4-96	KD4-96	uncultured_bacterium
69ee73d0eb62b87e15204ee2a5583c6c	49	54	44	63	68	55	63	70	75	64	46	49	Bacteria	Actinobacteriota	Actinobacteria	Propionibacteriales	Nocardioidaceae	Nocardioides	unidentified
900c03cfe6c746d64c6c3bb764b6b2d4	53	52	50	72	61	74	72	0	73	53	67	66	Bacteria	Acidobacteriota	Blastocatellia	Blastocatellales	Blastocatellaceae	uncultured	unidentified
cb9aa6d0d002570bacef4d7f10e48ede	58	36	79	54	58	64	70	47	56	54	44	72	Bacteria	Proteobacteria	Alphaproteobacteria	Rhizobiales	Xanthobacteraceae	uncultured	unidentified
728ba2983af345c2b6cfa0ac1fe64fd6	85	0	45	55	60	83	38	56	61	67	69	70	Bacteria	Actinobacteriota	Actinobacteria	Pseudonocardiales	Pseudonocardiaceae	Pseudonocardia	uncultured_bacterium
0dc8bc90f2afb334a35c75c384a004f1	0	49	72	70	64	64	62	49	86	54	57	59	Bacteria	Actinobacteriota	Actinobacteria	Pseudonocardiales	Pseudonocardiaceae	Pseudonocardia	uncultured_bacterium
3ab80cce94ab862a081fcef42b7b0857	72	60	44	95	73	51	78	0	84	63	0	53	Bacteria	Chloroflexi	Gitt-GS-136	Gitt-GS-136	Gitt-GS-136	Gitt-GS-136	unidentified
06d35b222e0605de20b3dcf2c9ee65ae	22	50	69	66	25	87	66	58	89	67	17	53	Bacteria	Actinobacteriota	Actinobacteria	Propionibacteriales	Nocardioidaceae	unidentified	unidentified
5fbc9b341323791d49fee9b4db75a0f7	73	29	42	145	55	33	70	45	33	49	49	43	Bacteria	Actinobacteriota	Actinobacteria	Micromonosporales	Micromonosporaceae	Actinoplanes	unidentified
0f05262ff92027ea0b3ed0acb896a29f	49	41	66	78	58	54	62	36	67	65	38	52	Bacteria	Proteobacteria	Alphaproteobacteria	Rhizobiales	Rhizobiaceae	Ensifer	unidentified
ddebbc0b3e84fa25e2193aef5afa42cb	53	41	58	49	73	56	59	27	84	52	55	53	Bacteria	Chloroflexi	Chloroflexia	Chloroflexales	Roseiflexaceae	uncultured	uncultured_bacterium
dde07f3615c410240056a0821ff9e400	74	29	63	50	46	36	75	48	61	59	49	69	Bacteria	Acidobacteriota	Blastocatellia	Blastocatellales	Blastocatellaceae	unidentified	unidentified
70ff5cf23ff9c111e516df9d77b2dcc9	54	42	0	60	86	79	64	62	29	53	62	62	Bacteria	Actinobacteriota	Actinobacteria	Propionibacteriales	Nocardioidaceae	Nocardioides	uncultured_bacterium
d99625a889179a79b73f99aaa959d5d2	61	46	94	0	0	42	81	88	60	70	68	42	Bacteria	Actinobacteriota	Actinobacteria	Micromonosporales	Micromonosporaceae	Rhizocola	uncultured_bacterium
f9d161af73954a68def9574b5e8dffe9	48	48	58	54	67	58	53	55	49	38	68	56	Bacteria	Gemmatimonadota	Gemmatimonadetes	Gemmatimonadales	Gemmatimonadaceae	uncultured	unidentified
14fb02c5bfed3c4eec6582f51e37eec8	0	0	74	90	71	73	100	79	91	0	0	65	Bacteria	Proteobacteria	Alphaproteobacteria	Rhizobiales	Methyloligellaceae	uncultured	metagenome
8aba2fdf12fed7e56531dde4e8fdfb34	34	43	78	61	45	59	68	32	49	47	49	74	Bacteria	Chloroflexi	KD4-96	KD4-96	KD4-96	KD4-96	uncultured_bacterium
0662305ec808001c2c9772209f8bf7b9	37	31	76	74	48	50	56	42	55	59	51	58	Bacteria	Actinobacteriota	Actinobacteria	Micrococcales	Microbacteriaceae	Agromyces	glacial_ice
6ffe841f95214c22d26ad0ed33ed71bf	33	42	58	33	66	73	67	39	57	65	47	55	Bacteria	Proteobacteria	Alphaproteobacteria	Sphingomonadales	Sphingomonadaceae	Sphingomonas	unidentified
2cd8dd3861407ea906b26eccc6a7545f	65	24	64	48	63	37	58	43	63	52	68	44	Bacteria	Bacteroidota	Kapabacteria	Kapabacteriales	Kapabacteriales	Kapabacteriales	uncultured_bacterium
f7e31bce276a3a918ccf159972c225dd	41	35	46	52	41	66	50	47	68	64	43	75	Bacteria	Actinobacteriota	Actinobacteria	Micrococcales	Micrococcaceae	unidentified	unidentified
b1f2666a1ed15195cf3a0b5dd1ab0e4f	0	66	80	0	87	96	0	64	74	0	67	93	Bacteria	Proteobacteria	Alphaproteobacteria	Azospirillales	Azospirillaceae	Skermanella	unidentified
acff6a8aec4ea7d9031893b87579faca	67	41	49	39	47	52	61	59	65	48	46	48	Bacteria	Bacteroidota	Bacteroidia	Cytophagales	Hymenobacteraceae	Adhaeribacter	uncultured_soil
56b8c477e747b72078e1bcbea964d6f7	48	35	66	47	66	45	55	47	47	54	51	58	Bacteria	Actinobacteriota	Actinobacteria	Micrococcales	Microbacteriaceae	Microbacterium	unidentified
76096d3c873c7d4795e0a4954c5489a6	70	39	48	59	52	59	71	51	34	32	48	51	Bacteria	Bacteroidota	Bacteroidia	Cytophagales	Hymenobacteraceae	Adhaeribacter	Adhaeribacter_terrae
a0ccf29a57997153a8e0be3b10423602	53	0	71	64	95	69	69	67	66	0	0	60	Bacteria	Actinobacteriota	Actinobacteria	FFCH16263	FFCH16263	FFCH16263	uncultured_bacterium
c4ed27ac1090279ce29b3b8764863e49	63	25	70	74	49	50	64	45	58	0	57	50	Bacteria	Chloroflexi	P2-11E	P2-11E	P2-11E	P2-11E	uncultured_bacterium
145d86a04c24f7f6ec6e9de92bb60bcb	48	41	45	63	42	59	58	59	64	41	38	46	Bacteria	Cyanobacteria	Cyanobacteriia	Chloroplast	Chloroplast	Chloroplast	unidentified
53aa8a0c0415a26e564a3b4df10d37c0	54	40	59	60	58	50	72	37	68	32	29	43	Bacteria	Proteobacteria	Alphaproteobacteria	Azospirillales	uncultured	uncultured	unidentified
9b740b5edf0ab4082f1c4baff2044e9f	61	32	49	59	48	51	46	62	48	41	58	44	Bacteria	Gemmatimonadota	Gemmatimonadetes	Gemmatimonadales	Gemmatimonadaceae	uncultured	unidentified
32f7b5f3141328d988cc43a2fbd1ba74	48	31	60	56	55	49	58	40	43	45	52	61	Bacteria	Gemmatimonadota	Gemmatimonadetes	Gemmatimonadales	Gemmatimonadaceae	unidentified	unidentified
df1a1bc0fdbf233c3123b8efe10ee735	41	48	50	54	54	50	54	59	66	31	42	47	Bacteria	Proteobacteria	Alphaproteobacteria	Tistrellales	Geminicoccaceae	Candidatus_Alysiosphaera	metagenome
eb7e71851519e93c979334ee52ac0ba1	48	49	60	40	38	60	60	32	44	55	61	46	Bacteria	Proteobacteria	Alphaproteobacteria	Sphingomonadales	Sphingomonadaceae	Sphingomonas	unidentified
d1f98a87190e58fe1cc52057ea80913f	0	0	47	40	50	77	41	56	46	127	49	60	Bacteria	Actinobacteriota	Actinobacteria	Frankiales	Geodermatophilaceae	Blastococcus	unidentified
4a883daad5c7ab6e6336f0b36ea3d5f9	46	45	65	51	56	47	64	50	39	36	37	52	Bacteria	Acidobacteriota	Blastocatellia	Blastocatellales	Blastocatellaceae	uncultured	unidentified
e6de83b6f4cc1ac5e284d873e010402c	22	54	63	70	60	68	49	17	40	20	61	59	Bacteria	Actinobacteriota	Actinobacteria	Propionibacteriales	Nocardioidaceae	Nocardioides	Nocardioides_halotolerans
0a5deee6d95a42c920b4ae293380d618	43	27	50	37	51	31	75	64	38	46	57	62	Bacteria	Proteobacteria	Alphaproteobacteria	Sphingomonadales	Sphingomonadaceae	Altererythrobacter	unidentified
ea2e3bce7c7cfb988675d6dec36a035e	74	53	0	0	92	74	91	0	70	0	55	68	Bacteria	Actinobacteriota	Actinobacteria	Micrococcales	Intrasporangiaceae	Oryzihumus	Oryzihumus_terrae
5e50cf0180305d2fc6609933cb0d31cb	43	0	62	73	39	65	58	47	41	39	45	63	Bacteria	Acidobacteriota	Subgroup_11	Subgroup_11	Subgroup_11	Subgroup_11	uncultured_bacterium
a9ed37c6c84b61b198ec88bc467e3f3d	35	25	50	40	67	61	46	51	61	57	36	43	Bacteria	Actinobacteriota	Actinobacteria	Propionibacteriales	Propionibacteriaceae	Microlunatus	metagenome
a0c22f3f3f7ba66b992c4e52f8981cfb	46	31	48	44	70	37	55	41	90	24	37	47	Bacteria	Bacteroidota	Bacteroidia	Chitinophagales	Saprospiraceae	uncultured	unidentified
912c181c933b569a86417e21703eb1f5	44	37	64	81	39	50	46	48	56	34	32	37	Bacteria	Actinobacteriota	Actinobacteria	Propionibacteriales	Propionibacteriaceae	Microlunatus	unidentified
486a3d04a3aa3d84c5b9c3f2aa301730	34	38	58	59	57	54	58	41	67	18	38	46	Bacteria	Chloroflexi	Ktedonobacteria	C0119	C0119	C0119	uncultured_bacterium
c1747d09fa4b01127f06c07d95fa8d89	37	45	40	51	37	64	50	61	59	36	42	45	Bacteria	Acidobacteriota	Subgroup_5	Subgroup_5	Subgroup_5	Subgroup_5	uncultured_bacterium
e35254cacedc5fcf2370b1c85538dcb7	47	62	76	73	0	92	0	68	77	67	0	0	Bacteria	Actinobacteriota	Actinobacteria	Pseudonocardiales	Pseudonocardiaceae	Pseudonocardia	uncultured_bacterium
07dca5cb59578c7dccbda421542f5d63	40	30	49	41	51	35	62	50	69	35	41	55	Bacteria	Actinobacteriota	Actinobacteria	Propionibacteriales	Nocardioidaceae	Marmoricola	uncultured_bacterium
fb1c6cb18bb1b2fdb0fdd1bd408e1285	42	36	74	57	52	35	60	33	41	36	40	50	Bacteria	Actinobacteriota	Acidimicrobiia	Microtrichales	Ilumatobacteraceae	uncultured	unidentified
701b125d06eff9ed68e3eb6a5cb5ab6d	39	36	55	56	40	35	66	56	63	41	27	42	Bacteria	Proteobacteria	Alphaproteobacteria	Rhizobiales	Rhizobiaceae	Mesorhizobium	unidentified
c7a69d4b6071b965b219cb0d0de76f7c	34	45	31	36	70	34	63	43	63	42	48	45	Bacteria	Actinobacteriota	Actinobacteria	Propionibacteriales	Nocardioidaceae	Marmoricola	unidentified
ff5b8aa5f968df833eac39e9d46683ec	52	44	0	55	68	40	62	40	65	37	46	44	Bacteria	Proteobacteria	Alphaproteobacteria	Caulobacterales	Caulobacteraceae	unidentified	unidentified
d6286a3aa0a495f746945a49d706f0c7	56	32	41	47	41	43	63	37	62	43	40	46	Bacteria	Chloroflexi	Anaerolineae	Anaerolineales	Anaerolineaceae	UTCFX1	uncultured_bacterium
04237379f1f4816cff9df1908cfa4bb6	38	41	53	56	54	64	81	30	0	68	0	62	Bacteria	Actinobacteriota	Actinobacteria	Micrococcales	Microbacteriaceae	Agromyces	unidentified
62fecf5f055553edf5f7e3be8af4f7cb	52	27	64	44	41	48	45	24	82	45	33	41	Bacteria	Bacteroidota	Bacteroidia	Chitinophagales	Saprospiraceae	uncultured	unidentified
03b2a2b0d0593b6d8a70223ef30c2b12	35	38	49	38	44	47	58	40	49	42	55	50	Bacteria	Actinobacteriota	Actinobacteria	Pseudonocardiales	Pseudonocardiaceae	Pseudonocardia	uncultured_bacterium
cb6390dce1c32173a9e18cb9f4ccb374	49	21	40	33	67	41	44	59	60	37	44	49	Bacteria	Actinobacteriota	Actinobacteria	Propionibacteriales	Nocardioidaceae	Marmoricola	unidentified
b1fd567cd3726f0fdf62680c0c782f3e	60	28	57	39	53	40	59	45	54	34	36	35	Bacteria	Bacteroidota	Bacteroidia	Cytophagales	Hymenobacteraceae	Adhaeribacter	uncultured_soil
57981c378df5557a568afb0978e5fe1d	45	55	53	31	44	51	49	48	42	36	36	47	Bacteria	Actinobacteriota	Actinobacteria	Frankiales	Geodermatophilaceae	Blastococcus	unidentified
367a78aa77b7e59ef61efb2ef58133fc	0	91	48	21	72	29	52	27	78	57	33	29	Bacteria	Proteobacteria	Alphaproteobacteria	Caulobacterales	Caulobacteraceae	Caulobacter	unidentified
3cfd097c018df9504f1dc9821b8a1eef	42	36	35	40	38	65	47	25	57	44	45	59	Bacteria	Actinobacteriota	Actinobacteria	Pseudonocardiales	Pseudonocardiaceae	Pseudonocardia	uncultured_bacterium
9846bcc6ff5c8d44243cf6484b0b9086	0	49	79	0	74	0	77	0	80	0	97	77	Bacteria	Gemmatimonadota	Gemmatimonadetes	Gemmatimonadales	Gemmatimonadaceae	uncultured	unidentified
641123ac986f16502a9307053ac6d57b	40	37	43	60	52	42	37	43	49	30	47	52	Bacteria	Proteobacteria	Alphaproteobacteria	Rhizobiales	Hyphomicrobiaceae	Hyphomicrobium	unidentified
9e51c93f39ed4c9bca734c4ec0c2d9b3	37	21	49	54	40	37	45	52	54	50	41	49	Bacteria	Proteobacteria	Alphaproteobacteria	Rhizobiales	Xanthobacteraceae	Pseudolabrys	unidentified
a838df09e61039b634f83c9414586fb4	60	24	47	36	32	52	47	44	59	33	35	56	Bacteria	Actinobacteriota	Actinobacteria	Frankiales	Nakamurellaceae	Nakamurella	unidentified
2d874954c905673c9267b99951bc0d4c	45	39	53	53	27	55	58	37	39	38	46	33	Bacteria	Firmicutes	Clostridia	Peptostreptococcales-Tissierellales	Peptostreptococcaceae	unidentified	unidentified
56360fd05d8ef7325d0a09b9afb3c025	50	40	59	45	54	42	26	50	43	36	51	25	Bacteria	Chloroflexi	KD4-96	KD4-96	KD4-96	KD4-96	uncultured_bacterium
a465616029daebee0651c94e926ad271	25	25	39	43	23	29	33	0	27	41	192	44	Bacteria	Actinobacteriota	Actinobacteria	Micrococcales	Microbacteriaceae	Cryobacterium	Cryobacterium_arcticum
7ab64e5e2f32de2c69393fea664fedc6	45	27	44	47	35	52	45	38	41	56	49	38	Bacteria	Proteobacteria	Alphaproteobacteria	Tistrellales	Geminicoccaceae	Candidatus_Alysiosphaera	unidentified
6ad3fc980c62ebf1799227e1e3dd2dea	57	45	71	40	62	40	38	38	64	0	57	0	Bacteria	Proteobacteria	Alphaproteobacteria	Sphingomonadales	Sphingomonadaceae	Altererythrobacter	unidentified
f2406a5efc4f57511d01bb6be6794e78	36	19	60	64	45	44	26	24	62	30	38	63	Bacteria	Actinobacteriota	Actinobacteria	Streptomycetales	Streptomycetaceae	Streptomyces	unidentified
42fcee8d10d4330b74389a107115aef3	32	33	41	45	44	40	52	48	52	32	43	48	Bacteria	Chloroflexi	Gitt-GS-136	Gitt-GS-136	Gitt-GS-136	Gitt-GS-136	unidentified
daf8d1b00143d3a6492a641f24583cd2	42	31	24	64	60	53	40	30	57	31	43	34	Bacteria	Proteobacteria	Alphaproteobacteria	Rhizobiales	Rhizobiales_Incertae_Sedis	Nordella	unidentified
007a857ed7502871507212a11734072d	39	21	36	49	44	42	62	39	58	36	44	37	Bacteria	Actinobacteriota	Actinobacteria	Pseudonocardiales	Pseudonocardiaceae	Pseudonocardia	uncultured_bacterium
bc28657cf1216713f503b24ba37e7509	0	0	47	74	38	32	62	50	60	33	64	47	Bacteria	Chloroflexi	Gitt-GS-136	Gitt-GS-136	Gitt-GS-136	Gitt-GS-136	unidentified
f99097dea20e9b0a80e8b567059cdcff	66	0	0	70	27	47	80	67	47	51	0	50	Bacteria	Cyanobacteria	Cyanobacteriia	Chloroplast	Chloroplast	Chloroplast	Bacillaria_paxillifer
485b0cd232a19edf2bedadd5a96fc8ba	28	38	54	48	48	57	48	35	56	48	0	45	Bacteria	Proteobacteria	Alphaproteobacteria	Rhizobiales	Beijerinckiaceae	Microvirga	unidentified
f0ce0a403898465a035ed3029981714f	26	41	46	39	29	40	47	56	43	31	45	58	Bacteria	Gemmatimonadota	Gemmatimonadetes	Gemmatimonadales	Gemmatimonadaceae	Gemmatimonas	unidentified
258332dcd4db7df4286d74006f294272	54	28	45	34	35	42	46	28	49	40	41	58	Bacteria	Acidobacteriota	Blastocatellia	Blastocatellales	Blastocatellaceae	unidentified	unidentified
c62d1661da3efecc779ed9ad7687b17f	0	0	67	55	58	37	57	56	62	45	0	60	Bacteria	Proteobacteria	Alphaproteobacteria	Tistrellales	Geminicoccaceae	Candidatus_Alysiosphaera	metagenome
d8d66705b2eb87f7d234d9896285af4a	47	0	37	56	41	57	58	36	39	32	36	54	Bacteria	Actinobacteriota	Actinobacteria	Propionibacteriales	Nocardioidaceae	unidentified	unidentified
58ebd696ffde5b3ef13bb825c0924b46	45	41	54	29	43	51	33	24	42	39	42	49	Bacteria	Acidobacteriota	Blastocatellia	Blastocatellales	Blastocatellaceae	Stenotrophobacter	uncultured_soil
5742babe66efc53a2fd12f5c184192f0	37	23	54	36	52	38	37	44	41	68	30	32	Bacteria	Actinobacteriota	Actinobacteria	Propionibacteriales	Nocardioidaceae	Nocardioides	Nocardioides_cavernae
60dc13bc84025b483c4c511d074eae89	39	34	42	66	47	39	33	48	36	40	34	32	Bacteria	Proteobacteria	Alphaproteobacteria	Rhizobiales	Hyphomicrobiaceae	Pedomicrobium	unidentified
a5c6d02b7af592a19fde648d25f918e3	69	15	40	33	43	51	30	40	50	56	29	33	Bacteria	Proteobacteria	Alphaproteobacteria	Rickettsiales	Mitochondria	Mitochondria	Pythium_ultimum
125a1046ecd7d639f0e3549e8c6c3438	32	23	51	41	49	28	40	75	38	20	35	48	Bacteria	Proteobacteria	Alphaproteobacteria	Sphingomonadales	Sphingomonadaceae	Altererythrobacter	unidentified
5e3b8553831a48f6886cb8c1badce322	47	31	41	33	53	43	56	44	53	40	0	38	Bacteria	Planctomycetota	Phycisphaerae	Tepidisphaerales	WD2101_soil_group	WD2101_soil_group	uncultured_Planctomycetia
82b7a5359386db181ac714e6367447b8	42	0	85	54	0	67	45	70	65	0	0	51	Bacteria	Chloroflexi	Chloroflexia	Chloroflexales	Roseiflexaceae	uncultured	unidentified
917661a8281f6811e4e13a8cd2b0c851	41	23	51	44	39	45	54	36	42	29	33	42	Bacteria	Acidobacteriota	Blastocatellia	11-24	11-24	11-24	uncultured_bacterium
f0ca99989d12af8d68b9ffd5ed4638ee	46	33	39	35	43	44	34	31	58	36	38	41	Bacteria	Actinobacteriota	Acidimicrobiia	uncultured	uncultured	uncultured	uncultured_Acidimicrobiia
c0270dc1d2a0ea5a45619bfb72973110	41	0	39	64	60	43	0	67	63	42	49	0	Bacteria	Actinobacteriota	Acidimicrobiia	Microtrichales	Iamiaceae	Iamia	unidentified
8257b0721a12f3c1bdf5aa69441983b0	34	30	38	34	42	38	37	20	45	43	40	57	Bacteria	Gemmatimonadota	Gemmatimonadetes	Gemmatimonadales	Gemmatimonadaceae	uncultured	unidentified
cff30da63cad2d9081351ff7e1089f4a	33	48	0	60	55	0	45	70	0	31	66	50	Bacteria	Actinobacteriota	Actinobacteria	Micrococcales	Intrasporangiaceae	Lapillicoccus	unidentified
d34eb7fbd776ac95e55dd2a2d080f126	30	21	47	47	35	35	51	39	37	27	40	48	Bacteria	Chloroflexi	KD4-96	KD4-96	KD4-96	KD4-96	uncultured_bacterium
9494b5ca6154e258800a17fd0391b6b6	12	57	15	57	16	20	21	49	15	71	85	39	Bacteria	Acidobacteriota	Blastocatellia	Blastocatellales	Blastocatellaceae	JGI_0001001-H03	unidentified
0d408248cb59014303014a4e9ed4725f	0	0	115	20	0	16	29	20	43	33	0	180	Bacteria	Cyanobacteria	Cyanobacteriia	Chloroplast	Chloroplast	Chloroplast	unidentified
e2ada9580d79e595c5deae4777fa7af2	28	25	30	41	41	43	54	34	47	34	36	41	Bacteria	Actinobacteriota	Acidimicrobiia	IMCC26256	IMCC26256	IMCC26256	metagenome
3869571b68468e23e459cdcb672ccf60	35	28	35	46	31	43	49	38	44	34	32	38	Bacteria	Actinobacteriota	Actinobacteria	Propionibacteriales	Propionibacteriaceae	Microlunatus	unidentified
65525c9ed340186dfdf9456e22fe7487	0	32	38	53	39	42	59	0	54	39	41	53	Bacteria	Actinobacteriota	MB-A2-108	MB-A2-108	MB-A2-108	MB-A2-108	unidentified
f2d73de668e382b0b4330863ab2a051e	36	30	41	30	38	29	44	38	37	41	37	44	Bacteria	Actinobacteriota	Actinobacteria	Micrococcales	Intrasporangiaceae	unidentified	unidentified
1a65856cb4822515e9afc8006ddff8f5	28	30	43	42	46	36	34	37	35	35	36	38	Bacteria	Gemmatimonadota	Gemmatimonadetes	Gemmatimonadales	Gemmatimonadaceae	Gemmatimonas	uncultured_Gemmatimonadales
7935d6f5acef8e435b0be65ab9e2d1dd	30	28	50	34	48	27	28	28	42	36	41	42	Bacteria	Actinobacteriota	Actinobacteria	Streptomycetales	Streptomycetaceae	Streptomyces	unidentified
d5bbba7b4c92386663f0f2651bda35e9	33	34	32	37	48	28	48	36	26	41	33	37	Bacteria	Bacteroidota	Bacteroidia	Cytophagales	Hymenobacteraceae	Hymenobacter	unidentified
ee565e28cfa2cd87e7a8e2670d4cab9e	34	28	32	33	26	29	49	58	29	34	36	41	Bacteria	Actinobacteriota	Actinobacteria	Micromonosporales	Micromonosporaceae	Actinoplanes	Actinoplanes_digitatis
720a80418d87a275ac31c7f7044b0407	0	39	40	47	24	0	59	40	63	25	46	44	Bacteria	Bacteroidota	Bacteroidia	Chitinophagales	Saprospiraceae	uncultured	unidentified
0e6a8aaf8ef08a4baed5b465dd86a46f	0	0	49	44	64	69	72	0	66	0	0	60	Bacteria	Actinobacteriota	Actinobacteria	Micrococcales	Micrococcaceae	unidentified	unidentified
fb45240de3ebdd373c9bafb3bd62adab	23	27	0	36	0	34	50	46	66	55	40	46	Bacteria	Proteobacteria	Alphaproteobacteria	Rhizobiales	Rhizobiaceae	Mesorhizobium	unidentified
11d8b6682a4a437add504f5ba916b5bc	36	20	39	32	31	33	39	36	43	36	28	48	Bacteria	Actinobacteriota	Actinobacteria	Propionibacteriales	Nocardioidaceae	Nocardioides	unidentified
a66ea0e5d3508319ff1bdddda9cf027d	67	8	10	45	28	74	12	54	32	58	16	15	Bacteria	Gemmatimonadota	Gemmatimonadetes	Gemmatimonadales	Gemmatimonadaceae	uncultured	unidentified
661ed24dc393b0c317b018bb35c61570	44	34	28	31	30	43	37	27	42	32	29	42	Bacteria	Proteobacteria	Alphaproteobacteria	Rhizobiales	Xanthobacteraceae	uncultured	unidentified
dbfd254f4744a3d4159a10b71c056492	41	17	44	43	44	0	36	30	48	33	45	37	Bacteria	Acidobacteriota	Subgroup_5	Subgroup_5	Subgroup_5	Subgroup_5	uncultured_bacterium
42202fb527fee68ef5ca9abd3ec40edc	29	28	38	40	40	44	35	12	46	20	38	43	Bacteria	Gemmatimonadota	Gemmatimonadetes	Gemmatimonadales	Gemmatimonadaceae	Gemmatimonas	uncultured_bacterium
fedf2e705208feff9a1a1a943f2fbd50	43	0	0	52	54	62	0	0	73	0	127	0	Bacteria	Gemmatimonadota	Gemmatimonadetes	Gemmatimonadales	Gemmatimonadaceae	uncultured	unidentified
75a082258b5d11c4b9dbd800263382c8	28	22	49	41	22	36	44	36	45	35	26	25	Bacteria	Cyanobacteria	Cyanobacteriia	Chloroplast	Chloroplast	Chloroplast	unidentified
1834a935d113e8064b99386d00459682	51	54	62	0	0	0	0	55	63	0	67	56	Bacteria	Proteobacteria	Alphaproteobacteria	Azospirillales	Azospirillaceae	Skermanella	unidentified
34917a6bd02555068666e60d6d420d12	34	24	45	32	35	34	56	28	45	20	32	22	Bacteria	Gemmatimonadota	Gemmatimonadetes	Gemmatimonadales	Gemmatimonadaceae	uncultured	unidentified
0d99a957413a6eb6c5b08f07517314fb	39	0	81	0	0	75	46	0	84	38	0	40	Bacteria	Actinobacteriota	Actinobacteria	Micrococcales	Intrasporangiaceae	Lapillicoccus	unidentified
d398f9380cfeab37cf7849a35215006b	32	32	31	21	34	33	49	0	53	66	0	52	Bacteria	Proteobacteria	Alphaproteobacteria	Reyranellales	Reyranellaceae	Reyranella	unidentified
6d8d9f457e1ea1911ec95e218f84962c	32	39	11	34	48	45	14	52	23	31	33	40	Bacteria	Bacteroidota	Bacteroidia	Cytophagales	Hymenobacteraceae	Adhaeribacter	unidentified
d2d2fa8eb921ef7bae75e5705891d4e6	23	23	35	33	41	27	39	29	43	42	26	41	Bacteria	Actinobacteriota	Actinobacteria	Micrococcales	Intrasporangiaceae	unidentified	unidentified
43715f4d2b39c6e49fd376894e884ddb	41	0	32	0	51	54	44	34	74	44	0	24	Bacteria	Bacteroidota	Bacteroidia	Chitinophagales	Saprospiraceae	uncultured	uncultured_Haliscomenobacter
65181963d85a5f730ae3fcdea353e038	0	30	40	42	37	47	32	38	35	25	25	47	Bacteria	Actinobacteriota	Actinobacteria	Corynebacteriales	Mycobacteriaceae	Mycobacterium	unidentified
c594d45e8836ab97ddb85761fe0af8e2	0	0	81	52	0	62	54	0	46	43	0	60	Bacteria	Chloroflexi	KD4-96	KD4-96	KD4-96	KD4-96	unidentified
ff808969661595f20c94b6b6e2249e05	38	26	38	24	44	27	41	20	41	41	21	35	Bacteria	Proteobacteria	Alphaproteobacteria	Acetobacterales	Acetobacteraceae	uncultured	uncultured_Paracraurococcus
8da54b312cf0c930bcfdb6bd45afc0bf	30	53	0	0	0	0	0	40	70	83	80	38	Bacteria	Proteobacteria	Gammaproteobacteria	Burkholderiales	Comamonadaceae	Polaromonas	unidentified
f34029ce91deb8a1dcfb04059f8aec77	30	32	36	39	29	42	4	36	42	27	43	33	Bacteria	Acidobacteriota	Blastocatellia	Blastocatellales	Blastocatellaceae	Stenotrophobacter	unidentified
65ee234c68a0216c4a6cafafde80f246	0	49	47	0	0	64	40	50	33	34	42	34	Bacteria	Proteobacteria	Alphaproteobacteria	Sphingomonadales	Sphingomonadaceae	unidentified	unidentified
00604befb059be77e943f63ea42027fc	0	28	27	30	39	34	58	33	40	35	33	36	Bacteria	Actinobacteriota	Actinobacteria	Pseudonocardiales	Pseudonocardiaceae	Pseudonocardia	uncultured_bacterium
ab6ea397adb4d150979a2c24d08424e5	31	22	41	39	39	0	47	0	51	51	26	44	Bacteria	Chloroflexi	Anaerolineae	Anaerolineales	Anaerolineaceae	UTCFX1	uncultured_bacterium
7d336d6357afc7519a268b6171ce01d1	35	33	36	37	0	49	38	0	31	51	44	32	Bacteria	Proteobacteria	Alphaproteobacteria	Sphingomonadales	Sphingomonadaceae	Sphingomonas	unidentified
0c58c1a29c94aff410d8707218291669	31	13	36	29	33	34	51	27	42	44	20	26	Bacteria	Armatimonadota	Chthonomonadetes	Chthonomonadales	Chthonomonadales	Chthonomonadales	uncultured_bacterium
89ee284f4bac1d18cf6cf0d3b9c2ba3f	33	25	33	25	37	38	43	33	41	27	21	29	Bacteria	Proteobacteria	Alphaproteobacteria	Tistrellales	Geminicoccaceae	Candidatus_Alysiosphaera	metagenome
c597a8c3618fa7f5540829298022fee3	24	26	27	31	41	32	37	35	39	30	34	28	Bacteria	Actinobacteriota	Actinobacteria	Propionibacteriales	Nocardioidaceae	Marmoricola	uncultured_bacterium
480c776eff318191a149e7b516760369	32	35	47	0	44	41	44	50	51	0	38	0	Bacteria	Proteobacteria	Alphaproteobacteria	Rhizobiales	Xanthobacteraceae	Rhodoplanes	unidentified
ce0bca4ca76dd25ecdcdae42e8d17936	0	0	52	40	51	53	40	0	54	0	39	52	Bacteria	Gemmatimonadota	Gemmatimonadetes	Gemmatimonadales	Gemmatimonadaceae	uncultured	unidentified
8e65a000f9c76cdc1cc9216f95e99bd5	0	0	46	59	46	32	51	0	44	0	40	62	Bacteria	Proteobacteria	Alphaproteobacteria	Rhizobiales	Xanthobacteraceae	unidentified	unidentified
e40769775c9c0acd819d62a5b0c0c3f8	25	25	47	0	47	35	40	40	31	20	42	27	Bacteria	Actinobacteriota	Acidimicrobiia	Microtrichales	Iamiaceae	Iamia	unidentified
559da69b91fbeb83bd5531969102b8d9	16	28	31	23	30	27	43	39	36	38	29	36	Bacteria	Actinobacteriota	Actinobacteria	Frankiales	uncultured	uncultured	unidentified
6ac615652b4ba28dfdaae2d17a42c6ff	0	28	35	28	59	39	38	21	35	34	33	25	Bacteria	Gemmatimonadota	Gemmatimonadetes	Gemmatimonadales	Gemmatimonadaceae	Gemmatimonas	uncultured_soil
714f2d23c91b2d8f77b695956b75a12c	19	27	31	30	32	25	48	29	38	46	26	23	Bacteria	Proteobacteria	Alphaproteobacteria	Rhodobacterales	Rhodobacteraceae	Amaricoccus	uncultured_bacterium
9b5ced14062a6447c5b9d41d19f695aa	42	0	49	59	42	0	42	0	31	37	27	44	Bacteria	Acidobacteriota	Subgroup_5	Subgroup_5	Subgroup_5	Subgroup_5	uncultured_bacterium
cb9b0fe4c84e6b46011d27f277f642d6	39	22	30	25	26	34	37	34	28	28	31	39	Bacteria	Planctomycetota	Phycisphaerae	Tepidisphaerales	WD2101_soil_group	WD2101_soil_group	unidentified
1ebee7522abe3c293ea6e6555020756c	29	23	36	36	29	34	40	38	32	20	22	34	Bacteria	Planctomycetota	Phycisphaerae	Tepidisphaerales	WD2101_soil_group	WD2101_soil_group	unidentified
89537ae72467c2297a2ede901b181e91	0	33	53	39	34	37	37	44	26	0	37	33	Bacteria	Chloroflexi	Gitt-GS-136	Gitt-GS-136	Gitt-GS-136	Gitt-GS-136	uncultured_Chloroflexus
b4f7ef19c05dfca1ebe0c04b6322e57e	26	0	35	36	29	40	32	22	41	40	30	38	Bacteria	Actinobacteriota	Actinobacteria	Micrococcales	Micrococcaceae	Pseudarthrobacter	unidentified
ec39c2f242c3de62177b1f387400ffcc	24	24	37	39	27	38	30	21	28	43	23	32	Bacteria	Actinobacteriota	Actinobacteria	Micrococcales	Microbacteriaceae	Agromyces	unidentified
ab029d6465996e719a2d470e4e2d6851	43	55	0	0	85	0	39	0	0	62	81	0	Bacteria	Chloroflexi	Chloroflexia	Chloroflexales	Roseiflexaceae	uncultured	uncultured_bacterium
a42394ff6dcba181e15d209b42addac6	0	0	142	0	0	0	68	79	0	76	0	0	Bacteria	Bacteroidota	Bacteroidia	Flavobacteriales	Flavobacteriaceae	Flavobacterium	unidentified
b65e4be4c9ee4ac108bd97606b6bf88c	32	0	56	30	0	27	47	43	0	52	38	37	Bacteria	Proteobacteria	Alphaproteobacteria	Azospirillales	Azospirillaceae	Skermanella	unidentified
9ea92da8d43a83a3590ccdfb20ce4a0d	25	27	34	41	22	24	31	31	37	31	28	31	Bacteria	Chloroflexi	Anaerolineae	Anaerolineales	Anaerolineaceae	UTCFX1	uncultured_bacterium
70da9d13b4d066b5e7d114f2a09cc106	0	0	35	0	48	55	49	27	0	26	92	30	Bacteria	Actinobacteriota	Actinobacteria	Micromonosporales	Micromonosporaceae	Actinoplanes	Actinoplanes_nipponensis
fe65d096a5ce608908c4ec1ebd72e1f9	44	0	0	55	56	58	0	0	0	33	66	49	Bacteria	Gemmatimonadota	Gemmatimonadetes	Gemmatimonadales	Gemmatimonadaceae	uncultured	unidentified
72d010d2b6358931abab64c055db88f9	34	0	63	0	47	25	34	37	48	38	0	35	Bacteria	Proteobacteria	Alphaproteobacteria	Sphingomonadales	Sphingomonadaceae	Altererythrobacter	unidentified
003372bff53834362997af797255fe10	0	0	18	91	23	29	18	46	67	38	14	16	Bacteria	Actinobacteriota	Actinobacteria	Frankiales	Geodermatophilaceae	Blastococcus	unidentified
9800052967ab80cc35ac76eb13256a63	20	17	30	25	54	26	34	33	33	25	29	33	Bacteria	Actinobacteriota	Actinobacteria	Propionibacteriales	Nocardioidaceae	Marmoricola	unidentified
4ed0d162babba361e448a76f96e19bad	0	0	0	50	56	54	0	47	62	32	0	56	Bacteria	Firmicutes	Clostridia	Clostridiales	Clostridiaceae	Clostridium_sensu_stricto_13	uncultured_bacterium
733eb4f010c18e8758645ccf6ede5681	30	22	32	23	27	28	29	40	38	33	27	25	Bacteria	Actinobacteriota	Actinobacteria	Propionibacteriales	Nocardioidaceae	Marmoricola	uncultured_bacterium
5723971e5c939f0578b64b71b09e4cd9	0	30	35	33	31	31	31	36	26	30	27	43	Bacteria	Actinobacteriota	Actinobacteria	Frankiales	Sporichthyaceae	uncultured	uncultured_bacterium
e12a453fcf3b93c8a8e4ebed28e4894a	28	0	36	51	39	33	25	38	47	0	31	21	Bacteria	Proteobacteria	Alphaproteobacteria	Tistrellales	Geminicoccaceae	Candidatus_Alysiosphaera	metagenome
d6f01ba479529e1b96c9eff2f1df840c	26	0	29	42	31	28	37	23	23	38	38	33	Bacteria	Acidobacteriota	Subgroup_11	Subgroup_11	Subgroup_11	Subgroup_11	uncultured_bacterium
bead838b8b4b7830aea5cdacfaeb3583	26	30	29	46	30	32	26	25	27	19	30	27	Bacteria	Bacteroidota	Bacteroidia	Cytophagales	Hymenobacteraceae	Adhaeribacter	uncultured_soil
0d56fd9018b61f080524bd986f27fdd4	25	0	24	27	55	33	37	24	41	24	17	40	Bacteria	Actinobacteriota	Acidimicrobiia	IMCC26256	IMCC26256	IMCC26256	uncultured_Ferrimicrobium
795e3f491fec0a7e3917c1a0060bc34e	42	0	44	51	0	0	27	36	59	59	28	0	Bacteria	Actinobacteriota	Actinobacteria	Propionibacteriales	Propionibacteriaceae	Microlunatus	unidentified
9e694f47ec8045c38419eec4a5009819	33	22	24	23	32	14	40	16	41	45	23	32	Bacteria	Acidobacteriota	Blastocatellia	11-24	11-24	11-24	uncultured_bacterium
b868ccf73c72de66b73d0f813969b63d	50	0	0	49	51	41	0	0	57	0	44	48	Bacteria	Actinobacteriota	Actinobacteria	Streptomycetales	Streptomycetaceae	Streptomyces	unidentified
d18d496894a4bdc542a41183b64c0ad9	30	35	0	37	0	57	47	40	0	33	29	32	Bacteria	Actinobacteriota	Actinobacteria	Propionibacteriales	Nocardioidaceae	Nocardioides	unidentified
eb666190aa7590212e7e19c8fbdda36d	23	27	29	30	40	24	38	12	40	30	22	25	Bacteria	Proteobacteria	Alphaproteobacteria	Rhizobiales	Rhizobiales_Incertae_Sedis	uncultured	unidentified
ed7e47c2ea0af708f4737e4f167e1d9f	38	0	29	35	19	41	38	25	44	19	26	25	Bacteria	Chloroflexi	KD4-96	KD4-96	KD4-96	KD4-96	unidentified
31f049617331ff6853dc1424a19346a5	0	0	29	25	38	49	33	19	52	42	20	32	Bacteria	Actinobacteriota	Actinobacteria	Frankiales	Geodermatophilaceae	unidentified	unidentified
129851bfc29342bf8cb9f8cf1086c445	0	29	26	23	29	38	33	33	34	32	30	27	Bacteria	Actinobacteriota	Actinobacteria	Pseudonocardiales	Pseudonocardiaceae	Pseudonocardia	uncultured_bacterium
bf647296e050f9a1ffbd716ae62cc7af	0	18	29	32	40	38	40	24	27	31	35	17	Bacteria	Gemmatimonadota	Gemmatimonadetes	Gemmatimonadales	Gemmatimonadaceae	uncultured	unidentified
551f797c3aca3d9a21d83f09ca3ed074	0	32	46	36	28	32	42	0	55	0	32	26	Bacteria	Actinobacteriota	Actinobacteria	Streptosporangiales	Streptosporangiaceae	unidentified	unidentified
090302b4a230bb5b1d5e553b6696e6e5	0	25	33	25	22	28	44	38	26	29	32	27	Bacteria	Bacteroidota	Bacteroidia	Cytophagales	Hymenobacteraceae	Adhaeribacter	uncultured_soil
cff1473b2abbabaf928fa0790281a054	50	19	18	17	15	51	23	18	34	26	30	26	Bacteria	Proteobacteria	Alphaproteobacteria	Rhizobiales	Xanthobacteraceae	uncultured	unidentified
546724c64564a398f7ef64f177f5ecba	46	0	48	0	0	0	0	35	76	74	0	48	Bacteria	Chloroflexi	Anaerolineae	Anaerolineales	Anaerolineaceae	UTCFX1	uncultured_bacterium
a55156bd978818925c43adb18e34c3b1	35	15	0	29	41	26	47	28	25	34	0	46	Bacteria	Gemmatimonadota	Gemmatimonadetes	Gemmatimonadales	Gemmatimonadaceae	Gemmatimonas	Gemmatimonadaceae_bacterium
e27580fc4203fb14d788ffa31cf45228	30	13	26	28	30	20	35	31	27	24	30	29	Bacteria	Bdellovibrionota	Bdellovibrionia	Bdellovibrionales	Bdellovibrionaceae	OM27_clade	uncultured_bacterium
d5830de8e3143330078990262cec3e87	24	22	41	24	29	23	26	18	36	0	38	41	Bacteria	Chloroflexi	Gitt-GS-136	Gitt-GS-136	Gitt-GS-136	Gitt-GS-136	uncultured_bacterium
d09c598a4d5a35b459919f0d46193b87	33	13	16	27	22	29	31	30	42	24	21	33	Bacteria	Proteobacteria	Alphaproteobacteria	Elsterales	uncultured	uncultured	unidentified
e1aeb10550de204d9097762bd7053391	30	20	0	28	25	24	29	29	36	31	35	34	Bacteria	Actinobacteriota	Actinobacteria	Pseudonocardiales	Pseudonocardiaceae	Pseudonocardia	unidentified
8d87bd800c30a41bea807042267e2d02	0	0	31	0	50	32	34	0	45	30	53	46	Bacteria	Proteobacteria	Alphaproteobacteria	Caulobacterales	Caulobacteraceae	Phenylobacterium	unidentified
bd1d8412add3b2a63a68650edaeb64d2	34	35	26	21	18	38	17	22	45	0	37	27	Bacteria	Acidobacteriota	Blastocatellia	Blastocatellales	Blastocatellaceae	Aridibacter	uncultured_bacterium
f9ac5c352d9d64cc24d58c6c5b02e345	20	0	59	0	0	51	49	20	25	51	0	45	Bacteria	Proteobacteria	Alphaproteobacteria	Rhizobiales	Xanthobacteraceae	Rhodoplanes	uncultured_bacterium
4eea9452397d941fd47a2a5f9240c1c3	0	53	0	0	63	61	70	0	0	0	0	73	Bacteria	Actinobacteriota	Actinobacteria	Propionibacteriales	Propionibacteriaceae	Microlunatus	uncultured_actinobacterium
8984e530c0cefb9c899979eb609ba445	0	0	0	36	37	36	49	21	62	40	0	39	Bacteria	Chloroflexi	TK10	TK10	TK10	TK10	unidentified
7460f2abd8125aa36a938d403b93161b	36	0	43	38	35	25	43	30	0	29	0	38	Bacteria	Actinobacteriota	Acidimicrobiia	Actinomarinales	uncultured	uncultured	unidentified
67411702efd50d1eefaf296f2760c314	12	22	32	34	36	23	28	30	27	28	21	23	Bacteria	Proteobacteria	Alphaproteobacteria	Rhizobiales	Beijerinckiaceae	alphaI_cluster	uncultured_bacterium
17bae7c4ce514c4ca136d01e6e0a9a86	0	9	0	0	0	0	0	307	0	0	0	0	Bacteria	Proteobacteria	Alphaproteobacteria	Rhizobiales	Kaistiaceae	Kaistia	uncultured_bacterium
0da1ede114985187ae55b57a940cc9fa	0	0	22	41	73	32	53	0	36	0	59	0	Bacteria	Actinobacteriota	Actinobacteria	Kineosporiales	Kineosporiaceae	Kineosporia	unidentified
979a74e26a1894382ad06dd9103b6a84	40	33	40	0	40	0	45	48	28	0	0	40	Bacteria	Actinobacteriota	Actinobacteria	Micromonosporales	Micromonosporaceae	Luedemannella	unidentified
b7e33f92e1c4659df2d56a1142eb9ef7	20	26	22	19	34	35	33	19	30	30	22	24	Bacteria	Actinobacteriota	Actinobacteria	Micrococcales	Intrasporangiaceae	unidentified	unidentified
f09cd19683defea91c945374148e7998	72	17	41	41	0	25	60	0	35	0	21	0	Bacteria	Actinobacteriota	Actinobacteria	Kineosporiales	Kineosporiaceae	Kineosporia	uncultured_bacterium
d1828ed630f5d31adae38c45a8a93e97	28	0	30	26	26	27	43	26	32	20	21	33	Bacteria	Proteobacteria	Alphaproteobacteria	Rhizobiales	Rhizobiales_Incertae_Sedis	uncultured	unidentified
d7abf3919546ebffb0432d439cbf3d2b	0	0	44	0	60	0	51	0	50	0	50	55	Bacteria	Actinobacteriota	Actinobacteria	Propionibacteriales	Nocardioidaceae	Marmoricola	unidentified
db1b8594b25799dadf66b71d7119b53f	26	22	29	23	21	31	31	18	40	25	19	21	Bacteria	Actinobacteriota	Actinobacteria	Propionibacteriales	Propionibacteriaceae	Microlunatus	uncultured_actinobacterium
07581655d4bd716277462af20f366c8d	18	20	29	34	23	24	37	22	35	20	23	21	Bacteria	Actinobacteriota	Actinobacteria	Streptomycetales	Streptomycetaceae	Streptomyces	Streptomyces_turgidiscabies
e5beeac637a7e7cff3eb92e16f034323	16	49	24	26	28	0	57	0	46	0	38	21	Bacteria	Actinobacteriota	Actinobacteria	Micrococcales	Microbacteriaceae	unidentified	unidentified
0b8d3485b7a5c452e3509415b9ea2539	0	30	26	26	30	29	27	24	37	18	21	35	Bacteria	Actinobacteriota	Actinobacteria	Pseudonocardiales	Pseudonocardiaceae	Pseudonocardia	uncultured_bacterium
3e25599140ecc5de8538a68b6fc7c598	17	17	33	24	22	28	29	27	27	34	22	22	Bacteria	Bdellovibrionota	Bdellovibrionia	Bdellovibrionales	Bdellovibrionaceae	OM27_clade	uncultured_Myxococcales
1be9e9b43a59553f18abf69b64f20549	25	17	27	23	27	32	23	23	31	25	28	20	Bacteria	Actinobacteriota	Actinobacteria	Micrococcales	Intrasporangiaceae	unidentified	unidentified
2a0c63fb5f011f5abcb2804928fd4e12	46	42	62	54	0	0	35	0	60	0	0	0	Bacteria	Actinobacteriota	Actinobacteria	Micrococcales	Microbacteriaceae	Microbacterium	unidentified
449b4801339a7dadcadcf9db49a01556	31	22	0	0	37	36	34	30	35	28	18	28	Bacteria	Actinobacteriota	Actinobacteria	Micrococcales	Microbacteriaceae	Agromyces	unidentified
c15be10305a78dee571bd652d3d051f4	36	25	42	38	4	20	53	3	43	26	0	6	Bacteria	Actinobacteriota	Actinobacteria	Micrococcales	Microbacteriaceae	Agromyces	unidentified
d5cb3c861226ac892b0e4a0730c8c603	22	22	38	0	32	48	25	0	36	20	27	26	Bacteria	Gemmatimonadota	Gemmatimonadetes	Gemmatimonadales	Gemmatimonadaceae	Gemmatimonas	Gemmatimonadaceae_bacterium
21352328840616cae0943addaee962d2	0	18	31	48	37	26	24	0	30	28	19	33	Bacteria	Actinobacteriota	Acidimicrobiia	Microtrichales	uncultured	uncultured	wastewater_metagenome
619106bbeb9fc617f281b28c966ed583	0	0	36	19	36	32	29	31	19	25	40	26	Bacteria	Gemmatimonadota	Gemmatimonadetes	Gemmatimonadales	Gemmatimonadaceae	Gemmatimonas	unidentified
d5ac11b86eafd8919d20c0fabc5ea62c	30	0	38	23	31	19	28	23	58	18	0	24	Bacteria	Chloroflexi	Chloroflexia	Thermomicrobiales	JG30-KF-CM45	JG30-KF-CM45	unidentified
cd73099a073e63dbc629fd70708b718a	20	15	31	27	15	27	30	25	23	25	22	28	Bacteria	Actinobacteriota	Actinobacteria	Corynebacteriales	Mycobacteriaceae	Mycobacterium	unidentified
2ec0c6ba75ae9ca72fcd3abcbea69e2c	36	13	15	31	27	29	23	15	33	24	17	24	Bacteria	Acidobacteriota	Acidobacteriae	Bryobacterales	Bryobacteraceae	Bryobacter	unidentified
10ef314dcdbfd0a96801360da1ec7092	0	27	19	25	17	40	26	39	31	22	20	21	Bacteria	Actinobacteriota	Actinobacteria	Micromonosporales	Micromonosporaceae	Virgisporangium	uncultured_actinobacterium
a30ede8c5ee2fba9df5a57ca5e5a5b17	23	13	0	23	0	33	39	30	35	26	34	30	Bacteria	Actinobacteriota	Actinobacteria	Streptomycetales	Streptomycetaceae	Streptomyces	unidentified
7d8bb36016996b00f8cb9102386c3141	19	0	32	28	30	22	30	29	17	33	25	21	Bacteria	Chloroflexi	KD4-96	KD4-96	KD4-96	KD4-96	uncultured_Chloroflexi
465332dd3bdff6c49d3b040e8dfffd63	20	20	28	20	31	22	16	19	30	23	27	28	Bacteria	Actinobacteriota	Acidimicrobiia	Microtrichales	Microtrichaceae	IMCC26207	unidentified
062c0606b986150c473b0ffbb7a27f6e	0	0	46	42	27	28	33	30	41	35	0	0	Bacteria	Proteobacteria	Alphaproteobacteria	Rhizobiales	Hyphomicrobiaceae	Pedomicrobium	unidentified
199910dcebe3ecf3f9242553afa7bf96	34	44	0	46	19	0	41	0	19	25	28	25	Bacteria	Proteobacteria	Alphaproteobacteria	Rhizobiales	Devosiaceae	Devosia	unidentified
9fc8893d84ce026cfabad760d44cad2e	0	0	77	37	0	47	0	0	65	0	0	55	Bacteria	Actinobacteriota	Actinobacteria	Micrococcales	Microbacteriaceae	Agromyces	unidentified
3675f485204b6a6e9e203d3699cc4521	0	43	0	23	54	0	34	0	0	60	38	27	Bacteria	Bacteroidota	Bacteroidia	Chitinophagales	Saprospiraceae	uncultured	unidentified
db56b7584cc322e78dd109342677e527	31	22	19	14	29	36	21	17	25	19	22	23	Bacteria	Armatimonadota	Chthonomonadetes	Chthonomonadales	Chthonomonadales	Chthonomonadales	uncultured_bacterium
dde51f267939921e5be46b0508a04f69	28	13	24	16	22	22	31	14	27	20	28	32	Bacteria	Planctomycetota	Phycisphaerae	Tepidisphaerales	WD2101_soil_group	WD2101_soil_group	unidentified
e6e0e364a5f43bef34dd114148232e30	24	18	21	23	21	24	35	17	26	25	23	20	Bacteria	Cyanobacteria	Cyanobacteriia	Cyanobacteriales	Nostocaceae	Nostoc_PCC-73102	unidentified
499227107c849ed9f77241e66d291ce0	19	12	30	25	25	12	23	26	34	20	25	26	Bacteria	Actinobacteriota	Actinobacteria	Micrococcales	Intrasporangiaceae	uncultured	uncultured_bacterium
c30459d5b2e62d3391bb4b2916b6d388	13	12	33	30	39	35	29	0	44	0	22	20	Bacteria	Bacteroidota	Bacteroidia	Flavobacteriales	Flavobacteriaceae	Flavobacterium	unidentified
beed1d1e6c4f53b978eb63c864f5b2b6	20	21	22	35	40	22	30	20	29	16	21	0	Bacteria	Proteobacteria	Alphaproteobacteria	Rhizobiales	Xanthobacteraceae	Pseudorhodoplanes	metagenome
3c26aab05084ccf8fd4a8b288596f268	12	15	18	17	32	17	21	32	21	22	21	48	Bacteria	Chloroflexi	TK10	TK10	TK10	TK10	unidentified
e79b78de62ac7b8ea88de43bedbf4dbd	0	44	60	0	0	0	49	0	0	61	59	0	Bacteria	Cyanobacteria	Cyanobacteriia	Chloroplast	Chloroplast	Chloroplast	Tetradesmus_obliquus
d4173f696194097a3c42e1f8922a61fc	0	0	42	43	38	35	0	0	39	0	38	38	Bacteria	Actinobacteriota	Actinobacteria	Propionibacteriales	Nocardioidaceae	Nocardioides	Kribbella_sp.
9a933989bfd2e85dc4f9b627d2ac02a8	0	42	35	0	35	0	0	0	29	41	44	46	Bacteria	Actinobacteriota	Actinobacteria	Propionibacteriales	Nocardioidaceae	Nocardioides	unidentified
d4d4d5e74648da8e1f54ca9134cf5b0c	0	38	35	0	36	0	0	41	37	41	44	0	Bacteria	Proteobacteria	Alphaproteobacteria	Defluviicoccales	Defluviicoccaceae	Defluviicoccus	uncultured_organism
5457fa91f1ad83c5f3e465ec6e3de7d8	16	0	32	28	25	28	25	32	26	0	24	34	Bacteria	Proteobacteria	Alphaproteobacteria	Rhizobiales	Xanthobacteraceae	uncultured	uncultured_Bradyrhizobiaceae
4b4e71a7a931a901c5d6543755b2e8f2	39	0	0	38	38	42	16	25	31	21	0	18	Bacteria	Chloroflexi	Anaerolineae	Anaerolineales	Anaerolineaceae	uncultured	uncultured_soil
0ba24c2fcee6c9d12ffabc357772b099	43	31	37	0	21	0	17	32	18	25	40	0	Bacteria	Proteobacteria	Alphaproteobacteria	Azospirillales	Azospirillaceae	Skermanella	unidentified
0e0a105d7fac70ef1a0f84360bacdf53	0	0	0	0	0	35	35	46	0	58	41	49	Bacteria	Actinobacteriota	Actinobacteria	Micrococcales	Microbacteriaceae	Microbacterium	unidentified
426028ddba77054ba44d3b939963b505	24	15	32	11	24	23	29	0	24	24	30	26	Bacteria	Proteobacteria	Alphaproteobacteria	Rhodobacterales	Rhodobacteraceae	Amaricoccus	uncultured_bacterium
069a5f04e4f1ed724e25710cf89864af	25	19	29	21	16	24	24	20	24	32	0	27	Bacteria	Proteobacteria	Alphaproteobacteria	Azospirillales	Azospirillaceae	Skermanella	unidentified
2374a7f15fd1a7de8d102b6709543e07	9	14	30	28	21	22	28	21	29	26	17	16	Bacteria	Proteobacteria	Alphaproteobacteria	Rhodobacterales	Rhodobacteraceae	Amaricoccus	uncultured_bacterium
d6df14a86c19a88ce192ac8f5a6a0a4c	0	22	19	20	22	22	23	30	31	33	14	25	Bacteria	Chloroflexi	TK10	TK10	TK10	TK10	metagenome
f752a3b3b5f68a81f485a0346ee90de7	24	7	29	26	26	29	19	0	27	28	22	23	Bacteria	Chloroflexi	Dehalococcoidia	S085	S085	S085	unidentified
db4625880aac8ecb872e462d28ff2a10	36	0	26	15	36	21	21	26	42	14	0	22	Bacteria	Gemmatimonadota	Gemmatimonadetes	Gemmatimonadales	Gemmatimonadaceae	uncultured	uncultured_Gemmatimonadetes
9b7da08c09d7cee546c734dad4509387	26	0	27	35	25	29	26	14	29	0	21	27	Bacteria	Actinobacteriota	Actinobacteria	Frankiales	Geodermatophilaceae	unidentified	unidentified
78e94fc152844e8dcb4ec4c257382f84	0	0	0	0	0	0	0	0	129	22	77	31	Bacteria	Actinobacteriota	Actinobacteria	Pseudonocardiales	Pseudonocardiaceae	Lechevalieria	unidentified
b06b3d75fa5a15400aad29f42159b264	0	0	28	26	25	0	52	54	23	23	0	27	Bacteria	Acidobacteriota	Holophagae	Subgroup_7	Subgroup_7	Subgroup_7	unidentified
69dbbbd86c586705283c010f87e264c5	26	16	28	23	20	32	24	19	26	19	0	24	Bacteria	Proteobacteria	Alphaproteobacteria	Rhizobiales	unidentified	unidentified	unidentified
08180920eecc7b270d3154790c983c85	41	0	26	16	17	22	22	28	39	0	13	31	Bacteria	Actinobacteriota	Actinobacteria	Frankiales	Geodermatophilaceae	unidentified	unidentified
b86c64d066068160643d64a51ab7c746	33	18	48	37	0	34	29	32	23	0	0	0	Bacteria	Proteobacteria	Alphaproteobacteria	Sphingomonadales	Sphingomonadaceae	unidentified	unidentified
3029635f364d4995cb38e4dbb8b71831	27	20	27	0	16	26	35	19	43	22	0	19	Bacteria	Chloroflexi	JG30-KF-CM66	JG30-KF-CM66	JG30-KF-CM66	JG30-KF-CM66	unidentified
78f431e92c1126d4c4154b437a2c87a0	24	30	0	36	0	39	36	50	38	0	0	0	Bacteria	Actinobacteriota	Acidimicrobiia	Microtrichales	Ilumatobacteraceae	Ilumatobacter	metagenome
21df06cac44a4e805c0df6dd6006c927	24	13	32	11	14	18	23	18	24	27	26	23	Bacteria	Proteobacteria	Alphaproteobacteria	Rhizobiales	Xanthobacteraceae	Bradyrhizobium	unidentified
245521fdc114191a5c2778280ee595f0	21	10	24	20	14	27	24	34	19	30	14	16	Bacteria	Cyanobacteria	Cyanobacteriia	Chloroplast	Chloroplast	Chloroplast	Vischeria_sp.
b0ca394439093668c56fb8bd34a70c36	15	17	18	21	21	8	0	22	23	59	33	13	Bacteria	Actinobacteriota	Actinobacteria	Micromonosporales	Micromonosporaceae	Dactylosporangium	unidentified
fb71de6a96998aaa14fa492454e8cafe	0	22	28	0	30	29	36	0	23	20	34	27	Bacteria	Chloroflexi	Ktedonobacteria	C0119	C0119	C0119	uncultured_bacterium
44fa467742c90493777649066fce1e59	19	26	20	18	0	27	35	15	28	17	21	21	Bacteria	Chloroflexi	Gitt-GS-136	Gitt-GS-136	Gitt-GS-136	Gitt-GS-136	unidentified
e0d97553004de7ddb33b2c0a5c235422	14	22	31	0	39	22	0	22	46	32	0	19	Bacteria	Myxococcota	Polyangia	Nannocystales	Nannocystaceae	Nannocystis	uncultured_Nannocystaceae
9d7eaa4f0e3681ecbf69c483e7085a76	20	13	26	0	31	35	27	20	23	0	21	30	Bacteria	Proteobacteria	Alphaproteobacteria	Tistrellales	Geminicoccaceae	Candidatus_Alysiosphaera	uncultured_bacterium
d0a4711ab3bc8cf8d51b3393277acfb5	0	71	0	0	10	34	4	0	7	40	71	9	Bacteria	Cyanobacteria	Cyanobacteriia	Chloroplast	Chloroplast	Chloroplast	Bacillaria_paxillifer
f89a200a8529f1e899d5b8abeb276ee4	38	21	28	20	15	19	0	22	49	17	16	0	Bacteria	Proteobacteria	Alphaproteobacteria	Sphingomonadales	Sphingomonadaceae	Altererythrobacter	unidentified
4b63dbe3dbb1ff77a03e75a8ef146b39	25	15	28	0	21	17	27	24	28	0	29	30	Bacteria	Planctomycetota	Phycisphaerae	Tepidisphaerales	WD2101_soil_group	WD2101_soil_group	uncultured_bacterium
a7072c894d0d1b5f350f3a28fd0b5d83	24	13	19	21	31	0	26	10	35	23	17	25	Bacteria	Chloroflexi	Chloroflexia	Chloroflexales	Roseiflexaceae	uncultured	uncultured_Chloroflexi
80b71d651bf3d277debd2b83fae46e65	43	34	0	0	37	0	49	0	4	39	35	1	Bacteria	Actinobacteriota	Actinobacteria	Micrococcales	Microbacteriaceae	Agromyces	unidentified
b7b6a57669d0b96bad3a7f2d95ec15c1	23	16	21	15	17	15	26	31	0	27	17	34	Bacteria	Actinobacteriota	Actinobacteria	Micrococcales	Intrasporangiaceae	Terrabacter	unidentified
e717c6386b4ea0fd1338d4ce9fe6ff41	13	0	34	45	0	26	19	14	12	50	0	29	Bacteria	Chloroflexi	KD4-96	KD4-96	KD4-96	KD4-96	unidentified
1b9bc5da5e167511c5fadc6790b77ed8	44	0	29	0	19	0	33	0	35	18	27	36	Bacteria	Bacteroidota	Bacteroidia	Chitinophagales	Saprospiraceae	uncultured	unidentified
6c7ea328615c842d3f7c60cc4abe6c56	28	22	25	0	26	30	20	0	18	23	26	23	Bacteria	Planctomycetota	Phycisphaerae	Tepidisphaerales	WD2101_soil_group	WD2101_soil_group	uncultured_bacterium
eec7dcae912c676540dc0a012c34608e	28	0	29	0	40	33	27	9	36	23	16	0	Bacteria	Bacteroidota	Kapabacteria	Kapabacteriales	Kapabacteriales	Kapabacteriales	unidentified
1445102f74f539008b4da8368ba57a2f	23	14	39	28	23	23	0	11	0	19	31	30	Bacteria	Acidobacteriota	Blastocatellia	Blastocatellales	Blastocatellaceae	unidentified	unidentified
c36b965b26d9312e9b5bb8f26f570c7c	25	18	32	23	19	0	20	22	26	17	20	17	Bacteria	Acidobacteriota	Subgroup_5	Subgroup_5	Subgroup_5	Subgroup_5	uncultured_Acidobacteria
99c1a1a63bd6f516b9bde4dde5897d05	13	21	24	15	37	14	19	19	20	21	15	21	Bacteria	Proteobacteria	Alphaproteobacteria	Tistrellales	Geminicoccaceae	Candidatus_Alysiosphaera	unidentified
2c5cdc5eee7aea2c775c3823e09c3d9e	11	16	23	0	22	25	33	34	27	19	0	28	Bacteria	Actinobacteriota	Actinobacteria	Frankiales	Nakamurellaceae	Nakamurella	Nakamurella_multipartita
72dba45caff5b885edd5a4a50667fd73	0	23	49	0	0	0	0	0	0	32	134	0	Bacteria	Actinobacteriota	Actinobacteria	Micromonosporales	Micromonosporaceae	Actinoplanes	unidentified
4fa4693a083a72c7a6671b33739ee88b	52	40	0	0	56	0	0	40	0	0	49	0	Bacteria	Chloroflexi	KD4-96	KD4-96	KD4-96	KD4-96	uncultured_Levilinea
ad4177629fd440162f998ae48e7d6ca7	25	0	24	24	35	34	0	18	33	0	43	0	Bacteria	Actinobacteriota	Acidimicrobiia	Microtrichales	Ilumatobacteraceae	uncultured	uncultured_bacterium
d87799936d8310fcee177988042ef602	0	19	0	0	81	0	0	0	0	0	93	43	Bacteria	Actinobacteriota	Actinobacteria	Micromonosporales	Micromonosporaceae	Actinoplanes	unidentified
e2217a08e190a888199b80f005a738b1	29	0	31	30	31	17	29	22	0	26	0	20	Bacteria	Actinobacteriota	Actinobacteria	Propionibacteriales	Propionibacteriaceae	Microlunatus	unidentified
573ff2ed7cc84f02b863634734818971	18	30	14	0	32	10	31	16	32	10	25	16	Bacteria	Proteobacteria	Alphaproteobacteria	Tistrellales	Geminicoccaceae	Candidatus_Alysiosphaera	metagenome
b98e10d0a9dae3e73e907c5c53af91c3	25	0	0	0	0	0	42	41	37	45	43	0	Bacteria	Actinobacteriota	Acidimicrobiia	Microtrichales	Iamiaceae	Iamia	unidentified
18751d3ec029254f876d1eab3887f63f	27	21	0	20	31	14	20	34	24	0	24	17	Bacteria	Proteobacteria	Alphaproteobacteria	Rhodobacterales	Rhodobacteraceae	Amaricoccus	uncultured_bacterium
da1fc6bf3988c5f6c42fe74ec18b28de	0	24	21	0	22	21	39	28	21	30	0	26	Bacteria	Proteobacteria	Alphaproteobacteria	Rhizobiales	Beijerinckiaceae	Microvirga	unidentified
63e88bcbb1fca7a5447178e5d7d15cf3	19	24	21	33	27	0	30	25	0	17	15	20	Bacteria	Chloroflexi	KD4-96	KD4-96	KD4-96	KD4-96	uncultured_bacterium
2649282b964c6b0608e13a4a912b659a	19	17	39	0	23	0	36	27	19	34	17	0	Bacteria	Actinobacteriota	Actinobacteria	Propionibacteriales	Nocardioidaceae	Nocardioides	Nocardioides_islandensis
22df8048a65771feeb999901ef4822ec	18	9	20	22	14	23	22	13	33	28	12	17	Bacteria	Actinobacteriota	Actinobacteria	Micrococcales	Intrasporangiaceae	Phycicoccus	unidentified
f2dd72f21f749e979fdc000e8030d28b	15	18	22	13	16	14	28	21	34	0	23	27	Bacteria	Actinobacteriota	Actinobacteria	Frankiales	uncultured	uncultured	unidentified
7f7e231e824315761de2a1dc503b5fa6	0	0	29	31	0	29	43	31	35	33	0	0	Bacteria	Actinobacteriota	Actinobacteria	Frankiales	Sporichthyaceae	uncultured	uncultured_bacterium
462521a31a3667126727e27e9128ccc5	42	0	34	38	0	40	0	0	0	0	42	33	Bacteria	Gemmatimonadota	Gemmatimonadetes	Gemmatimonadales	Gemmatimonadaceae	uncultured	unidentified
ee2949c89995a5a3c6af187475507904	0	0	59	24	44	25	0	0	24	30	23	0	Bacteria	Actinobacteriota	Actinobacteria	Micromonosporales	Micromonosporaceae	unidentified	unidentified
bb1649c3a93c0c10004bc82339f2c362	34	30	32	0	31	0	0	0	26	24	22	29	Bacteria	Actinobacteriota	Actinobacteria	Micrococcales	Microbacteriaceae	Microbacterium	unidentified
071d563bbe9368d5161e4753306dc923	22	14	19	18	24	27	16	14	34	0	16	24	Bacteria	Actinobacteriota	Actinobacteria	Micrococcales	Micrococcaceae	unidentified	unidentified
19c76fb6a37738549633b4b03be5ec8e	18	18	0	34	44	0	22	33	0	29	0	30	Bacteria	Actinobacteriota	Actinobacteria	Streptosporangiales	Thermomonosporaceae	Actinocorallia	unidentified
66e7f0b9ac0de2394d39e5e3242e9837	16	20	27	25	20	17	27	21	39	0	0	16	Bacteria	Actinobacteriota	MB-A2-108	MB-A2-108	MB-A2-108	MB-A2-108	uncultured_actinobacterium
d9244655ecdc31589f6a3ba7b7fd9bc7	0	0	20	22	32	0	23	31	46	21	33	0	Bacteria	WS2	WS2	WS2	WS2	WS2	uncultured_soil
eaba5ec26c468598d45c37622e39aabf	19	26	23	0	17	0	19	24	23	35	14	27	Bacteria	Actinobacteriota	Actinobacteria	Pseudonocardiales	Pseudonocardiaceae	Actinomycetospora	unidentified
f580137f7e3215de26ea7b684a217f0c	14	20	18	21	16	16	23	0	21	26	21	29	Bacteria	Cyanobacteria	Cyanobacteriia	Cyanobacteriales	Nostocaceae	Nostoc_PCC-73102	unidentified
0bb068192ee37e0eca36e2ef12d370e3	14	0	28	22	17	19	26	22	26	0	24	27	Bacteria	Actinobacteriota	Actinobacteria	Corynebacteriales	Nocardiaceae	unidentified	unidentified
205715bac080a6cff10e9ae6a1cf396a	6	38	25	8	8	10	52	30	10	28	5	5	Bacteria	Actinobacteriota	Actinobacteria	Streptomycetales	Streptomycetaceae	Streptomyces	unidentified
6e4718470a9ebb4981c9aee80aa5e58e	28	0	19	0	52	38	25	0	27	0	35	0	Bacteria	Proteobacteria	Alphaproteobacteria	Sphingomonadales	Sphingomonadaceae	Sphingomonas	unidentified
a9e1702aab064bc83aeceee17afb765d	16	0	20	26	14	27	33	12	21	17	17	21	Bacteria	Chloroflexi	Chloroflexia	Thermomicrobiales	JG30-KF-CM45	JG30-KF-CM45	uncultured_bacterium
358029e41729589c132770927acbd0b7	20	17	30	0	36	20	16	0	36	16	0	32	Bacteria	Actinobacteriota	Rubrobacteria	Rubrobacterales	Rubrobacteriaceae	Rubrobacter	metagenome
ab536861f69480205a730913e88905a9	0	22	23	22	0	21	17	17	29	18	27	27	Bacteria	Actinobacteriota	Actinobacteria	Pseudonocardiales	Pseudonocardiaceae	Pseudonocardia	uncultured_bacterium
3be5a1c7e8b05768efe01ee28240c9eb	0	17	39	36	28	0	29	0	43	0	31	0	Bacteria	Gemmatimonadota	Gemmatimonadetes	Gemmatimonadales	Gemmatimonadaceae	uncultured	unidentified
c6555b82565b8003e49c83607e14c00d	0	0	0	71	0	0	0	53	52	0	0	47	Bacteria	Cyanobacteria	Cyanobacteriia	Chloroplast	Chloroplast	Chloroplast	Tetradesmus_obliquus
711941dc3db0597d22b96ab4724e54dc	31	7	23	24	21	8	12	17	26	18	15	20	Bacteria	Proteobacteria	Alphaproteobacteria	Elsterales	uncultured	uncultured	unidentified
0970ca5f08dbe667275d92b78a1279bb	22	14	21	20	15	16	24	12	23	17	21	17	Bacteria	Chloroflexi	Anaerolineae	RBG-13-54-9	RBG-13-54-9	RBG-13-54-9	unidentified
5f1c3a8ecacbc22d92ba805e77bc0040	21	0	30	18	22	20	12	13	19	25	20	22	Bacteria	Proteobacteria	Alphaproteobacteria	Rhodobacterales	Rhodobacteraceae	Amaricoccus	uncultured_bacterium
e6f3140f9abf776b8e5a420092380029	28	21	19	25	21	17	0	26	18	22	0	23	Bacteria	Actinobacteriota	Actinobacteria	Propionibacteriales	Propionibacteriaceae	unidentified	unidentified
3ba2fe241972d25a0b63ad33aa37e672	19	0	25	20	19	0	28	0	36	33	18	22	Bacteria	Chloroflexi	Anaerolineae	Anaerolineales	Anaerolineaceae	UTCFX1	uncultured_bacterium
674870cb9582c3c3ca4847a9475cc204	27	18	26	24	24	15	0	24	25	0	18	18	Bacteria	Actinobacteriota	Actinobacteria	Propionibacteriales	Propionibacteriaceae	Microlunatus	uncultured_actinobacterium
c51ff718ab8a0f25166abe3eb8ca2485	24	18	20	23	19	11	17	13	16	10	30	18	Bacteria	Actinobacteriota	Actinobacteria	Frankiales	Nakamurellaceae	Nakamurella	Nakamurella_multipartita
615f178b6b9926012f5218b1a9063fd3	16	0	28	27	31	32	30	26	28	0	0	0	Bacteria	Proteobacteria	Alphaproteobacteria	Azospirillales	Azospirillaceae	Skermanella	unidentified
2d226edf732204f4eec6c232dafe9367	0	17	0	32	25	0	0	25	37	31	22	29	Bacteria	Proteobacteria	Alphaproteobacteria	Rhizobiales	Xanthobacteraceae	Bradyrhizobium	unidentified
f9d039e4c6456d56e68c5c43579d4bfb	0	0	12	18	12	26	19	51	20	43	0	15	Bacteria	Actinobacteriota	Actinobacteria	Micrococcales	Microbacteriaceae	Microbacterium	unidentified
8c2a339474cb878afc42822a1b1ac634	33	0	23	22	0	36	21	0	29	21	0	30	Bacteria	Actinobacteriota	Actinobacteria	Micrococcales	Microbacteriaceae	unidentified	unidentified
e412e69da9ebf0ca57ba0e7c9ac1094b	17	0	43	0	20	0	24	31	19	25	24	12	Bacteria	Cyanobacteria	Cyanobacteriia	Chloroplast	Chloroplast	Chloroplast	unidentified
b6895220c3ef20cc5b64950dfc00f2ef	0	0	37	23	37	0	13	15	0	30	27	33	Bacteria	Proteobacteria	Alphaproteobacteria	Rhizobiales	Rhizobiaceae	Allorhizobium-Neorhizobium-Pararhizobium-Rhizobium	unidentified
cf981abd1c88cfc9a1e493dfeb0ddf15	25	13	13	23	0	0	29	22	24	27	18	20	Bacteria	Actinobacteriota	Acidimicrobiia	Microtrichales	Ilumatobacteraceae	CL500-29_marine_group	metagenome
9cba162445cd3a24d70f583f7c8038f7	24	18	22	29	19	30	28	21	21	0	0	1	Bacteria	Actinobacteriota	Actinobacteria	Propionibacteriales	Nocardioidaceae	Marmoricola	unidentified
cd2784d0be13c3158d16f5b398027a51	16	0	0	25	26	24	20	0	38	42	0	22	Bacteria	Chloroflexi	Chloroflexia	Chloroflexales	Roseiflexaceae	uncultured	unidentified
a41c3af34cc1fe432a4f64950a42cc18	0	33	28	31	39	0	34	29	0	0	0	19	Bacteria	Proteobacteria	Alphaproteobacteria	Rickettsiales	Mitochondria	Mitochondria	Silene_dioica
66d3801ee4d04d04e37b5ba2fe944a9f	0	20	33	33	0	0	27	0	42	34	24	0	Bacteria	Actinobacteriota	Actinobacteria	Micromonosporales	Micromonosporaceae	Dactylosporangium	unidentified
02e0dd40593197a07f4e967af36cdf79	0	19	36	0	35	25	21	0	21	0	24	30	Bacteria	Proteobacteria	Alphaproteobacteria	Rhizobiales	Beijerinckiaceae	Microvirga	unidentified
c9bb8757b54b6a57e9197f9ab43d6836	29	40	12	14	31	0	28	0	36	0	20	0	Bacteria	Actinobacteriota	Actinobacteria	Frankiales	uncultured	uncultured	metagenome
f8409b9a8f46cf7944a11f27ba57ae4e	12	13	22	17	28	11	18	14	22	17	29	7	Bacteria	Proteobacteria	Alphaproteobacteria	Acetobacterales	Acetobacteraceae	uncultured	uncultured_Paracraurococcus
43495d3063b9fb857d719581a1444feb	36	26	35	29	0	0	0	30	0	24	0	29	Bacteria	Proteobacteria	Alphaproteobacteria	Rhizobiales	Beijerinckiaceae	unidentified	unidentified
c11a41dd1dcb13e34959bddf54e494ce	11	27	0	0	25	24	30	0	40	0	24	28	Bacteria	Cyanobacteria	Cyanobacteriia	Chloroplast	Chloroplast	Chloroplast	unidentified
e32e057194318ab63724e26b119070f9	24	0	0	25	0	12	26	20	40	24	17	20	Bacteria	Actinobacteriota	Acidimicrobiia	IMCC26256	IMCC26256	IMCC26256	uncultured_Ferrimicrobium
71701e302e9de95b73a30bcbcf45646f	29	0	0	50	0	46	82	0	0	0	0	0	Bacteria	Proteobacteria	Alphaproteobacteria	Defluviicoccales	Defluviicoccaceae	Defluviicoccus	uncultured_Defluviicoccus
a4a3c3da59fd898959b60f3f406b56c1	26	24	0	25	0	44	0	44	0	43	1	0	Bacteria	Actinobacteriota	Actinobacteria	Propionibacteriales	Nocardioidaceae	Marmoricola	unidentified
6f50829c53977f7b5bf8d669e7448311	19	0	9	41	16	21	0	15	24	22	21	19	Bacteria	Chloroflexi	TK10	TK10	TK10	TK10	unidentified
0b8c7236d6203deb42bb5469cc344bc8	18	16	15	16	0	20	33	29	20	0	13	27	Bacteria	Chloroflexi	Chloroflexia	Kallotenuales	AKIW781	AKIW781	uncultured_bacterium
efef6b26689f2590a73020f5377ef579	17	11	18	23	21	17	19	17	12	16	13	23	Bacteria	Actinobacteriota	Actinobacteria	Propionibacteriales	Nocardioidaceae	Nocardioides	uncultured_bacterium
30a786cd45ff406d3970f8fe5b0f176e	0	29	16	0	26	16	39	34	23	8	15	0	Bacteria	Bacteroidota	Bacteroidia	Flavobacteriales	Flavobacteriaceae	Flavobacterium	unidentified
22b08373d0992eee2742e0ab35591722	20	0	0	30	18	31	26	20	20	20	0	20	Bacteria	Actinobacteriota	Actinobacteria	Pseudonocardiales	Pseudonocardiaceae	Pseudonocardia	unidentified
2dd85664565de678f84a60e4731ea591	25	15	28	15	14	19	1	22	23	21	0	21	Bacteria	Gemmatimonadota	Gemmatimonadetes	Gemmatimonadales	Gemmatimonadaceae	unidentified	unidentified
6b3a313f8fceefe605235cb49f1bfd32	17	22	23	15	34	0	18	0	36	18	0	21	Bacteria	Gemmatimonadota	Gemmatimonadetes	Gemmatimonadales	Gemmatimonadaceae	uncultured	unidentified
06d496f9ca504efcf9a5417c8446b273	12	11	24	27	24	15	20	17	13	18	11	12	Bacteria	Actinobacteriota	Actinobacteria	Micrococcales	Microbacteriaceae	Microbacterium	unidentified
d554d74a177e236c5b1e6ac20bf0a3fe	0	35	26	24	15	0	21	23	0	3	22	35	Bacteria	Proteobacteria	Alphaproteobacteria	Sphingomonadales	Sphingomonadaceae	Altererythrobacter	unidentified
1f8a6a2243be8edb8a758f4e5a743302	0	11	0	21	20	19	23	16	25	21	23	25	Bacteria	Actinobacteriota	Actinobacteria	Propionibacteriales	Nocardioidaceae	Nocardioides	unidentified
a848fa44f6adfd967102e4b7d294fe64	17	0	33	17	22	15	20	18	15	17	13	16	Bacteria	Chloroflexi	Anaerolineae	Caldilineales	Caldilineaceae	uncultured	unidentified
5a7f28ebb64f0ebd46a90bb7c1bb0e9c	53	0	26	51	0	0	0	30	0	41	0	0	Bacteria	Actinobacteriota	Actinobacteria	Pseudonocardiales	Pseudonocardiaceae	Lechevalieria	unidentified
bac21e07f5034d043d17e7a57f76f7bd	0	0	19	41	1	36	30	15	0	36	23	0	Bacteria	Cyanobacteria	Cyanobacteriia	Chloroplast	Chloroplast	Chloroplast	Bacillaria_paxillifer
9ab433c1c7a6a8a66785423ff7c6bd7f	30	27	0	21	30	0	24	12	0	24	0	31	Bacteria	Actinobacteriota	Acidimicrobiia	Microtrichales	Ilumatobacteraceae	uncultured	uncultured_bacterium
b1115883fbba8605f07ea24f1ad8dda0	0	13	41	0	61	0	12	12	20	7	22	11	Bacteria	Bacteroidota	Bacteroidia	Flavobacteriales	Flavobacteriaceae	Flavobacterium	unidentified
3886ef40460325471d3f170d8e802523	18	0	15	30	13	16	28	20	18	9	12	18	Bacteria	Actinobacteriota	Actinobacteria	Propionibacteriales	Nocardioidaceae	Kribbella	Kribbella_karoonensis
9bf6191ef441b9bfcebf9308d1188b0d	15	16	21	13	15	18	17	15	17	14	17	19	Bacteria	Proteobacteria	Alphaproteobacteria	Tistrellales	Geminicoccaceae	Candidatus_Alysiosphaera	metagenome
5b833a9e5f6cec5952efa0675b7f6769	31	0	0	0	0	0	63	49	0	0	53	0	Bacteria	Chloroflexi	KD4-96	KD4-96	KD4-96	KD4-96	uncultured_Chloroflexi
819a48ef4aa39a7bd6197aa0fdfdb2fc	14	14	14	14	16	21	23	7	31	12	13	17	Bacteria	Actinobacteriota	Acidimicrobiia	Microtrichales	uncultured	uncultured	uncultured_bacterium
bb596f7373e928a9d792003fd055330c	0	15	0	24	0	17	25	25	29	18	21	22	Bacteria	Chloroflexi	KD4-96	KD4-96	KD4-96	KD4-96	uncultured_bacterium
d35c7d9e3b705563bda5f64134500849	29	0	27	0	0	22	35	0	28	0	31	23	Bacteria	Bacteroidota	Bacteroidia	Cytophagales	Hymenobacteraceae	Hymenobacter	unidentified
12cffa87cb55c70e95f61310e697f878	21	0	0	16	27	32	37	11	0	0	26	25	Bacteria	Armatimonadota	Fimbriimonadia	Fimbriimonadales	Fimbriimonadaceae	Fimbriimonadaceae	uncultured_bacterium
b4c59303b883a7721786b54adfd04138	0	13	16	22	25	18	19	20	0	22	17	23	Bacteria	Acidobacteriota	Blastocatellia	11-24	11-24	11-24	uncultured_bacterium
b8199856832ebf981ad84e79964ff23b	34	34	0	33	0	30	0	30	0	0	0	33	Bacteria	Acidobacteriota	Blastocatellia	Blastocatellales	Blastocatellaceae	JGI_0001001-H03	unidentified
865ca5f7072f3ab007905f1ab898ed27	29	0	47	0	0	14	36	0	28	0	0	39	Bacteria	Acidobacteriota	Blastocatellia	Blastocatellales	Blastocatellaceae	JGI_0001001-H03	unidentified
5e17ae4fcc77ba5c35d60b6dd0dd9da2	14	15	25	20	18	20	22	11	17	7	12	12	Bacteria	Armatimonadota	Fimbriimonadia	Fimbriimonadales	Fimbriimonadales	Fimbriimonadales	uncultured_soil
f50df1bb2a09bcd3f1c6fef1ffaeef3c	0	0	40	0	25	0	48	19	0	0	37	24	Bacteria	Bacteroidota	Bacteroidia	Flavobacteriales	Flavobacteriaceae	Flavobacterium	uncultured_soil
be9dd1135676b3bdf17c5a910f2581ec	0	0	0	0	42	0	30	38	0	0	40	43	Bacteria	Actinobacteriota	Actinobacteria	Micromonosporales	Micromonosporaceae	Actinoplanes	unidentified
3ead9cc423c7027b19cf2c06cf20c000	0	0	0	0	0	0	65	46	0	37	0	45	Bacteria	Actinobacteriota	MB-A2-108	MB-A2-108	MB-A2-108	MB-A2-108	unidentified
6f13948c1e66b1a11bc382c225df3e91	0	0	36	48	44	0	0	0	30	0	0	34	Bacteria	Proteobacteria	Alphaproteobacteria	Rhizobiales	Xanthobacteraceae	Rhodoplanes	unidentified
29911e05a6c0ebd4397c3261a0230e68	0	0	33	0	37	29	0	0	38	0	26	29	Bacteria	Actinobacteriota	Actinobacteria	Propionibacteriales	Nocardioidaceae	unidentified	unidentified
5067465c8abeb06b589ce1440bd9d7a5	23	18	29	23	32	0	6	0	0	36	0	24	Bacteria	Gemmatimonadota	Gemmatimonadetes	Gemmatimonadales	Gemmatimonadaceae	uncultured	unidentified
355c1443034d068eba31589014efd62a	23	0	27	0	0	0	38	26	17	31	0	29	Bacteria	Actinobacteriota	MB-A2-108	MB-A2-108	MB-A2-108	MB-A2-108	unidentified
4b716a9f7fa1edcdad54da432cecb71a	23	0	23	25	31	30	31	0	27	0	0	0	Bacteria	Acidobacteriota	Blastocatellia	Blastocatellales	Blastocatellaceae	unidentified	unidentified
57e778342676c50d93a4e77d5cfece09	0	0	24	22	14	0	25	0	23	42	22	17	Bacteria	Actinobacteriota	Actinobacteria	Frankiales	Nakamurellaceae	Nakamurella	unidentified
83c2373ef8c3fdfe592be6826e1fe2e7	25	0	23	0	29	15	0	27	0	23	21	25	Bacteria	Chloroflexi	KD4-96	KD4-96	KD4-96	KD4-96	uncultured_bacterium
80525504983a488ba8321e3787e8278f	22	16	24	13	20	15	0	14	18	12	15	19	Bacteria	Cyanobacteria	Cyanobacteriia	Cyanobacteriales	Nostocaceae	Nostoc_PCC-73102	unidentified
7c1c4c706d56836f35dca09509705945	0	14	15	23	20	22	26	0	29	0	15	23	Bacteria	Actinobacteriota	Actinobacteria	Corynebacteriales	Mycobacteriaceae	Mycobacterium	unidentified
805ba6152f9726b844dd79d8cddf1e0f	35	0	23	14	31	0	20	0	25	0	17	21	Bacteria	Proteobacteria	Alphaproteobacteria	Sphingomonadales	Sphingomonadaceae	Sphingomonas	unidentified
2a22f779c2b5c9dd85d6292c76224be8	33	0	29	34	0	0	0	21	35	33	0	0	Bacteria	Proteobacteria	Alphaproteobacteria	Caulobacterales	Caulobacteraceae	Phenylobacterium	unidentified
b51a338442f7add72acf846487e6d275	18	10	20	15	15	9	15	14	14	20	19	15	Bacteria	Proteobacteria	Alphaproteobacteria	Rhizobiales	Rhizobiaceae	Mesorhizobium	unidentified
5e4ba1c9cda4e94b0247c67c08bf5078	12	16	30	0	7	24	25	0	24	12	18	16	Bacteria	Proteobacteria	Alphaproteobacteria	uncultured	uncultured	uncultured	uncultured_Rhodospirillales
f4146aab883d6153e9027d817455048d	0	57	0	0	0	0	43	0	84	0	0	0	Bacteria	Actinobacteriota	MB-A2-108	MB-A2-108	MB-A2-108	MB-A2-108	unidentified
71b6ea146b48a4d3bfdfed3c84fc4a57	0	44	65	0	0	0	0	0	41	0	0	34	Bacteria	Actinobacteriota	Actinobacteria	Micromonosporales	Micromonosporaceae	Actinoplanes	unidentified
b960eb3cec2fbdb3885202d2f02d6f72	18	16	19	0	30	19	0	0	20	16	22	23	Bacteria	Actinobacteriota	Acidimicrobiia	IMCC26256	IMCC26256	IMCC26256	unidentified
b47a953865b43bdf5c8701947d07ea85	36	0	0	28	33	25	0	0	0	0	27	33	Bacteria	Actinobacteriota	Actinobacteria	Streptomycetales	Streptomycetaceae	Streptomyces	unidentified
8e9c38f4e26474e9c22bd22dfbb63f2c	0	1	50	48	0	0	0	41	0	40	0	0	Bacteria	Actinobacteriota	Actinobacteria	Micrococcales	Intrasporangiaceae	Oryzihumus	Oryzihumus_terrae
5e2c8cff2493ea492f165305841e5fd3	26	19	4	7	12	20	2	13	27	13	26	10	Bacteria	Bacteroidota	Bacteroidia	Cytophagales	Hymenobacteraceae	Adhaeribacter	Adhaeribacter_terrae
ac4bba0bf8119d73143da0e1bd57af86	17	19	45	15	40	30	0	0	0	0	13	0	Bacteria	Chloroflexi	Chloroflexia	Chloroflexales	Herpetosiphonaceae	Herpetosiphon	unidentified
9c38c7616f833857be0bdbd3ff97a46d	0	34	27	0	37	0	0	0	0	44	0	37	Bacteria	Actinobacteriota	Actinobacteria	Frankiales	Nakamurellaceae	Nakamurella	uncultured_Nakamurellaceae
2a58edf3b7651ee2b00c467dbe58561f	24	18	15	13	5	22	10	0	22	19	11	19	Bacteria	Acidobacteriota	Blastocatellia	Blastocatellales	Blastocatellaceae	Stenotrophobacter	Stenotrophobacter_terrae
3541b8be81e110081ab897abe8459d3d	0	0	53	0	47	0	0	0	0	31	0	47	Bacteria	Actinobacteriota	Acidimicrobiia	Microtrichales	Ilumatobacteraceae	Ilumatobacter	metagenome
7e578bc3800615bf46da8859799e351f	27	16	0	31	26	1	0	0	24	19	20	13	Bacteria	Actinobacteriota	Actinobacteria	Propionibacteriales	Nocardioidaceae	Marmoricola	unidentified
a91633f6f339216188797c9748b1cfbb	25	42	26	30	0	0	27	0	27	0	0	0	Bacteria	Actinobacteriota	Actinobacteria	Frankiales	Nakamurellaceae	Nakamurella	unidentified
b4acecba5db425320ce2fd3478f619b3	19	0	21	0	28	0	0	27	32	0	18	32	Bacteria	Proteobacteria	Alphaproteobacteria	Azospirillales	Azospirillaceae	Skermanella	unidentified
7cfcfd009162a543d5124ce500065e4f	0	14	13	14	19	20	17	17	16	18	14	15	Bacteria	Proteobacteria	Alphaproteobacteria	Acetobacterales	Acetobacteraceae	uncultured	uncultured_Paracraurococcus
6cceea8dd5880d1146b5f7bc807086f9	21	0	57	0	22	0	26	20	0	12	0	18	Bacteria	Actinobacteriota	Actinobacteria	Pseudonocardiales	Pseudonocardiaceae	Pseudonocardia	unidentified
def0ca024e28656bea22815780100476	16	11	0	18	20	17	15	19	19	0	22	19	Bacteria	Chloroflexi	KD4-96	KD4-96	KD4-96	KD4-96	uncultured_bacterium
196c54abbc89673ca3739f703c6c4cf9	0	0	43	0	31	4	0	0	27	13	29	29	Bacteria	Actinobacteriota	Actinobacteria	Propionibacteriales	Nocardioidaceae	Nocardioides	Nocardioides_terrigena
995fbb12138967724715461927357d9b	26	23	0	0	49	0	32	22	0	0	0	23	Bacteria	Actinobacteriota	Actinobacteria	Kineosporiales	Kineosporiaceae	unidentified	unidentified
8f91b66e45da3d63f72b8d21610bd450	15	0	22	23	20	19	0	24	15	0	16	21	Bacteria	Cyanobacteria	Cyanobacteriia	Chloroplast	Chloroplast	Chloroplast	unidentified
d15f8baa2d7b46c9e2ccb763fcfac6ef	12	11	24	14	18	0	18	16	14	14	16	18	Bacteria	Proteobacteria	Alphaproteobacteria	Rhizobiales	Beijerinckiaceae	Microvirga	unidentified
98ced35e83f6c9dbd6c1e149d458aab9	8	22	0	1	0	26	17	28	0	27	43	2	Bacteria	Actinobacteriota	Actinobacteria	Micrococcales	Microbacteriaceae	Microbacterium	unidentified
03f0f26928444744896608ab11c8c4d8	0	17	15	15	26	12	18	13	19	0	10	28	Bacteria	Actinobacteriota	Actinobacteria	Streptomycetales	Streptomycetaceae	Streptomyces	unidentified
08e682ea9087c138ee84d5d06fad36a6	17	0	30	16	21	0	27	0	27	0	0	34	Bacteria	Actinobacteriota	Actinobacteria	Micrococcales	Microbacteriaceae	Microbacterium	unidentified
9f0cc48cf3d6d6ab402b832411297c3a	12	13	16	14	11	17	24	15	24	9	0	17	Bacteria	Proteobacteria	Alphaproteobacteria	Rhizobiales	Rhizobiaceae	unidentified	unidentified
2666d681552bbbf5aef307fbb8441f27	8	8	15	17	19	16	12	10	10	15	14	28	Bacteria	Planctomycetota	Phycisphaerae	Tepidisphaerales	WD2101_soil_group	WD2101_soil_group	unidentified
c15d123334cb1c5fd76269196c583694	0	17	0	24	15	0	0	23	25	21	22	25	Bacteria	Proteobacteria	Alphaproteobacteria	Rhizobiales	Xanthobacteraceae	Bradyrhizobium	unidentified
83c3a62996bb248838a78ea0e1f83819	8	8	0	10	30	11	11	10	25	14	35	9	Bacteria	Actinobacteriota	Actinobacteria	Micrococcales	Intrasporangiaceae	Humibacillus	uncultured_bacterium
d10f3df13177ac3718f065b9025b79b5	0	0	31	22	0	26	24	15	30	0	0	21	Bacteria	Proteobacteria	Alphaproteobacteria	Rhizobiales	Xanthobacteraceae	uncultured	unidentified
35bba83a4a5e73891ea7cdc9b717ad08	0	0	0	0	0	0	100	0	0	69	0	0	Bacteria	Proteobacteria	Alphaproteobacteria	Azospirillales	Azospirillaceae	Skermanella	unidentified
56f36254dea71240125dd5d216a25e56	16	0	0	27	29	25	0	0	0	18	20	33	Bacteria	Gemmatimonadota	Gemmatimonadetes	Gemmatimonadales	Gemmatimonadaceae	uncultured	unidentified
4b0cb9cf157581214035d332b623cafe	14	11	22	0	10	8	18	10	27	14	16	18	Bacteria	Chloroflexi	Anaerolineae	SBR1031	SBR1031	SBR1031	metagenome
0df8b090192d78e1be934e7c7a0a35e3	14	14	21	11	8	22	17	20	3	12	14	12	Bacteria	Planctomycetota	Phycisphaerae	Tepidisphaerales	WD2101_soil_group	WD2101_soil_group	unidentified
4e8a18e32c7dde295263902fffa834d0	13	14	0	10	13	24	10	11	31	10	15	17	Bacteria	Actinobacteriota	Actinobacteria	Micrococcales	Intrasporangiaceae	Intrasporangium	uncultured_bacterium
0abb96c4241f1540973997593fdd01d4	11	12	27	19	0	0	17	0	25	26	20	11	Bacteria	Firmicutes	Clostridia	Peptostreptococcales-Tissierellales	Peptostreptococcaceae	Sporacetigenium	Sporacetigenium_mesophilum
2055afbb45172f9682ed9bedee8694f7	26	16	0	19	14	0	0	1	35	29	14	13	Bacteria	Actinobacteriota	Actinobacteria	Propionibacteriales	Nocardioidaceae	Marmoricola	unidentified
57ef99896fbc0daceb593bcf53cb3c71	15	14	11	0	13	10	27	15	18	18	10	16	Bacteria	Gemmatimonadota	Gemmatimonadetes	Gemmatimonadales	Gemmatimonadaceae	Gemmatimonas	unidentified
5c6ef0bb84490a73ba375997ec88f3c7	16	0	0	0	17	27	29	20	22	0	14	21	Bacteria	Gemmatimonadota	Gemmatimonadetes	Gemmatimonadales	Gemmatimonadaceae	uncultured	uncultured_Gemmatimonadetes
6e3f6f48eb8c27d177356a9bda711e6e	12	21	0	34	0	14	34	21	17	0	0	13	Bacteria	Actinobacteriota	Acidimicrobiia	Microtrichales	Ilumatobacteraceae	uncultured	uncultured_Acidimicrobiaceae
c969e7539fe5b9043b11c614a36ebc5e	15	12	14	17	10	18	11	14	17	12	13	12	Bacteria	Proteobacteria	Alphaproteobacteria	Elsterales	uncultured	uncultured	unidentified
192b0c10e0fc6400ae5d10a59c8c3a5a	20	19	30	13	0	0	31	0	0	0	25	26	Bacteria	Proteobacteria	Alphaproteobacteria	Sphingomonadales	Sphingomonadaceae	Sphingomonas	unidentified
0801b106603d4c46260e50983e423f59	0	0	25	0	0	22	28	0	34	14	18	23	Bacteria	Proteobacteria	Alphaproteobacteria	Rhizobiales	uncultured	uncultured	uncultured_Alphaproteobacteria
b876bf6d8410e5251d8cdd99780035b9	37	0	36	0	0	0	0	35	13	0	0	42	Bacteria	Planctomycetota	Phycisphaerae	Tepidisphaerales	WD2101_soil_group	WD2101_soil_group	unidentified
f033391d3ed6a3217962dc1631fb5bda	19	0	0	23	27	23	13	0	20	19	7	12	Bacteria	Planctomycetota	Phycisphaerae	Tepidisphaerales	WD2101_soil_group	WD2101_soil_group	uncultured_bacterium
cd0f1279dc44e2905a22375747a42512	16	10	15	23	13	20	21	16	22	0	7	0	Bacteria	Cyanobacteria	Cyanobacteriia	Cyanobacteriales	Nostocaceae	Nostoc_PCC-7524	Trichormus_variabilis
b544ce1bc9c873c4f48c0871146081b6	0	20	0	0	30	33	25	0	28	0	27	0	Bacteria	Cyanobacteria	Cyanobacteriia	Cyanobacteriales	Nostocaceae	unidentified	unidentified
dfb8746aacb1ac70ca4b76d6a82bbace	18	8	24	0	13	13	21	0	16	18	10	21	Bacteria	Gemmatimonadota	Gemmatimonadetes	Gemmatimonadales	Gemmatimonadaceae	Gemmatimonas	uncultured_bacterium
d76b3a1d3463be47fc0b03dde48cce8f	23	14	0	0	20	0	17	17	28	0	22	20	Bacteria	Chloroflexi	Anaerolineae	SBR1031	SBR1031	SBR1031	uncultured_bacterium
8dcdeddbd9f127dce012254401fa60b1	10	20	0	28	37	13	18	3	13	0	17	2	Bacteria	Proteobacteria	Alphaproteobacteria	Rhodobacterales	Rhodobacteraceae	Amaricoccus	uncultured_bacterium
59f640bbbc237f0749da4888e64c065e	0	0	45	29	0	34	34	0	0	0	0	19	Bacteria	Proteobacteria	Alphaproteobacteria	Rhizobiales	Xanthobacteraceae	uncultured	unidentified
4b8c33d6fddf18df901937dd6cc20520	0	0	21	15	10	23	18	14	21	10	15	13	Bacteria	Proteobacteria	Alphaproteobacteria	Rhizobiales	Rhizobiaceae	unidentified	unidentified
ffdfd6b90a171268e384cf9addad5978	33	0	0	0	0	32	31	0	41	22	0	0	Bacteria	Proteobacteria	Alphaproteobacteria	Rhizobiales	KF-JG30-B3	KF-JG30-B3	unidentified
2ad23ae03ea7015f306418537074856b	11	17	13	14	12	20	12	14	17	0	16	13	Bacteria	Actinobacteriota	Actinobacteria	Micrococcales	Microbacteriaceae	Microbacterium	unidentified
debfce43528a78f31045c5938880914d	0	0	0	33	25	24	28	0	27	0	0	22	Bacteria	Proteobacteria	Alphaproteobacteria	Rhizobiales	Methyloligellaceae	uncultured	unidentified
c12d76d070de616ff77c51e63de28090	0	0	0	0	59	0	40	0	0	39	0	21	Bacteria	Actinobacteriota	Actinobacteria	Frankiales	Frankiales	Frankiales	uncultured_bacterium
6ce263333820e8f269f21abdcc8f4a2b	61	0	25	0	35	0	0	37	0	0	0	0	Bacteria	Proteobacteria	Alphaproteobacteria	Azospirillales	Azospirillaceae	Skermanella	unidentified
8415b4fb0de8db2fd9e35c0b976e372c	0	16	16	11	0	23	18	18	17	20	0	19	Bacteria	Proteobacteria	Alphaproteobacteria	Rhodobacterales	Rhodobacteraceae	Amaricoccus	uncultured_bacterium
647d240268d193e1aeae34f4f8c8653f	13	10	21	17	16	0	16	15	15	20	14	0	Bacteria	Chloroflexi	JG30-KF-CM66	JG30-KF-CM66	JG30-KF-CM66	JG30-KF-CM66	uncultured_bacterium
f67c89f1e2b596640aedeeab02524247	25	13	21	0	0	0	0	9	23	25	15	24	Bacteria	Proteobacteria	Alphaproteobacteria	Rhizobiales	Rhizobiaceae	Allorhizobium-Neorhizobium-Pararhizobium-Rhizobium	unidentified
33ecafe29dd8d88f2482f938f89bd371	24	0	27	0	26	22	21	0	14	0	0	21	Bacteria	Proteobacteria	Alphaproteobacteria	Rhizobiales	Hyphomicrobiaceae	Pedomicrobium	unidentified
ab6b37f88562b245c6d37111d378a639	19	0	13	15	17	20	17	8	17	0	17	11	Bacteria	Planctomycetota	Phycisphaerae	Tepidisphaerales	WD2101_soil_group	WD2101_soil_group	unidentified
ae2d6d9b8949311104b65945d1638f7f	0	13	13	15	26	0	13	19	18	0	23	14	Bacteria	Proteobacteria	Alphaproteobacteria	Rhizobiales	Xanthobacteraceae	uncultured	unidentified
9b4407837f2cbb2ec82410cb32663a70	39	0	0	0	0	0	54	34	0	26	0	0	Bacteria	Actinobacteriota	Actinobacteria	Propionibacteriales	Nocardioidaceae	Nocardioides	Kribbella_sp.
bb20dbd8602437ae0b625a809ca97e9c	27	12	0	0	38	0	21	24	0	0	0	31	Bacteria	Actinobacteriota	Actinobacteria	Kineosporiales	Kineosporiaceae	uncultured	uncultured_bacterium
6e35f814bdba213aca9e4ec03141fef4	20	0	14	32	14	9	15	7	12	16	7	7	Bacteria	Actinobacteriota	Actinobacteria	Micromonosporales	Micromonosporaceae	unidentified	unidentified
18e97cda97a4cb8162c8f33d4f587057	0	17	26	0	0	17	21	12	18	0	23	19	Bacteria	Chloroflexi	Chloroflexia	Thermomicrobiales	JG30-KF-CM45	JG30-KF-CM45	unidentified
35c9d725a165ec1cc179b831473f2035	22	11	13	15	0	9	0	0	28	13	28	13	Bacteria	Actinobacteriota	Actinobacteria	Propionibacteriales	Nocardioidaceae	Nocardioides	unidentified
2e133324c9301ab5ae1186716c5867c8	29	29	0	0	34	0	31	0	0	0	28	0	Bacteria	Actinobacteriota	Acidimicrobiia	Microtrichales	uncultured	uncultured	uncultured_bacterium
d518643bdcaed210262e7b27ca4f10f1	17	13	18	16	0	23	0	12	20	18	13	0	Bacteria	Proteobacteria	Alphaproteobacteria	Rhizobiales	Beijerinckiaceae	Methylorosula	unidentified
f5cb8b41fb6398910bb922e81b28fd23	0	0	19	15	28	33	0	0	0	0	33	22	Bacteria	Gemmatimonadota	Gemmatimonadetes	Gemmatimonadales	Gemmatimonadaceae	Gemmatimonas	unidentified
2de8f8e4bc675d656e41cf22690194b1	0	0	0	0	0	33	30	49	0	0	38	0	Bacteria	Proteobacteria	Alphaproteobacteria	Sphingomonadales	Sphingomonadaceae	Altererythrobacter	unidentified
d523b61ca887e689223c707cf692bca9	24	0	27	32	31	35	0	0	0	0	0	0	Bacteria	Actinobacteriota	Actinobacteria	Propionibacteriales	Nocardioidaceae	Nocardioides	Nocardioides_conyzicola
eb062ef09a80d62b797f9e01d6c58e89	12	0	21	26	0	39	27	0	0	24	0	0	Bacteria	Actinobacteriota	Actinobacteria	Micrococcales	Intrasporangiaceae	Terrabacter	unidentified
7b9458ed380253be70c02af78fbc0780	0	10	18	5	24	14	0	10	12	22	15	19	Bacteria	Acidobacteriota	Acidobacteriae	Acidobacteriae	Acidobacteriae	Paludibaculum	metagenome
31c240b82304d6752e285c6d8bee9bc3	0	10	10	10	14	17	16	12	13	19	17	11	Bacteria	Gemmatimonadota	Gemmatimonadetes	Gemmatimonadales	Gemmatimonadaceae	Gemmatimonas	unidentified
c7f19f2b6c4e421163b7b9c1d38ab05b	0	0	35	0	43	0	40	0	31	0	0	0	Bacteria	Proteobacteria	Alphaproteobacteria	Rhizobiales	Beijerinckiaceae	Microvirga	unidentified
27a4d054b8f99f3dcda72557765aa523	0	0	33	0	0	22	0	0	94	0	0	0	Bacteria	Bacteroidota	Bacteroidia	Flavobacteriales	Flavobacteriaceae	Flavobacterium	unidentified
8dddd3ef5e199e758aeefd49e1d97bc5	19	0	0	18	0	13	23	49	0	9	17	0	Bacteria	Actinobacteriota	Actinobacteria	Frankiales	uncultured	uncultured	unidentified
023dcdfb711397dd7e66d29b2cb54a48	19	0	24	0	0	0	20	20	24	0	19	22	Bacteria	Acidobacteriota	Blastocatellia	Blastocatellales	Blastocatellaceae	uncultured	unidentified
6277c894b42eb31d0ae0ea2f99eff761	12	25	0	14	0	28	19	9	10	14	17	0	Bacteria	Acidobacteriota	Blastocatellia	Blastocatellales	Blastocatellaceae	unidentified	unidentified
e090f85dd3ed4779ed401284e1eca56a	0	26	0	0	0	51	0	0	42	29	0	0	Bacteria	Actinobacteriota	Actinobacteria	Micromonosporales	Micromonosporaceae	Actinoplanes	unidentified
09a98ac6fb5a77f900d176431328202e	0	0	7	28	3	20	35	21	6	20	0	8	Bacteria	Actinobacteriota	Actinobacteria	Micrococcales	Microbacteriaceae	Microbacterium	unidentified
2faa44ecf36bddb2fc66a7fa8082369b	0	22	38	0	0	0	33	0	33	0	21	0	Bacteria	Chloroflexi	Anaerolineae	Anaerolineales	Anaerolineaceae	uncultured	uncultured_soil
59fefbc96d48fe0b4dce824d7aafad8c	0	0	25	0	0	0	0	0	37	35	25	25	Bacteria	Chloroflexi	Chloroflexia	Chloroflexales	Roseiflexaceae	uncultured	uncultured_bacterium
aa80b2ff4d60b155ac4245a1d133beba	0	17	16	0	24	39	0	0	26	0	0	24	Bacteria	Actinobacteriota	Actinobacteria	Propionibacteriales	Nocardioidaceae	Nocardioides	unidentified
5df693692dc2acfcdcf6b1a748380e83	0	0	29	32	0	31	0	0	54	0	0	0	Bacteria	Proteobacteria	Alphaproteobacteria	Rhizobiales	Devosiaceae	Devosia	unidentified
f4bb40dc5288f0e820ba9d45c1f3dcea	0	22	0	7	0	13	28	25	0	25	6	19	Bacteria	Actinobacteriota	Actinobacteria	Streptomycetales	Streptomycetaceae	Streptomyces	unidentified
6c93f282ef0bca99ba07d8a381688b99	0	0	1	0	31	31	29	0	23	0	25	3	Bacteria	Proteobacteria	Alphaproteobacteria	Rhizobiales	Beijerinckiaceae	unidentified	unidentified
5d70efd0f4d5a9840778e0ba5b535595	0	0	0	35	24	0	33	0	0	0	0	51	Bacteria	Actinobacteriota	Actinobacteria	Pseudonocardiales	Pseudonocardiaceae	Lechevalieria	unidentified
ac21d73ac3b9aefeb54f105c7caf563a	0	0	0	20	10	0	18	24	21	0	21	29	Bacteria	Chloroflexi	TK10	TK10	TK10	TK10	unidentified
cf3ef4db345dac8bbbec3913d40894e9	17	11	11	0	11	8	19	13	0	15	19	18	Bacteria	Planctomycetota	Phycisphaerae	Tepidisphaerales	WD2101_soil_group	WD2101_soil_group	unidentified
3d0d420696e411c669cd989073c32040	0	9	43	16	8	0	32	0	34	0	0	0	Bacteria	Bacteroidota	Bacteroidia	Flavobacteriales	Flavobacteriaceae	Flavobacterium	unidentified
5fb871a748d1a0909c3a83deda089d9f	24	0	13	16	7	21	15	0	0	18	14	13	Bacteria	Actinobacteriota	Actinobacteria	Micromonosporales	Micromonosporaceae	Virgisporangium	uncultured_actinobacterium
91d09367a5af86eff17747dfbb02cafd	0	31	0	0	40	30	40	0	0	0	0	0	Bacteria	Planctomycetota	Phycisphaerae	Tepidisphaerales	WD2101_soil_group	WD2101_soil_group	unidentified
4fdabea1b433e13b1da15e8e1b9ea18b	0	22	16	23	18	25	0	17	0	0	0	20	Bacteria	Bacteroidota	Bacteroidia	Cytophagales	Hymenobacteraceae	Adhaeribacter	unidentified
89679a11b963ad02e018b0070fe075e5	31	0	0	0	0	21	31	0	37	0	0	20	Bacteria	Proteobacteria	Alphaproteobacteria	Rhodobacterales	Rhodobacteraceae	Amaricoccus	uncultured_bacterium
673190f315896577a4d6c8f070423d47	12	13	0	26	3	16	20	22	0	11	0	17	Bacteria	Actinobacteriota	Actinobacteria	Micrococcales	Intrasporangiaceae	Humibacillus	uncultured_bacterium
a4d993d160693b9568415df3504891ac	50	0	0	0	55	0	0	0	0	0	34	0	Bacteria	Actinobacteriota	Actinobacteria	Propionibacteriales	Nocardioidaceae	Marmoricola	unidentified
c77b85f8ff024d7e16a73a2fba077056	16	0	24	0	13	15	19	8	11	11	0	22	Bacteria	Planctomycetota	Phycisphaerae	Tepidisphaerales	WD2101_soil_group	WD2101_soil_group	uncultured_bacterium
e09c5e4c9ae1fc36eebc6249562493ac	0	8	0	13	11	12	13	17	17	12	15	21	Bacteria	Cyanobacteria	Cyanobacteriia	Chloroplast	Chloroplast	Chloroplast	Ettlia_pseudoalveolaris
d1a34fefc2a1c08bd10ef96239553ead	16	0	18	20	0	16	15	0	17	0	18	18	Bacteria	Chloroflexi	Anaerolineae	SBR1031	A4b	A4b	uncultured_bacterium
623ec1fa8d665807c014897ac15d7cc0	0	18	14	0	0	36	27	20	0	23	0	0	Bacteria	Actinobacteriota	Actinobacteria	Micrococcales	Micrococcaceae	unidentified	unidentified
6b3d98dae839dac76b23dc14973d6945	0	47	0	35	0	0	0	0	0	0	55	0	Bacteria	Proteobacteria	Alphaproteobacteria	Rhizobiales	Xanthobacteraceae	Rhodoplanes	uncultured_bacterium
0fcc6c3ee18d3a556f402de0610288af	0	0	24	0	19	12	14	0	29	7	14	18	Bacteria	Proteobacteria	Alphaproteobacteria	Rhizobiales	uncultured	uncultured	uncultured_Alphaproteobacteria
e48ff6163e745127865a52642f23594b	18	16	14	13	20	0	15	19	21	0	0	0	Bacteria	Planctomycetota	Phycisphaerae	Tepidisphaerales	WD2101_soil_group	WD2101_soil_group	unidentified
3250bdbe10585b7506218fe6a47d60e7	17	23	0	0	29	29	0	0	0	21	17	0	Bacteria	Gemmatimonadota	Gemmatimonadetes	Gemmatimonadales	Gemmatimonadaceae	uncultured	unidentified
f3561732d7dde2475bff681c524edabc	12	10	15	14	17	10	16	12	8	0	11	11	Bacteria	Actinobacteriota	Actinobacteria	Propionibacteriales	Nocardioidaceae	Nocardioides	unidentified
c45201fbd7f2aa539aa83197293ee4e0	0	35	0	0	35	0	0	0	28	0	38	0	Bacteria	Acidobacteriota	Subgroup_11	Subgroup_11	Subgroup_11	Subgroup_11	uncultured_bacterium
9ea3ce8500745ef7d0423163a6edafff	0	0	0	0	59	0	0	9	16	0	0	52	Bacteria	Actinobacteriota	Actinobacteria	Pseudonocardiales	Pseudonocardiaceae	Pseudonocardia	uncultured_bacterium
a06c8e7555e682ce01469720bd5a58fa	16	11	15	18	0	12	17	9	20	0	17	0	Bacteria	Planctomycetota	Phycisphaerae	Tepidisphaerales	WD2101_soil_group	WD2101_soil_group	unidentified
20f82cab80205dcf57a2e05cd5b9e9b3	15	27	28	15	0	0	0	0	32	0	0	18	Bacteria	Gemmatimonadota	Gemmatimonadetes	Gemmatimonadales	Gemmatimonadaceae	Gemmatimonas	uncultured_bacterium
7289545f8974c443bd5dce60a69479de	25	28	0	0	21	0	50	0	0	0	10	0	Bacteria	Bacteroidota	Bacteroidia	Flavobacteriales	Flavobacteriaceae	Flavobacterium	unidentified
2527664377d3af53322624d77eef5b54	18	0	25	18	27	0	24	22	0	0	0	0	Bacteria	Proteobacteria	Alphaproteobacteria	Rhizobiales	Xanthobacteraceae	unidentified	unidentified
6e83e618acc0beb363a7210909c7e493	0	26	0	24	0	0	19	16	0	27	0	22	Bacteria	Gemmatimonadota	Gemmatimonadetes	Gemmatimonadales	Gemmatimonadaceae	uncultured	unidentified
54be04c8767155e72b24dfa30b7c129e	0	0	47	28	0	0	39	20	0	0	0	0	Bacteria	Actinobacteriota	Actinobacteria	Corynebacteriales	Mycobacteriaceae	Mycobacterium	unidentified
9d39ce1b5e7d6753308d964b71783fab	0	0	0	0	0	0	51	0	42	41	0	0	Bacteria	Proteobacteria	Alphaproteobacteria	Rhizobiales	Xanthobacteraceae	unidentified	unidentified
f48f5be2fb1ad40947906d6d969ab72d	24	0	22	24	0	30	0	0	33	0	0	0	Bacteria	Actinobacteriota	Actinobacteria	Propionibacteriales	Nocardioidaceae	Marmoricola	unidentified
20fad088b620e96c5cbe1668f065e4f1	16	0	25	18	15	23	0	0	15	0	0	21	Bacteria	Chloroflexi	TK10	TK10	TK10	TK10	unidentified
d170f1e535ab54c6f10df05122cbd6e1	16	0	25	0	0	19	20	15	21	0	0	17	Bacteria	Proteobacteria	Alphaproteobacteria	Rhodobacterales	Rhodobacteraceae	Amaricoccus	uncultured_bacterium
f4a23681c8f503be566cefe859440c02	16	0	12	2	10	0	14	13	17	8	13	28	Bacteria	Actinobacteriota	Actinobacteria	Micrococcales	unidentified	unidentified	unidentified
75d1c443c4eb757655c3477a7444496d	0	43	0	0	0	0	0	0	0	48	42	0	Bacteria	Actinobacteriota	Actinobacteria	FFCH16263	FFCH16263	FFCH16263	uncultured_bacterium
53ee2b5e6d78d7a629acbed00e30f251	0	0	0	0	0	0	63	0	0	23	47	0	Bacteria	Actinobacteriota	Actinobacteria	Pseudonocardiales	Pseudonocardiaceae	Pseudonocardia	unidentified
6348da70d08737e6ab2617e9eb085485	0	18	0	19	0	28	13	39	0	0	0	15	Bacteria	Cyanobacteria	Cyanobacteriia	Chloroplast	Chloroplast	Chloroplast	unidentified
0477ccbe147137762f0c3d11751bdb26	0	0	0	29	25	32	23	0	23	0	0	0	Bacteria	Planctomycetota	Phycisphaerae	Phycisphaerales	Phycisphaeraceae	AKYG587	uncultured_planctomycete
dded82582f3f67e8e5f46a628f04e339	0	45	0	0	0	17	16	0	14	28	11	0	Bacteria	Proteobacteria	Alphaproteobacteria	Dongiales	Dongiaceae	Dongia	Dongia_rigui
6ed1bdc0bb815ed1fa02690e750ff662	0	0	26	0	0	0	23	0	25	0	35	21	Bacteria	Bacteroidota	Bacteroidia	Flavobacteriales	Flavobacteriaceae	Flavobacterium	unidentified
bcbd0f615c83e233d342028f3fb01464	21	0	0	19	0	17	16	0	0	17	19	20	Bacteria	Acidobacteriota	Subgroup_5	Subgroup_5	Subgroup_5	Subgroup_5	unidentified
7c91ad7f96ce8850a56131e73ef3d3e0	10	10	10	16	17	15	0	5	13	9	11	13	Bacteria	Armatimonadota	Fimbriimonadia	Fimbriimonadales	Fimbriimonadaceae	Fimbriimonadaceae	uncultured_bacterium
9ffb6ae9ed33d4cf38a8283e4b393466	0	0	71	0	0	0	0	0	58	0	0	0	Bacteria	Actinobacteriota	Actinobacteria	Propionibacteriales	Nocardioidaceae	Nocardioides	uncultured_bacterium
313ad1d90965132fe45af390389eeea3	0	0	36	0	0	21	26	46	0	0	0	0	Bacteria	Actinobacteriota	Actinobacteria	Propionibacteriales	Nocardioidaceae	Marmoricola	unidentified
8eb4051a1751a06873d10a92787f7c46	0	0	0	18	24	0	32	0	24	31	0	0	Bacteria	Actinobacteriota	Actinobacteria	Streptomycetales	Streptomycetaceae	Streptomyces	unidentified
94c9565f55ce302bd117da89c1605657	9	0	12	8	17	10	0	0	20	20	14	18	Bacteria	Actinobacteriota	Actinobacteria	Propionibacteriales	Nocardioidaceae	Nocardioides	unidentified
d1fecf102b9119e5b0b2eb93c232f079	33	0	0	21	0	26	22	0	0	0	0	25	Bacteria	Proteobacteria	Alphaproteobacteria	Defluviicoccales	Defluviicoccaceae	Defluviicoccus	uncultured_organism
65fa85a57af74a40367da75d091a375f	24	0	20	23	0	13	23	0	24	0	0	0	Bacteria	Proteobacteria	Gammaproteobacteria	Cellvibrionales	Cellvibrionaceae	Cellvibrio	unidentified
7d974148daf91dae9befc3c78d5d59bd	0	0	0	30	21	0	0	49	27	0	0	0	Bacteria	Chloroflexi	Chloroflexia	Chloroflexales	Roseiflexaceae	uncultured	uncultured_bacterium
93043554b3f942fcb27ce97aaf08d48f	0	27	15	0	0	12	15	17	6	0	0	34	Bacteria	Actinobacteriota	Actinobacteria	Pseudonocardiales	Pseudonocardiaceae	Lechevalieria	unidentified
048534f7003cd5834454d3297b2d6982	0	0	32	0	54	0	0	0	40	0	0	0	Bacteria	Proteobacteria	Alphaproteobacteria	Defluviicoccales	Defluviicoccaceae	Defluviicoccus	uncultured_Defluviicoccus
21410aa8897346ca12a73790491c177c	0	0	0	0	40	0	0	39	0	0	0	47	Bacteria	Actinobacteriota	Actinobacteria	Micrococcales	Microbacteriaceae	Agromyces	unidentified
c273a67a3bbcd552fe7930e60e406464	0	0	0	0	0	30	30	0	30	0	36	0	Bacteria	Gemmatimonadota	Gemmatimonadetes	Gemmatimonadales	Gemmatimonadaceae	uncultured	unidentified
59e1387211c8295bbcd4abcc1d677246	18	20	0	0	0	49	25	0	0	13	0	0	Bacteria	Actinobacteriota	Actinobacteria	Micromonosporales	Micromonosporaceae	Actinoplanes	unidentified
430efc9fbb3f1ee584075a20605fb8d9	14	0	16	19	0	28	14	0	19	0	15	0	Bacteria	Gemmatimonadota	Gemmatimonadetes	Gemmatimonadales	Gemmatimonadaceae	uncultured	unidentified
750f9ba59ad6f5edb6ec001244b3e55a	12	0	15	13	13	10	9	7	12	18	16	0	Bacteria	Cyanobacteria	Cyanobacteriia	Cyanobacteriales	Nostocaceae	Cylindrospermum_PCC-7417	Cylindrospermum_stagnale
091c7d3fd64a41edf722420f673f14e8	12	12	10	0	12	13	15	0	8	15	10	18	Bacteria	Proteobacteria	Alphaproteobacteria	Tistrellales	Geminicoccaceae	Candidatus_Alysiosphaera	metagenome
a71236fc3401ed29d2896a53278a0613	0	0	26	17	0	22	35	0	0	0	0	25	Bacteria	Chloroflexi	KD4-96	KD4-96	KD4-96	KD4-96	unidentified
b1de91f3f3aa8a14969d7d4d599d0798	0	0	13	31	0	13	1	0	16	29	22	0	Bacteria	Actinobacteriota	Actinobacteria	Kineosporiales	Kineosporiaceae	unidentified	unidentified
4d2c27854cc5de275ed803f15f2133e4	0	0	0	17	23	0	0	26	18	28	0	13	Bacteria	Actinobacteriota	Actinobacteria	Propionibacteriales	Nocardioidaceae	Kribbella	unidentified
ac699add8b1b853d8b5f4b06bc22eb28	31	0	40	0	0	23	0	0	0	30	0	0	Bacteria	Chloroflexi	Chloroflexia	Chloroflexales	Roseiflexaceae	uncultured	uncultured_bacterium
23f003791e9ae5cd35748c7f0e5bd2a8	9	0	0	18	14	24	0	28	10	0	13	8	Bacteria	Actinobacteriota	Actinobacteria	Streptomycetales	Streptomycetaceae	Streptomyces	unidentified
e58a5f9ffd501bba4bda9f89ae35503c	0	50	41	0	0	0	33	0	0	0	0	0	Bacteria	Actinobacteriota	Actinobacteria	Pseudonocardiales	Pseudonocardiaceae	Pseudonocardia	uncultured_bacterium
63ee1c530075db2b322b6afbbcaf299d	0	39	0	0	14	0	0	0	32	0	0	39	Bacteria	Chloroflexi	KD4-96	KD4-96	KD4-96	KD4-96	unidentified
d2008a00f78868f1509a7c065565372a	19	0	18	0	0	0	15	23	32	16	0	0	Bacteria	Actinobacteriota	Actinobacteria	Propionibacteriales	Nocardioidaceae	Nocardioides	unidentified
6681836b9f898d6958c319c90bc9dc55	16	14	9	0	0	13	12	7	18	8	11	15	Bacteria	Gemmatimonadota	Gemmatimonadetes	Gemmatimonadales	Gemmatimonadaceae	Gemmatimonas	unidentified
15e40f61772626a23e2df84ee08f8e4d	15	9	15	12	14	0	13	12	12	0	7	14	Bacteria	Chloroflexi	Anaerolineae	Caldilineales	Caldilineaceae	Litorilinea	uncultured_soil
b1508fa768f505978fca9ca361fa066d	12	0	14	0	14	13	18	11	8	11	10	12	Bacteria	Actinobacteriota	Acidimicrobiia	Microtrichales	unidentified	unidentified	unidentified
6d0f2633bd21ec483bfb2f33466e76ad	12	17	20	13	10	0	13	0	11	13	14	0	Bacteria	Proteobacteria	Alphaproteobacteria	Rhodobacterales	Rhodobacteraceae	Amaricoccus	uncultured_bacterium
2d5bdb63119f500c0413e53209316cdc	2	3	38	24	0	6	0	0	3	18	29	0	Bacteria	Actinobacteriota	Actinobacteria	Kineosporiales	Kineosporiaceae	uncultured	uncultured_bacterium
672bef0b9ff2db80e9e9e7627d5e1a55	0	48	18	27	0	0	30	0	0	0	0	0	Bacteria	Chloroflexi	Anaerolineae	SBR1031	A4b	A4b	uncultured_soil
0d9a49079e142ef3d93973b71ea40b2e	0	0	0	0	32	0	15	0	76	0	0	0	Bacteria	Actinobacteriota	Actinobacteria	Kineosporiales	Kineosporiaceae	Kineosporia	uncultured_bacterium
8598106938a1c6c20afa231bc52db6e3	38	0	0	0	0	0	45	0	39	0	0	0	Bacteria	Actinobacteriota	Actinobacteria	Streptomycetales	Streptomycetaceae	Streptomyces	unidentified
522d1c3fadf10634ec8a2dd8cae20dbb	12	18	5	24	27	14	7	0	10	0	0	5	Bacteria	Bacteroidota	Bacteroidia	Flavobacteriales	Flavobacteriaceae	Flavobacterium	uncultured_Flavobacteriaceae
64785690164a4f24d0e2ccf414bd4efd	0	0	55	0	0	0	0	42	0	0	25	0	Bacteria	Actinobacteriota	Actinobacteria	Streptomycetales	Streptomycetaceae	Streptomyces	unidentified
63b6f8733c49e79feb54ccab2ef3c67f	0	0	0	21	0	34	0	0	46	21	0	0	Bacteria	Chloroflexi	TK10	TK10	TK10	TK10	bacterium_Ellin6543
369d4396d5e80888b59137fd4af6e74e	0	0	0	0	60	0	0	0	0	0	0	62	Bacteria	Actinobacteriota	Actinobacteria	Frankiales	Nakamurellaceae	Nakamurella	uncultured_Nakamurellaceae
cd9231cd526c32859165ab7a3542fd92	36	0	0	0	0	0	24	28	0	0	0	33	Bacteria	Actinobacteriota	Actinobacteria	Micromonosporales	Micromonosporaceae	unidentified	unidentified
b4f15db185f5514377b998b91fc022f6	13	10	16	0	17	0	16	0	16	24	9	0	Bacteria	Actinobacteriota	Acidimicrobiia	Microtrichales	uncultured	uncultured	uncultured_bacterium
b323ea4b927ff61651c134e9982345d8	9	12	0	7	8	18	25	13	0	15	0	14	Bacteria	Actinobacteriota	Actinobacteria	Micromonosporales	Micromonosporaceae	unidentified	unidentified
23524fa5fb26a70a85078ab311881f28	0	15	8	8	17	7	18	18	9	12	9	0	Bacteria	Cyanobacteria	Cyanobacteriia	Chloroplast	Chloroplast	Chloroplast	unidentified
9fbbea654b559e725698ab572732ed47	0	0	25	0	0	0	23	0	0	0	73	0	Bacteria	Proteobacteria	Gammaproteobacteria	Burkholderiales	Comamonadaceae	Polaromonas	unidentified
32d98d660d878e626fa09e4496e8dede	0	0	0	0	0	0	48	0	0	0	0	73	Bacteria	Chloroflexi	KD4-96	KD4-96	KD4-96	KD4-96	uncultured_bacterium
bb2a2fb66ab3dfe5af5ac76c0b507651	16	22	0	0	21	0	19	22	0	20	0	0	Bacteria	Bdellovibrionota	Bdellovibrionia	Bdellovibrionales	Bdellovibrionaceae	OM27_clade	metagenome
d3e88b3c943b8f565a76d27b0e44a184	0	17	16	24	0	14	17	0	12	20	0	0	Bacteria	Cyanobacteria	Cyanobacteriia	Chloroplast	Chloroplast	Chloroplast	unidentified
5f81ba4baf44bcf01b69c030546da6d8	0	0	32	33	0	0	20	0	35	0	0	0	Bacteria	Proteobacteria	Alphaproteobacteria	Rhizobiales	Hyphomicrobiaceae	Pedomicrobium	unidentified
559ca577fe1f104b0dbbcceaafa862af	0	0	19	0	26	0	30	0	0	34	0	11	Bacteria	Actinobacteriota	Actinobacteria	Micrococcales	Microbacteriaceae	Leifsonia	unidentified
24d44b144820e41220a7a94b58340142	19	9	10	20	0	0	12	10	24	0	15	0	Bacteria	Chloroflexi	TK10	TK10	TK10	TK10	uncultured_bacterium
5412ab09e99810c91e5bb62195ece471	12	0	10	19	17	10	0	12	0	9	16	14	Bacteria	Bacteroidota	Kapabacteria	Kapabacteriales	Kapabacteriales	Kapabacteriales	uncultured_Chlorobiales
82dc932342c3a5781562efab5100b632	12	21	0	19	15	0	15	0	18	0	0	19	Bacteria	Actinobacteriota	Acidimicrobiia	Microtrichales	Ilumatobacteraceae	Ilumatobacteraceae	uncultured_bacterium
dddc325db593101346fae51ed4317e69	0	13	18	13	10	0	19	0	10	18	8	10	Bacteria	Proteobacteria	Alphaproteobacteria	Rhizobiales	Rhizobiaceae	Allorhizobium-Neorhizobium-Pararhizobium-Rhizobium	unidentified
6e28b1e1e2a7bba076333acf812a483c	19	0	14	17	17	0	0	0	0	18	12	21	Bacteria	Actinobacteriota	Actinobacteria	Propionibacteriales	Nocardioidaceae	Nocardioides	uncultured_bacterium
61988043677cede7374906969764012f	11	15	12	0	14	11	10	12	22	11	0	0	Bacteria	Planctomycetota	Phycisphaerae	Phycisphaerales	Phycisphaeraceae	SM1A02	uncultured_planctomycete
ee96531a6f46a86c3b4223070ea3a387	0	0	32	0	0	30	21	0	0	0	17	18	Bacteria	Planctomycetota	Planctomycetes	Planctomycetales	Rubinisphaeraceae	SH-PL14	metagenome
857d4b793bc28d488b9c51ef3b1b5d60	0	0	25	0	0	0	28	0	9	0	30	26	Bacteria	Bacteroidota	Bacteroidia	Flavobacteriales	Flavobacteriaceae	Flavobacterium	uncultured_Flavobacteriaceae
228d17a3e53c363762999445c48b3452	0	0	23	0	0	0	18	20	0	25	13	19	Bacteria	Acidobacteriota	Subgroup_5	Subgroup_5	Subgroup_5	Subgroup_5	uncultured_bacterium
276a4a4324af5c0b4efe76346c9a07d7	0	0	20	0	25	20	27	0	0	0	0	26	Bacteria	Actinobacteriota	Actinobacteria	PeM15	PeM15	PeM15	uncultured_bacterium
7731c80e6f3fda886a09a04f4fae1b3a	0	0	0	21	29	0	0	22	26	0	0	20	Bacteria	Proteobacteria	Alphaproteobacteria	Rhizobiales	Beijerinckiaceae	alphaI_cluster	uncultured_bacterium
ec1ae4e1734e0a3a55d8dd83af8e54df	0	0	0	0	28	0	22	0	37	0	0	31	Bacteria	Actinobacteriota	Actinobacteria	Micromonosporales	Micromonosporaceae	unidentified	unidentified
aa0e2655adbf3c9dd4dc670455843e70	10	0	25	11	0	0	16	0	27	15	0	13	Bacteria	Gemmatimonadota	Gemmatimonadetes	Gemmatimonadales	Gemmatimonadaceae	Gemmatimonas	uncultured_bacterium
97e619df97ee1c4b868c5789a3d40516	0	20	0	0	47	14	0	0	0	36	0	0	Bacteria	Proteobacteria	Alphaproteobacteria	Rhizobiales	Rhizobiaceae	Allorhizobium-Neorhizobium-Pararhizobium-Rhizobium	unidentified
c8148cad3f94ca77268d38769538cf23	0	18	15	0	11	0	12	0	13	18	13	17	Bacteria	Actinobacteriota	Actinobacteria	Propionibacteriales	Nocardioidaceae	Nocardioides	unidentified
54d8a4e67a0f8c2fc48c2477fd140555	0	13	0	25	0	0	26	18	0	21	0	14	Bacteria	Actinobacteriota	Acidimicrobiia	Microtrichales	Microtrichaceae	uncultured	uncultured_bacterium
679652c6697eca61bf72cecf67c29f1c	23	0	0	42	25	26	0	0	0	0	0	0	Bacteria	Chloroflexi	KD4-96	KD4-96	KD4-96	KD4-96	uncultured_Chloroflexi
27b2459ffa9b595a0afb2ef06443b3fd	13	0	17	18	12	0	19	0	0	12	8	16	Bacteria	Actinobacteriota	Actinobacteria	Frankiales	Frankiales	Frankiales	uncultured_bacterium
380a1dc9e211c14fe1210320e0580e9f	8	0	18	0	0	0	24	23	12	15	0	15	Bacteria	Actinobacteriota	MB-A2-108	MB-A2-108	MB-A2-108	MB-A2-108	unidentified
f23ca356b29ab44e274b75b4c2b2cd69	0	0	22	9	0	0	22	21	0	0	0	41	Bacteria	Chloroflexi	Anaerolineae	Caldilineales	Caldilineaceae	uncultured	metagenome
cce912ab527a1ce80c3c322f1421c5ae	0	0	2	10	19	0	0	26	34	24	0	0	Bacteria	Actinobacteriota	Actinobacteria	Frankiales	Geodermatophilaceae	unidentified	unidentified
66f1c08d2b8eb8fa2a148e0da0ba43d3	21	13	39	0	0	41	0	0	0	0	0	0	Bacteria	Actinobacteriota	Actinobacteria	Pseudonocardiales	Pseudonocardiaceae	Pseudonocardia	unidentified
6b8a73f0937e48bc5962dd243f99def8	10	9	2	7	10	13	2	20	17	0	13	11	Bacteria	Actinobacteriota	Acidimicrobiia	uncultured	uncultured	uncultured	uncultured_Acidimicrobiia
bc1492d722e5bfb39d095c5518ca35ea	0	0	13	22	11	0	28	0	25	0	0	15	Bacteria	Actinobacteriota	Actinobacteria	Micrococcales	Microbacteriaceae	Microbacterium	unidentified
c71ae37402eb2ee73b56d87ce96dbdc5	24	0	18	17	10	0	17	0	0	0	11	16	Bacteria	Acidobacteriota	Blastocatellia	Blastocatellales	Blastocatellaceae	unidentified	unidentified
8dbfb64484b79fc53734209e392cf4e8	18	0	20	35	0	0	0	0	0	17	23	0	Bacteria	Bacteroidota	Bacteroidia	Chitinophagales	Saprospiraceae	uncultured	uncultured_soil
ef673e25a34d2cb8f6eb01060e43f5d7	9	0	17	18	0	0	29	0	21	19	0	0	Bacteria	Proteobacteria	Alphaproteobacteria	Rhizobiales	Hyphomicrobiaceae	Hyphomicrobium	bacterium_CB03
cdd823b4cd95137e2d1ff1dcd519ed4a	0	0	34	0	0	0	0	23	23	9	24	0	Bacteria	Actinobacteriota	Acidimicrobiia	Microtrichales	Ilumatobacteraceae	uncultured	uncultured_bacterium
467d516503e984b17b131d13fe13254c	0	0	0	0	58	55	0	0	0	0	0	0	Bacteria	Cyanobacteria	Cyanobacteriia	Chloroplast	Chloroplast	Chloroplast	Tetradesmus_obliquus
94aebb9354ba39dc7ecbd3851a809484	0	0	0	0	0	35	0	0	29	0	23	26	Bacteria	Proteobacteria	Alphaproteobacteria	Rhizobiales	Rhizobiaceae	Allorhizobium-Neorhizobium-Pararhizobium-Rhizobium	unidentified
19b2a23895e73e6e97075583ed87b6e5	23	22	0	23	0	0	26	18	0	0	0	0	Bacteria	Actinobacteriota	Actinobacteria	Propionibacteriales	Nocardioidaceae	unidentified	unidentified
b33ecc3a9b7e4746d31ae90fecc263bd	0	11	20	0	19	17	11	0	16	0	11	7	Bacteria	Proteobacteria	Alphaproteobacteria	Rhizobiales	Beijerinckiaceae	Microvirga	Microvirga_subterranea
c63c4e2d4cec5b2413ec6316340798a8	0	0	21	20	12	17	26	0	16	0	0	0	Bacteria	Chloroflexi	KD4-96	KD4-96	KD4-96	KD4-96	uncultured_Chloroflexi
3e90e063135d36439329b6367c9735fe	9	0	0	16	0	25	0	8	14	0	0	39	Bacteria	Proteobacteria	Alphaproteobacteria	Rhizobiales	Rhodomicrobiaceae	Rhodomicrobium	uncultured_bacterium
dfeef1b980bbe1514c8f868a710062a9	0	21	27	22	0	15	0	10	0	16	0	0	Bacteria	Fibrobacterota	Fibrobacteria	Fibrobacterales	Fibrobacteraceae	possible_genus_04	unidentified
bb71e1bcc926eadfa561c62c49b4678a	0	12	31	17	0	0	17	0	18	0	16	0	Bacteria	Bacteroidota	Bacteroidia	Flavobacteriales	Flavobacteriaceae	Flavobacterium	uncultured_Flavobacteriaceae
ddfab285a715f351c8a15eb883978701	0	0	36	0	0	0	37	0	38	0	0	0	Bacteria	Gemmatimonadota	Gemmatimonadetes	Gemmatimonadales	Gemmatimonadaceae	uncultured	unidentified
4c254a3e92faa6c607ea3cac116905c9	0	0	27	0	25	0	14	0	45	0	0	0	Bacteria	Actinobacteriota	Actinobacteria	Pseudonocardiales	Pseudonocardiaceae	Lechevalieria	unidentified
a98961a37a321c5ca224fbe8bd4591b5	0	0	17	0	0	15	0	9	40	12	0	18	Bacteria	Gemmatimonadota	Gemmatimonadetes	Gemmatimonadales	Gemmatimonadaceae	uncultured	unidentified
8f4c67f5d81e855851b58f806b3db0d9	0	34	0	0	0	0	76	0	0	0	0	0	Bacteria	Firmicutes	Clostridia	Clostridiales	Clostridiaceae	Clostridium_sensu_stricto_13	unidentified
cefb12b558dd63a3c8da533acc0cc158	0	0	37	0	0	0	38	0	35	0	0	0	Bacteria	Bacteroidota	Bacteroidia	Cytophagales	Hymenobacteraceae	Adhaeribacter	unidentified
4d5f398719ea022ef16cd7c08dbc2257	0	0	10	10	0	39	6	0	17	0	15	13	Bacteria	Actinobacteriota	Actinobacteria	Frankiales	Geodermatophilaceae	unidentified	unidentified
4646db6af82a247d67db301b72fc00ce	0	0	0	21	20	14	18	0	0	11	17	9	Bacteria	Proteobacteria	Alphaproteobacteria	Rhizobiales	Rhizobiaceae	Mesorhizobium	unidentified
bb6b608a48b1569d3e7a0307f5777c64	0	0	0	0	32	0	18	0	17	24	0	19	Bacteria	Chloroflexi	Chloroflexia	Chloroflexales	Roseiflexaceae	uncultured	uncultured_bacterium
9688aaad1b5579ec591d172c6125cbd1	0	0	0	0	0	31	0	0	57	0	22	0	Bacteria	Actinobacteriota	Actinobacteria	Streptosporangiales	Thermomonosporaceae	Actinocorallia	unidentified
72a82a965dd12d084048c4d1ce80cd6b	9	0	10	6	0	13	18	10	0	21	0	22	Bacteria	Planctomycetota	Phycisphaerae	Tepidisphaerales	WD2101_soil_group	WD2101_soil_group	uncultured_bacterium
9eeccdd7d7108c7b9930e7abe2be37ac	0	20	35	0	0	0	0	0	11	0	43	0	Bacteria	Proteobacteria	Alphaproteobacteria	Rhodobacterales	Rhodobacteraceae	Tabrizicola	unidentified
dbdb199393f8389e79adb8f3883bf76c	0	0	0	0	0	0	34	0	29	0	19	27	Bacteria	Chloroflexi	KD4-96	KD4-96	KD4-96	KD4-96	uncultured_Chloroflexi
118d4afc7e47a8f5ea7f764a3007aee6	0	32	39	0	0	0	0	0	0	37	0	0	Bacteria	Proteobacteria	Gammaproteobacteria	Burkholderiales	Comamonadaceae	Polaromonas	unidentified
479226e680e0c46c848a6ae2b959cf9f	16	0	13	8	0	0	19	17	11	11	12	0	Bacteria	Gemmatimonadota	Gemmatimonadetes	Gemmatimonadales	Gemmatimonadaceae	Gemmatimonas	unidentified
8f10fdbf7758e8636d0371d090f8cc46	9	13	12	8	14	16	6	9	12	8	0	0	Bacteria	Actinobacteriota	Actinobacteria	Frankiales	uncultured	uncultured	unidentified
b194c78c044bc321855413ac88c174d3	0	5	0	1	22	7	0	14	33	0	14	11	Bacteria	Actinobacteriota	Actinobacteria	Micrococcales	Intrasporangiaceae	Terrabacter	unidentified
7e8728812ae47a25744c9ac73ae25665	0	0	0	24	30	0	0	28	0	0	25	0	Bacteria	Proteobacteria	Alphaproteobacteria	Rhizobiales	KF-JG30-B3	KF-JG30-B3	unidentified
88d58e5f60f041a183b8791ee076f798	0	0	0	0	23	0	0	84	0	0	0	0	Bacteria	Acidobacteriota	Holophagae	Subgroup_7	Subgroup_7	Subgroup_7	uncultured_soil
1c22202e197e525465f3c89bb0946f60	13	13	0	0	0	18	23	0	32	0	0	7	Bacteria	Actinobacteriota	Acidimicrobiia	unidentified	unidentified	unidentified	unidentified
4a1cd945dc04b0b2b395ab5477bc5b1f	0	8	12	9	14	16	26	0	0	0	6	15	Bacteria	Chloroflexi	Dehalococcoidia	S085	S085	S085	uncultured_bacterium
3270aa1be230b8315fef376d64cfd801	0	0	0	0	25	0	0	0	36	20	25	0	Bacteria	Proteobacteria	Alphaproteobacteria	Rhizobiales	Hyphomicrobiaceae	Hyphomicrobium	unidentified
92e5bec88ed737e0af79cef562fc0092	0	0	0	0	16	42	19	0	28	0	0	0	Bacteria	Proteobacteria	Alphaproteobacteria	Azospirillales	Azospirillaceae	Skermanella	unidentified
1e324175c814908d439f47a2a6d8fe74	0	8	16	0	11	0	0	0	38	19	0	12	Bacteria	Proteobacteria	Alphaproteobacteria	Sphingomonadales	Sphingomonadaceae	Sphingobium	unidentified
678850478830117d5bd0f99d7b988f84	22	20	0	0	8	0	0	11	14	17	11	0	Bacteria	Proteobacteria	Alphaproteobacteria	Rhizobiales	Xanthobacteraceae	uncultured	unidentified
5bccaa8caba5ade90a96fb9d28a48014	13	6	25	13	11	0	20	15	0	0	0	0	Bacteria	Planctomycetota	Planctomycetes	Gemmatales	Gemmataceae	Gemmata	uncultured_bacterium
8fdbd4e4f629a8d32d09e7d8e119673d	0	8	8	0	23	6	15	0	0	24	10	9	Bacteria	Bacteroidota	Bacteroidia	Cytophagales	Hymenobacteraceae	Adhaeribacter	uncultured_bacterium
896f0588fd034a224d374b82353e6bb2	0	0	0	0	0	0	19	44	0	15	0	25	Bacteria	Actinobacteriota	Acidimicrobiia	IMCC26256	IMCC26256	IMCC26256	uncultured_Acidimicrobiia
acde9355b5d932c8b013c330e11cf468	21	0	15	0	5	18	0	8	0	18	17	0	Bacteria	Cyanobacteria	Cyanobacteriia	Chloroplast	Chloroplast	Chloroplast	Bacillaria_paxillifer
668437cb93b12f8d49a4bbae5fbc0cc8	13	0	0	17	13	0	20	17	10	0	0	12	Bacteria	Actinobacteriota	Acidimicrobiia	Microtrichales	Ilumatobacteraceae	unidentified	unidentified
dc53e80a459fcd380e3914deee9c6a80	12	16	11	9	10	8	10	11	15	0	0	0	Bacteria	Proteobacteria	Alphaproteobacteria	Sphingomonadales	Sphingomonadaceae	unidentified	unidentified
ba21e58c1be9f1561caf9c0416ae7cba	11	17	0	9	11	12	14	6	12	0	10	0	Bacteria	Proteobacteria	Alphaproteobacteria	Rhodobacterales	Rhodobacteraceae	Amaricoccus	uncultured_bacterium
27de6d92ca5be5fcbdce0483c29206f3	0	17	21	0	10	0	9	0	17	0	15	13	Bacteria	Gemmatimonadota	Gemmatimonadetes	Gemmatimonadales	Gemmatimonadaceae	uncultured	unidentified
f1b67d9bdbaadf37f4b55e43d939ae3e	0	12	9	2	12	12	15	9	11	9	11	0	Bacteria	Actinobacteriota	Actinobacteria	Corynebacteriales	Mycobacteriaceae	Mycobacterium	unidentified
502213d8faa7a6f464dd22d8c681d583	0	0	34	0	29	0	0	0	0	13	26	0	Bacteria	Actinobacteriota	Acidimicrobiia	Microtrichales	Ilumatobacteraceae	uncultured	uncultured_Acidimicrobiaceae
bd6952fbbb87218cb4a0e1bdad849b40	0	0	6	10	13	6	10	8	10	14	12	13	Bacteria	Gemmatimonadota	Gemmatimonadetes	Gemmatimonadales	Gemmatimonadaceae	Gemmatimonas	uncultured_soil
ecea4f53fb02f978f9125254ca6fc13c	0	0	0	56	0	0	0	0	0	46	0	0	Bacteria	Actinobacteriota	Actinobacteria	Frankiales	Geodermatophilaceae	unidentified	unidentified
7247d87f40a73cb31d2780ae47767d48	11	8	0	0	12	7	0	16	0	11	8	28	Bacteria	Gemmatimonadota	Gemmatimonadetes	Gemmatimonadales	Gemmatimonadaceae	uncultured	unidentified
c1c0c28b1c2b985096fb6e4b3ded8bfc	0	13	11	10	12	0	9	17	10	9	10	0	Bacteria	Gemmatimonadota	Gemmatimonadetes	Gemmatimonadales	Gemmatimonadaceae	unidentified	unidentified
dd33fe2cb05323f24ce3a5fd33095da1	0	0	26	0	0	0	0	0	10	15	27	23	Bacteria	Abditibacteriota	Abditibacteria	Abditibacteriales	Abditibacteriaceae	Abditibacterium	uncultured_bacterium
759749bfc85273da77f6625a9176853c	0	0	10	23	6	25	0	0	7	0	29	0	Bacteria	Bacteroidota	Bacteroidia	Cytophagales	Hymenobacteraceae	Adhaeribacter	unidentified
43d35a7cedbf4c741456d537ecabe065	25	0	0	18	0	17	0	18	0	0	0	21	Bacteria	Actinobacteriota	Actinobacteria	Micromonosporales	Micromonosporaceae	unidentified	unidentified
4c483d026342c3e52049eeeb9064987a	18	0	23	0	0	26	0	13	19	0	0	0	Bacteria	Bacteroidota	Bacteroidia	Chitinophagales	Saprospiraceae	uncultured	uncultured_Haliscomenobacter
0fe949b16f2e046cf4cc735c4a7de04b	18	0	22	0	0	0	18	0	18	0	0	23	Bacteria	Actinobacteriota	Actinobacteria	Micromonosporales	Micromonosporaceae	unidentified	unidentified
83fc9bbf944e13a2091f926312eaf77c	13	0	11	12	9	13	11	14	16	0	0	0	Bacteria	Proteobacteria	Alphaproteobacteria	Rickettsiales	Mitochondria	Mitochondria	uncultured_bacterium
f06bf66d00dd172ab27acb2b906062e5	12	0	0	14	15	26	18	0	0	14	0	0	Bacteria	Chloroflexi	OLB14	OLB14	OLB14	OLB14	unidentified
b96ce6e10164a038be44853aa248b80f	8	0	17	15	14	0	0	13	9	9	0	14	Bacteria	Actinobacteriota	Acidimicrobiia	Microtrichales	Iamiaceae	Iamia	unidentified
eb279c761c460f8ac3707d8744ad8dd1	0	10	13	7	13	10	29	7	10	0	0	0	Bacteria	Actinobacteriota	Actinobacteria	Propionibacteriales	Propionibacteriaceae	unidentified	unidentified
cedf2b8a454e110e31701f223c321102	0	0	43	0	0	0	24	0	32	0	0	0	Bacteria	Bacteroidota	Bacteroidia	Flavobacteriales	Flavobacteriaceae	Flavobacterium	Flavobacterium_flevense
c0b2a7ae03e61fa701b8a4d195b64fa8	0	0	0	27	0	44	8	0	0	0	0	20	Bacteria	Actinobacteriota	Actinobacteria	Streptomycetales	Streptomycetaceae	Streptomyces	unidentified
b4c49e45ab2cff21e18fe73d58582287	0	0	0	0	32	21	0	0	0	17	0	29	Bacteria	Actinobacteriota	Actinobacteria	Frankiales	Geodermatophilaceae	unidentified	unidentified
efa8b310c44275c19831128b95ce9cb5	25	18	0	25	0	16	0	0	0	14	0	0	Bacteria	Proteobacteria	Alphaproteobacteria	Micropepsales	Micropepsaceae	uncultured	unidentified
7cabfa3976d177f07c8d3782f0a871fb	12	11	0	0	0	0	25	14	11	0	0	25	Bacteria	Proteobacteria	Alphaproteobacteria	Caulobacterales	Caulobacteraceae	Phenylobacterium	unidentified
fce7f0fffbae93ffee620e63838a6403	7	6	6	0	0	0	0	0	0	58	5	16	Bacteria	Actinobacteriota	Actinobacteria	Streptomycetales	Streptomycetaceae	Streptomyces	unidentified
26ac5def5cc1a2f183c8186c8b17b938	0	7	0	0	12	0	17	0	24	11	15	12	Bacteria	Planctomycetota	Planctomycetes	Pirellulales	Pirellulaceae	Pirellula	agricultural_soil
0b857fb110c54c72c21fc92f7813d9df	0	0	9	18	21	0	0	0	23	0	27	0	Bacteria	Proteobacteria	Gammaproteobacteria	Burkholderiales	Comamonadaceae	Pelomonas	unidentified
ee918fcf741d667442eeedfdfe2e0382	0	0	0	33	0	20	0	0	45	0	0	0	Bacteria	Actinobacteriota	Acidimicrobiia	uncultured	uncultured	uncultured	unidentified
7ce62f310692717b0ff9b688abecf1b8	0	0	0	13	0	0	0	0	0	35	22	28	Bacteria	Proteobacteria	Alphaproteobacteria	Rhizobiales	Xanthobacteraceae	unidentified	unidentified
e5038eeda996ce92160db67fc9bbc3aa	42	0	0	0	0	0	0	0	12	0	0	43	Bacteria	Actinobacteriota	Actinobacteria	Micromonosporales	Micromonosporaceae	Actinoplanes	unidentified
097a28d290f69ab0ef21b51e20dd052e	42	23	0	0	0	0	0	0	0	32	0	0	Bacteria	Proteobacteria	Alphaproteobacteria	Sphingomonadales	Sphingomonadaceae	unidentified	unidentified
8a9e597b6be5487ac1de769c90d75580	18	19	0	17	21	0	0	0	0	22	0	0	Bacteria	Planctomycetota	Planctomycetes	Planctomycetales	Rubinisphaeraceae	SH-PL14	metagenome
24086fc3284111de6e07877a04cea838	13	0	29	0	0	0	0	12	0	8	17	18	Bacteria	Acidobacteriota	Blastocatellia	Blastocatellales	Blastocatellaceae	unidentified	unidentified
6a2badc8f6b416b1b3ad3254179afa9c	8	9	10	12	15	7	0	9	11	16	0	0	Bacteria	Proteobacteria	Alphaproteobacteria	Rhizobiales	Xanthobacteraceae	unidentified	unidentified
14a36d5717f81e9d5638c4cd4320b9f3	0	0	0	0	40	0	33	0	0	24	0	0	Bacteria	Gemmatimonadota	Gemmatimonadetes	Gemmatimonadales	Gemmatimonadaceae	uncultured	unidentified
c362f7b120210410a5419e174dcb14f5	0	0	9	13	0	11	0	0	17	16	18	12	Bacteria	Bacteroidota	Bacteroidia	Cytophagales	Hymenobacteraceae	Hymenobacter	unidentified
9775ad0e5ad97a6fe5350a2679584141	0	0	0	0	19	16	23	0	0	18	0	20	Bacteria	Acidobacteriota	Acidobacteriae	Solibacterales	Solibacteraceae	Candidatus_Solibacter	unidentified
4964cb7de0a993851f3e79062c869613	45	0	0	50	0	0	0	0	0	0	0	0	Bacteria	Actinobacteriota	Actinobacteria	Micromonosporales	Micromonosporaceae	Actinoplanes	unidentified
a363b50a17df809d84532ab62fa4b69e	12	0	0	0	0	14	17	0	19	12	21	0	Bacteria	Actinobacteriota	Acidimicrobiia	unidentified	unidentified	unidentified	unidentified
c9f5b42c37762f9f0b2319723d327ba7	1	5	11	10	15	6	0	9	13	0	6	19	Bacteria	Acidobacteriota	Holophagae	Subgroup_7	Subgroup_7	Subgroup_7	unidentified
de36834a80c922ac1321efb90f32ab0b	0	22	0	0	0	0	0	0	44	0	29	0	Bacteria	Actinobacteriota	Acidimicrobiia	Actinomarinales	uncultured	uncultured	uncultured_soil
ac2dd556f694f9c332f13a7f867bb1d1	0	0	26	20	0	0	18	0	0	0	16	15	Bacteria	Proteobacteria	Alphaproteobacteria	Sphingomonadales	Sphingomonadaceae	unidentified	unidentified
41430c38fd4e5bc34d05d19c47d4559f	17	0	23	0	0	12	16	10	0	0	0	16	Bacteria	Proteobacteria	Alphaproteobacteria	Rhodobacterales	Rhodobacteraceae	Amaricoccus	uncultured_bacterium
36fe1b3fc973150b9458ad9908bf42af	14	0	13	0	0	17	0	0	25	0	13	12	Bacteria	Chloroflexi	TK10	TK10	TK10	TK10	unidentified
0f4392a87ba8d2f20d616efa9ec4fddb	2	21	0	22	4	19	2	1	23	0	0	0	Bacteria	Proteobacteria	Alphaproteobacteria	Rhodobacterales	Rhodobacteraceae	Amaricoccus	unidentified
0059cbfa7e624b670d68eaedd60f8b2c	0	17	29	27	0	0	0	0	21	0	0	0	Bacteria	Actinobacteriota	MB-A2-108	MB-A2-108	MB-A2-108	MB-A2-108	uncultured_soil
1ba9a3d30155d300f9716d08c77f0811	0	16	28	0	0	0	14	0	17	0	0	19	Bacteria	Proteobacteria	Alphaproteobacteria	Sphingomonadales	Sphingomonadaceae	Sphingomonas	unidentified
978bf82fd0c90f9836333a8758e52985	0	14	0	15	19	13	33	0	0	0	0	0	Bacteria	Proteobacteria	Alphaproteobacteria	Sphingomonadales	Sphingomonadaceae	Altererythrobacter	unidentified
3810f73af41cf8eb820733375129058b	0	0	0	24	6	21	24	19	0	0	0	0	Bacteria	Chloroflexi	Gitt-GS-136	Gitt-GS-136	Gitt-GS-136	Gitt-GS-136	uncultured_bacterium
2aeacf98cc1ac06cd008f3eec2f33748	0	0	14	21	10	0	0	0	19	18	11	0	Bacteria	Actinobacteriota	Actinobacteria	Propionibacteriales	Nocardioidaceae	Nocardioides	unidentified
9e72682bb60f95bd739ffaba24d233f5	0	0	0	28	0	0	32	0	33	0	0	0	Bacteria	Chloroflexi	KD4-96	KD4-96	KD4-96	KD4-96	uncultured_bacterium
bd3cbd0a74f0c9806a2e17d7be159e58	0	0	0	0	12	6	16	12	18	0	14	15	Bacteria	Proteobacteria	Alphaproteobacteria	Rhizobiales	Beijerinckiaceae	Microvirga	uncultured_bacterium
59557b0d7e7f7a22b71b0d922490b076	34	0	11	0	9	30	8	0	0	0	0	0	Bacteria	Gemmatimonadota	Gemmatimonadetes	Gemmatimonadales	Gemmatimonadaceae	uncultured	unidentified
09907e65d23026b24610600a3996e775	15	0	0	14	0	16	0	0	26	0	0	21	Bacteria	Proteobacteria	Alphaproteobacteria	Rhizobiales	Hyphomicrobiaceae	Pedomicrobium	unidentified
ac25eb08929d6c9f56218c160caeba7a	9	4	6	1	8	0	16	11	1	6	24	6	Bacteria	Actinobacteriota	Actinobacteria	Pseudonocardiales	Pseudonocardiaceae	Pseudonocardia	unidentified
7b21965bab7bb894233175082e167a1e	0	0	34	0	47	0	0	0	0	0	11	0	Bacteria	Bacteroidota	Bacteroidia	Flavobacteriales	Flavobacteriaceae	Flavobacterium	unidentified
250570725c0b575ac7bc254e6c20fd38	0	0	28	0	28	0	23	0	0	0	0	13	Bacteria	Bacteroidota	Bacteroidia	Cytophagales	Hymenobacteraceae	Adhaeribacter	Adhaeribacter_terrae
ff0dfa447315da33791fd97cc17ca78d	0	0	10	0	23	10	0	16	11	22	0	0	Bacteria	Bacteroidota	Bacteroidia	Cytophagales	Hymenobacteraceae	Adhaeribacter	unidentified
4ef357cf181bd76239c035e29fa27cea	0	0	0	0	20	0	22	17	0	0	0	33	Bacteria	Proteobacteria	Alphaproteobacteria	unidentified	unidentified	unidentified	unidentified
472baa7a5065986ba094f90cd7d5e7d7	22	0	0	22	0	0	0	0	0	17	30	0	Bacteria	Actinobacteriota	Actinobacteria	Propionibacteriales	Nocardioidaceae	Nocardioides	unidentified
e1d5cfe1a419446d827fcfc50ed9d25e	18	0	0	16	21	20	0	0	0	0	16	0	Bacteria	Proteobacteria	Alphaproteobacteria	Sphingomonadales	Sphingomonadaceae	Sphingomonas	unidentified
c09bd2560a670aadd7a927e4662e7f47	15	10	23	0	0	0	18	0	0	0	15	10	Bacteria	Bacteroidota	Bacteroidia	Flavobacteriales	Flavobacteriaceae	Flavobacterium	unidentified
835108307640ec61814974cb20312bd9	11	0	10	0	0	0	9	5	30	6	11	9	Bacteria	Bacteroidota	Kapabacteria	Kapabacteriales	Kapabacteriales	Kapabacteriales	uncultured_Chlorobiales
d2f4ff0f3132ad8ec4d26319202d09b0	8	6	0	0	11	8	0	9	14	11	9	15	Bacteria	Actinobacteriota	Actinobacteria	Frankiales	Nakamurellaceae	Nakamurella	unidentified
f6ecc369e377aae179e331977da26c28	7	6	10	5	0	0	14	17	11	10	0	11	Bacteria	Planctomycetota	Phycisphaerae	Phycisphaerales	Phycisphaeraceae	SM1A02	unidentified
fb0fc031b2e6819dd89b04a43cbe6d76	0	43	0	0	0	0	0	0	0	48	0	0	Bacteria	Actinobacteriota	Actinobacteria	Streptomycetales	Streptomycetaceae	Streptomyces	unidentified
91b4d625d6af1fc0bd4882cde05f1fca	0	37	34	0	10	10	0	0	0	0	0	0	Bacteria	Acidobacteriota	Holophagae	Subgroup_7	Subgroup_7	Subgroup_7	unidentified
afbe1678675c511d28777b3a42b90d97	0	0	20	24	0	25	0	0	0	0	0	22	Bacteria	Chloroflexi	KD4-96	KD4-96	KD4-96	KD4-96	uncultured_bacterium
4bd97691ebb5bca80219ab66fd2007ba	0	0	0	53	0	0	0	0	0	0	38	0	Bacteria	Patescibacteria	Saccharimonadia	Saccharimonadales	Saccharimonadaceae	TM7a	uncultured_bacterium
6af577f461b847f9d2097a1f9662e986	21	0	0	0	0	46	0	0	0	23	0	0	Bacteria	Patescibacteria	Saccharimonadia	Saccharimonadales	Saccharimonadaceae	TM7a	uncultured_bacterium
0b8e85817a7a6888cc1711979ece3657	0	0	13	0	0	18	0	13	13	19	0	14	Bacteria	Proteobacteria	Alphaproteobacteria	Rhizobiales	Rhizobiaceae	Allorhizobium-Neorhizobium-Pararhizobium-Rhizobium	unidentified
20cd3fd0f39664826441756b51262dd5	0	0	0	22	17	22	17	0	12	0	0	0	Bacteria	Chloroflexi	KD4-96	KD4-96	KD4-96	KD4-96	uncultured_Chloroflexi
2532efd1dd41173b5521674d0db223b7	23	19	20	0	0	0	0	0	0	0	27	0	Bacteria	Chloroflexi	TK10	TK10	TK10	TK10	unidentified
82fe8b2ac6114bdfc64fa845c18c5eee	2	13	3	0	14	0	0	18	0	20	0	19	Bacteria	Actinobacteriota	Actinobacteria	Micrococcales	Cellulomonadaceae	Cellulomonas	unidentified
bcc5fa816388060e5de020dec3cafa2d	0	27	0	23	0	0	0	0	0	0	18	21	Bacteria	Bacteroidota	Kapabacteria	Kapabacteriales	Kapabacteriales	Kapabacteriales	uncultured_Chlorobiales
8371fa7331b0808d588b0a99624487c0	0	0	31	0	0	0	22	0	36	0	0	0	Bacteria	Gemmatimonadota	Gemmatimonadetes	Gemmatimonadales	Gemmatimonadaceae	uncultured	unidentified
b465e53c8f4d2ff73faf9c16beb016b1	0	0	21	13	12	0	0	17	13	0	0	13	Bacteria	Actinobacteriota	Actinobacteria	Micrococcales	Microbacteriaceae	Microbacterium	unidentified
40be37e469c10a93fe6c65051cba81df	0	0	0	0	0	36	0	0	0	0	53	0	Bacteria	Actinobacteriota	Actinobacteria	Kineosporiales	Kineosporiaceae	Kineosporia	uncultured_bacterium
b7a54bf39bf80706913fda4d35a39bc7	32	0	3	0	1	20	0	0	16	0	16	0	Bacteria	Actinobacteriota	Actinobacteria	Micrococcales	Microbacteriaceae	Leifsonia	unidentified
8128df91a33e0fdf6e6a63cab2f62978	17	0	26	0	0	0	15	0	10	0	0	20	Bacteria	Actinobacteriota	Actinobacteria	Micrococcales	Microbacteriaceae	Microbacterium	unidentified
95274cdec5fc4cde9df37b508532a73e	17	0	0	0	22	0	15	0	19	0	0	15	Bacteria	Proteobacteria	Alphaproteobacteria	Sphingomonadales	Sphingomonadaceae	Novosphingobium	unidentified
9e58b1e5eeb2f7f15f6a84dcc523a754	12	12	2	10	10	12	6	0	0	19	5	0	Bacteria	Bacteroidota	Bacteroidia	Cytophagales	Hymenobacteraceae	Hymenobacter	unidentified
bfdafd8f265ea87e6b6135e53982afa3	0	0	36	0	0	0	0	0	0	0	0	52	Bacteria	Actinobacteriota	Actinobacteria	Frankiales	uncultured	uncultured	metagenome
85a6a492f89b34546c8b6016df49d1a5	0	0	19	0	25	11	0	0	0	14	0	19	Bacteria	Bacteroidota	Bacteroidia	Chitinophagales	Saprospiraceae	uncultured	unidentified
4151b5db90995ebfb944aeb7a2f4b499	0	0	0	34	0	0	40	0	0	0	0	14	Bacteria	Chloroflexi	KD4-96	KD4-96	KD4-96	KD4-96	uncultured_bacterium
bd0e60a2388df0eb381184f1f15e4e19	0	0	0	0	46	0	0	0	42	0	0	0	Bacteria	Cyanobacteria	Cyanobacteriia	Chloroplast	Chloroplast	Chloroplast	Bacillaria_paxillifer
983b715cc45f8a214cc52b0f03150553	15	0	8	17	11	0	5	6	13	0	6	6	Bacteria	Actinobacteriota	Actinobacteria	Micromonosporales	Micromonosporaceae	Actinoplanes	unidentified
8ee84306ba4f473b700ec53b04f21249	9	0	12	0	9	0	0	11	20	14	0	12	Bacteria	Proteobacteria	Alphaproteobacteria	Rhizobiales	Rhizobiaceae	Allorhizobium-Neorhizobium-Pararhizobium-Rhizobium	unidentified
1e48310a19bfc36169c709125fdce7e7	0	24	20	0	24	0	0	0	0	0	0	19	Bacteria	Proteobacteria	Alphaproteobacteria	Rhizobiales	Xanthobacteraceae	uncultured	unidentified
a4116ed6462ac8efcc95452420aae198	0	11	0	13	11	0	5	11	19	0	7	10	Bacteria	Actinobacteriota	Actinobacteria	Frankiales	unidentified	unidentified	unidentified
667474dcd1554384d29a643e368f9437	0	0	15	0	18	17	18	0	0	19	0	0	Bacteria	Actinobacteriota	Acidimicrobiia	Actinomarinales	uncultured	uncultured	unidentified
3ed4667f11db3272694bf5577db909cb	0	0	11	12	14	16	11	9	14	0	0	0	Bacteria	Cyanobacteria	Cyanobacteriia	Cyanobacteriales	Nostocaceae	Nostoc_PCC-73102	unidentified
7c1899f91f4d2f30a37504aa4285eaaa	0	0	0	0	33	0	29	0	0	0	0	25	Bacteria	Gemmatimonadota	Gemmatimonadetes	Gemmatimonadales	Gemmatimonadaceae	uncultured	metagenome
aa0eae3f93fb6d2d0a5e472e1d26c509	0	0	0	0	26	0	0	17	0	0	0	44	Bacteria	Actinobacteriota	Acidimicrobiia	Microtrichales	Ilumatobacteraceae	Ilumatobacter	unidentified
563fbba6a9332f6ec3a8ed451a4ee69c	20	5	0	0	0	0	0	17	16	10	0	18	Bacteria	Proteobacteria	Gammaproteobacteria	Burkholderiales	Comamonadaceae	Polaromonas	unidentified
e99e60044e4dadb9a90bc512b713756b	18	0	18	16	0	0	0	0	20	0	0	14	Bacteria	Gemmatimonadota	Gemmatimonadetes	Gemmatimonadales	Gemmatimonadaceae	unidentified	unidentified
700e7a0d495022347ef7cb14dd856175	14	0	17	0	0	0	37	0	18	0	0	0	Bacteria	Planctomycetota	Planctomycetes	Pirellulales	Pirellulaceae	Pirellula	uncultured_soil
e2db071a8d601106e1cd85e4badf45ab	0	27	0	0	0	0	0	0	0	59	0	0	Bacteria	Actinobacteriota	Actinobacteria	Kineosporiales	Kineosporiaceae	Kineosporia	uncultured_bacterium
d47067ca0ab7118e4a1c2d9286f965cf	0	0	36	16	0	34	0	0	0	0	0	0	Bacteria	Proteobacteria	Alphaproteobacteria	Rhizobiales	Beijerinckiaceae	Bosea	unidentified
ec08e5ee648706138ce5124f9410fee4	0	0	0	0	0	21	0	65	0	0	0	0	Bacteria	Actinobacteriota	Actinobacteria	Propionibacteriales	Nocardioidaceae	Nocardioides	Nocardioides_terrigena
9042ea00a7f02c891599ae986999ab3d	18	0	0	12	0	0	12	10	21	0	0	12	Bacteria	Acidobacteriota	Subgroup_5	Subgroup_5	Subgroup_5	Subgroup_5	uncultured_bacterium
cc7d2620ded09a413ecfe54c0f8271ec	17	0	23	20	0	0	9	0	0	16	0	0	Bacteria	Proteobacteria	Alphaproteobacteria	Reyranellales	Reyranellaceae	Reyranella	unidentified
5924d1b4f4db84fb5405c92232d09ab4	5	15	15	0	7	4	1	3	3	6	18	8	Bacteria	Gemmatimonadota	Gemmatimonadetes	Gemmatimonadales	Gemmatimonadaceae	uncultured	uncultured_Gemmatimonadetes
97e6a239ddf034bb1628fd0c730fb456	0	0	16	0	19	0	30	0	0	0	0	20	Bacteria	Bacteroidota	Bacteroidia	Cytophagales	Hymenobacteraceae	Adhaeribacter	Adhaeribacter_terrae
090a337a407948a5b11872da63c93d6d	0	0	1	0	0	23	2	19	22	0	18	0	Bacteria	Chloroflexi	Anaerolineae	SBR1031	A4b	A4b	uncultured_soil
ffa6f5dd1295dc1b0b185aab3cc39324	16	0	21	0	11	0	14	0	0	12	10	0	Bacteria	Firmicutes	Clostridia	Clostridiales	Clostridiaceae	Clostridium_sensu_stricto_1	Clostridium_vincentii
70883c2315bb6eca64b1a58677a5abe3	14	0	6	6	9	10	8	0	4	7	9	11	Bacteria	Proteobacteria	Alphaproteobacteria	Sphingomonadales	Sphingomonadaceae	Sphingomonas	unidentified
cd3f2326e07c5aec7be9d3f48f03977c	0	16	0	0	0	0	16	0	31	21	0	0	Bacteria	Acidobacteriota	Subgroup_5	Subgroup_5	Subgroup_5	Subgroup_5	uncultured_bacterium
988a304fb030cd75a527d943033ca33c	0	0	43	0	0	0	0	0	41	0	0	0	Bacteria	Actinobacteriota	Actinobacteria	Propionibacteriales	Nocardioidaceae	Nocardioides	unidentified
612249e3d24ed371590060ed5d75496b	0	0	0	41	43	0	0	0	0	0	0	0	Bacteria	Proteobacteria	Alphaproteobacteria	Azospirillales	Azospirillaceae	Skermanella	unidentified
425e75ba5715973eef4c9a594c50a637	0	0	0	0	31	0	0	0	53	0	0	0	Bacteria	Proteobacteria	Alphaproteobacteria	Sphingomonadales	Sphingomonadaceae	Altererythrobacter	unidentified
2e8741066516c5c1d2bc63294ad14c74	0	0	0	0	20	0	35	0	29	0	0	0	Bacteria	Actinobacteriota	Actinobacteria	Pseudonocardiales	Pseudonocardiaceae	Pseudonocardia	uncultured_bacterium
0bb9e02cda83b4331ec7b3e8a27746c0	41	0	0	0	0	0	0	0	0	0	0	42	Bacteria	Actinobacteriota	Actinobacteria	Micromonosporales	Micromonosporaceae	Dactylosporangium	unidentified
7e5f970c07a6f753a9c581569cc236b5	0	27	0	0	30	0	26	0	0	0	0	0	Bacteria	Chloroflexi	Chloroflexia	Chloroflexales	Roseiflexaceae	uncultured	uncultured_bacterium
f7c21d748f3001c05b211d55b2157a59	0	15	0	10	10	11	14	0	0	11	0	12	Bacteria	Chloroflexi	KD4-96	KD4-96	KD4-96	KD4-96	uncultured_Chloroflexi
9516946ba07a7cd82d8d307fa1be352b	0	10	0	0	19	14	13	0	0	0	27	0	Bacteria	Acidobacteriota	Blastocatellia	Blastocatellales	Blastocatellaceae	uncultured	unidentified
b674b8f6f2b5df4368cae3f0bede7c53	0	0	0	0	39	0	0	0	0	0	8	36	Bacteria	Actinobacteriota	Actinobacteria	Streptomycetales	Streptomycetaceae	Streptomyces	unidentified
1c58976eba6aff9c9b027fe1417f50f1	0	0	0	0	0	0	23	34	0	26	0	0	Bacteria	Proteobacteria	Alphaproteobacteria	Rhizobiales	Devosiaceae	unidentified	unidentified
6533cbb48e36f2a80ed32ccefb8391a7	30	0	0	0	0	0	0	26	26	0	0	0	Bacteria	Actinobacteriota	Actinobacteria	Propionibacteriales	Nocardioidaceae	Nocardioides	unidentified
82bb6b280e6fdd15d066acc74d9fa123	13	7	0	13	9	15	2	0	9	13	0	1	Bacteria	Gemmatimonadota	Gemmatimonadetes	Gemmatimonadales	Gemmatimonadaceae	Gemmatimonas	unidentified
6a7cd77256e1c03b4ce27834ca8ef0fd	0	22	0	18	0	15	0	0	0	16	11	0	Bacteria	Actinobacteriota	Actinobacteria	Propionibacteriales	Nocardioidaceae	Nocardioides	unidentified
074d1443b1a678bdff2ed360c9c2265c	0	0	21	18	18	0	16	9	0	0	0	0	Bacteria	Planctomycetota	Phycisphaerae	Tepidisphaerales	WD2101_soil_group	WD2101_soil_group	unidentified
fc7f37fb67abe1bbb4dee1582ba61071	9	0	20	0	9	0	0	0	17	6	0	20	Bacteria	Planctomycetota	Phycisphaerae	Tepidisphaerales	WD2101_soil_group	WD2101_soil_group	unidentified
190eb5429a403686db5af9cb6de5caa5	7	0	0	0	0	11	17	12	19	0	9	6	Bacteria	Actinobacteriota	Actinobacteria	0319-7L14	0319-7L14	0319-7L14	uncultured_bacterium
9eaa2e41c31aeecdd5989f2f7cea6b73	0	24	26	0	0	0	12	0	19	0	0	0	Bacteria	Acidobacteriota	Holophagae	Subgroup_7	Subgroup_7	Subgroup_7	unidentified
769ad3337f8f5277b9559f3a02adb7ea	0	13	0	4	0	3	20	0	5	14	16	6	Bacteria	Actinobacteriota	Actinobacteria	Micrococcales	Intrasporangiaceae	unidentified	unidentified
827ae322df476b6d90495069c5b4cfb3	0	0	17	0	24	0	0	20	20	0	0	0	Bacteria	Acidobacteriota	Subgroup_5	Subgroup_5	Subgroup_5	Subgroup_5	uncultured_bacterium
4671dc27004824f2d58ae2f48312b875	0	0	0	19	26	19	0	0	0	0	17	0	Bacteria	Gemmatimonadota	Gemmatimonadetes	Gemmatimonadales	Gemmatimonadaceae	uncultured	unidentified
fc7058c2e0b807af3d9ac07bffc5ba6f	0	0	0	17	12	7	10	0	0	12	8	15	Bacteria	Proteobacteria	Alphaproteobacteria	Rhizobiales	Rhizobiaceae	unidentified	unidentified
345198a0355e24fa1d68997d3964274c	0	0	0	0	39	0	0	0	0	0	0	42	Bacteria	Proteobacteria	Alphaproteobacteria	Sphingomonadales	Sphingomonadaceae	unidentified	unidentified
499d29729d44f83c9f60734cb1d08aad	19	0	24	0	0	0	0	13	0	0	24	0	Bacteria	Planctomycetota	Phycisphaerae	Tepidisphaerales	WD2101_soil_group	WD2101_soil_group	uncultured_organism
5503067a4a783555bf871931cb851231	12	0	0	0	28	0	17	0	14	0	0	9	Bacteria	Actinobacteriota	Actinobacteria	Micrococcales	Microbacteriaceae	Microbacterium	unidentified
a4a4cd24b1f4cf8f1360d220e0bcd950	9	10	11	12	15	0	13	0	10	0	0	0	Bacteria	Gemmatimonadota	Gemmatimonadetes	Gemmatimonadales	Gemmatimonadaceae	uncultured	unidentified
1e8d1127df7d862111afccf3f93d8fda	2	14	1	0	14	0	0	11	0	22	0	16	Bacteria	Actinobacteriota	Actinobacteria	Micrococcales	Cellulomonadaceae	Cellulomonas	unidentified
7bc5f8e21bd00bb6e998da0d3ee9c6c5	0	54	0	0	0	13	13	0	0	0	0	0	Bacteria	Actinobacteriota	Actinobacteria	Kineosporiales	Kineosporiaceae	Kineosporia	unidentified
205a90260fd7c53191ca6d1ad37cb69e	0	26	0	0	25	0	0	0	0	0	29	0	Bacteria	Actinobacteriota	Actinobacteria	Frankiales	Sporichthyaceae	uncultured	uncultured_bacterium
078ba2b8a663934d20369b7363fc6036	0	24	0	0	0	0	0	0	0	18	0	38	Bacteria	Proteobacteria	Gammaproteobacteria	Pseudomonadales	Moraxellaceae	uncultured	unidentified
1f4a6e0c4fd641254fb1fb7ab0c400e3	0	20	60	0	0	0	0	0	0	0	0	0	Bacteria	Proteobacteria	Alphaproteobacteria	Caulobacterales	Caulobacteraceae	unidentified	unidentified
d9c2eacafd216f2d1cad9cc69c192fd7	0	14	19	9	0	14	0	18	6	0	0	0	Bacteria	Chloroflexi	Anaerolineae	Caldilineales	Caldilineaceae	uncultured	metagenome
f74129cf2df200420f263b996f97c3c3	0	0	33	0	0	23	0	0	24	0	0	0	Bacteria	Proteobacteria	Alphaproteobacteria	Rhizobiales	Devosiaceae	Devosia	unidentified
553c97a815094c4e90bf9c8e1720bccf	0	0	23	0	14	0	0	11	15	0	0	17	Bacteria	Acidobacteriota	Subgroup_11	Subgroup_11	Subgroup_11	Subgroup_11	uncultured_bacterium
3583197b949ab28b9c0f8e7bf4235a4d	0	0	0	24	19	0	37	0	0	0	0	0	Bacteria	Proteobacteria	Alphaproteobacteria	Rhizobiales	Rhizobiaceae	Allorhizobium-Neorhizobium-Pararhizobium-Rhizobium	unidentified
f769f9e71a45027022925cbab8426448	8	12	10	6	11	0	10	0	0	10	0	12	Bacteria	Proteobacteria	Alphaproteobacteria	Acetobacterales	Acetobacteraceae	uncultured	uncultured_Paracraurococcus
9997bc55c9a836a8124035c301cec9d6	8	0	5	6	10	10	14	0	11	0	3	12	Bacteria	Gemmatimonadota	Gemmatimonadetes	Gemmatimonadales	Gemmatimonadaceae	Gemmatimonas	Gemmatimonadaceae_bacterium
0decb10344822a05e6890a269d8b7359	0	10	14	16	0	14	3	0	10	0	0	12	Bacteria	Actinobacteriota	Actinobacteria	Propionibacteriales	Nocardioidaceae	Nocardioides	unidentified
7a96a62d7eb800fa629f138ac65de16b	0	0	20	21	0	0	0	0	0	15	0	23	Bacteria	Actinobacteriota	Actinobacteria	Propionibacteriales	Propionibacteriaceae	Micropruina	unidentified
259d7965b48c6fefcc70eea444cd1f53	0	0	18	14	24	0	0	0	23	0	0	0	Bacteria	Bacteroidota	Bacteroidia	Cytophagales	Hymenobacteraceae	Adhaeribacter	Adhaeribacter_terrae
1a217489efe1ac15e1a5f75c640677f9	0	0	16	11	0	11	13	0	0	0	17	11	Bacteria	Actinobacteriota	Actinobacteria	Propionibacteriales	Nocardioidaceae	Marmoricola	unidentified
f02a5e843ce8efed631efe77e0b51947	0	0	0	0	11	12	15	0	20	14	7	0	Bacteria	Chloroflexi	Chloroflexia	Thermomicrobiales	JG30-KF-CM45	JG30-KF-CM45	unidentified
b19d67cca306ae3a5f007c309dab1691	21	0	0	34	23	0	0	0	0	0	0	0	Bacteria	Proteobacteria	Alphaproteobacteria	Rhizobiales	Xanthobacteraceae	Rhodoplanes	uncultured_bacterium
f9e76a16655c26801123301de5b50417	0	0	38	0	0	40	0	0	0	0	0	0	Bacteria	Actinobacteriota	Acidimicrobiia	Microtrichales	Iamiaceae	Iamia	unidentified
65610103f44de251eef7ab8a52a922b4	0	0	0	33	14	0	31	0	0	0	0	0	Bacteria	Proteobacteria	Alphaproteobacteria	Rhizobiales	Xanthobacteraceae	uncultured	unidentified
ddc2107c977986070170af8f7a9ea09a	14	0	0	0	23	0	21	0	19	0	0	0	Bacteria	Proteobacteria	Alphaproteobacteria	Rhizobiales	Beijerinckiaceae	Bosea	Afipia_sp.
d3560a00aae5ade25f7cb8ef0079f672	14	0	0	0	0	21	21	0	19	0	0	2	Bacteria	Acidobacteriota	Blastocatellia	Blastocatellales	Blastocatellaceae	JGI_0001001-H03	unidentified
7e586e770f71e87cce5559b5e5902a51	13	9	10	0	12	8	0	0	11	5	9	0	Bacteria	Bacteroidota	Kapabacteria	Kapabacteriales	Kapabacteriales	Kapabacteriales	uncultured_soil
dea63a54ad5884d17f320ad7ba0fc12c	12	0	15	0	13	0	13	9	15	0	0	0	Bacteria	Planctomycetota	Phycisphaerae	Tepidisphaerales	WD2101_soil_group	WD2101_soil_group	unidentified
dfb2f499de234af8d8e023701810d41e	8	12	0	7	0	17	10	12	0	0	0	11	Bacteria	Planctomycetota	Phycisphaerae	Tepidisphaerales	WD2101_soil_group	WD2101_soil_group	unidentified
c29463fccebd1ee9bef3214f8f60abea	8	10	10	10	5	14	10	0	0	0	0	10	Bacteria	Proteobacteria	Alphaproteobacteria	Reyranellales	Reyranellaceae	Reyranella	unidentified
cb37e4ce6778eb553a53908d819e57b1	3	0	0	16	4	9	10	9	11	6	5	4	Bacteria	Proteobacteria	Alphaproteobacteria	Azospirillales	uncultured	uncultured	uncultured_bacterium
f729e49ec44274f3aee14b5b3cfdd3a0	0	1	0	0	0	0	0	40	0	0	0	36	Bacteria	Actinobacteriota	Actinobacteria	Kineosporiales	Kineosporiaceae	Kineosporia	uncultured_bacterium
6b3f459640960667946e396792eefbcb	0	0	19	0	0	0	0	15	25	0	18	0	Bacteria	Proteobacteria	Alphaproteobacteria	Elsterales	uncultured	uncultured	uncultured_soil
005141dfe8846c93e3a40f6fa254a616	9	0	13	0	0	0	12	10	17	0	0	15	Bacteria	Chloroflexi	KD4-96	KD4-96	KD4-96	KD4-96	uncultured_Chloroflexi
9375c7b07b34bf9106820e7cb3ce1808	0	30	5	27	4	0	0	0	0	0	0	10	Bacteria	Acidobacteriota	Blastocatellia	Blastocatellales	Blastocatellaceae	JGI_0001001-H03	unidentified
87b0be57bba5edcece2c875b8a59b45c	0	0	0	0	0	21	4	0	19	20	7	5	Bacteria	Proteobacteria	Alphaproteobacteria	Sphingomonadales	Sphingomonadaceae	Sphingomonas	unidentified
108bcefa144e8213a2df08fd275c11af	12	0	5	10	17	0	10	0	8	0	0	13	Bacteria	Actinobacteriota	Actinobacteria	Micrococcales	Microbacteriaceae	Microbacterium	unidentified
8d1d3d1a7d005890bfc34cbcccd6f7e8	6	10	6	12	6	2	0	0	10	13	0	10	Bacteria	Actinobacteriota	Actinobacteria	Propionibacteriales	Nocardioidaceae	Nocardioides	unidentified
c51a5da0ae04a9d0a15530e3c7e5dce0	0	22	0	42	2	0	5	0	0	3	0	1	Bacteria	Actinobacteriota	Actinobacteria	Frankiales	unidentified	unidentified	unidentified
ab428bc5cbb794c697bf9d935c4464ac	0	0	14	0	30	11	0	0	0	20	0	0	Bacteria	Chloroflexi	Anaerolineae	SBR1031	A4b	A4b	uncultured_bacterium
07f0380a3668389de61a3d8f802f493a	0	0	6	0	0	36	25	0	0	0	8	0	Bacteria	Proteobacteria	Gammaproteobacteria	Burkholderiales	Comamonadaceae	Polaromonas	uncultured_rape
79b6a55ba628dd093ee3b858fb5ab4e7	0	0	0	0	44	31	0	0	0	0	0	0	Bacteria	Chloroflexi	KD4-96	KD4-96	KD4-96	KD4-96	unidentified
2445aca09521275fca86296563bf62e0	18	0	19	14	0	0	9	0	0	0	0	14	Bacteria	Proteobacteria	Alphaproteobacteria	Sphingomonadales	Sphingomonadaceae	Ellin6055	uncultured_Alphaproteobacteria
b8884bc81a62636ca477d3866fa1e98c	17	0	20	0	0	10	27	0	0	0	0	0	Bacteria	WS2	WS2	WS2	WS2	WS2	uncultured_bacterium
f66187c18307ac5c72aa2d8e5343b658	11	0	0	16	5	10	9	8	3	0	0	12	Bacteria	Actinobacteriota	Actinobacteria	Micrococcales	Microbacteriaceae	Agromyces	Agromyces_terreus
ff27171e1fc3913c1ea1e2893742e287	0	15	17	0	0	16	0	0	0	0	17	9	Bacteria	Gemmatimonadota	Gemmatimonadetes	Gemmatimonadales	Gemmatimonadaceae	unidentified	unidentified
7dc1333fee42920d7d33959ba4a53a78	0	12	17	0	15	0	16	0	0	14	0	0	Bacteria	Actinobacteriota	Acidimicrobiia	uncultured	uncultured	uncultured	unidentified
bc6b01b30e69e79e7e224a25cf449e29	0	12	0	0	0	17	0	0	0	18	11	16	Bacteria	Proteobacteria	Alphaproteobacteria	Rhodobacterales	Rhodobacteraceae	Amaricoccus	uncultured_bacterium
594d09dc654b2aae41b2d480e3755e95	0	12	0	0	17	15	0	0	15	0	0	15	Bacteria	Proteobacteria	Alphaproteobacteria	Rhizobiales	Rhizobiaceae	Phyllobacterium	unidentified
02297a255aa748a02aaf084af34922f9	0	5	13	20	0	0	0	22	0	0	14	0	Bacteria	Armatimonadota	uncultured	uncultured	uncultured	uncultured	uncultured_actinobacterium
fef0838e5cc31c83d9bd0eef4e1867e3	0	0	12	5	13	0	9	23	12	0	0	0	Bacteria	Actinobacteriota	Actinobacteria	Micrococcales	Microbacteriaceae	Microbacterium	unidentified
fd8223a2503afbfa7dcfe30fe20dd5fc	0	0	0	23	0	21	17	0	0	13	0	0	Bacteria	Actinobacteriota	Thermoleophilia	Solirubrobacterales	Solirubrobacteraceae	uncultured	Colobanthus_quitensis
b92d99911d8672b35ca19a44b558cf8a	0	0	0	18	0	0	20	12	24	0	0	0	Bacteria	Actinobacteriota	Actinobacteria	Micrococcales	Intrasporangiaceae	unidentified	unidentified
8740a3b01437c053fe59ce284b521ce7	0	0	0	0	25	0	0	49	0	0	0	0	Bacteria	Actinobacteriota	Actinobacteria	Propionibacteriales	Nocardioidaceae	Marmoricola	unidentified
d6705ff8a048096b0d31f8817407c4db	0	0	0	0	0	0	36	0	0	0	0	38	Bacteria	Cyanobacteria	Cyanobacteriia	Chloroplast	Chloroplast	Chloroplast	Bacillaria_paxillifer
1507705089a8cc7beab14e726489bba6	15	0	0	0	0	14	10	0	18	0	16	0	Bacteria	Acidobacteriota	Holophagae	Subgroup_7	Subgroup_7	Subgroup_7	unidentified
96be2e07b995f224ef281830d467067e	9	7	0	0	10	9	12	5	15	0	0	6	Bacteria	Actinobacteriota	Actinobacteria	Streptomycetales	Streptomycetaceae	Streptomyces	unidentified
c511a438db8f1ac4a6f63a23a3d9945d	0	30	4	19	1	0	6	0	0	3	0	10	Bacteria	Actinobacteriota	Actinobacteria	Micrococcales	Microbacteriaceae	unidentified	unidentified
b8fc60b185d7b59817b8499a191af6d0	0	19	0	0	1	13	2	0	0	19	0	19	Bacteria	Actinobacteriota	Actinobacteria	Frankiales	uncultured	uncultured	unidentified
b12122ca7748c2dc2a66eb8304758c19	0	10	10	0	0	8	8	12	13	0	0	12	Bacteria	Gemmatimonadota	Gemmatimonadetes	Gemmatimonadales	Gemmatimonadaceae	Roseisolibacter	Roseisolibacter_agri
bc89ca5d78ebe66daa22c9017bc37dd1	0	7	22	0	15	0	0	0	0	0	0	29	Bacteria	Actinobacteriota	Thermoleophilia	Solirubrobacterales	Solirubrobacteraceae	uncultured	Colobanthus_quitensis
e548886fc142cec02249be4fd9edd817	0	0	26	0	24	0	0	0	23	0	0	0	Bacteria	Actinobacteriota	Actinobacteria	Micrococcales	Microbacteriaceae	Leifsonia	Microterricola_sp.
53a5966bd24c07896f025f4c6cc9db79	0	0	14	0	0	20	15	0	15	0	0	9	Bacteria	Chloroflexi	Chloroflexia	Chloroflexales	Herpetosiphonaceae	Herpetosiphon	uncultured_bacterium
aa8f46d1a2d907f00a14b8de48e289d8	0	0	0	33	0	0	0	0	0	0	40	0	Bacteria	Planctomycetota	Phycisphaerae	Tepidisphaerales	WD2101_soil_group	WD2101_soil_group	unidentified
f8b346ff86491c6303fbc9de13018785	0	0	0	6	0	16	16	0	12	0	11	12	Bacteria	Planctomycetota	Phycisphaerae	Tepidisphaerales	WD2101_soil_group	WD2101_soil_group	unidentified
c3d12416bf0cabc6659db8efb5fe81b1	0	0	0	0	0	22	0	0	51	0	0	0	Bacteria	Actinobacteriota	Actinobacteria	Kineosporiales	Kineosporiaceae	uncultured	uncultured_bacterium
e2ff6d64a689683b201c6b51a1a8a360	13	0	1	0	2	0	0	26	1	29	0	0	Bacteria	Gemmatimonadota	Gemmatimonadetes	Gemmatimonadales	Gemmatimonadaceae	uncultured	unidentified
1d012a54a04164b10505a96d406cecf2	12	0	0	16	0	16	24	0	2	2	0	0	Bacteria	Chloroflexi	KD4-96	KD4-96	KD4-96	KD4-96	unidentified
ed501123887c10717e6f4a08f70956fb	0	28	15	0	0	0	0	0	17	12	0	0	Bacteria	Armatimonadota	Fimbriimonadia	Fimbriimonadales	Fimbriimonadaceae	Fimbriimonadaceae	uncultured_bacterium
516658a15d046ec7216362b13e82b26d	0	11	0	0	0	0	31	0	14	0	0	16	Bacteria	Proteobacteria	Alphaproteobacteria	Caulobacterales	Caulobacteraceae	Phenylobacterium	unidentified
914e74bd2ba42938972ace154588bce3	0	0	13	0	18	0	0	13	0	19	0	9	Bacteria	Actinobacteriota	Acidimicrobiia	Microtrichales	Iamiaceae	Iamia	metagenome
d8e7d4a7b7d1c63a5a66474696730dd0	0	0	0	18	0	24	20	0	10	0	0	0	Bacteria	Actinobacteriota	Acidimicrobiia	Microtrichales	Ilumatobacteraceae	Ilumatobacter	uncultured_bacterium
4e66f68b1f1c3500c9f8afd4401d59e6	0	0	0	0	0	0	0	28	0	0	44	0	Bacteria	Chloroflexi	KD4-96	KD4-96	KD4-96	KD4-96	uncultured_bacterium
25852603b011f81928b91e768aa36677	0	0	0	0	0	0	0	0	45	0	27	0	Bacteria	Actinobacteriota	Actinobacteria	Pseudonocardiales	Pseudonocardiaceae	Lechevalieria	unidentified
2a0a02b1f78f990fb7561af02babba78	9	0	8	0	0	16	12	0	5	0	9	12	Bacteria	Chloroflexi	Anaerolineae	SBR1031	SBR1031	SBR1031	uncultured_bacterium
3aa594ed616dc95787b249f90a0d9ecf	8	5	6	5	0	8	12	0	14	7	0	6	Bacteria	Chloroflexi	Anaerolineae	Caldilineales	Caldilineaceae	Litorilinea	unidentified
c68d452990d4c41ad69e7c68466b7d3e	7	0	4	6	0	9	0	10	0	10	9	16	Bacteria	Bacteroidota	Kapabacteria	Kapabacteriales	Kapabacteriales	Kapabacteriales	uncultured_bacterium
7e358a88c1787f5f3033b74366f0b7ee	0	13	0	16	14	0	5	11	7	5	0	0	Bacteria	Bacteroidota	Bacteroidia	Flavobacteriales	Flavobacteriaceae	Flavobacterium	unidentified
5e252b0c6e2557fac0eb7f1b602f43e3	0	7	0	9	0	7	11	0	7	9	7	14	Bacteria	Acidobacteriota	Acidobacteriae	Acidobacteriales	uncultured	uncultured	uncultured_Acidobacteriales
45a83ba8490196915a96d2e1ff5ac5fe	0	0	0	0	13	24	17	0	17	0	0	0	Bacteria	Cyanobacteria	Cyanobacteriia	Cyanobacteriales	Nostocaceae	unidentified	unidentified
89ebb1c33d120bd85b3ec6e6262dddba	23	0	25	0	0	0	0	0	0	0	0	22	Bacteria	Actinobacteriota	Actinobacteria	Streptomycetales	Streptomycetaceae	Streptomyces	unidentified
a7d9cbbfd6bf41ac67a09d2772ebbd80	11	0	10	0	0	0	10	13	9	0	10	7	Bacteria	Planctomycetota	Phycisphaerae	Tepidisphaerales	WD2101_soil_group	WD2101_soil_group	unidentified
7020ab2933064c0740634b626ab99181	1	18	0	0	0	17	1	0	2	25	0	6	Bacteria	Actinobacteriota	Actinobacteria	Micrococcales	Microbacteriaceae	Microbacterium	unidentified
94bc89ae2e8594b1a56576cca4180140	0	11	2	11	0	0	14	5	9	0	9	9	Bacteria	Verrucomicrobiota	Verrucomicrobiae	Chthoniobacterales	Xiphinematobacteraceae	Candidatus_Xiphinematobacter	uncultured_bacterium
31867037b5d6c2184dfb6be5c7257e07	0	0	26	0	0	0	28	0	16	0	0	0	Bacteria	Bacteroidota	Bacteroidia	Flavobacteriales	Flavobacteriaceae	Flavobacterium	unidentified
1c4311706449cf56b39e44468e030093	0	0	21	0	15	17	0	0	0	17	0	0	Bacteria	Actinobacteriota	Actinobacteria	Propionibacteriales	Nocardioidaceae	Nocardioides	uncultured_bacterium
973dd422e730510efb97e1479c23aa33	0	0	6	8	0	12	14	0	8	0	7	15	Bacteria	Actinobacteriota	Actinobacteria	Propionibacteriales	Nocardioidaceae	Nocardioides	unidentified
ad2ee44840a6c02dea8e92c6f2939d76	0	0	0	0	0	36	34	0	0	0	0	0	Bacteria	Proteobacteria	Alphaproteobacteria	Rhizobiales	Xanthobacteraceae	Rhodoplanes	uncultured_bacterium
3aa0b388f8277d4b84fce51586768ee4	0	0	0	0	0	0	20	21	0	13	16	0	Bacteria	Chloroflexi	Ktedonobacteria	C0119	C0119	C0119	uncultured_bacterium
e6306715f237397bf763dd81379b9b35	12	0	15	0	0	0	10	0	19	0	0	13	Bacteria	Chloroflexi	TK10	TK10	TK10	TK10	unidentified
8ecc7000484f5efa41720510c75007c3	5	5	8	10	10	5	0	7	5	6	8	0	Bacteria	Actinobacteriota	Actinobacteria	Frankiales	Sporichthyaceae	Longivirga	uncultured_bacterium
4d2cd5127faaa64f2cb16c4d49c2f853	0	24	28	0	0	0	0	0	0	17	0	0	Bacteria	Actinobacteriota	Actinobacteria	Micromonosporales	Micromonosporaceae	unidentified	unidentified
c2eb86c070adcb3896abedd00ae289d0	0	17	26	0	26	0	0	0	0	0	0	0	Bacteria	Proteobacteria	Alphaproteobacteria	Rhizobiales	Rhizobiaceae	Allorhizobium-Neorhizobium-Pararhizobium-Rhizobium	unidentified
ff62b844ca9a062c2099189e79a7ad8d	0	0	0	39	0	0	0	0	0	0	30	0	Bacteria	Gemmatimonadota	Gemmatimonadetes	Gemmatimonadales	Gemmatimonadaceae	uncultured	unidentified
6cb8e02a2be1213fdfa2ceb8e47425d6	21	0	30	0	0	17	0	0	0	0	0	0	Bacteria	Gemmatimonadota	Gemmatimonadetes	Gemmatimonadales	Gemmatimonadaceae	Gemmatimonas	unidentified
9688d15fd6c3ea23f20baa8cc3e2b0ca	18	0	31	0	0	0	0	0	0	0	19	0	Bacteria	Actinobacteriota	Acidimicrobiia	Microtrichales	Ilumatobacteraceae	Ilumatobacter	unidentified
455d35407d226276e61d9a25d25346b5	10	0	11	14	0	0	14	0	0	11	8	0	Bacteria	Proteobacteria	Alphaproteobacteria	Rhizobiales	Rhizobiaceae	Phyllobacterium	unidentified
fc6a7d928446184664d5804169f2ffd0	6	5	0	0	8	15	9	0	11	9	5	0	Bacteria	Armatimonadota	Armatimonadia	Armatimonadales	Armatimonadales	Armatimonadales	uncultured_bacterium
eb4cd7c8589b9c2eb708b27229e8e0d3	0	36	0	0	0	0	0	0	0	32	0	0	Bacteria	Proteobacteria	Alphaproteobacteria	Tistrellales	Geminicoccaceae	Candidatus_Alysiosphaera	metagenome
e94f86d74595e7c4d0dc25796d1666a7	0	22	0	0	0	0	0	25	0	11	10	0	Bacteria	Chloroflexi	TK10	TK10	TK10	TK10	unidentified
f3bea94cbd535f5f58669e893ccd9ef5	0	20	0	0	0	0	35	13	0	0	0	0	Bacteria	Actinobacteriota	Actinobacteria	Micromonosporales	Micromonosporaceae	Dactylosporangium	unidentified
f0c578365026ddf012801726205cf366	0	13	19	0	0	0	0	0	0	17	0	19	Bacteria	Actinobacteriota	Acidimicrobiia	IMCC26256	IMCC26256	IMCC26256	unidentified
a63acb29453e137bae525d89ef589d00	0	12	6	11	0	0	0	7	8	6	11	7	Bacteria	Actinobacteriota	Acidimicrobiia	Microtrichales	Ilumatobacteraceae	CL500-29_marine_group	metagenome
2e6f7b19997c3fbfc19dea59b6907e56	0	0	20	0	0	21	0	0	27	0	0	0	Bacteria	Proteobacteria	Alphaproteobacteria	Rhizobiales	Devosiaceae	Devosia	unidentified
15b9caab01bcf2657757b1dfd41935b8	0	0	11	15	0	7	0	0	8	13	14	0	Bacteria	Actinobacteriota	Actinobacteria	Frankiales	Sporichthyaceae	unidentified	unidentified
0e4e221243368aae65ed03c067b70e13	0	0	0	0	28	0	24	16	0	0	0	0	Bacteria	Actinobacteriota	Actinobacteria	Kineosporiales	Kineosporiaceae	uncultured	uncultured_bacterium
4ce89fa9ea5c6a990c7572a0f93b83f6	18	0	0	0	21	0	19	0	0	0	0	9	Bacteria	Proteobacteria	Alphaproteobacteria	Tistrellales	Geminicoccaceae	Candidatus_Alysiosphaera	unidentified
2f90a5c0251bfa81d06da272d5123f5f	7	6	12	0	0	0	6	17	7	0	5	7	Bacteria	Cyanobacteria	Cyanobacteriia	Chloroplast	Chloroplast	Chloroplast	Chlamydomonas_asymmetrica
adbf0f702b9081ae44127c6ee8070fec	0	22	31	0	0	0	0	0	0	0	14	0	Bacteria	Acidobacteriota	Acidobacteriae	Bryobacterales	Bryobacteraceae	Bryobacter	unidentified
11b922be809778315d2630cce1b90338	0	0	18	0	0	10	16	11	4	0	8	0	Bacteria	Actinobacteriota	Acidimicrobiia	IMCC26256	IMCC26256	IMCC26256	unidentified
b27e223ff6a5321bb3abb3f3e0d9ec45	0	0	13	0	18	13	0	0	0	0	12	11	Bacteria	Planctomycetota	Phycisphaerae	Phycisphaerales	Phycisphaeraceae	SM1A02	unidentified
cad263c4e4832252dd2b8effbd796070	0	0	0	15	0	0	24	15	13	0	0	0	Bacteria	Planctomycetota	Phycisphaerae	Phycisphaerales	Phycisphaeraceae	AKYG587	uncultured_bacterium
8b8af72204ef77a8c512a82a63fff9ec	0	0	0	10	0	23	15	0	9	0	6	4	Bacteria	Planctomycetota	Phycisphaerae	Tepidisphaerales	WD2101_soil_group	WD2101_soil_group	uncultured_bacterium
6fa6173e25b8f52b796da3e708e1513f	0	0	0	0	38	29	0	0	0	0	0	0	Bacteria	Acidobacteriota	Holophagae	Subgroup_7	Subgroup_7	Subgroup_7	uncultured_soil
e975cd7ddb93e3e941cf09450e11ea77	33	0	0	0	0	0	0	0	0	33	0	0	Bacteria	Chloroflexi	Gitt-GS-136	Gitt-GS-136	Gitt-GS-136	Gitt-GS-136	uncultured_Chloroflexus
1ba8dbaa321c2c33669aee74e104b276	0	10	0	0	9	12	0	0	0	24	11	0	Bacteria	Actinobacteriota	Actinobacteria	Corynebacteriales	Mycobacteriaceae	Mycobacterium	unidentified
936a37767130796dbf130494b8c8429b	0	9	0	15	7	14	0	0	0	0	0	21	Bacteria	Actinobacteriota	Actinobacteria	Corynebacteriales	Nocardiaceae	Williamsia	unidentified
0d46306427cd19cbdad5b9a57f35e9f3	0	0	18	0	0	0	0	0	18	0	0	30	Bacteria	Proteobacteria	Alphaproteobacteria	Dongiales	Dongiaceae	Dongia	unidentified
3ce42bb2818b703a910455d53466f1ed	0	0	0	0	20	0	16	0	23	7	0	0	Bacteria	Proteobacteria	Alphaproteobacteria	Acetobacterales	Acetobacteraceae	uncultured	unidentified
b1901a5fa5b4e2fc8c42205879d03ce8	0	18	0	0	0	19	0	0	28	0	0	0	Bacteria	Chloroflexi	Anaerolineae	Caldilineales	Caldilineaceae	uncultured	metagenome
fefcdb1aa9ba348426e4aaadf82f7229	0	9	13	0	14	0	17	0	12	0	0	0	Bacteria	Proteobacteria	Alphaproteobacteria	Rickettsiales	Mitochondria	Mitochondria	unidentified
33977fc0b0446539ddf96c4d76525473	0	0	0	0	0	0	21	44	0	0	0	0	Bacteria	Actinobacteriota	Actinobacteria	Propionibacteriales	Nocardioidaceae	Nocardioides	unidentified
fdf324e0c4b154e463a60b792e2ab548	0	0	0	0	0	0	18	17	13	17	0	0	Bacteria	Actinobacteriota	Actinobacteria	Corynebacteriales	Mycobacteriaceae	Mycobacterium	unidentified
4100037d48eb4ec9ce526446555cd09e	10	0	11	7	0	0	11	0	7	11	7	0	Bacteria	Actinobacteriota	Acidimicrobiia	IMCC26256	IMCC26256	IMCC26256	uncultured_Cellulomonadaceae
020a370376fa003544e066d0ba0ed8e9	8	0	0	8	16	0	9	0	14	0	0	9	Bacteria	Abditibacteriota	Abditibacteria	Abditibacteriales	Abditibacteriaceae	Abditibacterium	uncultured_bacterium
cdd0ad973748315dfaf09b0f2ac76145	6	0	0	0	0	17	11	10	0	6	0	14	Bacteria	Actinobacteriota	Actinobacteria	Propionibacteriales	Nocardioidaceae	Nocardioides	uncultured_bacterium
68ff9f1888cfce3f806988d6134447c2	0	0	16	10	0	14	8	0	16	0	0	0	Bacteria	Chloroflexi	Chloroflexia	Thermomicrobiales	AKYG1722	AKYG1722	uncultured_Chloroflexi
8f7e684e4dfe5c460961fe37729c346f	0	0	14	0	26	0	24	0	0	0	0	0	Bacteria	Gemmatimonadota	Gemmatimonadetes	Gemmatimonadales	Gemmatimonadaceae	Gemmatimonas	uncultured_bacterium
3e0333405d5018bd491b4b181f251c26	17	13	0	0	0	0	15	11	0	0	0	7	Bacteria	Actinobacteriota	Actinobacteria	Frankiales	Sporichthyaceae	uncultured	uncultured_bacterium
c95d6e1c04d8100cfc4129e24958c4b1	10	0	11	0	0	6	11	0	7	0	9	9	Bacteria	Proteobacteria	Alphaproteobacteria	Rhodobacterales	Rhodobacteraceae	Amaricoccus	uncultured_bacterium
55297f8b5e8e02d09c0114ba5b1697b4	0	36	27	0	0	0	0	0	0	0	0	0	Bacteria	Chloroflexi	Anaerolineae	SBR1031	A4b	A4b	metagenome
ce743dc3aee537d7ed17da677a11e676	0	17	0	0	0	16	0	0	30	0	0	0	Bacteria	Proteobacteria	Alphaproteobacteria	Rhizobiales	Rhizobiaceae	Allorhizobium-Neorhizobium-Pararhizobium-Rhizobium	unidentified
bebf33bc870c214f89f14db447f781f7	0	0	39	0	0	24	0	0	0	0	0	0	Bacteria	Actinobacteriota	Actinobacteria	Propionibacteriales	Nocardioidaceae	Nocardioides	unidentified
93078229ac2d50cf3a788d268b50b80e	0	0	22	0	20	0	0	0	0	0	0	21	Bacteria	Acidobacteriota	Blastocatellia	Blastocatellales	Blastocatellaceae	JGI_0001001-H03	unidentified
5c9c53f75454ab644f2cb42edcce7ae7	0	0	11	0	11	9	6	0	7	0	10	9	Bacteria	Chloroflexi	Anaerolineae	Caldilineales	Caldilineaceae	Litorilinea	uncultured_bacterium
70defa79579549b427219b7aebe29008	0	0	10	0	6	11	0	0	12	0	0	24	Bacteria	Actinobacteriota	Actinobacteria	Frankiales	Sporichthyaceae	uncultured	uncultured_bacterium
13b021297a0bb4a11a86b7a4e0c4dae1	0	0	8	11	9	0	11	0	0	13	0	11	Bacteria	Chloroflexi	Chloroflexia	Thermomicrobiales	JG30-KF-CM45	JG30-KF-CM45	uncultured_Chloroflexi
8dfd7f79a9cae007290a199441da0db5	0	0	0	0	0	24	0	39	0	0	0	0	Bacteria	Actinobacteriota	Actinobacteria	Micromonosporales	Micromonosporaceae	Dactylosporangium	unidentified
a258a48bf99ac3ead26ea50bff5293fc	0	0	0	0	0	0	26	0	37	0	0	0	Bacteria	Actinobacteriota	Actinobacteria	Micromonosporales	Micromonosporaceae	Actinoplanes	unidentified
775ba1220ef02aeb5466b243f162873b	0	0	0	0	0	0	0	32	31	0	0	0	Bacteria	Proteobacteria	Alphaproteobacteria	Rhizobiales	Xanthobacteraceae	Rhodoplanes	uncultured_bacterium
b883e6746b051ff671642c6d1f4cd154	17	0	21	0	0	0	0	0	0	0	0	24	Bacteria	Planctomycetota	Phycisphaerae	Tepidisphaerales	WD2101_soil_group	WD2101_soil_group	unidentified
09e7baf4303a54d6178e6277401d0b90	12	0	0	9	2	0	0	15	11	0	0	13	Bacteria	Proteobacteria	Alphaproteobacteria	Rhizobiales	Rhizobiaceae	unidentified	unidentified
53d80c2c7ad43983f48d62abc1a061e6	0	0	38	0	0	0	0	0	0	0	24	0	Bacteria	Gemmatimonadota	Gemmatimonadetes	Gemmatimonadales	Gemmatimonadaceae	Gemmatimonas	Gemmatimonadaceae_bacterium
bb07da10dd4010244350756e95bdfbc7	0	0	31	0	12	0	0	0	19	0	0	0	Bacteria	Actinobacteriota	Actinobacteria	Micromonosporales	Micromonosporaceae	unidentified	unidentified
7ca442b6d74eb9bd26eb1a1976057489	0	0	0	0	18	0	27	0	17	0	0	0	Bacteria	Actinobacteriota	Actinobacteria	Frankiales	uncultured	uncultured	unidentified
319a3b89abaf6c5b0d6645ab5c9baf7b	30	0	31	0	0	0	0	0	0	0	0	0	Bacteria	Actinobacteriota	Actinobacteria	Micrococcales	Cellulomonadaceae	Cellulomonas	unidentified
efd5e69ad7771afc09d573cc94440d0c	29	0	0	0	0	0	0	0	32	0	0	0	Bacteria	Actinobacteriota	Actinobacteria	Corynebacteriales	Mycobacteriaceae	Mycobacterium	unidentified
6e9abc6c25d57b3175e5191d82bf12a8	8	0	10	0	17	16	9	0	0	0	1	0	Bacteria	Gemmatimonadota	Gemmatimonadetes	Gemmatimonadales	Gemmatimonadaceae	unidentified	unidentified
995848b11a50ffdb8b61aa85aebd66c5	8	0	10	13	0	0	0	13	0	7	0	10	Bacteria	Chloroflexi	KD4-96	KD4-96	KD4-96	KD4-96	uncultured_Chloroflexi
6c581ff73ddb0de935d92e98fee05c53	0	21	0	15	0	0	0	0	0	0	25	0	Bacteria	Bacteroidota	Bacteroidia	Chitinophagales	Saprospiraceae	uncultured	uncultured_Haliscomenobacter
c860601dd8cefdc9c5267a181402da69	0	0	38	0	0	0	0	0	0	0	23	0	Bacteria	Actinobacteriota	Actinobacteria	Pseudonocardiales	Pseudonocardiaceae	Pseudonocardia	unidentified
c974e03fb42dbb996087bccafa3870c4	0	0	13	0	17	0	0	0	0	0	13	18	Bacteria	Proteobacteria	Alphaproteobacteria	Rhizobiales	Devosiaceae	Devosia	unidentified
01d36610214f7bf5b5cf9033a7e23ebb	0	0	0	0	0	15	18	0	28	0	0	0	Bacteria	Chloroflexi	Anaerolineae	Anaerolineales	Anaerolineaceae	UTCFX1	unidentified
1c65ec0777a22af0eee4000b924e204a	0	0	0	0	0	0	21	4	0	0	0	36	Bacteria	Gemmatimonadota	Gemmatimonadetes	Gemmatimonadales	Gemmatimonadaceae	Gemmatimonas	Gemmatimonadaceae_bacterium
a7cd60e3ced459edc7346be70f9bf300	20	0	25	0	0	0	0	15	0	0	0	0	Bacteria	Proteobacteria	Alphaproteobacteria	Rhodobacterales	Rhodobacteraceae	Amaricoccus	uncultured_bacterium
e7589fabd431d6ff0b1a93b84e749471	5	6	9	3	0	0	9	4	0	8	10	6	Bacteria	Actinobacteriota	MB-A2-108	MB-A2-108	MB-A2-108	MB-A2-108	unidentified
2212c5b6632df6b4fe22f888fe8e4cc9	0	20	0	0	0	0	18	0	0	0	22	0	Bacteria	Actinobacteriota	Actinobacteria	Micromonosporales	Micromonosporaceae	unidentified	unidentified
0f40adba614d12a0c78d2fa10e054ef9	0	0	26	0	0	34	0	0	0	0	0	0	Bacteria	Proteobacteria	Alphaproteobacteria	Caulobacterales	Caulobacteraceae	Phenylobacterium	unidentified
4aa1265feaca57eee68209330cc50d61	0	0	18	22	0	0	0	0	20	0	0	0	Bacteria	Proteobacteria	Alphaproteobacteria	Rhizobiales	Rhizobiaceae	Mesorhizobium	unidentified
840de8bbcbb65e1c29bf64faee65982b	0	0	0	31	12	0	0	0	0	0	17	0	Bacteria	Actinobacteriota	MB-A2-108	MB-A2-108	MB-A2-108	MB-A2-108	uncultured_bacterium
17038db94019cf5c953a3b0408c8947a	0	0	0	27	17	0	0	0	0	0	16	0	Bacteria	Actinobacteriota	MB-A2-108	MB-A2-108	MB-A2-108	MB-A2-108	uncultured_bacterium
9f2c4bc2797978c1fbe483e6386cc36c	0	0	0	0	0	25	0	0	35	0	0	0	Bacteria	Gemmatimonadota	Gemmatimonadetes	Gemmatimonadales	Gemmatimonadaceae	uncultured	unidentified
bf16fec458bb372122582254133d63c2	0	0	0	0	0	16	25	0	19	0	0	0	Bacteria	Chloroflexi	P2-11E	P2-11E	P2-11E	P2-11E	uncultured_bacterium
66ce765b12c436fb4ab2bfda865edcf1	0	0	0	0	0	0	0	16	28	0	0	16	Bacteria	Actinobacteriota	Acidimicrobiia	Microtrichales	Ilumatobacteraceae	uncultured	uncultured_Acidimicrobiaceae
a0b9f62928332cebefefa0abf653b431	30	0	0	23	0	0	0	0	6	0	0	0	Bacteria	Proteobacteria	Alphaproteobacteria	Sphingomonadales	Sphingomonadaceae	Altererythrobacter	unidentified
2bde97b18a2d1064264b3bb47e191fd7	16	17	11	15	0	0	0	0	0	0	0	0	Bacteria	Actinobacteriota	Acidimicrobiia	IMCC26256	IMCC26256	IMCC26256	unidentified
5459da7387d02bc47bb20eec5e9a09a4	10	0	13	0	0	0	0	7	17	0	0	12	Bacteria	Gemmatimonadota	Gemmatimonadetes	Gemmatimonadales	Gemmatimonadaceae	Gemmatimonas	unidentified
8281645718f2f1e5419b26b29b723f8f	0	8	14	0	0	8	13	0	0	16	0	0	Bacteria	Actinobacteriota	Actinobacteria	Propionibacteriales	Propionibacteriaceae	Microlunatus	unidentified
5a982addd0a77a9f6755c76886802195	0	3	13	0	8	0	0	7	10	6	5	7	Bacteria	Proteobacteria	Alphaproteobacteria	Rhodobacterales	Rhodobacteraceae	Amaricoccus	uncultured_Amaricoccus
4926f33f650cec69bb460c6582e4d3e2	0	0	18	0	0	0	0	0	0	0	20	21	Bacteria	Actinobacteriota	Actinobacteria	Pseudonocardiales	Pseudonocardiaceae	Pseudonocardia	unidentified
9aa14c75efb399a7feb79a16f019e82b	0	0	6	7	0	0	8	7	9	7	7	8	Bacteria	Chloroflexi	Anaerolineae	RBG-13-54-9	RBG-13-54-9	RBG-13-54-9	unidentified
179b8770446b44a64b33e32407a0218c	0	0	0	31	0	0	0	0	28	0	0	0	Bacteria	Actinobacteriota	Actinobacteria	Propionibacteriales	Nocardioidaceae	Nocardioides	Nocardioides_dilutus
80018a7bb93467c689d3e4156953ffb7	0	0	0	0	12	0	0	0	12	17	18	0	Bacteria	Chloroflexi	Anaerolineae	Caldilineales	Caldilineaceae	uncultured	metagenome
caea8786c971759923ad6423897edc9b	0	0	0	0	0	0	32	0	0	0	27	0	Bacteria	Gemmatimonadota	Gemmatimonadetes	Gemmatimonadales	Gemmatimonadaceae	unidentified	unidentified
58a25855c7896890c82eca1d6a9a6f7f	0	0	0	0	0	0	0	0	22	0	37	0	Bacteria	Patescibacteria	Saccharimonadia	Saccharimonadales	Saccharimonadales	Saccharimonadales	unidentified
0bf468e92a7894f4731e0e62692d01c3	17	0	41	0	0	0	0	0	0	0	0	0	Bacteria	Proteobacteria	Alphaproteobacteria	Rhizobiales	Rhizobiaceae	Mesorhizobium	unidentified
b11e2c58af4d053d69d6219a2598e9e0	8	0	0	8	7	0	5	8	0	0	17	5	Bacteria	Actinobacteriota	Actinobacteria	Propionibacteriales	Nocardioidaceae	Nocardioides	unidentified
45733a70e42664cd7b3b1214a4f28d3d	0	18	21	0	0	0	0	19	0	0	0	0	Bacteria	Proteobacteria	Alphaproteobacteria	Rhodobacterales	Rhodobacteraceae	Amaricoccus	uncultured_bacterium
f906557cb957a88bf7c6d25feee4e32d	0	9	10	0	7	0	0	0	16	9	7	0	Bacteria	Gemmatimonadota	Gemmatimonadetes	Gemmatimonadales	Gemmatimonadaceae	Gemmatimonas	unidentified
d4e86c16bac1b45c143befe18720c1b3	0	6	0	6	0	0	12	8	19	0	7	0	Bacteria	Acidobacteriota	Subgroup_5	Subgroup_5	Subgroup_5	Subgroup_5	uncultured_bacterium
fc535abab9ed1a365e1256b7685b5849	0	3	8	8	4	16	3	5	5	2	2	2	Bacteria	Bacteroidota	Bacteroidia	Chitinophagales	Saprospiraceae	uncultured	unidentified
ff3196e85631823747ca28b7361d7281	0	0	27	0	0	0	0	0	0	31	0	0	Bacteria	Proteobacteria	Alphaproteobacteria	Sphingomonadales	Sphingomonadaceae	Sphingobium	unidentified
9ff8fdf785942e71db23625bf7ac551d	0	0	21	0	0	0	0	0	20	0	17	0	Bacteria	Actinobacteriota	Actinobacteria	Micromonosporales	Micromonosporaceae	unidentified	unidentified
676338c1242fbf6192ecb5cc52e9ed2c	0	0	11	0	8	0	15	11	0	0	0	13	Bacteria	Actinobacteriota	Thermoleophilia	Solirubrobacterales	Solirubrobacteraceae	Conexibacter	uncultured_bacterium
aabd5cc362b8267db25d0309e003be5b	0	0	11	5	0	14	10	0	7	0	11	0	Bacteria	Chloroflexi	Chloroflexia	Thermomicrobiales	AKYG1722	AKYG1722	unidentified
a51ab77c301073edeb1715cfea6ef2a3	0	0	0	9	7	0	0	7	10	25	0	0	Bacteria	Proteobacteria	Alphaproteobacteria	Rhizobiales	Rhodomicrobiaceae	Rhodomicrobium	unidentified
e23a19ff026712b0af24ce199cdaab1b	0	0	0	0	13	9	14	11	11	0	0	0	Bacteria	Actinobacteriota	Actinobacteria	Frankiales	Nakamurellaceae	Nakamurella	metagenome
1f735da60212178265d33b650b8dc3be	0	0	0	0	0	0	0	0	0	0	30	28	Bacteria	Actinobacteriota	Actinobacteria	Propionibacteriales	Nocardioidaceae	Marmoricola	unidentified
12d1024beffa8012fb787d1df9e2e88f	20	10	0	11	0	16	0	0	0	0	0	0	Bacteria	Acidobacteriota	Holophagae	Subgroup_7	Subgroup_7	Subgroup_7	unidentified
aa801abb6073c69475ea8363d41ee47a	13	7	0	0	0	0	0	11	0	10	0	16	Bacteria	Chloroflexi	Chloroflexia	Thermomicrobiales	AKYG1722	AKYG1722	uncultured_Chloroflexi
6dfaa68fa35ab4e77ce016dfff522e19	0	15	0	21	0	0	0	21	0	0	0	0	Bacteria	Proteobacteria	Alphaproteobacteria	Rhizobiales	uncultured	uncultured	uncultured_Alphaproteobacteria
75312592ca6064140f6b4c95231d8aa6	0	12	0	0	13	0	0	0	0	17	15	0	Bacteria	Proteobacteria	Alphaproteobacteria	Rhizobiales	Xanthobacteraceae	unidentified	unidentified
0e5ba5e15816ada84270d1a540922848	0	0	18	0	0	0	0	0	32	4	0	3	Bacteria	Gemmatimonadota	Gemmatimonadetes	Gemmatimonadales	Gemmatimonadaceae	uncultured	unidentified
34e6cad269ccc8ab58bd179bc6863cc1	0	0	10	0	19	0	17	11	0	0	0	0	Bacteria	Bacteroidota	Bacteroidia	Flavobacteriales	Flavobacteriaceae	Flavobacterium	unidentified
21508ba0e969a452b25d0c1aadbddb45	0	0	0	0	0	0	31	0	26	0	0	0	Bacteria	Patescibacteria	Saccharimonadia	Saccharimonadales	unidentified	unidentified	unidentified
dc8d9967661eaf802d0169c6819cf60b	33	0	0	23	0	0	0	0	0	0	0	0	Bacteria	Actinobacteriota	Actinobacteria	Propionibacteriales	Nocardioidaceae	Nocardioides	Nocardioides_terrigena
383d523798565393c16c4be919606704	18	0	15	0	0	0	23	0	0	0	0	0	Bacteria	Proteobacteria	Alphaproteobacteria	Azospirillales	Azospirillaceae	Skermanella	unidentified
db10b6dec2b10b5872ec060c674baa63	2	9	0	0	4	18	0	3	0	20	0	0	Bacteria	Actinobacteriota	Actinobacteria	Micromonosporales	Micromonosporaceae	Luedemannella	unidentified
19d63a41a28f0afb2658ad5836ca779b	0	16	14	0	26	0	0	0	0	0	0	0	Bacteria	Actinobacteriota	Actinobacteria	Micrococcales	Demequinaceae	Demequina	uncultured_bacterium
51d5abe3bacbcc11a92ef1cc7b04ff0b	0	0	20	0	0	17	19	0	0	0	0	0	Bacteria	Chloroflexi	Anaerolineae	SBR1031	A4b	A4b	uncultured_soil
bef8fdf4fe86c35e731e1ba15b16d055	0	0	18	0	0	0	0	0	0	24	14	0	Bacteria	Bacteroidota	Bacteroidia	Flavobacteriales	Flavobacteriaceae	Flavobacterium	unidentified
ae1ed4177882214996ce57af12739db7	0	0	0	18	0	7	13	0	18	0	0	0	Bacteria	Chloroflexi	JG30-KF-CM66	JG30-KF-CM66	JG30-KF-CM66	JG30-KF-CM66	metagenome
334de3b2596e0fd0679a9360a266093a	0	0	0	6	0	25	0	0	0	0	0	25	Bacteria	Gemmatimonadota	Gemmatimonadetes	Gemmatimonadales	Gemmatimonadaceae	uncultured	unidentified
7e5244cfa629fe6592aea281930b7e10	0	0	0	0	0	17	11	0	0	0	0	28	Bacteria	Gemmatimonadota	Gemmatimonadetes	Gemmatimonadales	Gemmatimonadaceae	Gemmatimonas	unidentified
c183376a9fac601b3c6cf2aae72f13ae	0	0	0	0	0	0	30	0	0	0	0	26	Bacteria	Actinobacteriota	Acidimicrobiia	Microtrichales	Ilumatobacteraceae	uncultured	uncultured_bacterium
f814e3174dd5fef1fc902abc36999aae	0	9	0	0	0	9	7	0	0	16	9	5	Bacteria	Gemmatimonadota	Gemmatimonadetes	Gemmatimonadales	Gemmatimonadaceae	uncultured	unidentified
e951f443421b8d768d80b4d8f8506a86	0	8	11	0	6	0	0	0	12	11	7	0	Bacteria	Gemmatimonadota	Gemmatimonadetes	Gemmatimonadales	Gemmatimonadaceae	Gemmatimonas	unidentified
2d0b6022108d967da344b4f9e6802b22	0	0	2	0	0	0	0	0	28	25	0	0	Bacteria	Proteobacteria	Alphaproteobacteria	Sphingomonadales	Sphingomonadaceae	Sphingomonas	unidentified
87983ef94f102bf97cb1c15b99b58c51	0	0	0	20	0	0	11	0	12	12	0	0	Bacteria	Chloroflexi	KD4-96	KD4-96	KD4-96	KD4-96	unidentified
8fc0107615bf432981db9ce9edc6f9ac	0	0	0	16	15	0	0	0	8	16	0	0	Bacteria	Actinobacteriota	Actinobacteria	Micromonosporales	Micromonosporaceae	Actinoplanes	unidentified
8dd19408cca11d10e43335eb1d99b56c	0	0	0	8	0	10	0	16	0	19	0	2	Bacteria	Chloroflexi	Chloroflexia	Thermomicrobiales	JG30-KF-CM45	JG30-KF-CM45	uncultured_Chloroflexi
0570afb0007b3848b009ce7652a013ca	0	0	0	1	18	0	0	0	18	18	0	0	Bacteria	Firmicutes	Clostridia	Clostridiales	Clostridiaceae	Clostridium_sensu_stricto_13	uncultured_bacterium
b12b92dcf148051371d6c6de86d1db1b	0	0	0	0	10	0	22	0	23	0	0	0	Bacteria	Acidobacteriota	Blastocatellia	Blastocatellales	Blastocatellaceae	JGI_0001001-H03	unidentified
afe846eda141c227b00dd9f8a10f7730	0	0	0	0	0	0	0	30	0	0	0	25	Bacteria	Actinobacteriota	Acidimicrobiia	Microtrichales	uncultured	uncultured	uncultured_bacterium
4eafbdc8334c0acfdfc020e59e234409	18	0	26	0	0	10	0	0	0	0	0	0	Bacteria	Actinobacteriota	Actinobacteria	Propionibacteriales	Nocardioidaceae	Nocardioides	unidentified
d6c8f7d4342f4fce101ca2c2252a0b3d	4	7	5	3	0	0	6	1	6	6	9	7	Bacteria	Gemmatimonadota	Gemmatimonadetes	Gemmatimonadales	Gemmatimonadaceae	Gemmatimonas	unidentified
d36722ee22de30f0b8a974fa31cea5de	0	9	0	0	12	9	10	0	0	0	0	14	Bacteria	Bacteroidota	Bacteroidia	Cytophagales	Hymenobacteraceae	Hymenobacter	unidentified
7797678a614bad41a299c232da35d42e	0	0	18	0	0	0	19	0	17	0	0	0	Bacteria	Proteobacteria	Alphaproteobacteria	Sphingomonadales	Sphingomonadaceae	unidentified	unidentified
242905f2c763a4e03082f60dd184940d	0	0	13	0	11	0	15	0	15	0	0	0	Bacteria	Proteobacteria	Alphaproteobacteria	Tistrellales	Geminicoccaceae	Candidatus_Alysiosphaera	unidentified
74525f689ef89af507cdb664190a0409	0	0	10	0	15	0	0	0	0	0	0	29	Bacteria	Acidobacteriota	Blastocatellia	Blastocatellales	Blastocatellaceae	JGI_0001001-H03	unidentified
e8dbc684a2ea00c8a8b0b43147b99e5e	0	0	0	15	0	0	10	11	0	0	0	18	Bacteria	Chloroflexi	KD4-96	KD4-96	KD4-96	KD4-96	unidentified
68b00cd1e79e291f259edc8f04eb5e9c	0	0	0	12	0	0	17	0	11	0	0	14	Bacteria	Proteobacteria	Alphaproteobacteria	Rhizobiales	Rhizobiales_Incertae_Sedis	Bauldia	uncultured_bacterium
71e4196a5a696d37189f5749c3bc8e79	0	0	0	11	10	0	9	0	6	9	0	9	Bacteria	Actinobacteriota	Acidimicrobiia	IMCC26256	IMCC26256	IMCC26256	uncultured_Ferrimicrobium
0513a3c2b09c47c78e5cc2a021bbdac7	15	0	0	19	0	0	19	0	0	0	0	0	Bacteria	Planctomycetota	Phycisphaerae	Phycisphaerales	Phycisphaeraceae	AKYG587	uncultured_planctomycete
0f284b0c08d157361294e36c21bfe505	12	6	8	0	7	0	9	0	6	5	0	0	Bacteria	Chloroflexi	JG30-KF-CM66	JG30-KF-CM66	JG30-KF-CM66	JG30-KF-CM66	uncultured_bacterium
d59e75fe986990ae3d8b841fbfd19f9d	0	3	1	9	0	6	0	8	10	2	7	7	Bacteria	Actinobacteriota	Actinobacteria	Propionibacteriales	Propionibacteriaceae	Microlunatus	uncultured_actinobacterium
849f6161b74fd1b27faed2df2a12c309	0	0	30	23	0	0	0	0	0	0	0	0	Bacteria	Bdellovibrionota	Bdellovibrionia	Bdellovibrionales	Bdellovibrionaceae	OM27_clade	metagenome
a34bab78ff0e9e24def3e83586d14abc	0	0	23	0	0	30	0	0	0	0	0	0	Bacteria	Proteobacteria	Alphaproteobacteria	Caulobacterales	Caulobacteraceae	Phenylobacterium	unidentified
8fc115997fe883a6374f09779944ddd4	0	0	13	9	9	0	11	11	0	0	0	0	Bacteria	unidentified	unidentified	unidentified	unidentified	unidentified	unidentified
bd2d6d01200b08e7b6b4e04c9626c13a	0	0	9	0	5	7	3	0	12	1	8	8	Bacteria	Gemmatimonadota	Gemmatimonadetes	Gemmatimonadales	Gemmatimonadaceae	Gemmatimonas	unidentified
c3cf588e44d5909574f4ef1577abfa5b	0	0	5	14	0	8	12	6	0	0	0	8	Bacteria	Chloroflexi	KD4-96	KD4-96	KD4-96	KD4-96	uncultured_Chloroflexi
7c3754401bd4726d87c9aa0260e23f9c	14	0	0	0	0	13	11	0	0	0	0	14	Bacteria	Proteobacteria	Alphaproteobacteria	Rhizobiales	Xanthobacteraceae	Rhodoplanes	uncultured_bacterium
03bae328dbe76605f422a96639f71a4b	8	15	0	0	0	0	16	0	13	0	0	0	Bacteria	Proteobacteria	Alphaproteobacteria	Caulobacterales	Caulobacteraceae	Phenylobacterium	unidentified
34206802b4c0c1d36d95224a8181a893	3	6	8	6	0	4	7	9	0	0	0	9	Bacteria	Actinobacteriota	Actinobacteria	Propionibacteriales	Nocardioidaceae	Nocardioides	unidentified
5ec2e796c5de7d8b6951a26da21436a9	0	33	19	0	0	0	0	0	0	0	0	0	Bacteria	Actinobacteriota	Actinobacteria	Micrococcales	Promicromonosporaceae	Promicromonospora	unidentified
b33d67c222eb580faaa8475346f045cb	0	9	3	0	13	0	9	7	4	0	0	7	Bacteria	Actinobacteriota	Actinobacteria	Micromonosporales	Micromonosporaceae	unidentified	unidentified
84b5add53572ed0b05abe9ce48b03ae0	0	5	7	7	0	10	13	0	0	0	0	10	Bacteria	Chloroflexi	TK10	TK10	TK10	TK10	uncultured_bacterium
52a15018821a865ecef205a4511a4a3e	0	0	17	0	12	0	0	0	0	23	0	0	Bacteria	Proteobacteria	Alphaproteobacteria	Caulobacterales	Caulobacteraceae	Phenylobacterium	unidentified
1f76132b3cb753b2bc505fcd68181847	0	0	0	33	0	0	0	0	0	0	19	0	Bacteria	Firmicutes	Clostridia	Clostridiales	Clostridiaceae	Clostridium_sensu_stricto_1	unidentified
e1226c8683761ab3fd14bd87bd049719	0	0	0	12	9	7	13	0	11	0	0	0	Bacteria	Actinobacteriota	Acidimicrobiia	IMCC26256	IMCC26256	IMCC26256	uncultured_bacterium
d478a7b3287b621da36305e943d135f3	0	0	0	10	10	4	0	0	9	0	1	18	Bacteria	Proteobacteria	Alphaproteobacteria	Rhizobiales	Devosiaceae	Devosia	unidentified
43c6248e0684f76fa7ce06027508bc4f	0	0	0	8	0	9	11	0	11	7	6	0	Bacteria	Actinobacteriota	Acidimicrobiia	Microtrichales	Ilumatobacteraceae	uncultured	unidentified
07de90316163e8efe7a86a75e0143095	0	0	0	0	0	15	0	0	37	0	0	0	Bacteria	Actinobacteriota	Actinobacteria	Micromonosporales	Micromonosporaceae	Dactylosporangium	unidentified
9ccd7a38ccf97a40a5a1205129920521	0	0	0	0	0	11	41	0	0	0	0	0	Bacteria	Proteobacteria	Alphaproteobacteria	Rhizobiales	Rhizobiales_Incertae_Sedis	Nordella	unidentified
e8ee024121fbd5e07257114e8b64645f	11	0	0	0	0	0	0	22	0	0	0	18	Bacteria	Chloroflexi	KD4-96	KD4-96	KD4-96	KD4-96	uncultured_Chloroflexi
0ee456774e0d49f492b05a7ac817c301	7	7	0	0	10	12	0	0	7	8	0	0	Bacteria	Planctomycetota	Phycisphaerae	Tepidisphaerales	WD2101_soil_group	WD2101_soil_group	unidentified
506ae7a5e81ee1969205a603b92a5318	1	24	3	0	2	1	1	17	1	0	0	1	Bacteria	Gemmatimonadota	Gemmatimonadetes	Gemmatimonadales	Gemmatimonadaceae	uncultured	unidentified
eec1983295d9563e73f7f4be6c6ff732	0	18	0	18	0	0	0	0	0	15	0	0	Bacteria	Proteobacteria	Alphaproteobacteria	Sphingomonadales	Sphingomonadaceae	unidentified	unidentified
6bb63fb71afcd2d4af6cd77761d125d0	0	6	0	0	9	0	9	0	11	4	12	0	Bacteria	Gemmatimonadota	Gemmatimonadetes	Gemmatimonadales	Gemmatimonadaceae	Gemmatimonas	unidentified
57fbb6832b080fee5346bd198ab46108	0	0	11	12	0	11	0	0	0	0	17	0	Bacteria	Actinobacteriota	Actinobacteria	Corynebacteriales	Mycobacteriaceae	Mycobacterium	unidentified
4af74e54a8b23e3eed3a40477d357f5d	0	0	9	0	0	0	0	0	0	14	13	15	Bacteria	Actinobacteriota	Actinobacteria	Corynebacteriales	Mycobacteriaceae	Mycobacterium	unidentified
4c0fae073a89b2e42a4824935c26a64a	0	0	0	28	0	0	0	0	23	0	0	0	Bacteria	Actinobacteriota	Actinobacteria	PeM15	PeM15	PeM15	uncultured_bacterium
529403ad4e0d699ddf0db5250aa689c4	0	0	0	16	13	0	0	12	0	0	10	0	Bacteria	Actinobacteriota	Actinobacteria	Propionibacteriales	Nocardioidaceae	Aeromicrobium	uncultured_bacterium
a36330e6345d58420cc5627822d72e8f	0	0	0	0	0	0	19	0	22	0	0	10	Bacteria	Armatimonadota	uncultured	uncultured	uncultured	uncultured	uncultured_actinobacterium
b463eaddbc96026f22b9bb21eb1a6cc5	0	0	0	0	0	0	12	0	14	17	8	0	Bacteria	Gemmatimonadota	Gemmatimonadetes	Gemmatimonadales	Gemmatimonadaceae	uncultured	unidentified
6667b0183e0f347079c148f169d6dad8	0	0	0	0	0	0	0	0	26	25	0	0	Bacteria	Actinobacteriota	Actinobacteria	Propionibacteriales	Nocardioidaceae	Nocardioides	Nocardioides_terrigena
c5cedf59e2a953a1b447958bed60bd84	0	0	0	0	0	0	0	0	0	11	40	0	Bacteria	Proteobacteria	Gammaproteobacteria	Cellvibrionales	Cellvibrionaceae	Cellvibrio	uncultured_gamma
de4d0831a20890a9568c29415584eca2	11	0	0	0	12	0	10	8	0	0	0	9	Bacteria	Actinobacteriota	Actinobacteria	Frankiales	Sporichthyaceae	uncultured	uncultured_bacterium
2d71b8ff0c0be8c57c708d735b6501e4	9	8	13	0	0	0	0	0	15	0	5	0	Bacteria	Planctomycetota	Planctomycetes	Planctomycetales	uncultured	uncultured	metagenome
b1368bc13763f668a070ef79fad24079	0	11	0	0	10	17	0	0	0	12	0	0	Bacteria	Chloroflexi	KD4-96	KD4-96	KD4-96	KD4-96	unidentified
6f861212a16235910f1623c46ad18a35	0	0	18	0	12	0	0	5	10	5	0	0	Bacteria	Proteobacteria	Alphaproteobacteria	Rhizobiales	Hyphomicrobiaceae	Pedomicrobium	unidentified
64ae1632215d4b10b4230502e27b1d36	0	0	11	9	0	0	0	0	10	12	8	0	Bacteria	Chloroflexi	Chloroflexia	Chloroflexales	Roseiflexaceae	uncultured	uncultured_bacterium
c8e9a0748304870b4be4323a5d6cf2ef	0	0	0	19	0	0	0	0	0	0	0	31	Bacteria	Actinobacteriota	Actinobacteria	Pseudonocardiales	Pseudonocardiaceae	Pseudonocardia	uncultured_bacterium
5f42ef060d55b70712169c1e801d01a2	0	0	0	19	31	0	0	0	0	0	0	0	Bacteria	Actinobacteriota	Acidimicrobiia	Microtrichales	Ilumatobacteraceae	uncultured	uncultured_bacterium
2ab7f5b73fab8cbee9ad3972dda4201c	0	0	0	14	0	12	0	0	0	0	24	0	Bacteria	Proteobacteria	Alphaproteobacteria	Rickettsiales	Mitochondria	Mitochondria	Pythium_ultimum
1dff410b7cd913504ed70aee4a7d3a09	0	0	0	0	17	0	0	0	0	0	10	23	Bacteria	Bacteroidota	Bacteroidia	Flavobacteriales	Flavobacteriaceae	Flavobacterium	unidentified
7adee4a4c316b262d47ebadd2b362e20	0	0	0	0	0	14	0	0	0	17	0	19	Bacteria	Proteobacteria	Alphaproteobacteria	Tistrellales	Geminicoccaceae	Candidatus_Alysiosphaera	metagenome
3656086442e1edd6d4105e955b7075ff	0	0	0	0	0	0	0	0	0	30	0	20	Bacteria	Gemmatimonadota	Gemmatimonadetes	Gemmatimonadales	Gemmatimonadaceae	uncultured	unidentified
0dbe969f80acdbaeff493b07c949b86a	30	0	0	0	0	0	0	0	19	0	0	0	Bacteria	Actinobacteriota	MB-A2-108	MB-A2-108	MB-A2-108	MB-A2-108	unidentified
65d0df0f438c65516775ee2c25381097	26	0	0	0	0	23	0	0	0	0	0	0	Bacteria	Actinobacteriota	Acidimicrobiia	Microtrichales	Ilumatobacteraceae	uncultured	uncultured_Acidimicrobiaceae
26fe5f9a8333ec391111b46d8887cf40	20	0	0	13	0	0	16	0	0	0	0	0	Bacteria	Chloroflexi	Anaerolineae	Caldilineales	Caldilineaceae	uncultured	metagenome
16f8e21c3f52f2f6663c7d2fc6e49b26	19	1	3	0	17	1	1	1	3	0	3	0	Bacteria	Actinobacteriota	Actinobacteria	Pseudonocardiales	Pseudonocardiaceae	Pseudonocardia	uncultured_bacterium
2803aaaa482ce5fdd01adecd446dab15	15	14	0	0	11	0	0	9	0	0	0	0	Bacteria	Chloroflexi	KD4-96	KD4-96	KD4-96	KD4-96	metagenome
3eb304c2338b4d934db3b9af691ddbdf	15	0	0	22	10	0	0	0	2	0	0	0	Bacteria	Proteobacteria	Alphaproteobacteria	Rhizobiales	Devosiaceae	unidentified	unidentified
3d4e0a3e82c29c8050278365398f0574	12	11	10	0	0	0	0	0	6	10	0	0	Bacteria	Actinobacteriota	Actinobacteria	Frankiales	Nakamurellaceae	Nakamurella	uncultured_Nakamurellaceae
0394cbdb2831d83e3063623877573afe	8	0	0	0	18	12	0	0	0	0	11	0	Bacteria	Planctomycetota	Phycisphaerae	Tepidisphaerales	WD2101_soil_group	WD2101_soil_group	unidentified
69f35664a4828a102ac06224827d06f3	6	0	14	0	0	10	0	0	0	15	4	0	Bacteria	Actinobacteriota	Actinobacteria	Frankiales	uncultured	uncultured	unidentified
9bb98aeaa162421b45f5e896517ff581	1	10	3	0	0	10	0	0	0	8	17	0	Bacteria	Actinobacteriota	Actinobacteria	Micrococcales	Microbacteriaceae	Microbacterium	unidentified
1bb60adce0c9b6211079e45cf4f1cf02	0	31	0	0	0	18	0	0	0	0	0	0	Bacteria	Proteobacteria	Alphaproteobacteria	Dongiales	Dongiaceae	Dongia	metagenome
cc5e5be7f839417996a6c7b7ad44f14f	0	25	0	0	0	0	0	0	0	0	24	0	Bacteria	Acidobacteriota	Holophagae	Subgroup_7	Subgroup_7	Subgroup_7	unidentified
380da6681c303eec26279620515b2ef2	0	21	0	0	0	0	0	0	28	0	0	0	Bacteria	Actinobacteriota	Actinobacteria	Propionibacteriales	Propionibacteriaceae	Microlunatus	unidentified
a60a3427196b63d4c396db234ac44711	0	15	9	0	15	0	0	0	0	10	0	0	Bacteria	Proteobacteria	Alphaproteobacteria	Rhizobiales	Rhizobiaceae	Allorhizobium-Neorhizobium-Pararhizobium-Rhizobium	Rhizobium_metallidurans
973501655b0b0a6cd1616c0b108d44ab	0	10	9	0	5	0	23	0	0	2	0	0	Bacteria	Actinobacteriota	Acidimicrobiia	Microtrichales	Iamiaceae	Iamia	metagenome
97185cd0c8a70678c6dbb90e6268a15a	0	0	13	10	0	3	9	0	3	0	3	8	Bacteria	Chloroflexi	Anaerolineae	Ardenticatenales	uncultured	uncultured	uncultured_Litorilinea
0603255fd631b9578da114143a7931f4	0	0	11	0	0	0	11	10	0	17	0	0	Bacteria	Chloroflexi	Dehalococcoidia	S085	S085	S085	metagenome
bb61611cbebd019f48d3a6fab791beb3	0	0	11	0	0	12	0	20	6	0	0	0	Bacteria	Gemmatimonadota	Gemmatimonadetes	Gemmatimonadales	Gemmatimonadaceae	Gemmatimonas	uncultured_soil
2772d2468117e57969b94f616da9a939	0	0	0	25	0	0	0	0	0	0	24	0	Bacteria	Proteobacteria	Alphaproteobacteria	Defluviicoccales	Defluviicoccaceae	Defluviicoccus	uncultured_bacterium
a385f69304e8eda22e64d54fc61e4928	0	0	0	13	0	19	17	0	0	0	0	0	Bacteria	Proteobacteria	Alphaproteobacteria	Sphingomonadales	Sphingomonadaceae	Altererythrobacter	unidentified
113bd47385298e015e8af612dddfe572	0	0	0	12	8	0	8	0	0	0	11	10	Bacteria	Chloroflexi	TK10	TK10	TK10	TK10	metagenome
bb9ecf2d6ad3d30dc30442068b101652	0	0	0	0	0	28	0	0	0	0	21	0	Bacteria	Gemmatimonadota	Gemmatimonadetes	Gemmatimonadales	Gemmatimonadaceae	uncultured	unidentified
157adaa589dfd0161cb7186a986d566b	0	0	0	0	0	0	27	0	0	0	22	0	Bacteria	Gemmatimonadota	Gemmatimonadetes	Gemmatimonadales	Gemmatimonadaceae	Gemmatimonas	unidentified
a8ec8edeac53d8fd7e1ec2c56b9e24fd	0	0	0	0	0	0	14	0	12	14	9	0	Bacteria	Planctomycetota	Phycisphaerae	Phycisphaerales	Phycisphaeraceae	SM1A02	uncultured_prokaryote
17bc05c34d42a96ae24902bc4c84b837	0	0	0	0	0	0	0	0	25	0	24	0	Bacteria	Acidobacteriota	Holophagae	Subgroup_7	Subgroup_7	Subgroup_7	unidentified
d78b9e83af83b1e300617a0f18e219bf	20	0	0	0	0	0	0	12	16	0	0	0	Bacteria	Chloroflexi	KD4-96	KD4-96	KD4-96	KD4-96	unidentified
48a1eabd4b23260edfb3b94bda3c2e36	0	13	12	11	0	0	0	0	0	12	0	0	Bacteria	Proteobacteria	Alphaproteobacteria	Rhizobiales	Rhizobiales_Incertae_Sedis	uncultured	unidentified
60d71a0620dbe56ec6f3646bee734a14	0	0	12	0	0	0	7	11	8	10	0	0	Bacteria	Planctomycetota	Pla4_lineage	Pla4_lineage	Pla4_lineage	Pla4_lineage	uncultured_bacterium
8226623c4489ace399c943d79116c0fd	0	0	0	20	15	13	0	0	0	0	0	0	Bacteria	Chloroflexi	Anaerolineae	RBG-13-54-9	RBG-13-54-9	RBG-13-54-9	uncultured_sludge
d41cade1b6612562225db0e3d700cb45	0	0	0	17	0	0	0	0	19	0	12	0	Bacteria	Chloroflexi	Chloroflexia	Thermomicrobiales	AKYG1722	AKYG1722	uncultured_soil
49ca409233d8ba7e9e6392bb3cfaea6f	0	0	0	0	8	0	9	12	9	10	0	0	Bacteria	Cyanobacteria	Cyanobacteriia	Chloroplast	Chloroplast	Chloroplast	unidentified
6b32d68a66ae3123fc81ba227854399c	0	0	0	0	0	0	0	0	7	15	26	0	Bacteria	Actinobacteriota	Actinobacteria	Micromonosporales	Micromonosporaceae	unidentified	unidentified
8620b2ddb2f08a0dbfb790b782a589b2	9	0	0	0	0	0	15	10	0	13	0	0	Bacteria	Actinobacteriota	Actinobacteria	Micromonosporales	Micromonosporaceae	Rhizocola	uncultured_bacterium
aa1df060a49765cd12091314216c54ee	7	2	1	4	1	1	7	7	3	1	1	12	Bacteria	Bacteroidota	Kapabacteria	Kapabacteriales	Kapabacteriales	Kapabacteriales	unidentified
ad71fb3e29d686d77ff0ccac545dcf65	0	14	11	0	0	6	0	9	0	0	2	5	Bacteria	Chloroflexi	KD4-96	KD4-96	KD4-96	KD4-96	unidentified
7a74b0d7364463d7bf2d7b6fd4bd5487	0	13	0	0	0	0	24	0	9	0	1	0	Bacteria	Gemmatimonadota	Gemmatimonadetes	Gemmatimonadales	Gemmatimonadaceae	Gemmatimonas	unidentified
3938e00201f48dd9890eac34f89b9bd0	0	6	0	0	8	5	11	0	8	0	0	9	Bacteria	Cyanobacteria	Cyanobacteriia	Cyanobacteriales	Nostocaceae	unidentified	unidentified
57e8c16aa0f59c2843cdd2f6757da6db	0	0	13	0	0	0	18	0	0	0	16	0	Bacteria	Bacteroidota	Bacteroidia	Cytophagales	Hymenobacteraceae	Hymenobacter	Flexibacteraceae_bacterium
7e3dc0eb3671be4fa441f1253e4c967d	0	0	11	9	0	0	27	0	0	0	0	0	Bacteria	Proteobacteria	Alphaproteobacteria	Rhodobacterales	Rhodobacteraceae	unidentified	unidentified
4a3f5d4a82c704479f96a53d7b310f92	0	0	0	0	29	0	0	0	18	0	0	0	Bacteria	Gemmatimonadota	Gemmatimonadetes	Gemmatimonadales	Gemmatimonadaceae	Gemmatimonas	Gemmatimonadaceae_bacterium
2a7f144a25e75eee1e2cbb6f45e8f0dd	0	0	0	0	13	0	0	0	0	18	16	0	Bacteria	Gemmatimonadota	Gemmatimonadetes	Gemmatimonadales	Gemmatimonadaceae	unidentified	unidentified
fc5d5b35b7f5bb7ff339a9caeed50407	0	0	0	0	7	16	8	0	11	3	2	0	Bacteria	Gemmatimonadota	Gemmatimonadetes	Gemmatimonadales	Gemmatimonadaceae	Gemmatimonas	unidentified
6a0dcca1bebfb42e08b1c5a9f6b36ca4	0	0	0	0	0	0	24	23	0	0	0	0	Bacteria	Actinobacteriota	Actinobacteria	Micromonosporales	Micromonosporaceae	Actinoplanes	unidentified
b1ffe84dd1bdf6d0af8f9899e809b904	32	0	0	0	0	0	0	0	0	0	0	14	Bacteria	WS2	WS2	WS2	WS2	WS2	uncultured_soil
6f43dfd509c90ac945b3bf5a4f041c73	17	0	0	11	1	0	0	0	0	4	12	1	Bacteria	Actinobacteriota	Actinobacteria	Propionibacteriales	Nocardioidaceae	Nocardioides	unidentified
9a5d712760d1dfec841dc0fbf7272c99	16	0	0	0	0	0	0	0	17	0	0	13	Bacteria	Actinobacteriota	Actinobacteria	Corynebacteriales	Mycobacteriaceae	Mycobacterium	unidentified
79bb1cf99d67a26ad5ab1ac971be76aa	10	0	6	0	12	10	0	0	0	0	0	8	Bacteria	Patescibacteria	Parcubacteria	Parcubacteria	Parcubacteria	Parcubacteria	uncultured_bacterium
fef3dc7e3b559b53fb03ae514a683e63	9	0	6	3	0	8	0	0	0	0	9	11	Bacteria	Proteobacteria	Alphaproteobacteria	Rhizobiales	Hyphomicrobiaceae	unidentified	unidentified
2f6350405062d74cae7bb65e9bffdba0	7	10	0	6	9	0	0	0	0	0	0	14	Bacteria	Proteobacteria	Alphaproteobacteria	Caulobacterales	Caulobacteraceae	Brevundimonas	unidentified
0e85bc317f4103bfd2b73c1883ceabac	0	20	0	0	0	0	0	10	0	16	0	0	Bacteria	Planctomycetota	Phycisphaerae	Tepidisphaerales	WD2101_soil_group	WD2101_soil_group	unidentified
5192b6d124904aebb9df3ff5639efc70	0	6	0	0	0	8	0	0	21	11	0	0	Bacteria	Armatimonadota	uncultured	uncultured	uncultured	uncultured	uncultured_bacterium
b6ccef5f7edaa722f1bf8d7c6cc4c3bb	0	1	2	3	2	14	0	1	1	7	7	8	Bacteria	Planctomycetota	Phycisphaerae	Tepidisphaerales	WD2101_soil_group	WD2101_soil_group	unidentified
2a3dacbffe24a5c3fa65cda90a819236	0	0	26	0	0	0	20	0	0	0	0	0	Bacteria	Actinobacteriota	Actinobacteria	Propionibacteriales	Nocardioidaceae	Kribbella	unidentified
2de023344d1e1391e2dacc4af7f0d21c	0	0	25	0	0	0	0	21	0	0	0	0	Bacteria	Actinobacteriota	Actinobacteria	Micromonosporales	Micromonosporaceae	unidentified	unidentified
d051fa87a35b0551a7868cb9f4801655	0	0	21	0	0	0	0	25	0	0	0	0	Bacteria	Proteobacteria	Alphaproteobacteria	Rhizobiales	Xanthobacteraceae	uncultured	unidentified
d0c1290fe9be1697b0b654e5c63b2921	0	0	16	0	0	16	0	0	0	0	14	0	Bacteria	Gemmatimonadota	Gemmatimonadetes	Gemmatimonadales	Gemmatimonadaceae	Gemmatimonas	unidentified
6a6b7338ffdb46a9dfc527dd17752664	0	0	13	0	0	0	19	0	0	14	0	0	Bacteria	Actinobacteriota	Actinobacteria	Micromonosporales	Micromonosporaceae	unidentified	unidentified
133c1f6f4b1572108c590162b47f2fa9	0	0	11	0	0	0	0	0	0	19	16	0	Bacteria	Actinobacteriota	Actinobacteria	Frankiales	Geodermatophilaceae	Blastococcus	unidentified
1bbd4026c243d000f39d3ff717a55fcf	0	0	7	9	0	0	0	0	14	0	16	0	Bacteria	Armatimonadota	uncultured	uncultured	uncultured	uncultured	uncultured_bacterium
0144bb1cc51c4630defa5748d09e99a9	0	0	6	13	0	8	0	11	8	0	0	0	Bacteria	Acidobacteriota	Subgroup_5	Subgroup_5	Subgroup_5	Subgroup_5	unidentified
e6256b5fef21ad3e7069baa9a4b20fe2	0	0	6	0	0	0	11	11	2	7	9	0	Bacteria	Actinobacteriota	Actinobacteria	Micromonosporales	Micromonosporaceae	unidentified	unidentified
ad18bd522fa9279be12106f61b151c82	0	0	0	0	37	9	0	0	0	0	0	0	Bacteria	Bacteroidota	Bacteroidia	Flavobacteriales	Flavobacteriaceae	Flavobacterium	unidentified
7748b610f060ae5b3f01ba59ad0fa119	0	0	0	0	0	22	0	0	0	24	0	0	Bacteria	Actinobacteriota	Actinobacteria	Micromonosporales	Micromonosporaceae	Salinispora	Catellatospora_sp.
bc2adb776914ddb3b80fdd544b571cbf	0	0	0	0	0	0	0	0	18	15	13	0	Bacteria	Actinobacteriota	Actinobacteria	Micromonosporales	Micromonosporaceae	unidentified	unidentified
0f068167b9313dce1363db739816fa1f	0	0	0	0	0	0	0	0	8	38	0	0	Bacteria	Actinobacteriota	Actinobacteria	Pseudonocardiales	Pseudonocardiaceae	Lechevalieria	unidentified
2897788eca59ff0f72a881575a25ee94	34	0	0	0	0	11	0	0	0	0	0	0	Bacteria	Patescibacteria	Saccharimonadia	Saccharimonadales	Saccharimonadales	Saccharimonadales	uncultured_soil
7e5196446bcad4de1fd84d9a14172892	14	0	0	0	18	0	0	0	0	0	0	13	Bacteria	Cyanobacteria	Cyanobacteriia	Chloroplast	Chloroplast	Chloroplast	unidentified
777e1742c999a1d54e5241c9a19ce9e5	7	0	0	0	9	12	0	10	0	7	0	0	Bacteria	Armatimonadota	uncultured	uncultured	uncultured	uncultured	uncultured_bacterium
65e9df1215c596e1fea06b64eaf04781	0	9	0	0	11	0	8	9	0	4	0	4	Bacteria	Cyanobacteria	Cyanobacteriia	Chloroplast	Chloroplast	Chloroplast	Oscillatoriales_cyanobacterium
25b4c80cb61752304e81ca533f3ec2f2	0	0	21	0	0	0	0	0	0	24	0	0	Bacteria	Proteobacteria	Alphaproteobacteria	Rhodobacterales	Rhodobacteraceae	Amaricoccus	uncultured_bacterium
e8d3418a917543c3608bf8996f58eee9	0	0	15	0	0	0	6	24	0	0	0	0	Bacteria	Bacteroidota	Bacteroidia	Flavobacteriales	Flavobacteriaceae	Flavobacterium	Flavobacterium_fluminis
e9513b4e37af5eee7a2e54c0636a3f72	0	0	11	0	0	13	11	0	0	0	0	10	Bacteria	Chloroflexi	KD4-96	KD4-96	KD4-96	KD4-96	unidentified
3bbbb51f3a4a4ef2bbf78ea1c92c1e24	0	0	9	0	6	0	0	15	9	6	0	0	Bacteria	Actinobacteriota	Actinobacteria	Frankiales	uncultured	uncultured	metagenome
18bafac4ab94141b7382abb89007d725	0	0	3	0	25	0	17	0	0	0	0	0	Bacteria	Acidobacteriota	Holophagae	Subgroup_7	Subgroup_7	Subgroup_7	uncultured_Acidobacteria
d7e7d84ab53a45f62ea491cad771124a	0	0	0	16	0	15	0	13	1	0	0	0	Bacteria	Gemmatimonadota	Gemmatimonadetes	Gemmatimonadales	Gemmatimonadaceae	uncultured	unidentified
34102f8b1b78da96f68d160a963e21f1	0	0	0	16	8	0	12	0	0	0	9	0	Bacteria	Proteobacteria	Alphaproteobacteria	Elsterales	uncultured	uncultured	uncultured_bacterium
f7bc90c81b92fe75eec9ff1ef9fae9de	0	0	0	6	0	11	0	5	0	15	8	0	Bacteria	Acidobacteriota	Blastocatellia	Blastocatellales	Blastocatellaceae	unidentified	unidentified
4a115de176ad8bee5f6bbeac532b8453	0	0	0	1	14	0	0	0	2	8	0	20	Bacteria	Firmicutes	Clostridia	Clostridiales	Clostridiaceae	Clostridium_sensu_stricto_13	uncultured_bacterium
f2e52ed95317cebcc5d6cec83d6227f7	0	0	0	0	25	0	0	0	0	20	0	0	Bacteria	Chloroflexi	Gitt-GS-136	Gitt-GS-136	Gitt-GS-136	Gitt-GS-136	uncultured_bacterium
f2fd2313845710e517c21f542584805e	0	0	0	0	13	0	0	9	0	10	13	0	Bacteria	Chloroflexi	KD4-96	KD4-96	KD4-96	KD4-96	unidentified
e2c56c974616d1d64ec433e7db242a07	0	0	0	0	0	9	7	0	7	7	9	6	Bacteria	Chloroflexi	Chloroflexia	Thermomicrobiales	Thermomicrobiaceae	Nitrolancea	uncultured_bacterium
bd519171e42310c1fb6b19f1c23f76a3	0	0	0	0	0	0	25	0	0	20	0	0	Bacteria	Cyanobacteria	Cyanobacteriia	Cyanobacteriales	Phormidiaceae	Tychonema_CCAP_1459-11B	unidentified
cd8e30b6cba59d1ca03a533454f1242f	14	0	20	10	0	0	0	0	0	0	0	0	Bacteria	Actinobacteriota	Acidimicrobiia	Microtrichales	Iamiaceae	Iamia	uncultured_bacterium
2ca099ae1803e307d317976129e7b774	14	0	0	0	14	0	0	0	6	10	0	0	Bacteria	Gemmatimonadota	Gemmatimonadetes	Gemmatimonadales	Gemmatimonadaceae	Gemmatimonas	unidentified
4f633a02ddbbc24eacc074eae3f811d8	13	5	5	8	0	6	0	0	0	0	0	7	Bacteria	Actinobacteriota	Actinobacteria	Propionibacteriales	Nocardioidaceae	Nocardioides	unidentified
b468774ae999ac188faadfd198d8c3e5	10	6	15	0	0	13	0	0	0	0	0	0	Bacteria	Planctomycetota	Phycisphaerae	Tepidisphaerales	WD2101_soil_group	WD2101_soil_group	unidentified
71ccbaf905ce6cbbac20c368f829c998	5	0	7	0	5	5	0	0	0	6	7	9	Bacteria	Actinobacteriota	Acidimicrobiia	Microtrichales	Ilumatobacteraceae	uncultured	metagenome
a0e10fa52611a80bfa581477b6042418	0	16	28	0	0	0	0	0	0	0	0	0	Bacteria	Proteobacteria	Alphaproteobacteria	Sphingomonadales	Sphingomonadaceae	Altererythrobacter	unidentified
2fd920be8573bfa7fba5a4021d9c4801	0	0	17	27	0	0	0	0	0	0	0	0	Bacteria	Actinobacteriota	Actinobacteria	Frankiales	Geodermatophilaceae	Blastococcus	unidentified
85d50f79ba3174e2ef8d5411cbff28fc	0	0	9	7	0	0	6	0	7	4	0	11	Bacteria	Actinobacteriota	Actinobacteria	Frankiales	Sporichthyaceae	uncultured	uncultured_bacterium
6a280e3f0ca29be7b8b8c0e82e998a1b	0	0	0	8	8	14	9	0	0	0	0	5	Bacteria	Bacteroidota	Bacteroidia	Cytophagales	Cytophagaceae	Rhodocytophaga	unidentified
bba1b6acd273af11acea49aea3a85a10	0	0	0	6	0	14	1	0	5	10	8	0	Bacteria	Actinobacteriota	Actinobacteria	Frankiales	Sporichthyaceae	uncultured	uncultured_bacterium
9b034aaeb3a42de42bf3c149f33b959c	0	0	0	2	9	0	10	0	6	7	6	4	Bacteria	Proteobacteria	Alphaproteobacteria	Rickettsiales	Mitochondria	Mitochondria	uncultured_bacterium
10e6d74fdcca89cb15d459959d109815	0	0	0	0	0	16	0	0	19	9	0	0	Bacteria	Actinobacteriota	Actinobacteria	Micromonosporales	Micromonosporaceae	Actinoplanes	unidentified
85bd3b496dcab2f31533fe38500baac4	0	0	0	0	0	0	25	19	0	0	0	0	Bacteria	Actinobacteriota	Actinobacteria	Propionibacteriales	Nocardioidaceae	Nocardioides	unidentified
7dc496741cd95bcc739d7666f79f6efb	25	0	0	18	0	0	0	0	0	0	0	0	Bacteria	Chloroflexi	Ktedonobacteria	C0119	C0119	C0119	uncultured_bacterium
b1a8dfe5b92434ef1e65f8e49a6aebf3	11	0	0	0	0	0	0	0	19	0	0	13	Bacteria	Gemmatimonadota	Gemmatimonadetes	Gemmatimonadales	Gemmatimonadaceae	uncultured	unidentified
481817479ad13a8cf6b9eba93c42f068	0	16	1	1	1	1	0	19	0	0	2	2	Bacteria	Gemmatimonadota	Gemmatimonadetes	Gemmatimonadales	Gemmatimonadaceae	uncultured	unidentified
5c07671254a3435853ec306c5ae2e5c6	0	6	0	0	9	0	5	0	8	5	10	0	Bacteria	Actinobacteriota	Actinobacteria	Micromonosporales	Micromonosporaceae	unidentified	unidentified
fede09e03365cc22ee9b75ad98bf13b9	0	5	0	7	11	0	8	5	0	0	0	7	Bacteria	Actinobacteriota	Actinobacteria	Micrococcales	Intrasporangiaceae	unidentified	unidentified
067f109c6e272ee8c3b87c2fe03695cc	0	0	0	14	0	0	0	14	0	0	15	0	Bacteria	Actinobacteriota	Acidimicrobiia	IMCC26256	IMCC26256	IMCC26256	unidentified
2a901f4e2d9ef546f129571ab7286fd9	0	0	0	0	0	19	24	0	0	0	0	0	Bacteria	Actinobacteriota	Actinobacteria	Propionibacteriales	Nocardioidaceae	Nocardioides	Nocardioides_terrigena
398f2551456e8894954e62742b0a0f5f	0	0	0	0	0	12	11	6	0	0	0	14	Bacteria	Gemmatimonadota	Gemmatimonadetes	Gemmatimonadales	Gemmatimonadaceae	Gemmatimonas	unidentified
a7b87c5048400ea11b86a9a6c4f54e7c	23	0	0	0	0	0	19	0	0	0	0	0	Bacteria	Actinobacteriota	Actinobacteria	Micromonosporales	Micromonosporaceae	Actinoplanes	unidentified
b2af3bd1c2ec3650b28d372431f65b52	11	0	0	0	0	0	0	6	12	0	0	13	Bacteria	Planctomycetota	Planctomycetes	Pirellulales	Pirellulaceae	Pirellula	unidentified
7d6f532bc547a50b840fcc3adbdd6756	3	0	2	4	6	3	4	2	4	2	10	2	Bacteria	Chloroflexi	Anaerolineae	Anaerolineales	Anaerolineaceae	UTCFX1	uncultured_bacterium
e0ab28be2405cf8585f47be2a709f33f	0	6	8	17	11	0	0	0	0	0	0	0	Bacteria	Chloroflexi	KD4-96	KD4-96	KD4-96	KD4-96	uncultured_Chloroflexi
aca2145416d86e15b014668dd63a3ffb	0	0	12	11	0	0	0	0	19	0	0	0	Bacteria	Actinobacteriota	Actinobacteria	Micrococcales	Microbacteriaceae	Microbacterium	unidentified
df48727525a4ee875540bc83f28d3476	0	0	11	0	10	5	10	0	0	0	6	0	Bacteria	Chloroflexi	Ktedonobacteria	C0119	C0119	C0119	uncultured_bacterium
8cf39fe2e88ede10d57edbc8e2bf42df	0	0	1	14	0	8	0	0	0	6	9	4	Bacteria	Chloroflexi	Ktedonobacteria	C0119	C0119	C0119	uncultured_bacterium
4e71d696fea527a6d0471f93e1b65d61	0	0	0	23	0	0	0	0	19	0	0	0	Bacteria	Actinobacteriota	Acidimicrobiia	Microtrichales	Iamiaceae	Iamia	metagenome
e9a4a087ae6d8daabcd2651cb8fa9bb0	0	0	0	18	12	12	0	0	0	0	0	0	Bacteria	Bacteroidota	Bacteroidia	Sphingobacteriales	NS11-12_marine_group	NS11-12_marine_group	uncultured_Bacteroidetes
3d86cdca6a56ba6249cfa161397c2c2c	0	0	0	0	0	25	0	0	9	8	0	0	Bacteria	Abditibacteriota	Abditibacteria	Abditibacteriales	Abditibacteriaceae	Abditibacterium	uncultured_bacterium
4fa7083d40988b6695a376af9ff007c2	27	0	0	0	0	14	0	0	0	0	0	0	Bacteria	Acidobacteriota	Holophagae	Subgroup_7	Subgroup_7	Subgroup_7	uncultured_soil
09935cff8af173d371b48136dec112ac	16	1	0	14	0	0	0	9	0	0	0	1	Bacteria	Proteobacteria	Alphaproteobacteria	Rhizobiales	Beijerinckiaceae	Microvirga	Microvirga_subterranea
a66a464ae19d19a419b9d40c4df1c318	11	0	0	0	12	0	0	0	0	0	5	13	Bacteria	Firmicutes	Clostridia	Clostridiales	Clostridiaceae	unidentified	unidentified
e468f8f2806f8d515109a2a12051c585	11	0	0	0	6	0	17	0	7	0	0	0	Bacteria	Chloroflexi	KD4-96	KD4-96	KD4-96	KD4-96	unidentified
2a6efddfd201b0ad89303a1bed4252d7	10	0	0	0	0	0	17	14	0	0	0	0	Bacteria	Actinobacteriota	Actinobacteria	Pseudonocardiales	Pseudonocardiaceae	Actinomycetospora	unidentified
0d7ab287b288dba650342e840f480c4c	6	0	0	0	5	0	12	0	8	0	0	10	Bacteria	Planctomycetota	Phycisphaerae	Tepidisphaerales	WD2101_soil_group	WD2101_soil_group	unidentified
0a65104d92ec1133afbfe309b38bc3bd	0	19	9	0	0	0	13	0	0	0	0	0	Bacteria	Bacteroidota	Bacteroidia	Flavobacteriales	Flavobacteriaceae	Flavobacterium	unidentified
a6abfac7563bf25d01f8070b45f08638	0	10	0	9	0	0	8	0	0	14	0	0	Bacteria	Proteobacteria	Alphaproteobacteria	Rhizobiales	Devosiaceae	Devosia	unidentified
799cf1e9ef589dfc6ba6592689a54592	0	0	0	13	0	0	0	0	0	12	0	16	Bacteria	Proteobacteria	Alphaproteobacteria	Rickettsiales	Mitochondria	Mitochondria	unidentified
bff6504340e35a1d99d12243dfd93f69	0	0	0	6	0	0	0	0	0	19	0	16	Bacteria	Bacteroidota	Bacteroidia	Cytophagales	Spirosomaceae	Dyadobacter	unidentified
e506276dc8c39719ef7d60eb2c31d6e1	0	0	0	0	0	0	23	0	0	0	0	18	Bacteria	Actinobacteriota	Actinobacteria	Micromonosporales	Micromonosporaceae	Actinoplanes	unidentified
8f3a77a768ef5bed4bee54f4c814e1f7	0	0	0	0	0	0	17	0	0	0	0	24	Bacteria	Actinobacteriota	Acidimicrobiia	uncultured	uncultured	uncultured	uncultured_Iamia
b5585ae23698690661beb9f82742f861	26	0	3	0	0	0	0	0	0	7	0	4	Bacteria	Proteobacteria	Alphaproteobacteria	Rhizobiales	Devosiaceae	Devosia	unidentified
ba1aba26d50db4c23f098d403e78ce2c	8	6	3	7	2	0	1	2	7	0	2	2	Bacteria	Bacteroidota	Bacteroidia	Flavobacteriales	Flavobacteriaceae	Flavobacterium	metagenome
ec2cdb0b505bd053dd57add86aec173e	2	0	8	0	0	5	10	0	4	0	1	10	Bacteria	Gemmatimonadota	Gemmatimonadetes	Gemmatimonadales	Gemmatimonadaceae	uncultured	unidentified
298b4a4ba64068fcaecf0c43ea1b9d21	0	18	0	0	0	8	0	0	0	0	0	14	Bacteria	Bacteroidota	Bacteroidia	Flavobacteriales	Flavobacteriaceae	Flavobacterium	unidentified
2a9cb578e77ab0874a34fe2c6ea8dd0e	0	0	27	13	0	0	0	0	0	0	0	0	Bacteria	Bacteroidota	Bacteroidia	Flavobacteriales	Flavobacteriaceae	Flavobacterium	unidentified
9a15cbfb1dc875c90d63b02d066432b8	0	0	0	15	0	9	0	0	16	0	0	0	Bacteria	Bacteroidota	Bacteroidia	Flavobacteriales	Flavobacteriaceae	Flavobacterium	Flexibacter_aurantiacus
971fed6ce78bbd0704163ba19d4f7d58	0	0	0	14	9	0	0	0	0	0	17	0	Bacteria	Actinobacteriota	Actinobacteria	Micrococcales	Microbacteriaceae	unidentified	unidentified
c2e6fcc844ac7502742263f94599bcc5	0	0	0	12	0	0	15	13	0	0	0	0	Bacteria	Actinobacteriota	Acidimicrobiia	Microtrichales	Ilumatobacteraceae	Ilumatobacter	uncultured_bacterium
842dc6c15edef164e5c45cab6e32bd58	0	0	0	8	0	0	15	0	0	0	17	0	Bacteria	Actinobacteriota	Actinobacteria	Micrococcales	Cellulomonadaceae	Cellulomonas	unidentified
d97ed6f7fc5f72980fff9a17a691978f	0	0	0	0	26	0	0	0	0	14	0	0	Bacteria	Bacteroidota	Bacteroidia	Flavobacteriales	Flavobacteriaceae	Flavobacterium	unidentified
72590c19cdc9509e033ed1ffdc830261	0	0	0	0	11	0	16	13	0	0	0	0	Bacteria	Chloroflexi	Chloroflexia	Thermomicrobiales	AKYG1722	AKYG1722	uncultured_soil
289d41b394658f83fabbc64c39fa8d35	0	0	0	0	0	0	17	23	0	0	0	0	Bacteria	Gemmatimonadota	Gemmatimonadetes	Gemmatimonadales	Gemmatimonadaceae	Gemmatimonas	Gemmatimonadaceae_bacterium
36894e2fcd67e4842dfa540cccbdbad7	8	0	0	0	0	0	0	0	0	0	8	23	Bacteria	Bacteroidota	Bacteroidia	Flavobacteriales	Flavobacteriaceae	Flavobacterium	unidentified
ddc61777f807e146ace1a104794c5dd6	0	5	0	7	4	0	11	6	6	0	0	0	Bacteria	Actinobacteriota	Acidimicrobiia	Microtrichales	Ilumatobacteraceae	uncultured	uncultured_soil
7238eec3538a2d5418d96bce95e43be6	0	0	17	0	0	6	0	0	0	0	0	16	Bacteria	Chloroflexi	KD4-96	KD4-96	KD4-96	KD4-96	metagenome
9561f79cb4b4abd1b52f2374580e6804	0	0	16	15	0	0	0	8	0	0	0	0	Bacteria	Cyanobacteria	Cyanobacteriia	Cyanobacteriales	Nostocaceae	unidentified	unidentified
efc27fbbe9b0845fd815275712c028f0	0	0	14	0	0	16	0	0	0	0	9	0	Bacteria	Gemmatimonadota	Gemmatimonadetes	Gemmatimonadales	Gemmatimonadaceae	Gemmatimonas	uncultured_bacterium
1684b055b427774e697ea5992d1a42e6	0	0	13	0	12	0	0	0	0	6	0	8	Bacteria	Proteobacteria	Alphaproteobacteria	Elsterales	uncultured	uncultured	uncultured_bacterium
af3ba6783bbb3afec0774862ad1a759e	0	0	9	11	0	0	0	19	0	0	0	0	Bacteria	Chloroflexi	Chloroflexia	Thermomicrobiales	JG30-KF-CM45	JG30-KF-CM45	unidentified
446132aeabf923afbfbb8a7dd416350f	0	0	0	0	11	0	0	0	0	0	0	28	Bacteria	Proteobacteria	Alphaproteobacteria	Elsterales	uncultured	uncultured	unidentified
963487da862baed70badaaab2351ed04	0	0	0	0	0	11	0	0	13	15	0	0	Bacteria	Chloroflexi	Anaerolineae	Caldilineales	Caldilineaceae	Litorilinea	unidentified
9e8fffa9f85b74264d566bf48b45d59b	0	0	0	0	0	0	11	0	0	0	0	28	Bacteria	Actinobacteriota	Actinobacteria	Micrococcales	Microbacteriaceae	Microbacterium	unidentified
92ca215eb014637618b3fb6c3eaffc9b	0	0	0	0	0	0	6	8	0	7	0	18	Bacteria	Actinobacteriota	Actinobacteria	Frankiales	uncultured	uncultured	unidentified
3e1cb26b0a54e4be57b3e962afb99d97	24	0	14	0	0	0	0	0	0	0	0	0	Bacteria	Proteobacteria	Alphaproteobacteria	Rhizobiales	Rhizobiales_Incertae_Sedis	uncultured	uncultured_bacterium
a7c0da7963e88ba1e7c32d7cb3647888	16	0	0	0	0	0	0	0	22	0	0	0	Bacteria	Gemmatimonadota	Gemmatimonadetes	Gemmatimonadales	Gemmatimonadaceae	uncultured	unidentified
cbc451520ff3c23328fa9133a25ca2e4	14	24	0	0	0	0	0	0	0	0	0	0	Bacteria	Actinobacteriota	Actinobacteria	Micrococcales	Microbacteriaceae	unidentified	unidentified
2539a270a4185d93d6c7becccbada5ba	13	0	0	1	0	0	0	13	0	0	11	0	Bacteria	Actinobacteriota	Actinobacteria	unidentified	unidentified	unidentified	unidentified
28e88830563962a3209f55cfc16ff370	8	0	11	0	0	0	0	0	0	0	10	9	Bacteria	Planctomycetota	Phycisphaerae	Tepidisphaerales	WD2101_soil_group	WD2101_soil_group	unidentified
db70aab15c8e65278d023f8435b32085	0	0	0	11	0	0	0	10	0	17	0	0	Bacteria	WS2	WS2	WS2	WS2	WS2	uncultured_soil
c2586767b18d23a97cb2cfe4f29a10de	0	0	0	0	0	0	0	14	11	13	0	0	Bacteria	Acidobacteriota	Subgroup_11	Subgroup_11	Subgroup_11	Subgroup_11	uncultured_bacterium
9b315d436c04f32740b238bbf45f6c28	0	0	0	0	0	0	0	0	20	0	0	18	Bacteria	Proteobacteria	Alphaproteobacteria	Rhizobiales	Xanthobacteraceae	uncultured	unidentified
81458a0b8a6add9ab3c53cbda326adc7	20	0	0	0	0	0	0	0	17	0	0	0	Bacteria	Actinobacteriota	Actinobacteria	Propionibacteriales	Nocardioidaceae	Nocardioides	unidentified
16b9737d422fe173f35009d6a08e5e18	8	0	8	0	3	0	0	5	6	7	0	0	Bacteria	Actinobacteriota	Acidimicrobiia	Microtrichales	Ilumatobacteraceae	uncultured	unidentified
be370bc3343ddeb89563772d1db7dcbb	5	7	14	0	0	0	0	11	0	0	0	0	Bacteria	Chloroflexi	Ktedonobacteria	C0119	C0119	C0119	uncultured_bacterium
2ac1669b649c9adc49c1f05169195460	3	0	0	0	5	0	0	1	6	3	12	7	Bacteria	Actinobacteriota	Actinobacteria	Micrococcales	Microbacteriaceae	Microbacterium	Microbacterium_hatanonis
ac90c3b0c60bfa564f15341023ff3fb3	0	10	0	16	11	0	0	0	0	0	0	0	Bacteria	Proteobacteria	Alphaproteobacteria	Rhodobacterales	Rhodobacteraceae	Amaricoccus	unidentified
b119bd1a61d76f6df3c0bc05428f3524	0	9	0	12	0	0	0	16	0	0	0	0	Bacteria	Proteobacteria	Alphaproteobacteria	Rhizobiales	uncultured	uncultured	uncultured_Alphaproteobacteria
3b5ea85f851615ebfa51cbf70b4a6fda	0	6	0	0	0	17	0	0	14	0	0	0	Bacteria	Gemmatimonadota	Gemmatimonadetes	Gemmatimonadales	Gemmatimonadaceae	unidentified	unidentified
7d58debe9100b5d8eaffe4f46fc6d89d	0	0	23	13	0	1	0	0	0	0	0	0	Bacteria	Actinobacteriota	Actinobacteria	Micrococcales	Microbacteriaceae	Agromyces	unidentified
f3f6d2cc48dbbbd7af7902aea5db00be	0	0	23	0	0	0	0	14	0	0	0	0	Bacteria	Chloroflexi	OLB14	OLB14	OLB14	OLB14	uncultured_bacterium
5332b78f3c1a9b5a616dcac9dc8c135c	0	0	19	0	0	0	18	0	0	0	0	0	Bacteria	Actinobacteriota	Acidimicrobiia	uncultured	uncultured	uncultured	uncultured_Acidimicrobiia
dfd66b701cdfcfc8e4172e704e9e8489	0	0	8	14	0	0	0	15	0	0	0	0	Bacteria	Chloroflexi	Chloroflexia	Thermomicrobiales	JG30-KF-CM45	JG30-KF-CM45	unidentified
515915500dcdc671def1ba968deda564	0	0	0	0	11	0	0	11	0	15	0	0	Bacteria	Acidobacteriota	Acidobacteriae	Acidobacteriae	Acidobacteriae	Paludibaculum	uncultured_bacterium
9c28becff5f9a57d3612e78eb72e4cb0	0	0	0	0	8	13	5	0	0	0	5	6	Bacteria	Chloroflexi	Ktedonobacteria	C0119	C0119	C0119	uncultured_Chloroflexi
2d533c617795ebcb9366fa68c07c8c6d	0	0	0	0	0	0	5	5	11	16	0	0	Bacteria	Planctomycetota	Phycisphaerae	Tepidisphaerales	Tepidisphaeraceae	Tepidisphaeraceae	uncultured_bacterium
e6148f4ef816939a1fbb6d579888cc4c	22	0	14	0	0	0	0	0	0	0	0	0	Bacteria	Armatimonadota	uncultured	uncultured	uncultured	uncultured	uncultured_bacterium
937b487933621b3cad2513e00544db08	3	2	3	7	3	4	2	0	2	1	5	4	Bacteria	Chloroflexi	Chloroflexia	Chloroflexales	Roseiflexaceae	uncultured	uncultured_bacterium
ddad0ae1bd0d9c629ced38a93a103112	3	0	4	3	0	0	5	6	2	5	4	4	Bacteria	Gemmatimonadota	Gemmatimonadetes	Gemmatimonadales	Gemmatimonadaceae	Gemmatimonas	unidentified
62ec0f1f66793308fee7c4b986345ecc	0	13	0	0	0	0	0	11	0	12	0	0	Bacteria	Proteobacteria	Alphaproteobacteria	Acetobacterales	Acetobacteraceae	unidentified	unidentified
bf2b7186f435784f16ee593286e68ca1	0	10	13	0	0	0	13	0	0	0	0	0	Bacteria	Actinobacteriota	Actinobacteria	Propionibacteriales	Nocardioidaceae	Marmoricola	unidentified
2aceb8831ee921562d1c2b35ce7bf7c4	0	0	0	20	16	0	0	0	0	0	0	0	Bacteria	Proteobacteria	Alphaproteobacteria	Sphingomonadales	Sphingomonadaceae	Altererythrobacter	unidentified
16529fe85779aa092ca3f853fca9a934	0	0	0	0	0	24	0	0	0	0	12	0	Bacteria	Planctomycetota	Planctomycetes	Isosphaerales	Isosphaeraceae	uncultured	Singulisphaera_sp.
8a178c0320e85705d791e2b0467d3a88	0	0	0	0	0	10	15	0	4	0	7	0	Bacteria	Chloroflexi	Chloroflexia	Thermomicrobiales	JG30-KF-CM45	JG30-KF-CM45	unidentified
716f2732d963f27d504ffac10da2a3ff	0	0	0	0	0	9	11	0	0	0	0	16	Bacteria	Firmicutes	Clostridia	Clostridiales	Clostridiaceae	Clostridium_sensu_stricto_5	uncultured_bacterium
f7cb140b966b6814c29c1aae93e14815	0	0	0	0	0	8	0	0	28	0	0	0	Bacteria	Proteobacteria	Alphaproteobacteria	Caulobacterales	Caulobacteraceae	Asticcacaulis	Asticcacaulis_benevestitus
acd262f41e91700272a784c392d9449e	0	0	0	0	0	0	0	15	0	8	0	13	Bacteria	Proteobacteria	Alphaproteobacteria	Rhizobiales	Rhizobiales_Incertae_Sedis	Nordella	uncultured_Hyphomicrobiaceae
4de0dfe76b9052f8757f1fb276605a17	26	0	0	0	9	0	0	0	0	0	0	0	Bacteria	Patescibacteria	Saccharimonadia	Saccharimonadales	Saccharimonadales	Saccharimonadales	unidentified
41668080b3d56faa1c6eb40910467619	16	0	0	0	0	0	0	0	19	0	0	0	Bacteria	Actinobacteriota	Acidimicrobiia	IMCC26256	IMCC26256	IMCC26256	uncultured_Acidimicrobiia
f46567865d5d081d5e6df4e0cad6d5a5	9	0	11	0	0	0	0	0	0	0	15	0	Bacteria	Gemmatimonadota	Gemmatimonadetes	Gemmatimonadales	Gemmatimonadaceae	unidentified	unidentified
9038b19f41f943bf519b9944930c8caa	9	0	0	7	13	0	0	1	5	0	0	0	Bacteria	Gemmatimonadota	Gemmatimonadetes	Gemmatimonadales	Gemmatimonadaceae	unidentified	unidentified
08f3c73dadcd45863a6a6722359e4db2	7	6	0	0	0	0	0	8	0	6	0	8	Bacteria	Chloroflexi	Chloroflexia	Thermomicrobiales	AKYG1722	AKYG1722	unidentified
ab392f6a25cf88f33c41666681b70e55	7	11	0	0	0	6	0	0	0	0	0	11	Bacteria	Proteobacteria	Gammaproteobacteria	Pseudomonadales	Moraxellaceae	uncultured	metagenome
5818675983428b716c44b79882e14960	0	6	0	0	6	0	6	0	8	9	0	0	Bacteria	Planctomycetota	Phycisphaerae	Tepidisphaerales	WD2101_soil_group	WD2101_soil_group	uncultured_bacterium
985596dd5f07af3bcabeb9b5c54081f4	0	0	26	0	9	0	0	0	0	0	0	0	Bacteria	Actinobacteriota	Actinobacteria	Micrococcales	Intrasporangiaceae	Ornithinibacter	uncultured_bacterium
5fd8eb1cd5389bd10c664629a9ec6502	0	0	17	0	0	0	0	0	18	0	0	0	Bacteria	Planctomycetota	Phycisphaerae	Tepidisphaerales	WD2101_soil_group	WD2101_soil_group	unidentified
63a1b6914d964db530d36db6d0df4982	0	0	13	0	0	0	0	0	22	0	0	0	Bacteria	Actinobacteriota	Actinobacteria	Propionibacteriales	Nocardioidaceae	Nocardioides	Nocardioides_albus
a557044696c2335990592c5b0a5156c8	0	0	12	0	0	0	0	13	10	0	0	0	Bacteria	Proteobacteria	Alphaproteobacteria	Rhizobiales	Rhizobiaceae	Ensifer	unidentified
c95cdd0683c42b5bab9229eb205aa7ff	0	0	12	0	0	0	0	0	23	0	0	0	Bacteria	Proteobacteria	Alphaproteobacteria	Rhizobiales	Devosiaceae	Devosia	unidentified
32423c2c4fdd5a90f31d3026fc42e08c	0	0	8	0	7	0	7	6	7	0	0	0	Bacteria	Actinobacteriota	Actinobacteria	Micromonosporales	Micromonosporaceae	Luedemannella	uncultured_bacterium
59faed1bb0390a2272c0c1b75699fdaa	0	0	0	10	0	0	0	0	14	0	0	11	Bacteria	Actinobacteriota	Actinobacteria	Micrococcales	Intrasporangiaceae	unidentified	unidentified
47f707b0f01b7c85ac0b79c31370f7c5	0	0	0	0	16	0	19	0	0	0	0	0	Bacteria	Bacteroidota	Bacteroidia	Flavobacteriales	Flavobacteriaceae	Flavobacterium	unidentified
1f8a43d680ca7fd0eac145ad5dcabd30	0	0	0	0	15	0	0	0	20	0	0	0	Bacteria	Proteobacteria	Alphaproteobacteria	Rhizobiales	Rhizobiaceae	Allorhizobium-Neorhizobium-Pararhizobium-Rhizobium	unidentified
ef1f2e9ed3baf7868d457a8861eb9756	0	0	0	0	1	0	14	0	20	0	0	0	Bacteria	Gemmatimonadota	Gemmatimonadetes	Gemmatimonadales	Gemmatimonadaceae	uncultured	uncultured_proteobacterium
6465c387cf5f7252aae35a7f6626d223	0	0	0	0	0	14	0	0	16	5	0	0	Bacteria	Chloroflexi	TK10	TK10	TK10	TK10	uncultured_bacterium
8ea752515d8a83cea8d4e4276ed0e602	0	0	0	0	0	8	11	0	0	0	16	0	Bacteria	Chloroflexi	Anaerolineae	RBG-13-54-9	RBG-13-54-9	RBG-13-54-9	uncultured_eubacterium
bba483c6af215794d16f448aab07dcee	0	0	0	0	0	0	21	0	14	0	0	0	Bacteria	Chloroflexi	Anaerolineae	RBG-13-54-9	RBG-13-54-9	RBG-13-54-9	uncultured_sludge
e5c45b956ca5389e5bc069ed30958cdf	0	0	0	0	0	0	8	0	0	0	14	13	Bacteria	Proteobacteria	Alphaproteobacteria	Rhizobiales	Rhizobiaceae	Allorhizobium-Neorhizobium-Pararhizobium-Rhizobium	unidentified
877db6911eab8ccfece162d37ff76375	18	3	0	0	0	0	0	0	5	0	0	8	Bacteria	Patescibacteria	Parcubacteria	Parcubacteria	Parcubacteria	Parcubacteria	uncultured_bacterium
3819f265a6b5371594067ddd9b23bf4c	8	0	0	8	0	0	0	0	8	0	0	10	Bacteria	Chloroflexi	Anaerolineae	SBR1031	SBR1031	SBR1031	uncultured_bacterium
fe8c0551954b4a08aeb8c027f75c9e72	0	21	0	0	0	0	0	0	0	13	0	0	Bacteria	Proteobacteria	Alphaproteobacteria	Caulobacterales	Caulobacteraceae	Phenylobacterium	unidentified
e0d2303f75e1d49c46b1e53171fe43c8	0	0	13	0	0	0	0	9	0	12	0	0	Bacteria	Proteobacteria	Alphaproteobacteria	Rhizobiales	Beijerinckiaceae	Microvirga	unidentified
7ff55d05d31e819e610016ab4982e465	0	0	5	0	0	0	10	0	9	0	0	10	Bacteria	Planctomycetota	Planctomycetes	Pirellulales	Pirellulaceae	Pirellula	uncultured_soil
fcf6c71c2372a7e9f51dca2150400ba3	0	0	0	10	10	7	0	0	0	0	7	0	Bacteria	Acidobacteriota	Acidobacteriae	Bryobacterales	Bryobacteraceae	Bryobacter	unidentified
de1c596969f75f38ef9b4c8428f5e878	0	0	0	8	0	8	5	0	0	0	8	5	Bacteria	Planctomycetota	Pla4_lineage	Pla4_lineage	Pla4_lineage	Pla4_lineage	uncultured_bacterium
4c8a7a5cf83dc89f7f5a986d863347fc	0	0	0	7	6	0	0	10	5	0	0	6	Bacteria	Planctomycetota	Phycisphaerae	Phycisphaerales	Phycisphaeraceae	SM1A02	uncultured_soil
15325b885dc4d8d9d21b3eaa6485006a	0	0	0	0	8	0	8	9	9	0	0	0	Bacteria	Proteobacteria	Alphaproteobacteria	uncultured	uncultured	uncultured	unidentified
a42f3b810e29dd66fd825b34a3c2569c	0	0	0	0	0	15	0	0	0	0	0	19	Bacteria	Chloroflexi	Ktedonobacteria	C0119	C0119	C0119	uncultured_bacterium
c10c22183b24d5b6c0f015925f2e4d86	0	0	0	0	0	6	7	0	6	5	7	3	Bacteria	Acidobacteriota	Subgroup_20	Subgroup_20	Subgroup_20	Subgroup_20	uncultured_bacterium
3a6e5a91b8867bd71cfe339b025b29f2	0	0	0	0	0	0	10	0	0	24	0	0	Bacteria	Actinobacteriota	Actinobacteria	Micromonosporales	Micromonosporaceae	Actinoplanes	unidentified
113cf062a524482b18ecde16b5c345b9	0	0	0	0	0	0	0	0	0	25	9	0	Bacteria	Actinobacteriota	Actinobacteria	Micrococcales	Microbacteriaceae	Microbacterium	unidentified
76627d26ed529a7ec441637e6a52fd32	18	0	0	0	0	0	5	0	0	0	0	10	Bacteria	Bacteroidota	Bacteroidia	Cytophagales	Hymenobacteraceae	Adhaeribacter	unidentified
5c55ee1551679f9961ffbaa45173b7f9	17	0	0	0	0	16	0	0	0	0	0	0	Bacteria	Planctomycetota	Planctomycetes	Pirellulales	Pirellulaceae	Pirellula	agricultural_soil
7fcbae640f13231bb4b5e967c7771187	1	2	2	4	4	0	3	2	5	4	2	4	Bacteria	Proteobacteria	Alphaproteobacteria	Rhizobiales	Xanthobacteraceae	uncultured	unidentified
50277bf8435a87514138fb888db676de	0	12	0	0	13	0	0	0	0	8	0	0	Bacteria	Actinobacteriota	Acidimicrobiia	Microtrichales	Iamiaceae	Iamia	uncultured_bacterium
afeea9439e15354de10ec4b07e8d41e4	0	5	25	0	0	0	0	0	3	0	0	0	Bacteria	Chloroflexi	Anaerolineae	RBG-13-54-9	RBG-13-54-9	RBG-13-54-9	uncultured_sludge
615383150d855a6002cd3d0caf1fd954	0	0	14	0	0	0	0	0	10	0	9	0	Bacteria	Planctomycetota	Phycisphaerae	Tepidisphaerales	WD2101_soil_group	WD2101_soil_group	uncultured_bacterium
5f3577b6b71ccac41d69a0012f439efb	0	0	8	0	0	11	0	7	0	0	0	7	Bacteria	Bacteroidota	Bacteroidia	Chitinophagales	Saprospiraceae	uncultured	uncultured_Haliscomenobacter
8656e85a76654eb4c7080c78460f6eb3	0	0	8	0	0	0	0	0	0	11	14	0	Bacteria	Acidobacteriota	Subgroup_5	Subgroup_5	Subgroup_5	Subgroup_5	uncultured_bacterium
5f1b0cf45772d78cdfd51ec7409f4521	0	0	4	0	0	5	7	0	0	0	11	6	Bacteria	Gemmatimonadota	Gemmatimonadetes	Gemmatimonadales	Gemmatimonadaceae	Gemmatimonas	unidentified
115f0effb3164996e9f9b5c799c05f7f	0	0	0	12	0	0	21	0	0	0	0	0	Bacteria	Chloroflexi	Chloroflexia	Chloroflexales	Roseiflexaceae	uncultured	uncultured_bacterium
799fd19f86a568704d4a9a5e9141babd	0	0	0	9	0	0	8	0	0	4	0	12	Bacteria	Armatimonadota	uncultured	uncultured	uncultured	uncultured	uncultured_bacterium
52ee81972344c5ffe31f45ab3865e3bb	0	0	0	0	0	11	0	13	0	1	8	0	Bacteria	Proteobacteria	Alphaproteobacteria	Rhizobiales	Xanthobacteraceae	uncultured	unidentified
7825b9eff621111bc051b91225159396	0	0	0	0	0	9	0	15	9	0	0	0	Bacteria	Bacteroidota	Bacteroidia	Cytophagales	Hymenobacteraceae	Adhaeribacter	unidentified
b936950a6d1001e1c88a26a22ff0f3a1	0	0	0	0	0	0	0	18	15	0	0	0	Bacteria	Proteobacteria	Alphaproteobacteria	Caulobacterales	Caulobacteraceae	Phenylobacterium	unidentified
0deb4cee7d647be44b39e52807d41064	0	0	0	0	0	0	0	0	0	16	17	0	Bacteria	Patescibacteria	Saccharimonadia	Saccharimonadales	S32	TM7	uncultured_Candidatus
4e06ca0d6529ea0a69e37ae20f0e50fe	11	0	0	0	0	0	0	0	14	7	0	0	Bacteria	Armatimonadota	uncultured	uncultured	uncultured	uncultured	uncultured_bacterium
6a9bf8214a609b59bd856620b3202af3	11	0	0	0	0	0	9	3	0	9	0	0	Bacteria	Actinobacteriota	Actinobacteria	Corynebacteriales	Nocardiaceae	Williamsia	unidentified
1380f7fdafd0124c4e114c38c2e42e20	5	0	0	0	7	5	0	5	5	0	0	5	Bacteria	Actinobacteriota	Acidimicrobiia	uncultured	uncultured	uncultured	uncultured_soil
d64faf5057d7ed46c45013765abbc107	0	15	2	0	2	0	1	1	11	0	0	0	Bacteria	Bacteroidota	Bacteroidia	Flavobacteriales	Flavobacteriaceae	Flavobacterium	uncultured_soil
15dd938c9de626c0649c4c191cce2a70	0	8	0	0	0	0	0	0	0	13	11	0	Bacteria	Proteobacteria	Alphaproteobacteria	Rhizobiales	Xanthobacteraceae	unidentified	unidentified
22d1f4c308d0bb8ebdd7d28fdf549214	0	6	0	5	9	5	7	0	0	0	0	0	Bacteria	Bacteroidota	Bacteroidia	Cytophagales	Hymenobacteraceae	Adhaeribacter	unidentified
c169c9b2857e3ccb570cb750bb379df5	0	0	19	0	0	0	0	0	9	0	4	0	Bacteria	Actinobacteriota	Actinobacteria	Frankiales	Sporichthyaceae	uncultured	uncultured_bacterium
187364360df6fcbd261cc237a8c20ee2	0	0	14	0	0	0	0	0	0	0	0	18	Bacteria	Actinobacteriota	Actinobacteria	Propionibacteriales	Nocardioidaceae	Nocardioides	Nocardioides_pelophilus
de24adaac29c3fe4078bf30a5ff4409d	0	0	1	0	0	9	12	0	1	9	0	0	Bacteria	Acidobacteriota	Subgroup_11	Subgroup_11	Subgroup_11	Subgroup_11	uncultured_bacterium
f323faf9ba8f7e3b04bee970e1890e7b	0	0	0	17	0	0	0	15	0	0	0	0	Bacteria	Bacteroidota	Bacteroidia	Cytophagales	Hymenobacteraceae	Adhaeribacter	metagenome
94e5c3653b18210d92d3346e99352902	0	0	0	17	0	15	0	0	0	0	0	0	Bacteria	Proteobacteria	Alphaproteobacteria	Azospirillales	Azospirillaceae	Skermanella	unidentified
8fbf483e6936932a462df63924e733f9	0	0	0	12	0	0	0	0	20	0	0	0	Bacteria	Actinobacteriota	Actinobacteria	Streptomycetales	Streptomycetaceae	Streptomyces	unidentified
b5eac6dc33d87abe8f8ad6ba63b622b9	0	0	0	9	15	1	0	0	0	0	0	7	Bacteria	Chloroflexi	TK10	TK10	TK10	TK10	unidentified
ceb8b3c056db77c26e4969c0711969db	0	0	0	9	0	0	0	0	11	12	0	0	Bacteria	Planctomycetota	Phycisphaerae	Phycisphaerales	Phycisphaeraceae	uncultured	metagenome
44fe02102bc0ef4455a4a4201cb3e31e	0	0	0	6	13	0	0	0	9	0	4	0	Bacteria	Chloroflexi	Chloroflexia	Chloroflexales	Chloroflexaceae	FFCH7168	uncultured_bacterium
d0ec6c3d29b18d586308856155dba007	0	0	0	0	15	0	6	0	3	8	0	0	Bacteria	Proteobacteria	Alphaproteobacteria	Sphingomonadales	Sphingomonadaceae	Sphingomonas	unidentified
08651f5247c9c5ab4d99eef5402a91f5	0	0	0	0	12	0	0	0	0	9	11	0	Bacteria	Proteobacteria	Alphaproteobacteria	Rhizobiales	Xanthobacteraceae	unidentified	unidentified
cc13a6728852a086411e3fc24f32f015	0	0	0	0	0	23	9	0	0	0	0	0	Bacteria	Actinobacteriota	Actinobacteria	Micrococcales	Demequinaceae	Demequina	uncultured_bacterium
4d79cd312e38facd5490442e793eb309	0	0	0	0	0	0	0	0	18	0	0	14	Bacteria	Proteobacteria	Alphaproteobacteria	Rhizobiales	Hyphomicrobiaceae	Hyphomicrobium	unidentified
8fa1f9c8cafa4080b7fa3ddaeb1fe79e	5	6	0	0	0	0	8	3	9	0	0	0	Bacteria	Actinobacteriota	Actinobacteria	Frankiales	Frankiales	Frankiales	uncultured_bacterium
7dc104ebd6e114c3bad1d7fb504c8c1c	0	14	0	0	0	0	0	17	0	0	0	0	Bacteria	Abditibacteriota	Abditibacteria	Abditibacteriales	Abditibacteriaceae	Abditibacterium	uncultured_bacterium
9fabd4394f0fe6a04283738dd03384e8	0	11	0	0	0	8	0	12	0	0	0	0	Bacteria	Actinobacteriota	Actinobacteria	Frankiales	Frankiales	Frankiales	uncultured_bacterium
a232f2ee37a9a20b05c9a2192f1242a9	0	8	23	0	0	0	0	0	0	0	0	0	Bacteria	Proteobacteria	Alphaproteobacteria	Rhizobiales	Devosiaceae	Devosia	unidentified
15faaf501a1c8fcf2474ddbe76719465	0	6	0	0	7	0	0	0	0	0	11	7	Bacteria	Bacteroidota	Bacteroidia	Cytophagales	Hymenobacteraceae	Hymenobacter	unidentified
b900040d3ec3bfd79a96555cf269a5e3	0	3	0	0	6	0	0	0	22	0	0	0	Bacteria	Bacteroidota	Kapabacteria	Kapabacteriales	Kapabacteriales	Kapabacteriales	uncultured_bacterium
32a15c0367066124ea3d1fcd613e8887	0	2	1	3	3	13	1	1	0	2	0	5	Bacteria	Acidobacteriota	Subgroup_5	Subgroup_5	Subgroup_5	Subgroup_5	uncultured_bacterium
549e11631a33898eba48b058703af4e9	0	0	16	0	0	15	0	0	0	0	0	0	Bacteria	Chloroflexi	Anaerolineae	SBR1031	A4b	A4b	wastewater_metagenome
464d9ac8eb7acb84d860d60aafe4ec03	0	0	9	0	0	0	13	0	9	0	0	0	Bacteria	Chloroflexi	Anaerolineae	SBR1031	SBR1031	SBR1031	metagenome
fb9a5f21b2cd76bce6d09e40bff70985	0	0	9	0	0	0	0	0	13	0	0	9	Bacteria	Proteobacteria	Alphaproteobacteria	Rhizobiales	Xanthobacteraceae	unidentified	unidentified
152dd63bf6c5037b3b448f3bfdac99a4	0	0	0	12	0	19	0	0	0	0	0	0	Bacteria	Actinobacteriota	Actinobacteria	Propionibacteriales	Nocardioidaceae	Nocardioides	unidentified
29666aa014f905297f38bf539c111128	0	0	0	11	0	0	0	0	0	0	20	0	Bacteria	Actinobacteriota	unidentified	unidentified	unidentified	unidentified	unidentified
d98788ead606ef771d029f5a22f97bb4	0	0	0	9	0	0	13	0	9	0	0	0	Bacteria	Gemmatimonadota	Gemmatimonadetes	Gemmatimonadales	Gemmatimonadaceae	uncultured	unidentified
e7fba46d1f77a460016a287567b8eefb	0	0	0	8	7	10	0	0	0	0	0	6	Bacteria	Chloroflexi	Chloroflexia	Thermomicrobiales	JG30-KF-CM45	JG30-KF-CM45	unidentified
a51978c6c835f0db50072bb54e597137	0	0	0	0	16	0	0	15	0	0	0	0	Bacteria	Firmicutes	Clostridia	Peptostreptococcales-Tissierellales	Peptostreptococcaceae	Sporacetigenium	Sporacetigenium_mesophilum
806e5c9e6a3fb7f6693cd9e769336de1	0	0	0	0	14	0	0	0	17	0	0	0	Bacteria	Acidobacteriota	Blastocatellia	Blastocatellales	Blastocatellaceae	unidentified	unidentified
9f28bdee6709882d84ef9dd97b613ccc	0	0	0	0	0	0	12	0	0	19	0	0	Bacteria	Gemmatimonadota	Gemmatimonadetes	Gemmatimonadales	Gemmatimonadaceae	Gemmatimonas	unidentified
32d74a3996056f7d0a9625216c125220	0	0	0	0	0	0	0	0	13	18	0	0	Bacteria	Proteobacteria	Alphaproteobacteria	Rhizobiales	Xanthobacteraceae	uncultured	unidentified
8b8141a38c84678cfcb588bad5620ca7	8	0	0	4	9	0	0	0	0	9	0	0	Bacteria	Planctomycetota	Phycisphaerae	Tepidisphaerales	WD2101_soil_group	WD2101_soil_group	unidentified
530c40bf3dc9fc4f0c45413448ada9c9	7	0	0	0	9	0	7	0	0	0	7	0	Bacteria	Gemmatimonadota	Gemmatimonadetes	Gemmatimonadales	Gemmatimonadaceae	uncultured	uncultured_Gemmatimonadetes
c2ccf538ad8efa486de04e80fd4d60db	5	0	6	0	0	0	10	0	0	9	0	0	Bacteria	Armatimonadota	uncultured	uncultured	uncultured	uncultured	uncultured_bacterium
64bc958453bfb667369f7922641579a4	0	8	0	8	0	14	0	0	0	0	0	0	Bacteria	Actinobacteriota	Actinobacteria	Propionibacteriales	Nocardioidaceae	Nocardioides	unidentified
7330f7961a31a3410f28ed43cde2fb00	0	0	17	0	13	0	0	0	0	0	0	0	Bacteria	Acidobacteriota	Acidobacteriae	Bryobacterales	Bryobacteraceae	Bryobacter	unidentified
a555209992221233024ec9b41a4e626b	0	0	17	0	0	6	0	0	7	0	0	0	Bacteria	Proteobacteria	Alphaproteobacteria	Rhizobiales	Devosiaceae	uncultured	unidentified
c3818f05f02206bbec2bd7be0d89d9d2	0	0	15	0	0	0	0	0	0	0	0	15	Bacteria	Acidobacteriota	Blastocatellia	Blastocatellales	Blastocatellaceae	JGI_0001001-H03	unidentified
8955f28a2d27619cec37b36f7273eb17	0	0	10	9	0	0	0	0	11	0	0	0	Bacteria	Planctomycetota	Planctomycetes	uncultured	uncultured	uncultured	uncultured_bacterium
d4976942c97a84c9fb7ab53b594e4a6b	0	0	5	0	16	0	9	0	0	0	0	0	Bacteria	Proteobacteria	Alphaproteobacteria	Rickettsiales	Mitochondria	Mitochondria	unidentified
932c0d9800c59c61cc1502f2935d2538	0	0	0	10	11	0	0	0	0	9	0	0	Bacteria	Proteobacteria	Alphaproteobacteria	Rhizobiales	Xanthobacteraceae	Rhodoplanes	uncultured_Rhodoplanes
eaa290175644f35580eca4c63f2a3858	0	0	0	0	15	15	0	0	0	0	0	0	Bacteria	Actinobacteriota	Acidimicrobiia	Microtrichales	Ilumatobacteraceae	CL500-29_marine_group	metagenome
b9c5e31472e56775795dd7b4814f77b6	0	0	0	0	0	7	0	0	10	0	0	13	Bacteria	Proteobacteria	Alphaproteobacteria	Rhizobiales	Rhizobiales_Incertae_Sedis	uncultured	uncultured_bacterium
3c8ee814acdc3cb0babf89989ad29738	16	0	0	0	7	0	0	0	0	6	0	0	Bacteria	Proteobacteria	Alphaproteobacteria	Rhizobiales	Rhodomicrobiaceae	Rhodomicrobium	uncultured_bacterium
daa419639fa4c00b495385f7910d1a5f	7	0	0	0	0	0	16	0	6	0	0	0	Bacteria	Chloroflexi	Chloroflexia	Thermomicrobiales	JG30-KF-CM45	JG30-KF-CM45	uncultured_bacterium
a756964fe801bf5307d1186a15eecf45	0	17	0	0	0	12	0	0	0	0	0	0	Bacteria	Proteobacteria	Alphaproteobacteria	Rhizobiales	Rhizobiaceae	Allorhizobium-Neorhizobium-Pararhizobium-Rhizobium	unidentified
0b7c748393ad9600683f1c5e8b8fd5f1	0	6	0	0	0	0	0	0	0	23	0	0	Bacteria	Bacteroidota	Bacteroidia	Cytophagales	Cytophagaceae	Rhodocytophaga	uncultured_bacterium
c2ee255dcc064d11adc8e8cc0764d99c	0	0	9	0	5	0	0	0	6	0	9	0	Bacteria	Actinobacteriota	Acidimicrobiia	Microtrichales	Ilumatobacteraceae	Ilumatobacter	uncultured_Actinomycetales
922bf8692dd4d266df248c0fe4dfc143	0	0	9	0	0	0	0	0	0	14	0	6	Bacteria	Bacteroidota	Bacteroidia	Chitinophagales	Saprospiraceae	uncultured	uncultured_Devosia
ecb5c3f8f6633d3eb084eb2d64af0fd8	0	0	6	4	0	0	8	0	11	0	0	0	Bacteria	Actinobacteriota	Actinobacteria	Frankiales	Nakamurellaceae	Nakamurella	unidentified
da782fb25e86f3b311433b32be971991	0	0	4	9	0	0	0	0	0	7	9	0	Bacteria	Actinobacteriota	Actinobacteria	Frankiales	Nakamurellaceae	Nakamurella	unidentified
da5eefb99c85f3edf28ff28d99603de0	0	0	0	8	4	0	5	0	12	0	0	0	Bacteria	Chloroflexi	Chloroflexia	Thermomicrobiales	JG30-KF-CM45	JG30-KF-CM45	uncultured_bacterium
094e79429573b7de835b130c15a0db17	0	0	0	7	8	0	0	14	0	0	0	0	Bacteria	Actinobacteriota	Coriobacteriia	OPB41	OPB41	OPB41	metagenome
271ca28b4503804c0f3835352c9e1003	0	0	0	0	18	0	0	0	0	11	0	0	Bacteria	Proteobacteria	Alphaproteobacteria	Rhizobiales	Rhodomicrobiaceae	Rhodomicrobium	uncultured_bacterium
fede65c0cf96c5bab919ad0eede2e27c	0	0	0	0	0	9	0	0	20	0	0	0	Bacteria	Firmicutes	Bacilli	Erysipelotrichales	Erysipelotrichaceae	Turicibacter	unidentified
707add4f5c6159a2c97720dffd16a7dc	0	0	0	0	0	1	10	18	0	0	0	0	Bacteria	Actinobacteriota	Actinobacteria	Propionibacteriales	Nocardioidaceae	Nocardioides	unidentified
1fde2ad20a41b1fd218ce4014a020916	10	0	0	0	0	0	0	0	18	0	0	0	Bacteria	Chloroflexi	TK10	TK10	TK10	TK10	bacterium_Ellin6519
887a6fe0e1b8f74b801111ba1654e405	9	0	0	0	0	0	0	7	0	0	12	0	Bacteria	Bacteroidota	Bacteroidia	Chitinophagales	Saprospiraceae	uncultured	uncultured_Devosia
fc67e5ba0ac664941e01e3945db082d6	7	0	0	11	0	10	0	0	0	0	0	0	Bacteria	Actinobacteriota	Actinobacteria	Propionibacteriales	Nocardioidaceae	Nocardioides	unidentified
1c7baac1c82a60ee091d18fca1803ef8	6	0	0	5	0	0	10	0	7	0	0	0	Bacteria	Entotheonellaeota	Entotheonellia	Entotheonellales	Entotheonellaceae	Candidatus_Entotheonella	unidentified
18497863ac48d2fefc13450405c4f053	3	0	0	0	0	4	6	0	7	0	8	0	Bacteria	Chloroflexi	Anaerolineae	Anaerolineae	Anaerolineae	Anaerolineae	uncultured_Bellilinea
5ae15d8fefb970bce2a289d64e8660c9	1	0	1	0	0	4	2	2	5	5	6	2	Bacteria	Actinobacteriota	Acidimicrobiia	IMCC26256	IMCC26256	IMCC26256	uncultured_Acidimicrobiia
5669b5f04dfb97ed80e78eb391c2fc95	1	6	0	0	4	0	9	0	1	0	6	1	Bacteria	Gemmatimonadota	Gemmatimonadetes	Gemmatimonadales	Gemmatimonadaceae	Gemmatimonas	uncultured_bacterium
a562e00de0a32811ce695e11fb0ee513	0	18	0	0	0	0	10	0	0	0	0	0	Bacteria	Proteobacteria	Alphaproteobacteria	Rhizobiales	Devosiaceae	uncultured	unidentified
77f4d103bce5ab3f62907a0dc348ecc2	0	8	5	0	0	0	0	0	0	0	7	8	Bacteria	Actinobacteriota	Actinobacteria	Pseudonocardiales	Pseudonocardiaceae	Actinophytocola	unidentified
27e23074cac2555d626e4520791fa1e5	0	8	0	0	0	0	9	0	0	0	11	0	Bacteria	Acidobacteriota	Blastocatellia	Blastocatellales	Blastocatellaceae	Blastocatella	uncultured_bacterium
20edccca7c3e5384d1aa589537227bfe	0	8	0	0	0	0	0	10	0	10	0	0	Bacteria	Chloroflexi	TK10	TK10	TK10	TK10	unidentified
7532479f1bca2d6f7391223c8d05f57a	0	6	0	0	0	14	0	8	0	0	0	0	Bacteria	Planctomycetota	Phycisphaerae	Tepidisphaerales	WD2101_soil_group	WD2101_soil_group	unidentified
cf22f8a83396603a9af1d64a5c886271	0	1	0	0	0	8	0	0	6	0	0	13	Bacteria	Proteobacteria	Alphaproteobacteria	Acetobacterales	Acetobacteraceae	Roseomonas	unidentified
8be4efd5dd2ed81c05ad5223afbebba6	0	0	17	0	0	0	0	0	0	11	0	0	Bacteria	Bacteroidota	Bacteroidia	Flavobacteriales	Flavobacteriaceae	Flavobacterium	unidentified
44684d920900f9ef910a1b7bd8bdc9d3	0	0	12	0	0	0	9	0	7	0	0	0	Bacteria	Chloroflexi	Anaerolineae	Caldilineales	Caldilineaceae	uncultured	unidentified
bfc5a6471219fd32524d8a72518e0027	0	0	10	0	0	5	0	0	13	0	0	0	Bacteria	Chloroflexi	Anaerolineae	SBR1031	A4b	A4b	uncultured_soil
de58c601407573fd3d4740e10d53bb36	0	0	4	0	0	8	6	0	0	0	0	10	Bacteria	Acidobacteriota	Subgroup_5	Subgroup_5	Subgroup_5	Subgroup_5	uncultured_bacterium
9f64ff8aac8c83d9ecec3af9fcf1c8c6	0	0	0	17	0	0	0	0	0	0	11	0	Bacteria	Firmicutes	Clostridia	Clostridiales	Clostridiaceae	Clostridium_sensu_stricto_1	unidentified
5222371408bd1f8da515ce9a23c990f2	0	0	0	15	0	0	0	13	0	0	0	0	Bacteria	Chloroflexi	KD4-96	KD4-96	KD4-96	KD4-96	unidentified
9fcfd7191012df74e95fdebb319b0d15	0	0	0	0	10	5	0	2	11	0	0	0	Bacteria	Actinobacteriota	Actinobacteria	Propionibacteriales	Propionibacteriaceae	Micropruina	unidentified
f518cd65f36877a6344b292f1645128f	0	0	0	0	6	3	0	0	0	19	0	0	Bacteria	Actinobacteriota	Actinobacteria	Streptomycetales	Streptomycetaceae	Streptomyces	unidentified
187bedb352e962eb8491deee81daa806	0	0	0	0	0	21	7	0	0	0	0	0	Bacteria	Proteobacteria	Alphaproteobacteria	Acetobacterales	Acetobacteraceae	unidentified	unidentified
a6e5acce51df22bc382c87a294a84286	0	0	0	0	0	9	0	19	0	0	0	0	Bacteria	Fibrobacterota	Fibrobacteria	Fibrobacterales	Fibrobacteraceae	possible_genus_04	unidentified
f3ecc0f4a628d7298c68c15879d45971	12	0	0	15	0	0	0	0	0	0	0	0	Bacteria	Patescibacteria	Saccharimonadia	Saccharimonadales	Saccharimonadales	Saccharimonadales	unidentified
ecd797809bc6e8faffa7969b1f97b966	9	0	0	18	0	0	0	0	0	0	0	0	Bacteria	Proteobacteria	Alphaproteobacteria	Rhizobiales	Xanthobacteraceae	uncultured	unidentified
d226c6e10c5a93916f32d2e9608539f7	6	0	5	0	0	0	5	0	0	6	0	5	Bacteria	Planctomycetota	Phycisphaerae	Tepidisphaerales	WD2101_soil_group	WD2101_soil_group	uncultured_bacterium
264b724a1577b24990216a4958b02645	3	0	3	3	2	6	0	0	3	3	4	0	Bacteria	Gemmatimonadota	Gemmatimonadetes	Gemmatimonadales	Gemmatimonadaceae	uncultured	unidentified
a4c2b9a24df1677792259819334f31af	0	6	0	0	9	0	0	0	8	0	4	0	Bacteria	Bacteroidota	Bacteroidia	Chitinophagales	Saprospiraceae	uncultured	unidentified
c0380ce4a709b72ea8c7a06c9d646ce9	0	0	9	0	6	0	0	0	0	0	0	12	Bacteria	Chloroflexi	Chloroflexia	Chloroflexales	Roseiflexaceae	uncultured	uncultured_bacterium
de9c4d90657aa04b7aebbc6623350cfd	0	0	0	0	15	12	0	0	0	0	0	0	Bacteria	Actinobacteriota	Acidimicrobiia	Microtrichales	Ilumatobacteraceae	CL500-29_marine_group	metagenome
23570901757306449a8e163b7fc4b3bf	0	0	0	0	12	0	0	0	6	0	0	9	Bacteria	Actinobacteriota	Actinobacteria	Micrococcales	Microbacteriaceae	Cryobacterium	Cryobacterium_arcticum
10bdea627f537effcede5c4427709dcc	0	0	0	0	11	0	0	0	8	0	0	8	Bacteria	Proteobacteria	Alphaproteobacteria	Sphingomonadales	Sphingomonadaceae	Novosphingobium	unidentified
4398ed6a1b78240de4ef0ed2cee0141a	0	0	0	0	10	8	0	9	0	0	0	0	Bacteria	Patescibacteria	Saccharimonadia	Saccharimonadales	S32	TM7	uncultured_bacterium
f087cce7cad5ade184cde6776b933130	0	0	0	0	0	13	0	0	0	14	0	0	Bacteria	Proteobacteria	Alphaproteobacteria	Rickettsiales	Mitochondria	Mitochondria	uncultured_bacterium
03cc36b958dcb42fd0335d60e4bb3c91	0	0	0	0	0	13	0	0	0	0	0	14	Bacteria	Actinobacteriota	Thermoleophilia	Gaiellales	uncultured	uncultured	metagenome
7f7dd48e0ab22f006e7650b18d544582	0	0	0	0	0	12	15	0	0	0	0	0	Bacteria	Proteobacteria	Alphaproteobacteria	Rhizobiales	uncultured	uncultured	metagenome
fc993401cf23b9b6ad20fc4017973560	0	0	0	0	0	0	0	13	0	14	0	0	Bacteria	Actinobacteriota	Acidimicrobiia	uncultured	uncultured	uncultured	uncultured_Acidimicrobiia
a3b80ab3a1dc5c43ae50328858eca168	0	0	0	0	0	0	0	0	0	15	12	0	Bacteria	Proteobacteria	Alphaproteobacteria	Rhizobiales	Beijerinckiaceae	Bosea	unidentified
2e110be120b62eab8482e4d465cde8aa	15	11	0	0	0	0	0	0	0	0	0	0	Bacteria	Acidobacteriota	Subgroup_11	Subgroup_11	Subgroup_11	Subgroup_11	uncultured_bacterium
dec46d0865f3823c645d1fae72873df5	6	0	0	6	4	0	0	0	10	0	0	0	Bacteria	Chloroflexi	Anaerolineae	SBR1031	SBR1031	SBR1031	uncultured_soil
e8b8abcb42e7b2544683dd4f2a99a0db	5	0	0	4	0	5	0	5	7	0	0	0	Bacteria	Armatimonadota	Chthonomonadetes	Chthonomonadales	Chthonomonadaceae	Chthonomonas	uncultured_bacterium
53ef28cc962b9d5f0c63f897b2d22f7b	4	5	5	5	0	0	4	1	0	0	2	0	Bacteria	Bacteroidota	Bacteroidia	Chitinophagales	Saprospiraceae	uncultured	uncultured_soil
d513fc2ab9555de114b348ec903aa8ea	4	0	0	2	4	3	6	0	0	0	7	0	Bacteria	Bacteroidota	Bacteroidia	Chitinophagales	Saprospiraceae	uncultured	unidentified
33f46d7839e7ad161a419753ebb009e8	0	17	6	0	0	0	0	0	0	0	3	0	Bacteria	Proteobacteria	Alphaproteobacteria	Rhodobacterales	Rhodobacteraceae	Rhodobacter	unidentified
83f628a6e89e904f09ab45cc245152c6	0	12	0	0	0	7	7	0	0	0	0	0	Bacteria	Armatimonadota	Armatimonadia	Armatimonadales	Armatimonadales	Armatimonadales	unidentified
f36121e5d6134b7f8c8de2a96d7c5e2f	0	9	0	0	0	0	7	9	1	0	0	0	Bacteria	Bacteroidota	Bacteroidia	Flavobacteriales	Flavobacteriaceae	Flavobacterium	unidentified
3b7471a2e993acaa311d245cd6d17ebd	0	7	5	0	10	0	0	0	0	0	4	0	Bacteria	Cyanobacteria	Cyanobacteriia	Chloroplast	Chloroplast	Chloroplast	unidentified
be282acf9b8579363488a50fe0562319	0	0	16	0	0	0	0	0	0	0	10	0	Bacteria	Proteobacteria	Alphaproteobacteria	Sphingomonadales	Sphingomonadaceae	Novosphingobium	unidentified
f5b3921b58b0abf640ad802fa83b143e	0	0	2	0	5	0	7	0	8	0	0	4	Bacteria	Chloroflexi	Chloroflexia	Thermomicrobiales	JG30-KF-CM45	JG30-KF-CM45	uncultured_bacterium
69bc4a8674aacea0f1a70ded12cfde65	0	0	0	14	0	0	12	0	0	0	0	0	Bacteria	Actinobacteriota	Actinobacteria	Corynebacteriales	Mycobacteriaceae	Mycobacterium	unidentified
b3e74c9c31f2ca99d2dab9f20c5dd788	0	0	0	12	0	0	0	0	14	0	0	0	Bacteria	Actinobacteriota	Acidimicrobiia	uncultured	uncultured	uncultured	uncultured_Acidimicrobiia
bceb0ab26bf3e1cae281ce52d4e714ed	0	0	0	5	0	0	13	0	1	0	0	7	Bacteria	Actinobacteriota	Actinobacteria	Propionibacteriales	Nocardioidaceae	Nocardioides	unidentified
e969bf1cba9d72d9ce94a990ea50aa5f	0	0	0	0	5	0	0	12	0	0	9	0	Bacteria	Cyanobacteria	Cyanobacteriia	Chloroplast	Chloroplast	Chloroplast	unidentified
e6af444439358ac7b78bd5981d98e38d	0	0	0	0	5	4	0	0	0	0	17	0	Bacteria	Actinobacteriota	Actinobacteria	Corynebacteriales	Mycobacteriaceae	Mycobacterium	unidentified
bd323abaa8c0feedb18da7135d0cfac0	0	0	0	0	0	0	5	9	0	0	7	5	Bacteria	Proteobacteria	Alphaproteobacteria	Rhizobiales	Beijerinckiaceae	Microvirga	metagenome
102f47f195811bc56813ba4811adc498	0	0	0	0	0	0	0	0	10	0	16	0	Bacteria	Proteobacteria	Alphaproteobacteria	Rhodobacterales	Rhodobacteraceae	Rhodobacter	unidentified
a1682f6421326a7af977277178760449	0	0	0	0	0	0	0	0	0	16	0	10	Bacteria	Bacteroidota	Bacteroidia	Flavobacteriales	Flavobacteriaceae	Flavobacterium	Flavobacterium_fluvii
4dbf24fc528963ddd6c0d39ba91dabd3	13	0	0	0	0	12	0	0	0	0	0	0	Bacteria	Proteobacteria	Alphaproteobacteria	Rhodobacterales	Rhodobacteraceae	Amaricoccus	unidentified
74d9999a4db52db13bc906dec33cedbe	11	0	14	0	0	0	0	0	0	0	0	0	Bacteria	Actinobacteriota	Actinobacteria	Micromonosporales	Micromonosporaceae	Actinoplanes	unidentified
066d69f80c33a39229041f966afebc2d	10	0	15	0	0	0	0	0	0	0	0	0	Bacteria	Proteobacteria	Alphaproteobacteria	Sphingomonadales	Sphingomonadaceae	Sphingomonas	unidentified
3c933277b73b1ecbaa6d617986486539	9	0	0	6	0	0	0	0	9	0	0	1	Bacteria	Acidobacteriota	Subgroup_5	Subgroup_5	Subgroup_5	Subgroup_5	uncultured_bacterium
17ed986bec1afce97f584e090d8a8225	8	0	0	0	0	10	0	0	7	0	0	0	Bacteria	Planctomycetota	Phycisphaerae	Tepidisphaerales	WD2101_soil_group	WD2101_soil_group	unidentified
ff2df6d5e4498fd35563139be2cb62d2	8	0	0	7	10	0	0	0	0	0	0	0	Bacteria	Acidobacteriota	Holophagae	Subgroup_7	Subgroup_7	Subgroup_7	unidentified
bec30d907ab0e5f9b01e168e5e3d9b5b	3	0	0	0	0	0	8	0	0	10	0	4	Bacteria	Planctomycetota	OM190	OM190	OM190	OM190	unidentified
eece81d8badfed26815ce105e7ed3fee	0	10	0	0	0	0	0	0	0	15	0	0	Bacteria	Chloroflexi	Anaerolineae	SBR1031	A4b	A4b	uncultured_soil
0d3954c2b3a2b4a8e6425f74927fb8eb	0	9	7	0	9	0	0	0	0	0	0	0	Bacteria	Patescibacteria	Saccharimonadia	Saccharimonadales	Saccharimonadaceae	TM7a	uncultured_bacterium
79ae814d6767c06b088dfe15912e5f60	0	8	14	0	0	0	0	0	0	0	0	3	Bacteria	Myxococcota	Polyangia	Nannocystales	Nannocystaceae	Nannocystis	metagenome
291b874a4266c393d3de28b11c60571e	0	0	13	0	0	0	0	0	12	0	0	0	Bacteria	Bacteroidota	Bacteroidia	Flavobacteriales	Flavobacteriaceae	Flavobacterium	unidentified
38c166d47cd19a6c0e6234f43f36b6fd	0	0	11	0	0	0	0	0	14	0	0	0	Bacteria	Myxococcota	Polyangia	Nannocystales	Nannocystaceae	Nannocystis	unidentified
51150b5ec5f999447ee70386e9cac736	0	0	9	6	0	0	0	0	0	10	0	0	Bacteria	Proteobacteria	Alphaproteobacteria	Elsterales	uncultured	uncultured	unidentified
c7050244871030bf32ab2e5da4576e91	0	0	4	0	4	0	3	3	5	0	3	3	Bacteria	Actinobacteriota	Acidimicrobiia	Microtrichales	Ilumatobacteraceae	uncultured	unidentified
05fe8c48f554359fe367778827567d95	0	0	1	0	0	0	14	0	0	0	10	0	Bacteria	Acidobacteriota	Blastocatellia	Blastocatellales	Blastocatellaceae	JGI_0001001-H03	unidentified
c6fe299dda7043d548ce54e5e254ee2b	0	0	0	9	0	0	0	0	0	16	0	0	Bacteria	Chloroflexi	Anaerolineae	SBR1031	SBR1031	SBR1031	uncultured_bacterium
64023a01242e4a4283e96307a99c5e03	0	0	0	8	0	0	0	11	0	0	0	6	Bacteria	Actinobacteriota	Actinobacteria	FFCH16263	FFCH16263	FFCH16263	uncultured_bacterium
4118ebe496428c27faee1ac37d3a16f8	0	0	0	6	0	8	0	3	0	0	0	8	Bacteria	Planctomycetota	Phycisphaerae	Tepidisphaerales	WD2101_soil_group	WD2101_soil_group	uncultured_bacterium
ffcf8095e78f1552ca0613dfa74db51b	0	0	0	0	13	12	0	0	0	0	0	0	Bacteria	Gemmatimonadota	Gemmatimonadetes	Gemmatimonadales	Gemmatimonadaceae	unidentified	unidentified
07112141b386909b521868b260ed5136	0	0	0	0	10	0	0	9	6	0	0	0	Bacteria	Actinobacteriota	Actinobacteria	Propionibacteriales	Nocardioidaceae	Nocardioides	unidentified
9b78934d3a4b04439bb6c5764ffadd22	0	0	0	0	10	0	0	15	0	0	0	0	Bacteria	Actinobacteriota	Actinobacteria	Kineosporiales	Kineosporiaceae	Kineococcus	uncultured_bacterium
e7bc6fdebb89fda7326b2a3ee75dc8fd	0	0	0	0	0	11	7	0	7	0	0	0	Bacteria	Chloroflexi	TK10	TK10	TK10	TK10	unidentified
b6d1d21e9882d0284143eab1caa5056e	0	0	0	0	0	7	10	0	8	0	0	0	Bacteria	Chloroflexi	KD4-96	KD4-96	KD4-96	KD4-96	uncultured_bacterium
f39642145ff29ccf36568af1341bdebe	0	0	0	0	0	0	0	9	0	16	0	0	Bacteria	Bacteroidota	Bacteroidia	Cytophagales	Cyclobacteriaceae	uncultured	unidentified
5b37608dbd370b157c088bdff08d6d37	0	0	0	0	0	0	0	0	13	0	12	0	Bacteria	Bacteroidota	Kapabacteria	Kapabacteriales	Kapabacteriales	Kapabacteriales	uncultured_Chlorobiales
b3424f9a52c7954ad4e14739856d3cd1	14	0	0	0	0	0	0	0	0	0	10	0	Bacteria	Gemmatimonadota	Gemmatimonadetes	Gemmatimonadales	Gemmatimonadaceae	uncultured	unidentified
1ecf3f35296f5fafd525c93df20aad0f	9	0	0	6	0	0	0	0	4	0	0	5	Bacteria	Actinobacteriota	Actinobacteria	Micrococcales	Microbacteriaceae	uncultured	metagenome
30afde680b35075dae6f685679a7ab7c	3	0	0	4	6	3	3	3	0	0	0	2	Bacteria	Proteobacteria	Alphaproteobacteria	Rhodobacterales	Rhodobacteraceae	unidentified	unidentified
5cdc2bf7f6d32db0615a262e544b41ac	0	9	0	0	1	14	0	0	0	0	0	0	Bacteria	Actinobacteriota	Actinobacteria	Corynebacteriales	unidentified	unidentified	unidentified
44eb9243fced5af3f971cf01f1588060	0	8	1	0	0	0	2	0	0	13	0	0	Bacteria	Acidobacteriota	Blastocatellia	Blastocatellales	Blastocatellaceae	unidentified	unidentified
fb44b8ffd3b22452cedc1f33cb12b38f	0	0	14	10	0	0	0	0	0	0	0	0	Bacteria	Actinobacteriota	Actinobacteria	Micromonosporales	Micromonosporaceae	Catellatospora	unidentified
0588624f076913a1d65825214300d5c1	0	0	10	0	0	0	0	0	0	0	14	0	Bacteria	Actinobacteriota	Actinobacteria	Micromonosporales	Micromonosporaceae	unidentified	unidentified
01499aca8d6a5f892c07ffa63f6d61b5	0	0	9	0	0	0	8	0	7	0	0	0	Bacteria	Proteobacteria	Alphaproteobacteria	Rhizobiales	Rhizobiales_Incertae_Sedis	Bauldia	unidentified
2320284d7d04fc6aa8ecc1959a03141f	0	0	0	11	0	0	0	0	0	13	0	0	Bacteria	Chloroflexi	Anaerolineae	SBR1031	SBR1031	SBR1031	uncultured_bacterium
c627732bf1253832929aa5cfccc705e1	0	0	0	10	0	0	0	14	0	0	0	0	Bacteria	Proteobacteria	Alphaproteobacteria	Rhizobiales	uncultured	uncultured	unidentified
578d45866a7cc2aa0053198f171a1808	0	0	0	8	0	0	0	6	10	0	0	0	Bacteria	Actinobacteriota	MB-A2-108	MB-A2-108	MB-A2-108	MB-A2-108	unidentified
8a783479cd19fae10de16f0ff9d3e94d	0	0	0	7	0	0	0	4	0	5	0	8	Bacteria	Proteobacteria	Alphaproteobacteria	Rickettsiales	Mitochondria	Mitochondria	uncultured_bacterium
f43dce4c952de6868af2d5595bd99213	0	0	0	0	14	0	0	10	0	0	0	0	Bacteria	Acidobacteriota	Holophagae	Subgroup_7	Subgroup_7	Subgroup_7	unidentified
5b721bbe13c900509056588297fbb021	0	0	0	0	10	0	0	0	0	0	0	14	Bacteria	Proteobacteria	Alphaproteobacteria	Sphingomonadales	Sphingomonadaceae	Sphingomonas	unidentified
40b654b485a4d4e6ee1f69ec59d63fc5	0	0	0	0	9	0	0	9	0	0	0	6	Bacteria	Actinobacteriota	Actinobacteria	Micrococcales	Microbacteriaceae	Agromyces	unidentified
758236767192766e1f14a331e74f6630	0	0	0	0	8	0	0	16	0	0	0	0	Bacteria	Patescibacteria	Gracilibacteria	Candidatus_Peribacteria	Candidatus_Peribacteria	Candidatus_Peribacteria	uncultured_sludge
3c952bc5f381085e36c9d4a2c324d959	0	0	0	0	7	0	0	0	17	0	0	0	Bacteria	Chloroflexi	TK10	TK10	TK10	TK10	uncultured_bacterium
599c848d7a0db1995cb35c4626fd18f0	0	0	0	0	0	15	0	0	9	0	0	0	Bacteria	Gemmatimonadota	Gemmatimonadetes	Gemmatimonadales	Gemmatimonadaceae	uncultured	uncultured_Gemmatimonadetes
63f1cc556e6ecfb6d84c8cbef8191ced	0	0	0	0	0	0	0	6	18	0	0	0	Bacteria	Chloroflexi	Dehalococcoidia	S085	S085	S085	uncultured_bacterium
8e91fcf18b4d1bd096750a0c77b8ed58	0	0	0	0	0	0	0	0	0	0	10	14	Bacteria	Bacteroidota	Bacteroidia	Flavobacteriales	Flavobacteriaceae	Flavobacterium	unidentified
c9538380e5382e75d94e85c777a5eb53	14	0	0	0	0	0	0	0	0	0	9	0	Bacteria	Acidobacteriota	Subgroup_5	Subgroup_5	Subgroup_5	Subgroup_5	uncultured_Acidobacteria
763bf0f16aab32af647a92a9059ab08d	5	0	0	7	0	0	5	0	0	0	6	0	Bacteria	Firmicutes	Clostridia	Lachnospirales	Lachnospiraceae	Herbinix	Herbinix_luporum
61e2df54ed8ecb64fdcbeb72e9d4c257	1	1	1	3	0	2	8	1	1	0	0	5	Bacteria	Proteobacteria	Alphaproteobacteria	Rhodobacterales	Rhodobacteraceae	unidentified	unidentified
e220bd321c0a33d14d2633b80776da1c	0	5	0	5	4	0	4	2	0	0	3	0	Bacteria	Armatimonadota	Chthonomonadetes	Chthonomonadales	Chthonomonadales	Chthonomonadales	uncultured_bacterium
16826488d33996d032d92aebb087d30b	0	0	12	0	0	0	11	0	0	0	0	0	Bacteria	Actinobacteriota	Actinobacteria	Streptomycetales	Streptomycetaceae	Kitasatospora	unidentified
1e1074310df7aece547827bf432937ca	0	0	12	0	0	11	0	0	0	0	0	0	Bacteria	Acidobacteriota	Acidobacteriae	Acidobacteriales	unidentified	unidentified	unidentified
8bfb2bbc9d727ecae324c0f6a54e93cc	0	0	8	0	0	0	0	0	0	6	9	0	Bacteria	Chloroflexi	JG30-KF-CM66	JG30-KF-CM66	JG30-KF-CM66	JG30-KF-CM66	unidentified
17dea52cfcf760ca36ea4af72f9f11bb	0	0	0	14	0	0	0	0	0	9	0	0	Bacteria	Armatimonadota	uncultured	uncultured	uncultured	uncultured	uncultured_bacterium
c4725560f80d86088ade6174cffec47d	0	0	0	14	0	0	0	9	0	0	0	0	Bacteria	Gemmatimonadota	Gemmatimonadetes	Gemmatimonadales	Gemmatimonadaceae	uncultured	unidentified
1f7eea1f17b7af9db08dda21b13888c4	0	0	0	5	12	0	0	0	0	0	6	0	Bacteria	Actinobacteriota	Actinobacteria	Micrococcales	Microbacteriaceae	Microbacterium	unidentified
7cc4df0e12a9ac9271f88d7241c7dd61	0	0	0	3	0	3	7	0	3	0	3	4	Bacteria	Planctomycetota	Phycisphaerae	Tepidisphaerales	WD2101_soil_group	WD2101_soil_group	unidentified
037ab1ab5d9bf763aac265333f5a7436	0	0	0	0	15	8	0	0	0	0	0	0	Bacteria	Actinobacteriota	Acidimicrobiia	Microtrichales	Ilumatobacteraceae	CL500-29_marine_group	unidentified
1a7ee8f2524de6d3c30cbccd3e049d52	0	0	0	0	12	11	0	0	0	0	0	0	Bacteria	Chloroflexi	KD4-96	KD4-96	KD4-96	KD4-96	uncultured_bacterium
900b7459109f2b82f2a4fdb1dcb751c6	0	0	0	0	10	13	0	0	0	0	0	0	Bacteria	Actinobacteriota	Acidimicrobiia	Microtrichales	Iamiaceae	Iamia	unidentified
7265d2115aea6f441913f28a67989e65	0	0	0	0	10	0	0	0	0	13	0	0	Bacteria	Armatimonadota	uncultured	uncultured	uncultured	uncultured	uncultured_actinobacterium
10e91695bcdff58352a939873ddd13a5	0	0	0	0	0	14	0	0	0	9	0	0	Bacteria	Chloroflexi	Chloroflexia	Kallotenuales	AKIW781	AKIW781	uncultured_bacterium
cb9efe1e02a9d66f7034096b42de0cbb	0	0	0	0	0	6	8	9	0	0	0	0	Bacteria	Bacteroidota	Bacteroidia	Flavobacteriales	Flavobacteriaceae	Flavobacterium	Flavobacterium_fluvii
8e583c3c30c0ed4ee184668b9efdf71c	0	0	0	0	0	3	7	0	0	7	0	6	Bacteria	Chloroflexi	Anaerolineae	Ardenticatenales	uncultured	uncultured	uncultured_prokaryote
306afb325ff119c1ff6441a6228eac70	0	0	0	0	0	0	0	12	0	0	11	0	Bacteria	Actinobacteriota	Acidimicrobiia	IMCC26256	IMCC26256	IMCC26256	uncultured_Ferrimicrobium
f79be9fdaf5374462792d4799446b728	0	0	0	0	0	0	0	0	14	9	0	0	Bacteria	Chloroflexi	TK10	TK10	TK10	TK10	uncultured_bacterium
34234b97095de801f9c81c637c2bd253	0	0	0	0	0	0	0	0	8	6	0	9	Bacteria	Bacteroidota	Bacteroidia	Cytophagales	Hymenobacteraceae	Adhaeribacter	metagenome
4ca367de1f131bcafb2396ad87c5767e	14	0	0	0	8	0	0	0	0	0	0	0	Bacteria	Bacteroidota	Bacteroidia	Flavobacteriales	Flavobacteriaceae	Flavobacterium	unidentified
155afeda6c7fa931bcd07630afdc325b	12	0	0	0	0	0	0	0	10	0	0	0	Bacteria	Actinobacteriota	Actinobacteria	Propionibacteriales	Nocardioidaceae	Marmoricola	unidentified
5586b2c27510989d02c124eba4cfe4d3	9	0	0	13	0	0	0	0	0	0	0	0	Bacteria	Proteobacteria	Alphaproteobacteria	Elsterales	uncultured	uncultured	uncultured_bacterium
5d198e340b5c9855f051f2dfde8380d6	5	0	0	0	0	8	0	0	9	0	0	0	Bacteria	Proteobacteria	Alphaproteobacteria	Tistrellales	Geminicoccaceae	uncultured	uncultured_bacterium
699e2ea54104128cad2985d3b646aea7	0	9	0	0	0	0	0	0	0	0	0	13	Bacteria	Planctomycetota	Phycisphaerae	Phycisphaerales	Phycisphaeraceae	SM1A02	uncultured_prokaryote
e1a1110ab3f34effc64199d3caee6e99	0	8	0	14	0	0	0	0	0	0	0	0	Bacteria	Armatimonadota	Armatimonadia	Armatimonadales	Armatimonadales	Armatimonadales	uncultured_actinobacterium
ef0e102824f1520890544ce1fba8a31d	0	6	0	0	0	3	8	0	0	0	0	5	Bacteria	Gemmatimonadota	Gemmatimonadetes	Gemmatimonadales	Gemmatimonadaceae	Roseisolibacter	metagenome
c6eda990c5a4532e64f6f330545df502	0	1	3	0	0	0	8	10	0	0	0	0	Bacteria	Gemmatimonadota	Gemmatimonadetes	Gemmatimonadales	Gemmatimonadaceae	unidentified	unidentified
8978e4efe88b6eccd80f0f12afba85d2	0	0	12	0	0	0	0	0	0	10	0	0	Bacteria	Proteobacteria	Alphaproteobacteria	Defluviicoccales	Defluviicoccaceae	Defluviicoccus	uncultured_Defluviicoccus
7c67d3e0c512198437f36ef1b50053cd	0	0	9	7	0	0	0	0	0	0	0	6	Bacteria	Proteobacteria	Alphaproteobacteria	Rhizobiales	Xanthobacteraceae	Rhodoplanes	unidentified
046877d518eee3a04e22d7ec6d02da4a	0	0	9	0	6	0	0	0	0	0	0	7	Bacteria	Acidobacteriota	Blastocatellia	Blastocatellales	Blastocatellaceae	JGI_0001001-H03	unidentified
4b4f60e8bb35bc09b81549eafd9a0f14	0	0	7	0	0	0	0	0	0	15	0	0	Bacteria	Proteobacteria	Alphaproteobacteria	Rhizobiales	Rhizobiaceae	Allorhizobium-Neorhizobium-Pararhizobium-Rhizobium	unidentified
3c4a31a16325e290c969f13730fe32aa	0	0	0	15	0	0	0	7	0	0	0	0	Bacteria	Gemmatimonadota	Gemmatimonadetes	Gemmatimonadales	Gemmatimonadaceae	Gemmatimonas	unidentified
85129bf30d3d82c5a9f0995a2949d269	0	0	0	12	0	0	10	0	0	0	0	0	Bacteria	Actinobacteriota	Acidimicrobiia	Microtrichales	Ilumatobacteraceae	CL500-29_marine_group	groundwater_metagenome
63008c80dc9bba90ca69632c574c86c4	0	0	0	9	0	0	7	0	6	0	0	0	Bacteria	Actinobacteriota	Acidimicrobiia	Microtrichales	Ilumatobacteraceae	CL500-29_marine_group	unidentified
ae90148cb6b464872be51c2d308ed0e3	0	0	0	5	0	8	7	2	0	0	0	0	Bacteria	Proteobacteria	Alphaproteobacteria	Rhizobiales	Hyphomicrobiaceae	Pedomicrobium	unidentified
1574c349d070807ae05b97ba25de2ce8	0	0	0	3	0	0	0	7	12	0	0	0	Bacteria	Armatimonadota	uncultured	uncultured	uncultured	uncultured	unidentified
fd4126dcdfddb30367e6093486d78adc	0	0	0	0	13	0	0	0	9	0	0	0	Bacteria	Actinobacteriota	Actinobacteria	Propionibacteriales	Nocardioidaceae	Nocardioides	unidentified
3874d0ba5f9a156b092c77c82e6a9919	0	0	0	0	9	0	0	0	13	0	0	0	Bacteria	Gemmatimonadota	Gemmatimonadetes	Gemmatimonadales	Gemmatimonadaceae	uncultured	unidentified
35f61cdb1841d538c5ad6ed4b6ff41de	0	0	0	0	0	10	0	0	12	0	0	0	Bacteria	Firmicutes	Clostridia	Clostridiales	Clostridiaceae	Clostridium_sensu_stricto_8	uncultured_bacterium
acbac0f7d81aa859108b3db61ca2b9cb	0	0	0	0	0	0	13	0	9	0	0	0	Bacteria	Proteobacteria	Alphaproteobacteria	Rhizobiales	Beijerinckiaceae	Microvirga	unidentified
87c9252954a88060132cb4a358706efb	0	0	0	0	0	0	13	0	0	0	9	0	Bacteria	Actinobacteriota	Acidimicrobiia	Microtrichales	uncultured	uncultured	unidentified
55daf6f59ae7e55100e4097de0086a65	0	0	0	0	0	0	12	0	0	0	0	10	Bacteria	Bacteroidota	Bacteroidia	Cytophagales	Hymenobacteraceae	Adhaeribacter	unidentified
b69aaec76ddbf9587f47fde1152386ff	0	0	0	0	0	0	0	13	0	0	9	0	Bacteria	Chloroflexi	KD4-96	KD4-96	KD4-96	KD4-96	unidentified
f749ddbf47c11acb38570569111cbb44	0	0	0	0	0	0	0	5	6	5	6	0	Bacteria	Planctomycetota	Planctomycetes	Pirellulales	Pirellulaceae	uncultured	uncultured_bacterium
18fe64ef094577a5fd6a1e57272c87e1	0	0	0	0	0	0	0	0	0	12	0	10	Bacteria	Acidobacteriota	Subgroup_5	Subgroup_5	Subgroup_5	Subgroup_5	uncultured_bacterium
5b88472af0087f0877244e05c4a5d686	15	0	0	0	0	0	0	0	0	0	0	6	Bacteria	Chloroflexi	JG30-KF-CM66	JG30-KF-CM66	JG30-KF-CM66	JG30-KF-CM66	unidentified
3927b19d35f93a2baaf7c167068ae1c5	11	0	0	8	0	0	0	0	2	0	0	0	Bacteria	Bacteroidota	Bacteroidia	Cytophagales	Hymenobacteraceae	Adhaeribacter	unidentified
d15c5d83f3c3767a4641b520350f0a97	10	0	0	0	0	0	0	0	11	0	0	0	Bacteria	Chloroflexi	Ktedonobacteria	C0119	C0119	C0119	uncultured_bacterium
66f1d35285a33b42349aef88ea3b4b3a	9	7	0	0	0	0	0	0	0	0	5	0	Bacteria	Acidobacteriota	Holophagae	Subgroup_7	Subgroup_7	Subgroup_7	unidentified
fbbec91345c15788adcfcae6d4b43d60	0	10	0	0	0	0	0	0	11	0	0	0	Bacteria	Gemmatimonadota	Gemmatimonadetes	Gemmatimonadales	Gemmatimonadaceae	Gemmatimonas	uncultured_bacterium
96355067240509355c4bd4ece17adab6	0	7	0	0	0	0	0	5	0	9	0	0	Bacteria	Actinobacteriota	Actinobacteria	Micrococcales	Micrococcaceae	unidentified	unidentified
cd386b51b89cfa1958b088957e21ca1c	0	6	0	0	0	0	0	0	5	10	0	0	Bacteria	Patescibacteria	Saccharimonadia	Saccharimonadales	Saccharimonadales	Saccharimonadales	unidentified
02fe17da9557e760943d344799f8c4af	0	4	0	0	1	0	0	0	0	16	0	0	Bacteria	Proteobacteria	Gammaproteobacteria	Burkholderiales	Comamonadaceae	Polaromonas	uncultured_rape
8c5c08c08b036c9f64c3c542ed434318	0	3	0	3	2	0	3	0	6	1	0	3	Bacteria	Proteobacteria	Alphaproteobacteria	Rickettsiales	Mitochondria	Mitochondria	uncultured_bacterium
c1c0bd2f4fc89794bc8155a6ff276665	0	0	7	0	0	0	0	0	14	0	0	0	Bacteria	Chloroflexi	TK10	TK10	TK10	TK10	uncultured_Chloroflexi
adb5ec1f35133d02b02383dde16ef8c9	0	0	0	10	0	0	0	0	0	0	11	0	Bacteria	Chloroflexi	Anaerolineae	SBR1031	A4b	A4b	wastewater_metagenome
fb067e159e156be6948b4a9ed1406d76	0	0	0	7	14	0	0	0	0	0	0	0	Bacteria	Proteobacteria	Alphaproteobacteria	Rhizobiales	Methyloligellaceae	unidentified	unidentified
5a32e6033daf1cec41e8a8ad3ec15fa0	0	0	0	4	0	7	3	0	7	0	0	0	Bacteria	Cyanobacteria	Cyanobacteriia	Chloroplast	Chloroplast	Chloroplast	unidentified
5ded750ce350a3f56b17b1639f2999d6	0	0	0	0	8	0	0	0	0	0	0	13	Bacteria	Actinobacteriota	Acidimicrobiia	Microtrichales	Ilumatobacteraceae	Ilumatobacter	metagenome
0f657acd21022c372bb7b09289eeca3d	0	0	0	0	0	11	0	0	10	0	0	0	Bacteria	Actinobacteriota	Actinobacteria	Micromonosporales	Micromonosporaceae	Actinoplanes	unidentified
d5dddba9e636fa2b5f3ff4e8601e8480	0	0	0	0	0	6	0	0	0	15	0	0	Bacteria	Chloroflexi	Chloroflexia	Chloroflexales	Chloroflexaceae	FFCH7168	uncultured_bacterium
5cf504b2eadc766a711b7ed0cc8380ae	0	0	0	0	0	0	0	8	0	0	13	0	Bacteria	Chloroflexi	KD4-96	KD4-96	KD4-96	KD4-96	uncultured_Chloroflexi
f87d0f3fca10527e70990c8580497da2	11	0	0	0	0	9	0	0	0	0	0	0	Bacteria	Acidobacteriota	Holophagae	Subgroup_7	Subgroup_7	Subgroup_7	unidentified
4107c0e2a33acda4841e0e13261d7831	4	0	0	0	0	16	0	0	0	0	0	0	Bacteria	Armatimonadota	uncultured	uncultured	uncultured	uncultured	uncultured_bacterium
79e4f818e1da709ebe35f5573beeee4c	3	5	0	0	4	2	2	0	0	3	0	1	Bacteria	Bacteroidota	Kapabacteria	Kapabacteriales	Kapabacteriales	Kapabacteriales	uncultured_Chlorobiales
e3b772249eba1e89231c5753362904e6	2	0	2	0	0	0	5	0	0	0	3	8	Bacteria	Gemmatimonadota	Gemmatimonadetes	Gemmatimonadales	Gemmatimonadaceae	unidentified	unidentified
a71a58f35375ce8b913ca1cf3d41d117	0	11	0	0	9	0	0	0	0	0	0	0	Bacteria	Bacteroidota	Bacteroidia	Flavobacteriales	Flavobacteriaceae	Flavobacterium	Flavobacterium_saccharophilum
c070d25c9f53f8dd47190c36d68d9882	0	10	0	0	0	10	0	0	0	0	0	0	Bacteria	Actinobacteriota	Actinobacteria	Frankiales	Nakamurellaceae	Nakamurella	uncultured_bacterium
67b5d5e73319f519c29004d015c2494e	0	8	0	0	0	0	0	0	0	0	12	0	Bacteria	Bacteroidota	Bacteroidia	Flavobacteriales	Flavobacteriaceae	Flavobacterium	unidentified
0b2e0cd476b1da7cff45de1412d6d29d	0	6	0	0	0	6	0	0	0	0	8	0	Bacteria	Cyanobacteria	Cyanobacteriia	Cyanobacteriales	Nostocaceae	Nostoc_PCC-7524	unidentified
adf9021d388e40a6ec44777556f382b6	0	5	0	0	0	0	0	0	9	0	0	6	Bacteria	Cyanobacteria	Cyanobacteriia	Cyanobacteriales	Nostocaceae	Anabaena_PCC-7122	Anabaena_cylindrica
3754c02cc8773fce7db2ef374536b356	0	0	13	0	0	0	0	7	0	0	0	0	Bacteria	Planctomycetota	Phycisphaerae	Tepidisphaerales	WD2101_soil_group	WD2101_soil_group	uncultured_bacterium
f3576bfb1f009962b7d9a6865c7f01c2	0	0	13	0	7	0	0	0	0	0	0	0	Bacteria	Chloroflexi	TK10	TK10	TK10	TK10	unidentified
5370d02efc40d218d23f34c9edfd3c49	0	0	12	8	0	0	0	0	0	0	0	0	Bacteria	Actinobacteriota	Actinobacteria	Micrococcales	Microbacteriaceae	Microbacterium	unidentified
f804d01c58081f92e3c29c2b26ed8825	0	0	11	0	0	0	5	0	4	0	0	0	Bacteria	Actinobacteriota	Actinobacteria	Micrococcales	Cellulomonadaceae	Cellulomonas	Cellulomonas_terrae
566528d76a3cb37373d653f6e57423e2	0	0	4	0	0	0	0	0	6	0	6	4	Bacteria	Chloroflexi	TK10	TK10	TK10	TK10	unidentified
9515ffcc1ae88335fb084c27414ba347	0	0	0	9	0	0	0	0	0	11	0	0	Bacteria	Gemmatimonadota	Gemmatimonadetes	Gemmatimonadales	Gemmatimonadaceae	Gemmatimonas	metagenome
f8c0e54cf6ed3a942fc43830e9967d7e	0	0	0	8	0	0	0	0	0	0	0	12	Bacteria	Planctomycetota	Phycisphaerae	Phycisphaerales	Phycisphaeraceae	uncultured	metagenome
b2897bc180ed500b52f6f03b88eb33a8	0	0	0	5	11	0	4	0	0	0	0	0	Bacteria	Actinobacteriota	Actinobacteria	Propionibacteriales	Propionibacteriaceae	Microlunatus	unidentified
db83fa00ae4b847ddb6588fafe219b9b	0	0	0	0	12	0	0	0	0	8	0	0	Bacteria	Armatimonadota	Armatimonadia	Armatimonadales	Armatimonadales	Armatimonadales	uncultured_actinobacterium
52316b8da8ff9e3d8d8ea34292086782	0	0	0	0	10	0	0	0	10	0	0	0	Bacteria	Planctomycetota	Phycisphaerae	Phycisphaerales	Phycisphaeraceae	uncultured	metagenome
171f33d109752e4f356c8f179b8132ed	0	0	0	0	9	0	0	11	0	0	0	0	Bacteria	Patescibacteria	Saccharimonadia	Saccharimonadales	S32	TM7	unidentified
76e015467e63b29b1ff1c20fc5ef1daf	0	0	0	0	0	11	0	0	0	0	9	0	Bacteria	Gemmatimonadota	Gemmatimonadetes	Gemmatimonadales	Gemmatimonadaceae	uncultured	unidentified
b34c5d4566c0674521c42aa25d6ccad8	0	0	0	0	0	9	0	0	8	0	3	0	Bacteria	Chloroflexi	Anaerolineae	Ardenticatenales	uncultured	uncultured	uncultured_Litorilinea
b6172933a4f2a0f35d78d27d9a82f87b	0	0	0	0	0	8	12	0	0	0	0	0	Bacteria	Actinobacteriota	Acidimicrobiia	IMCC26256	IMCC26256	IMCC26256	unidentified
bf42c54bb58321e548e7b78976a62f35	0	0	0	0	0	3	0	0	0	17	0	0	Bacteria	Proteobacteria	Alphaproteobacteria	Micropepsales	Micropepsaceae	uncultured	unidentified
70bbe07043f859e697fc246e5e2b754a	0	0	0	0	0	0	14	0	6	0	0	0	Bacteria	Bacteroidota	Bacteroidia	Cytophagales	Hymenobacteraceae	Adhaeribacter	unidentified
92f4dd3a6b4f29ff7fae1e42a3144ab2	0	0	0	0	0	0	6	0	0	4	0	10	Bacteria	Proteobacteria	Alphaproteobacteria	Rhizobiales	Rhizobiaceae	Allorhizobium-Neorhizobium-Pararhizobium-Rhizobium	unidentified
092b36b7b582c1be17d73c9f4c341a3c	0	0	0	0	0	0	0	0	10	0	10	0	Bacteria	Gemmatimonadota	Gemmatimonadetes	Gemmatimonadales	Gemmatimonadaceae	Roseisolibacter	unidentified
d7c8f6e6f0f838c6f8d062c958306ec7	0	0	0	0	0	0	0	0	7	13	0	0	Bacteria	Gemmatimonadota	Gemmatimonadetes	Gemmatimonadales	Gemmatimonadaceae	Gemmatimonas	unidentified
7609243ecbac3bb6accfd4abcdc3aa98	0	0	0	0	0	0	0	0	0	12	8	0	Bacteria	Bacteroidota	Bacteroidia	Flavobacteriales	Flavobacteriaceae	Flavobacterium	unidentified
576996a396b33a56cda6730bbed47d27	10	0	0	9	0	0	0	0	0	0	0	0	Bacteria	Planctomycetota	Phycisphaerae	Tepidisphaerales	WD2101_soil_group	WD2101_soil_group	unidentified
2c390cc2792464b800e6315b4c40530c	8	0	4	3	0	0	0	0	0	4	0	0	Bacteria	Proteobacteria	Alphaproteobacteria	Rhizobiales	Rhizobiaceae	unidentified	unidentified
c6d82863ffab67c81697f9dd17943028	8	0	0	0	0	0	0	7	0	0	4	0	Bacteria	Actinobacteriota	Actinobacteria	Streptomycetales	Streptomycetaceae	Streptomyces	unidentified
55b0a8d1947d8c37d4d6490e87115b46	6	0	6	0	0	0	0	0	0	0	0	7	Bacteria	Chloroflexi	Chloroflexia	Thermomicrobiales	JG30-KF-CM45	JG30-KF-CM45	unidentified
43e901ca367372358606cefc4f1796fe	5	0	0	0	0	14	0	0	0	0	0	0	Bacteria	Planctomycetota	Phycisphaerae	Tepidisphaerales	WD2101_soil_group	WD2101_soil_group	unidentified
fda5a1d4d57ee245572d2dc1b7105b4f	3	0	0	0	0	0	0	0	0	0	5	11	Bacteria	Chloroflexi	Chloroflexia	Chloroflexales	Roseiflexaceae	uncultured	uncultured_bacterium
e9a58c59c911666a7980a58c063e68eb	1	1	5	3	0	1	1	1	2	1	3	0	Bacteria	Bacteroidota	Bacteroidia	Chitinophagales	Saprospiraceae	uncultured	unidentified
71fe70754a6802ae5dbd485d68d59dac	0	14	1	0	0	0	1	0	1	0	0	2	Bacteria	Proteobacteria	Alphaproteobacteria	Rhizobiales	Hyphomicrobiaceae	Pedomicrobium	unidentified
d7d6eb882c41e55359c4e9a05376ec82	0	10	0	0	0	9	0	0	0	0	0	0	Bacteria	Chloroflexi	Chloroflexia	Thermomicrobiales	JG30-KF-CM45	JG30-KF-CM45	uncultured_bacterium
4bf50edb21c5df96bc1872ef5e8aaedb	0	8	0	0	11	0	0	0	0	0	0	0	Bacteria	Gemmatimonadota	Gemmatimonadetes	Gemmatimonadales	Gemmatimonadaceae	Gemmatimonas	unidentified
36f5f595764119c0d642d097c74e0d62	0	2	0	4	0	0	3	0	4	0	0	6	Bacteria	Actinobacteriota	Acidimicrobiia	Microtrichales	Ilumatobacteraceae	uncultured	uncultured_Acidimicrobiaceae
77ab7c206cd41f9bafba38230a825d1c	0	2	0	4	0	0	0	5	0	0	0	8	Bacteria	Acidobacteriota	Holophagae	Subgroup_7	Subgroup_7	Subgroup_7	unidentified
ad04d8745249765caf7877e5ac6f9023	0	0	10	9	0	0	0	0	0	0	0	0	Bacteria	Chloroflexi	Chloroflexia	Thermomicrobiales	JG30-KF-CM45	JG30-KF-CM45	unidentified
5704dac8c0c2ede8954fe3e9e9741ff3	0	0	10	0	0	9	0	0	0	0	0	0	Bacteria	Firmicutes	Clostridia	Clostridia	Hungateiclostridiaceae	UCG-012	unidentified
cae92f19ac0f40c964f8671a9f689f5e	0	0	7	0	0	0	12	0	0	0	0	0	Bacteria	Chloroflexi	Anaerolineae	SBR1031	A4b	A4b	uncultured_soil
68d6fef4c9951d826f83dbaad7a542cf	0	0	2	0	0	0	6	0	11	0	0	0	Bacteria	Planctomycetota	Planctomycetes	Pirellulales	Pirellulaceae	Pirellula	uncultured_Pasteuria
fd1962e38918e1f1696861ab43d50c48	0	0	0	8	9	0	0	0	0	2	0	0	Bacteria	Proteobacteria	Alphaproteobacteria	Sphingomonadales	Sphingomonadaceae	unidentified	unidentified
82796f37c38af7c2e3c1a5e8e8720991	0	0	0	6	0	0	5	0	0	0	0	8	Bacteria	Actinobacteriota	Actinobacteria	unidentified	unidentified	unidentified	unidentified
65bb5b71823c85edf6f70ee011cbfe72	0	0	0	0	11	0	0	0	0	0	0	8	Bacteria	Armatimonadota	uncultured	uncultured	uncultured	uncultured	uncultured_bacterium
870b87f7554899e6943bf096adad2496	0	0	0	0	9	10	0	0	0	0	0	0	Bacteria	Proteobacteria	Alphaproteobacteria	Tistrellales	Geminicoccaceae	Candidatus_Alysiosphaera	unidentified
31490ca8a859278ac0e2c44b4d1ebcad	0	0	0	0	6	8	0	0	0	5	0	0	Bacteria	Actinobacteriota	Actinobacteria	Propionibacteriales	Nocardioidaceae	Nocardioides	unidentified
6b96f16c33e9b960f135d344e74b9fac	0	0	0	0	5	0	14	0	0	0	0	0	Bacteria	Planctomycetota	Planctomycetes	Gemmatales	Gemmataceae	uncultured	uncultured_bacterium
8d103ddc839cfe2c3ba9bf088bf0ceee	0	0	0	0	0	9	0	0	10	0	0	0	Bacteria	Actinobacteriota	Acidimicrobiia	Microtrichales	Iamiaceae	Iamia	unidentified
145f94c9618608c9da91c3f6d7e8e9b7	0	0	0	0	0	0	12	0	0	0	7	0	Bacteria	Gemmatimonadota	Gemmatimonadetes	Gemmatimonadales	Gemmatimonadaceae	unidentified	unidentified
29e49a51e18f1cb496dea87b4a4fa748	0	0	0	0	0	0	4	0	0	15	0	0	Bacteria	Bacteroidota	Bacteroidia	Cytophagales	Microscillaceae	Flexibacter	uncultured_bacterium
28ff2ff3f5f657ae2f26e2fe76e5a193	0	0	0	0	0	0	0	11	0	0	8	0	Bacteria	Actinobacteriota	Actinobacteria	Micrococcales	unidentified	unidentified	unidentified
797fb6c5eecaf5c4321ae249329f7ae5	0	0	0	0	0	0	0	7	12	0	0	0	Bacteria	Gemmatimonadota	Gemmatimonadetes	Gemmatimonadales	Gemmatimonadaceae	Gemmatimonas	unidentified
2ca2cabed17d0ce6af3b3864024e87c2	0	0	0	0	0	0	0	0	10	0	0	9	Bacteria	Chloroflexi	Ktedonobacteria	C0119	C0119	C0119	uncultured_bacterium
ff29d2925ad4e774692f791ccbe773db	0	0	0	0	0	0	0	0	9	0	0	10	Bacteria	Gemmatimonadota	Gemmatimonadetes	Gemmatimonadales	Gemmatimonadaceae	unidentified	unidentified
db6cdf8261e4085ea3d75220cc7bbc78	8	0	0	0	0	0	0	0	0	10	0	0	Bacteria	Actinobacteriota	Actinobacteria	Micromonosporales	Micromonosporaceae	unidentified	unidentified
45b64faa393d24daec08ba312ec050e1	8	0	10	0	0	0	0	0	0	0	0	0	Bacteria	Actinobacteriota	Actinobacteria	Frankiales	Acidothermaceae	Acidothermus	uncultured_bacterium
b34113b480d22f70bc624d3375cc51c8	7	0	0	0	0	11	0	0	0	0	0	0	Bacteria	Planctomycetota	Phycisphaerae	Phycisphaerales	Phycisphaeraceae	SM1A02	uncultured_prokaryote
17de043ea9d8398d38a8755d0e64315a	7	0	0	0	0	0	6	0	0	0	0	5	Bacteria	Chloroflexi	JG30-KF-CM66	JG30-KF-CM66	JG30-KF-CM66	JG30-KF-CM66	uncultured_Anaerolineales
8bc532b34cd808430d852be45f497d0c	3	0	0	0	0	0	3	0	6	0	0	6	Bacteria	Gemmatimonadota	Gemmatimonadetes	Gemmatimonadales	Gemmatimonadaceae	uncultured	unidentified
222a2dd247ff707e37c50aae51938e3d	2	0	0	0	0	0	7	0	0	9	0	0	Bacteria	Firmicutes	Bacilli	Thermoactinomycetales	Thermoactinomycetaceae	Shimazuella	uncultured_bacterium
1e07c1549e6348110e6e39d1049ea27f	0	5	0	0	9	4	0	0	0	0	0	0	Bacteria	Chloroflexi	unidentified	unidentified	unidentified	unidentified	unidentified
0e58cb9e86cdc693dd1fc54a141998c3	0	2	0	1	5	3	2	0	2	2	0	1	Bacteria	Armatimonadota	Chthonomonadetes	Chthonomonadales	Chthonomonadales	Chthonomonadales	uncultured_bacterium
006c229f09cb5c9c83dc2574b6618f8c	0	0	10	0	0	0	0	0	4	0	0	4	Bacteria	Chloroflexi	Anaerolineae	Caldilineales	Caldilineaceae	uncultured	uncultured_soil
be7632d4670056deb354ee6ac4e00ca7	0	0	10	0	0	0	0	0	8	0	0	0	Bacteria	Actinobacteriota	Actinobacteria	Propionibacteriales	Nocardioidaceae	Nocardioides	uncultured_bacterium
7f3e193c6037b50e111339caf124d2a7	0	0	10	0	0	0	0	0	8	0	0	0	Bacteria	Armatimonadota	Fimbriimonadia	Fimbriimonadales	Fimbriimonadaceae	Fimbriimonadaceae	unidentified
3f95edfc0aae60f0ac796a01f711ace9	0	0	9	0	0	9	0	0	0	0	0	0	Bacteria	Proteobacteria	Alphaproteobacteria	Tistrellales	Geminicoccaceae	Geminicoccus	uncultured_bacterium
78bf00357f594eb3ee3a2c6234f27025	0	0	9	0	0	0	0	0	1	0	8	0	Bacteria	Actinobacteriota	Actinobacteria	Corynebacteriales	Nocardiaceae	Williamsia	unidentified
27759482ab814d41251acec3008e81d1	0	0	3	0	8	0	0	7	0	0	0	0	Bacteria	Actinobacteriota	Actinobacteria	Micromonosporales	Micromonosporaceae	Hamadaea	unidentified
fd8b5464fc844c18a3992c3ffff20dff	0	0	0	12	0	0	0	0	0	0	6	0	Bacteria	Abditibacteriota	Abditibacteria	Abditibacteriales	Abditibacteriaceae	Abditibacterium	uncultured_bacterium
23e79c63f9c7ebc50f099f235d9759b8	0	0	0	7	0	0	0	11	0	0	0	0	Bacteria	Gemmatimonadota	Gemmatimonadetes	Gemmatimonadales	Gemmatimonadaceae	Gemmatimonas	uncultured_bacterium
e38bec7c6368b5f8a34ef133ef688078	0	0	0	5	0	8	5	0	0	0	0	0	Bacteria	Proteobacteria	Alphaproteobacteria	Sphingomonadales	Sphingomonadaceae	Sphingomonas	unidentified
b7041cc873b19590f9ad5ecc17775079	0	0	0	0	14	0	0	0	4	0	0	0	Bacteria	Actinobacteriota	Acidimicrobiia	unidentified	unidentified	unidentified	unidentified
6cdc85908631891d8fcb98c8c874f0ee	0	0	0	0	0	9	9	0	0	0	0	0	Bacteria	Gemmatimonadota	Gemmatimonadetes	Gemmatimonadales	Gemmatimonadaceae	Gemmatimonas	unidentified
a9fad3e3f9ec76ae13b42cb09f4f7f05	0	0	0	0	0	0	0	12	0	0	0	6	Bacteria	Actinobacteriota	Actinobacteria	Propionibacteriales	Nocardioidaceae	Nocardioides	unidentified
c94451903e7dc7c0b60dc7fbf95886a6	0	0	0	0	0	0	0	0	12	0	6	0	Bacteria	Bacteroidota	Kapabacteria	Kapabacteriales	Kapabacteriales	Kapabacteriales	uncultured_bacterium
0c83e9563a9891acd8488df3e47cca0b	0	0	0	0	0	0	0	0	0	10	0	8	Bacteria	Acidobacteriota	Blastocatellia	Blastocatellales	Blastocatellaceae	uncultured	unidentified
df13215d9f911ddbefc4a890571c0c01	0	0	0	0	0	0	0	0	0	6	7	5	Bacteria	Gemmatimonadota	Gemmatimonadetes	Gemmatimonadales	Gemmatimonadaceae	uncultured	unidentified
bd138dc3eef6d4816b63f6982c8aff83	9	0	0	0	0	0	8	0	0	0	0	0	Bacteria	Acidobacteriota	Subgroup_5	Subgroup_5	Subgroup_5	Subgroup_5	uncultured_bacterium
14273a83e76cea027aef3ef5074e8560	9	0	0	0	8	0	0	0	0	0	0	0	Bacteria	Actinobacteriota	Acidimicrobiia	Microtrichales	uncultured	uncultured	unidentified
cd8817c907e5679268a13aafd3879003	7	0	0	10	0	0	0	0	0	0	0	0	Bacteria	Actinobacteriota	Acidimicrobiia	IMCC26256	IMCC26256	IMCC26256	unidentified
1368047aa127223776f422a2f71f6c16	5	0	0	0	0	0	6	0	0	0	0	6	Bacteria	Actinobacteriota	Actinobacteria	Kineosporiales	Kineosporiaceae	Kineococcus	uncultured_bacterium
841dc022f6f6ef68119332d6a8d30a09	0	11	0	0	0	0	0	0	0	6	0	0	Bacteria	Gemmatimonadota	Gemmatimonadetes	Gemmatimonadales	Gemmatimonadaceae	Gemmatimonas	uncultured_soil
1d2e30bcb3a9a8590a4e7d2a415b01d8	0	9	0	0	0	0	0	0	0	0	8	0	Bacteria	Actinobacteriota	Acidimicrobiia	Microtrichales	Ilumatobacteraceae	uncultured	metagenome
cc6aca6d4e1203d6eaa8cfa93922c70e	0	8	0	0	0	0	0	5	4	0	0	0	Bacteria	Bacteroidota	Bacteroidia	Flavobacteriales	Flavobacteriaceae	Flavobacterium	unidentified
5e18051365058f5774917ddef2d7c171	0	4	0	0	0	0	8	0	0	0	5	0	Bacteria	Abditibacteriota	Abditibacteria	Abditibacteriales	Abditibacteriaceae	Abditibacterium	uncultured_bacterium
22523807881dd997b4a8eba139bd935d	0	3	4	0	0	5	0	1	0	1	2	1	Bacteria	Actinobacteriota	Actinobacteria	Propionibacteriales	Propionibacteriaceae	Microlunatus	unidentified
3f8cc307c08b7a67f2a65ecbcfd6961d	0	1	0	9	0	4	0	0	3	0	0	0	Bacteria	Actinobacteriota	Thermoleophilia	Solirubrobacterales	Solirubrobacteraceae	Conexibacter	uncultured_bacterium
c2aa254a385be629c3fd94bb80128f4f	0	0	8	0	9	0	0	0	0	0	0	0	Bacteria	Planctomycetota	Phycisphaerae	Tepidisphaerales	WD2101_soil_group	WD2101_soil_group	unidentified
373974524f4843a194abe3b79f330dc8	0	0	6	0	6	0	0	0	0	5	0	0	Bacteria	Actinobacteriota	Actinobacteria	Micrococcales	Microbacteriaceae	Pseudoclavibacter	Pseudoclavibacter_helvolus
c8454fcd67c8f10f1eea4b04442f2b96	0	0	2	0	0	0	5	0	5	5	0	0	Bacteria	Armatimonadota	uncultured	uncultured	uncultured	uncultured	uncultured_bacterium
ab3b70bef7f2c2d4214af55092b85b9d	0	0	0	11	0	0	6	0	0	0	0	0	Bacteria	Actinobacteriota	Actinobacteria	Streptomycetales	Streptomycetaceae	Streptomyces	unidentified
e4aac5987527a1f7d72bc43294bf853b	0	0	0	0	6	0	0	0	0	0	0	11	Bacteria	Patescibacteria	Saccharimonadia	Saccharimonadales	LWQ8	LWQ8	unidentified
3996272a75794cf5f15cd9ea129c1d83	0	0	0	0	0	13	0	4	0	0	0	0	Bacteria	Actinobacteriota	Actinobacteria	Streptosporangiales	Nocardiopsaceae	Nocardiopsis	Nocardiopsis_prasina
873bdeff1484f2ec7cbad38e419805e5	0	0	0	0	0	2	11	4	0	0	0	0	Bacteria	Actinobacteriota	Actinobacteria	Propionibacteriales	Nocardioidaceae	Nocardioides	unidentified
e0227a475783b5d71c2a9a599cc39cb0	0	0	0	0	0	0	8	0	0	0	9	0	Bacteria	Chloroflexi	TK10	TK10	TK10	TK10	metagenome
dc2ccf2b23220db51b761eea7e83e978	0	0	0	0	0	0	0	0	8	9	0	0	Bacteria	Patescibacteria	Saccharimonadia	Saccharimonadales	Saccharimonadales	Saccharimonadales	unidentified
a2596815ca9702f8c97a9a0d9d62f1e4	0	0	0	0	0	0	0	0	0	10	7	0	Bacteria	Actinobacteriota	Actinobacteria	Micrococcales	Microbacteriaceae	Lysinimonas	unidentified
de1b63b4d3fa13bde53dec46cc070ac8	0	0	0	0	0	0	0	0	0	8	9	0	Bacteria	Acidobacteriota	Acidobacteriae	Bryobacterales	Bryobacteraceae	Bryobacter	unidentified
fb4d9be23d5b28d6e64443a9393d1d9c	8	0	0	8	0	0	0	0	0	0	0	0	Bacteria	Planctomycetota	Phycisphaerae	Tepidisphaerales	WD2101_soil_group	WD2101_soil_group	unidentified
fbf19926fcd18611190bf294e829ab90	7	0	0	0	0	0	9	0	0	0	0	0	Bacteria	Actinobacteriota	Actinobacteria	Propionibacteriales	Propionibacteriaceae	Microlunatus	uncultured_bacterium
fc90c09cb775caef8b5721323a4a8a38	5	0	0	0	0	0	0	0	0	11	0	0	Bacteria	Myxococcota	Polyangia	Nannocystales	Nannocystaceae	Nannocystis	metagenome
3ed5a82a63d982fa044371fb1576a429	0	10	0	0	0	0	6	0	0	0	0	0	Bacteria	Proteobacteria	Alphaproteobacteria	Rhizobiales	Devosiaceae	Devosia	unidentified
dbbaff27ca0384c23dcaadfa6edabdf2	0	6	0	10	0	0	0	0	0	0	0	0	Bacteria	Chloroflexi	Anaerolineae	SBR1031	A4b	A4b	uncultured_soil
44444053dcd70eb5386108cc886038ef	0	3	2	0	0	0	0	0	0	1	10	0	Bacteria	Proteobacteria	Alphaproteobacteria	Sphingomonadales	Sphingomonadaceae	Sphingobium	unidentified
0e2e090c0f3ef7c6539abef8e8d37913	0	0	10	0	0	0	0	0	0	0	0	6	Bacteria	Proteobacteria	Alphaproteobacteria	Defluviicoccales	Defluviicoccaceae	Defluviicoccus	unidentified
46a1e7f45f11bd19ee99c39a93572fd6	0	0	8	0	8	0	0	0	0	0	0	0	Bacteria	Proteobacteria	Alphaproteobacteria	Sphingomonadales	Sphingomonadaceae	Altererythrobacter	unidentified
91d3fc35ae5d73d951c77219719055b2	0	0	0	4	0	0	0	0	9	0	0	3	Bacteria	Chloroflexi	Chloroflexia	Thermomicrobiales	JG30-KF-CM45	JG30-KF-CM45	uncultured_bacterium
9c73d06a1f32a9c66161b2c8ce61359f	0	0	0	0	11	0	0	0	0	0	5	0	Bacteria	Armatimonadota	Armatimonadia	Armatimonadales	Armatimonadales	Armatimonadales	uncultured_Armatimonadetes
d1aada306d700cf0b609cf56675d2fb1	0	0	0	0	7	0	0	9	0	0	0	0	Bacteria	Actinobacteriota	Acidimicrobiia	IMCC26256	IMCC26256	IMCC26256	unidentified
2d70b35f1a6c2e148e472179e6aacb97	0	0	0	0	7	9	0	0	0	0	0	0	Bacteria	Armatimonadota	uncultured	uncultured	uncultured	uncultured	uncultured_bacterium
6e41514b8020c633f0a66c5e2e3d2726	0	0	0	0	0	11	0	0	0	5	0	0	Bacteria	Bacteroidota	Bacteroidia	Flavobacteriales	Flavobacteriaceae	Flavobacterium	unidentified
c17391f8bb01366bcd99c5fae0b9820b	0	0	0	0	0	6	0	0	0	0	0	10	Bacteria	Gemmatimonadota	Gemmatimonadetes	Gemmatimonadales	Gemmatimonadaceae	unidentified	unidentified
76b5bce1a1bc05ebd49314c585a9f786	0	0	0	0	0	1	14	1	0	0	0	0	Bacteria	Actinobacteriota	Actinobacteria	Propionibacteriales	Nocardioidaceae	Nocardioides	unidentified
fa5e5ae9cb967daeb6a158226f78e4c3	0	0	0	0	0	0	6	0	0	5	0	5	Bacteria	Bacteroidota	Bacteroidia	Cytophagales	Hymenobacteraceae	Adhaeribacter	uncultured_bacterium
1aa141bc5ccee6e937414880acf59b38	0	0	0	0	0	0	0	9	0	0	0	7	Bacteria	Armatimonadota	Armatimonadia	Armatimonadales	Armatimonadales	Armatimonadales	unidentified
ec6119723adcf5e9339157d4c88270a5	0	0	0	0	0	0	0	0	0	8	8	0	Bacteria	Acidobacteriota	Acidobacteriae	Bryobacterales	Bryobacteraceae	Bryobacter	unidentified
712f3cb0780c361aef31de9356ae38c6	9	0	0	0	0	0	0	0	0	0	0	6	Bacteria	Chloroflexi	KD4-96	KD4-96	KD4-96	KD4-96	uncultured_Chloroflexi
ba3b3d36ed0b440ed0f652a78d82847a	8	0	0	0	0	0	0	0	0	7	0	0	Bacteria	Cyanobacteria	Cyanobacteriia	Cyanobacteriales	Nostocaceae	unidentified	unidentified
6c72fd1c89762da2c5bf5f078724ed24	7	0	0	8	0	0	0	0	0	0	0	0	Bacteria	Acidobacteriota	Subgroup_5	Subgroup_5	Subgroup_5	Subgroup_5	uncultured_bacterium
87cf28b2835e5ec03e4dd93e7715d9a0	7	0	0	0	0	8	0	0	0	0	0	0	Bacteria	Bacteroidota	Bacteroidia	Chitinophagales	Saprospiraceae	uncultured	unidentified
bf08124bf742dd97bb7ff4447b9484bf	6	0	0	0	0	0	0	0	0	0	0	9	Bacteria	Planctomycetota	Planctomycetes	Gemmatales	Gemmataceae	uncultured	uncultured_bacterium
8076c249c4c070d81f93c382667b2cf0	4	0	6	0	0	0	5	0	0	0	0	0	Bacteria	Cyanobacteria	Sericytochromatia	Sericytochromatia	Sericytochromatia	Sericytochromatia	unidentified
c05f0804800cd5dd0be1791c13873238	0	11	0	0	0	0	0	0	0	0	4	0	Bacteria	Chloroflexi	Chloroflexia	Chloroflexales	Roseiflexaceae	uncultured	uncultured_soil
ff4f9cb248b2892e990c5ffbe740a529	0	10	0	0	0	0	0	0	5	0	0	0	Bacteria	Proteobacteria	Alphaproteobacteria	Rhizobiales	Hyphomicrobiaceae	Hyphomicrobium	unidentified
c9b9d88e6ad085b925358d6d0b3d8875	0	9	0	0	0	0	0	0	0	0	6	0	Bacteria	Planctomycetota	Phycisphaerae	Phycisphaerales	Phycisphaeraceae	uncultured	metagenome
0805e282226603cab9bdf582e2283410	0	8	0	0	3	0	0	0	0	0	0	4	Bacteria	Actinobacteriota	Actinobacteria	Propionibacteriales	Nocardioidaceae	Marmoricola	uncultured_bacterium
864afcbfb27cc8a59c69d1eeb735567b	0	5	0	0	0	0	0	0	0	0	7	3	Bacteria	Actinobacteriota	Actinobacteria	Streptosporangiales	Streptosporangiaceae	unidentified	unidentified
3fa5d23fedce44a16e2adca0f3e2c204	0	2	0	0	0	0	0	0	0	2	11	0	Bacteria	Proteobacteria	Alphaproteobacteria	Rhodobacterales	Rhodobacteraceae	Amaricoccus	uncultured_bacterium
95c47ab55ff37e401b84ae6cc8646d2e	0	1	0	0	5	4	1	0	0	2	0	2	Bacteria	Bacteroidota	Kapabacteria	Kapabacteriales	Kapabacteriales	Kapabacteriales	uncultured_Chlorobiales
c233ea2e7abf42a92f0b93d6b39bc18f	0	0	10	0	0	5	0	0	0	0	0	0	Bacteria	Chloroflexi	Chloroflexia	Thermomicrobiales	JG30-KF-CM45	JG30-KF-CM45	uncultured_bacterium
8d06876397ac34086eb671125e217717	0	0	6	0	0	0	0	0	0	0	0	9	Bacteria	Proteobacteria	Alphaproteobacteria	Rhizobiales	Xanthobacteraceae	unidentified	unidentified
3f05429510c5c09fb5226748ad27edce	0	0	4	0	6	0	0	0	0	5	0	0	Bacteria	Actinobacteriota	Acidimicrobiia	Microtrichales	Ilumatobacteraceae	uncultured	uncultured_Acidimicrobiaceae
cabba843c6b330f13f26376c0f6d05be	0	0	0	9	0	0	0	0	6	0	0	0	Bacteria	Chloroflexi	TK10	TK10	TK10	TK10	uncultured_Dehalogenimonas
70226d73caa2c902761620a530f347f1	0	0	0	6	5	0	4	0	0	0	0	0	Bacteria	Chloroflexi	Anaerolineae	Caldilineales	Caldilineaceae	uncultured	uncultured_bacterium
0367eb964fb54a51ef444554bb4de2d7	0	0	0	3	0	0	0	0	0	0	12	0	Bacteria	Actinobacteriota	Actinobacteria	Micrococcales	Promicromonosporaceae	Cellulosimicrobium	unidentified
767d91ff18883825e00b685054ec3965	0	0	0	0	9	0	0	0	6	0	0	0	Bacteria	Bacteroidota	Bacteroidia	Flavobacteriales	Flavobacteriaceae	Flavobacterium	unidentified
89ce0de70c56780a9bf2211598bb5a3d	0	0	0	0	6	0	0	0	9	0	0	0	Bacteria	Chloroflexi	TK10	TK10	TK10	TK10	unidentified
b74ffd1ab36bfe96242d0b606c020c70	0	0	0	0	4	0	0	0	11	0	0	0	Bacteria	Actinobacteriota	Actinobacteria	Kineosporiales	Kineosporiaceae	Kineosporia	Kineosporia_aurantiaca
616b63b12c0390eb34c253f50193a36f	0	0	0	0	4	0	7	0	4	0	0	0	Bacteria	Proteobacteria	Alphaproteobacteria	Elsterales	uncultured	uncultured	unidentified
8e00beabfa14ea4642fa8f936b82d8f8	0	0	0	0	0	6	0	0	0	0	0	9	Bacteria	Actinobacteriota	Actinobacteria	Propionibacteriales	Nocardioidaceae	Nocardioides	unidentified
86f42af7f5e3d1de2ce31fbeb6187bf2	0	0	0	0	0	6	3	0	0	0	0	6	Bacteria	Gemmatimonadota	Gemmatimonadetes	Gemmatimonadales	Gemmatimonadaceae	unidentified	unidentified
32a86df0702e5fd06d62a0cb7b4a7df3	0	0	0	0	0	0	8	0	0	7	0	0	Bacteria	Proteobacteria	Alphaproteobacteria	Reyranellales	Reyranellaceae	Reyranella	unidentified
ecd1725896f830ea0d08590ee6b86515	0	0	0	0	0	0	0	8	0	0	0	7	Bacteria	Actinobacteriota	Acidimicrobiia	Microtrichales	Ilumatobacteraceae	CL500-29_marine_group	unidentified
953be448a01038c734638d9b64526e09	0	0	0	0	0	0	0	3	1	0	11	0	Bacteria	Chloroflexi	TK10	TK10	TK10	TK10	unidentified
0a6d994d939b2499767f68527a781355	0	0	0	0	0	0	0	0	0	8	7	0	Bacteria	Chloroflexi	Anaerolineae	SBR1031	A4b	A4b	uncultured_bacterium
ef499253df505f99d3d5eb8d15749d10	9	0	0	0	0	0	0	0	0	5	0	0	Bacteria	Chloroflexi	Chloroflexia	Chloroflexales	Roseiflexaceae	uncultured	uncultured_soil
bbd99b96283c2cbc19a0c94ec37c0d9a	6	0	0	2	0	0	0	0	6	0	0	0	Bacteria	Gemmatimonadota	Gemmatimonadetes	Gemmatimonadales	Gemmatimonadaceae	unidentified	unidentified
13a24233eef0c907fd2d0c1e932c060c	5	0	0	0	0	0	0	0	0	0	0	9	Bacteria	Actinobacteriota	Actinobacteria	Kineosporiales	Kineosporiaceae	unidentified	unidentified
d7159613beef5f260f87d7b11e667e5e	0	10	0	0	0	0	0	0	4	0	0	0	Bacteria	Proteobacteria	Alphaproteobacteria	Rhizobiales	Hyphomicrobiaceae	Pedomicrobium	unidentified
384bd71121c5de9a365206dca5e15de2	0	7	0	0	0	0	0	7	0	0	0	0	Bacteria	Actinobacteriota	Actinobacteria	unidentified	unidentified	unidentified	unidentified
64be9c93dc4b136dd3f3ac61b6712d6e	0	5	2	0	0	7	0	0	0	0	0	0	Bacteria	Acidobacteriota	Subgroup_5	Subgroup_5	Subgroup_5	Subgroup_5	uncultured_bacterium
d5fbe4110ca63070f654d36075d36d29	0	5	0	0	0	0	0	4	5	0	0	0	Bacteria	Gemmatimonadota	Gemmatimonadetes	Gemmatimonadales	Gemmatimonadaceae	Roseisolibacter	uncultured_Gemmatimonadetes
8020352a961a4bb9c59528b89cd851d5	0	0	9	0	0	5	0	0	0	0	0	0	Bacteria	Planctomycetota	Planctomycetes	Pirellulales	Pirellulaceae	Pirellula	uncultured_bacterium
9b2277d7ef116a16e6bb83e41c0073d1	0	0	6	0	0	0	0	0	0	0	4	4	Bacteria	Proteobacteria	Alphaproteobacteria	Rhizobiales	Beijerinckiaceae	Microvirga	unidentified
b706d55c4f7b014db73ed51a2d224eaa	0	0	6	3	0	0	0	0	0	0	5	0	Bacteria	Actinobacteriota	Actinobacteria	Micrococcales	Promicromonosporaceae	Cellulosimicrobium	unidentified
04d83c984ccc3f19f7ed23065922c3c6	0	0	6	4	0	0	0	0	0	3	1	0	Bacteria	Chloroflexi	Chloroflexia	Chloroflexales	Roseiflexaceae	Kouleothrix	uncultured_bacterium
9f01726e1970ccc366dc0f7d421603dd	0	0	5	5	0	0	0	0	0	4	0	0	Bacteria	Proteobacteria	Alphaproteobacteria	Rhizobiales	Beijerinckiaceae	FFCH5858	uncultured_bacterium
a5588747809ba9aa6ab4135296657d59	0	0	4	0	0	1	6	0	3	0	0	0	Bacteria	Bacteroidota	Bacteroidia	Flavobacteriales	Flavobacteriaceae	Flavobacterium	unidentified
16c13d314690617564fdcfb1bf1ceb6d	0	0	0	7	0	0	0	7	0	0	0	0	Bacteria	Proteobacteria	Alphaproteobacteria	Rhizobiales	D05-2	D05-2	uncultured_Mesorhizobium
ff90802dc63e8167f77be64bd75a9694	0	0	0	0	8	4	0	0	0	0	0	2	Bacteria	Proteobacteria	Alphaproteobacteria	Rhizobiales	Rhizobiales_Incertae_Sedis	Bauldia	unidentified
e54a783b09a3788a029e7bbd43027726	0	0	0	0	0	8	6	0	0	0	0	0	Bacteria	Actinobacteriota	Actinobacteria	Streptomycetales	Streptomycetaceae	Streptomyces	unidentified
d0c3ca53c70003b12c5554994519a524	0	0	0	0	0	7	7	0	0	0	0	0	Bacteria	Armatimonadota	uncultured	uncultured	uncultured	uncultured	uncultured_Firmicutes
6ad8e459cf9cab11ae98f2aba5c126d9	0	0	0	0	0	6	0	0	8	0	0	0	Bacteria	Cyanobacteria	Cyanobacteriia	Cyanobacteriales	Nostocaceae	Nodularia_PCC-9350	unidentified
d793ed68e191d01d45fe0e135738e52a	0	0	0	0	0	0	0	6	0	0	0	8	Bacteria	Armatimonadota	Armatimonadia	Armatimonadales	Armatimonadales	Armatimonadales	uncultured_bacterium
bdacc9631066d5ef74e97e5b44b56e61	0	0	0	0	0	0	0	5	0	9	0	0	Bacteria	Chloroflexi	Anaerolineae	Ardenticatenales	Ardenticatenaceae	uncultured	unidentified_marine
5ee4873290f4e0549f50939c78c3c4d0	0	0	0	0	0	0	0	5	0	0	9	0	Bacteria	Armatimonadota	Armatimonadia	Armatimonadales	Armatimonadales	Armatimonadales	uncultured_actinobacterium
bcdaa19efe18ac725ba04219ed992726	0	0	0	0	0	0	0	0	5	0	0	9	Bacteria	Actinobacteriota	Actinobacteria	Streptomycetales	Streptomycetaceae	Kitasatospora	Kitasatospora_gansuensis
aa1b8bd632b6f51dbc162fec39f6f8fc	6	0	0	0	0	7	0	0	0	0	0	0	Bacteria	Cyanobacteria	Cyanobacteriia	Chloroplast	Chloroplast	Chloroplast	unidentified
54a90a399529d36157c88baab59f0452	3	0	5	0	0	5	0	0	0	0	0	0	Bacteria	Actinobacteriota	Acidimicrobiia	Actinomarinales	Actinomarinales	Actinomarinales	uncultured_bacterium
48a4fd057ba091377f57a523336a212f	3	0	6	0	0	0	0	0	0	0	0	4	Bacteria	Chloroflexi	Anaerolineae	Caldilineales	Caldilineaceae	uncultured	uncultured_bacterium
1e344e6ce3beabd2e457e671ecdff6da	2	0	0	5	2	4	0	0	0	0	0	0	Bacteria	Proteobacteria	Alphaproteobacteria	Rhodobacterales	Rhodobacteraceae	unidentified	unidentified
37e10757e10092e7193b4b40e32fde32	1	0	0	0	0	0	0	0	0	5	7	0	Bacteria	Acidobacteriota	Holophagae	Subgroup_7	Subgroup_7	Subgroup_7	unidentified
2a8caa81df6a7c3b84389274b972134e	0	7	0	0	0	0	0	0	6	0	0	0	Bacteria	Actinobacteriota	Actinobacteria	unidentified	unidentified	unidentified	unidentified
6ce68b534900f5c2e9d12b4203001ceb	0	5	0	0	0	2	0	0	0	0	0	6	Bacteria	Actinobacteriota	Actinobacteria	Corynebacteriales	Nocardiaceae	Rhodococcus	unidentified
9dfb5370aca24d3c3b03d410d4709b4b	0	0	8	0	0	0	5	0	0	0	0	0	Bacteria	Proteobacteria	Alphaproteobacteria	Sphingomonadales	Sphingomonadaceae	Novosphingobium	unidentified
c99be701ca7c586f3b04983d716899d0	0	0	7	0	0	0	0	0	6	0	0	0	Bacteria	Chloroflexi	KD4-96	KD4-96	KD4-96	KD4-96	uncultured_bacterium
c6af6f39c432d3849a099afade25ecd8	0	0	7	0	0	0	0	0	0	6	0	0	Bacteria	Chloroflexi	Chloroflexia	Thermomicrobiales	AKYG1722	AKYG1722	uncultured_soil
652c2c549b8c2fa698258e35b7e54aed	0	0	5	0	0	0	0	0	0	3	0	5	Bacteria	Proteobacteria	Alphaproteobacteria	Rhodobacterales	Rhodobacteraceae	Pseudorhodobacter	unidentified
e16a7c4103be0378e534b949c8fb91ba	0	0	0	6	0	0	0	0	7	0	0	0	Bacteria	Actinobacteriota	Actinobacteria	Streptomycetales	Streptomycetaceae	Streptomyces	unidentified
680639b2814d8438dad7dd86f264561a	0	0	0	6	0	0	0	0	0	7	0	0	Bacteria	Actinobacteriota	Actinobacteria	Corynebacteriales	Nocardiaceae	Rhodococcus	unidentified
919c06d489877a38ac9e6a8c8571f607	0	0	0	0	7	0	0	0	0	0	0	6	Bacteria	Acidobacteriota	Blastocatellia	Blastocatellales	Blastocatellaceae	Blastocatella	unidentified
6146900927cb39fdccdcde4a68fd4023	0	0	0	0	0	0	7	0	0	0	6	0	Bacteria	Chloroflexi	Anaerolineae	Ardenticatenales	uncultured	uncultured	unidentified
56e04d48ba0d4977d3adea1c8fb9c6ee	0	0	0	0	0	0	5	0	8	0	0	0	Bacteria	Planctomycetota	Planctomycetes	Pirellulales	Pirellulaceae	Pirellula	unidentified
f85b59204b53c2a188d4d1a59458de7d	0	0	0	0	0	0	0	6	7	0	0	0	Bacteria	Actinobacteriota	Acidimicrobiia	IMCC26256	IMCC26256	IMCC26256	uncultured_bacterium
b01cbd2670580b9801a016297ead1ace	6	0	0	0	0	0	6	0	0	0	0	0	Bacteria	Actinobacteriota	Acidimicrobiia	Microtrichales	uncultured	uncultured	uncultured_Acidimicrobiia
0a5e0dbedc8e5c51f7d37dff804b67f4	6	0	0	0	4	0	0	0	0	2	0	0	Bacteria	Gemmatimonadota	Gemmatimonadetes	Gemmatimonadales	Gemmatimonadaceae	unidentified	unidentified
295d3c87c9e06ef5a616e686d7e3a72a	6	0	0	0	0	0	0	0	0	6	0	0	Bacteria	Verrucomicrobiota	Verrucomicrobiae	Chthoniobacterales	Xiphinematobacteraceae	Candidatus_Xiphinematobacter	uncultured_bacterium
9d4ea2166e00d0a34d1c6b80ef9e4e12	5	0	0	0	0	0	0	0	0	0	0	7	Bacteria	Actinobacteriota	Actinobacteria	Kineosporiales	Kineosporiaceae	Kineococcus	uncultured_bacterium
ed4268d04ff80d49ec188bb159b10b86	4	0	0	0	0	0	0	0	8	0	0	0	Bacteria	Armatimonadota	uncultured	uncultured	uncultured	uncultured	uncultured_bacterium
372d99f3a55122a43e6669a16349a994	4	0	8	0	0	0	0	0	0	0	0	0	Bacteria	Chloroflexi	TK10	TK10	TK10	TK10	unidentified
101e195bcce4431203616f604db56944	3	0	0	0	4	0	0	1	4	0	0	0	Bacteria	Chloroflexi	Chloroflexia	Chloroflexales	Roseiflexaceae	uncultured	uncultured_bacterium
92b1e067e67252f7ec9ec7aee23c83ce	3	9	0	0	0	0	0	0	0	0	0	0	Bacteria	Proteobacteria	Gammaproteobacteria	Burkholderiales	Comamonadaceae	Pelomonas	unidentified
a20d4fd38c009f202b4b26eef21ae05d	0	5	0	0	0	0	0	0	7	0	0	0	Bacteria	Actinobacteriota	Actinobacteria	Propionibacteriales	Nocardioidaceae	Nocardioides	unidentified
c2ff8a34ed46d753aec08480debf0682	0	0	6	0	0	0	0	0	0	0	6	0	Bacteria	Actinobacteriota	Actinobacteria	Kineosporiales	Kineosporiaceae	Angustibacter	Angustibacter_luteus
b41b06f88df354d1b0d46d2ea32fc5e7	0	0	5	0	0	0	0	5	2	0	0	0	Bacteria	Firmicutes	Clostridia	Lachnospirales	Lachnospiraceae	Herbinix	Herbinix_luporum
d9cde8873c5d2adfad67893440f01e3e	0	0	0	0	9	0	0	0	0	0	3	0	Bacteria	Actinobacteriota	Acidimicrobiia	Microtrichales	uncultured	uncultured	uncultured_Acidimicrobiia
54fc900ca2f764eac2fdd8a6b54cfb72	0	0	0	0	0	0	8	0	0	0	4	0	Bacteria	Gemmatimonadota	Gemmatimonadetes	Gemmatimonadales	Gemmatimonadaceae	unidentified	unidentified
80ac5a03a6d00c064368c60052bce88f	0	0	0	0	0	0	0	0	9	0	0	3	Bacteria	Armatimonadota	Chthonomonadetes	Chthonomonadales	Chthonomonadaceae	Chthonomonas	uncultured_bacterium
09a834df416ef66d160c4141a73d7243	8	0	0	0	0	0	3	0	0	0	0	0	Bacteria	Armatimonadota	uncultured	uncultured	uncultured	uncultured	uncultured_bacterium
7ca6ab7c75312925967572b17e77db40	6	0	0	5	0	0	0	0	0	0	0	0	Bacteria	Planctomycetota	Phycisphaerae	Tepidisphaerales	WD2101_soil_group	WD2101_soil_group	uncultured_bacterium
972f935140108b34dc5bdccf62338fce	6	5	0	0	0	0	0	0	0	0	0	0	Bacteria	Bacteroidota	Kapabacteria	Kapabacteriales	Kapabacteriales	Kapabacteriales	uncultured_bacterium
c6397d8e6f4e6ac1006e10bb8384c07a	5	0	0	0	0	6	0	0	0	0	0	0	Bacteria	Armatimonadota	Chthonomonadetes	Chthonomonadales	Chthonomonadaceae	Chthonomonas	uncultured_bacterium
506f6339026167595adc04be5f8d8dca	5	0	0	0	0	0	0	0	6	0	0	0	Bacteria	Chloroflexi	Anaerolineae	SBR1031	SBR1031	SBR1031	wastewater_metagenome
044e2430fbcfb0186782bacb2f3dd7ae	3	0	0	0	0	5	0	0	3	0	0	0	Bacteria	Chloroflexi	Chloroflexia	Chloroflexales	Roseiflexaceae	uncultured	uncultured_bacterium
96b795d27f826d07d255c06bd21b1ff8	2	0	0	3	0	3	0	0	3	0	0	0	Bacteria	Armatimonadota	Armatimonadia	Armatimonadales	Armatimonadales	Armatimonadales	uncultured_bacterium
cb4a8b32caa1654000a9be7ac9df0651	0	6	0	5	0	0	0	0	0	0	0	0	Bacteria	Proteobacteria	Alphaproteobacteria	Rhizobiales	uncultured	uncultured	uncultured_soil
5b0c8b76ee4bcc34af55a4b1cd043eb9	0	0	4	0	0	0	0	0	7	0	0	0	Bacteria	Proteobacteria	Alphaproteobacteria	Rhizobiales	Devosiaceae	Devosia	unidentified
e0e6e504805b3ea677eaf5a6d8a3d0be	0	0	4	0	0	0	0	0	0	0	7	0	Bacteria	Proteobacteria	Alphaproteobacteria	Rickettsiales	Mitochondria	Mitochondria	uncultured_bacterium
59097e3785e5f6d79a41e90c3b49a111	0	0	4	0	0	1	2	0	4	0	0	0	Bacteria	Bacteroidota	Bacteroidia	Flavobacteriales	Flavobacteriaceae	Flavobacterium	unidentified
6fd1e9760065bae028f350c946fa0be3	0	0	0	4	1	0	0	6	0	0	0	0	Bacteria	Bdellovibrionota	Bdellovibrionia	Bdellovibrionales	Bdellovibrionaceae	OM27_clade	uncultured_bacterium
8368b1dbf063896068172dbddd69f6a7	0	0	0	2	6	0	0	3	0	0	0	0	Bacteria	Gemmatimonadota	Gemmatimonadetes	Gemmatimonadales	Gemmatimonadaceae	unidentified	unidentified
ac60096437dcb0a16daf7b3fc6ac7b1e	0	0	0	1	0	0	0	1	0	0	9	0	Bacteria	Cyanobacteria	Cyanobacteriia	Chloroplast	Chloroplast	Chloroplast	unidentified
4d23e66102dad1d1f778f15575de662e	0	0	0	0	0	7	0	0	0	4	0	0	Bacteria	Actinobacteriota	Actinobacteria	unidentified	unidentified	unidentified	unidentified
2d5f3e416177a069f5d5c562a8bf60f5	0	0	0	0	0	6	0	0	5	0	0	0	Bacteria	Planctomycetota	Phycisphaerae	Tepidisphaerales	WD2101_soil_group	WD2101_soil_group	uncultured_bacterium
f1bc9b911d2e30f98c8f7074eb9d1b8d	0	0	0	0	0	6	0	0	5	0	0	0	Bacteria	Actinobacteriota	Acidimicrobiia	Microtrichales	Ilumatobacteraceae	uncultured	uncultured_Acidimicrobiaceae
c67c7254c98f011cb1e2032939ae3292	0	0	0	0	0	5	0	0	0	0	0	6	Bacteria	Proteobacteria	Alphaproteobacteria	Rhizobiales	Rhizobiaceae	Phyllobacterium	unidentified
bed77bd113fd38a2de45841bd31e3921	0	0	0	0	0	0	3	0	4	0	4	0	Bacteria	Chloroflexi	Chloroflexia	Chloroflexales	Roseiflexaceae	uncultured	uncultured_Chloroflexi
15e0429763da1659f29ad9cac5748b01	0	0	0	0	0	0	0	6	0	5	0	0	Bacteria	Acidobacteriota	Subgroup_18	Subgroup_18	Subgroup_18	Subgroup_18	uncultured_bacterium
749ea43255159762ce3f0d936c465d5c	9	0	0	0	0	0	1	0	0	0	0	0	Bacteria	Proteobacteria	Alphaproteobacteria	Rhizobiales	Beijerinckiaceae	alphaI_cluster	uncultured_bacterium
0791c6a3997601a78efc51a37f7adf85	5	0	0	5	0	0	0	0	0	0	0	0	Bacteria	Actinobacteriota	Actinobacteria	Micrococcales	Intrasporangiaceae	unidentified	unidentified
f26f2aef3653a1ccd2129ee12ebd950a	4	6	0	0	0	0	0	0	0	0	0	0	Bacteria	Cyanobacteria	Sericytochromatia	Sericytochromatia	Sericytochromatia	Sericytochromatia	uncultured_bacterium
08cdc4316c0f959f7ed50fdfa5bd68e7	4	0	0	0	0	0	0	6	0	0	0	0	Bacteria	Actinobacteriota	Actinobacteria	Streptomycetales	Streptomycetaceae	Streptomyces	unidentified
6beb543af974f3726be17339837494b7	2	2	0	1	0	0	0	0	4	0	1	0	Bacteria	Actinobacteriota	Actinobacteria	Propionibacteriales	Nocardioidaceae	Nocardioides	unidentified
9cbaabccf06935d2de5162333b7596d3	0	4	0	0	0	0	0	0	2	0	0	4	Bacteria	Gemmatimonadota	Gemmatimonadetes	Gemmatimonadales	Gemmatimonadaceae	Gemmatimonas	unidentified
02e0b0bfbd3921f3940f3c6958f0edd1	0	4	0	0	0	0	0	5	0	1	0	0	Bacteria	Bacteroidota	Bacteroidia	Chitinophagales	Saprospiraceae	uncultured	unidentified
5bdfe4a213c94978e24a1ff63b9765b5	0	3	0	0	0	0	0	7	0	0	0	0	Bacteria	Chloroflexi	Chloroflexia	Chloroflexales	Roseiflexaceae	uncultured	uncultured_bacterium
d51765515d26e9e54d0a97aaa3e394d6	0	3	2	0	0	0	1	0	0	0	4	0	Bacteria	Acidobacteriota	Blastocatellia	Blastocatellales	Blastocatellaceae	unidentified	unidentified
36a0972f81133d81c60da54ee5c17cac	0	2	7	0	0	0	0	0	1	0	0	0	Bacteria	Actinobacteriota	Actinobacteria	Propionibacteriales	Nocardioidaceae	Nocardioides	unidentified
226e12cd7e128cdeba82af0af4b77ee4	0	0	7	0	3	0	0	0	0	0	0	0	Bacteria	Planctomycetota	Phycisphaerae	Tepidisphaerales	WD2101_soil_group	WD2101_soil_group	unidentified
f08f052dbfa6a9d4b801f481815d2d7a	0	0	6	0	4	0	0	0	0	0	0	0	Bacteria	Proteobacteria	Alphaproteobacteria	Rhizobiales	Hyphomicrobiaceae	Pedomicrobium	unidentified
71c6989829d7896bf76d0978714eedb0	0	0	2	0	0	0	0	0	0	1	3	4	Bacteria	Actinobacteriota	Actinobacteria	unidentified	unidentified	unidentified	unidentified
4caf757c9eb0f99fdeca0deb76f197a6	0	0	0	5	0	0	0	0	5	0	0	0	Bacteria	Acidobacteriota	Blastocatellia	Blastocatellales	Blastocatellaceae	uncultured	unidentified
479fbf1241595782a373c570b85c9923	0	0	0	0	4	0	0	0	0	0	6	0	Bacteria	Actinobacteriota	Actinobacteria	unidentified	unidentified	unidentified	unidentified
9cdd2f933c9d9421528e9801cc1033b6	0	0	0	0	4	0	6	0	0	0	0	0	Bacteria	Armatimonadota	Fimbriimonadia	Fimbriimonadales	Fimbriimonadaceae	Fimbriimonadaceae	metagenome
3377eccbd96e9fc849d2dd2c01a07605	0	0	0	0	0	6	4	0	0	0	0	0	Bacteria	Planctomycetota	Phycisphaerae	Tepidisphaerales	WD2101_soil_group	WD2101_soil_group	unidentified
cddd772c0e30d7fc2eb3f940eec3f9a9	0	0	0	0	0	4	6	0	0	0	0	0	Bacteria	Actinobacteriota	Acidimicrobiia	Microtrichales	Ilumatobacteraceae	uncultured	uncultured_bacterium
4a8340e5e353a1dfeb2012abeb311065	0	0	0	0	0	0	0	7	0	0	3	0	Bacteria	Bacteroidota	Bacteroidia	Cytophagales	uncultured	uncultured	Hymenobacter_sp.
077d092c7fc8fc5a1722a8f2e54f8179	0	0	0	0	0	0	0	0	5	0	5	0	Bacteria	Planctomycetota	Planctomycetes	Pirellulales	Pirellulaceae	Pir4_lineage	uncultured_soil
5e898f4529a8f32b52514e8dd83a007a	0	0	0	0	0	0	0	0	3	0	7	0	Bacteria	Firmicutes	Clostridia	Clostridiales	Clostridiaceae	unidentified	unidentified
bb10fe4b8dfe8b815811d2fb943bf422	0	0	0	0	0	0	0	0	0	8	2	0	Bacteria	Actinobacteriota	MB-A2-108	MB-A2-108	MB-A2-108	MB-A2-108	uncultured_actinobacterium
190317b86bd2e478e134ad7cd8f458b7	7	0	0	0	0	0	0	0	2	0	0	0	Bacteria	Proteobacteria	Alphaproteobacteria	Sphingomonadales	Sphingomonadaceae	unidentified	unidentified
b5892878e9927a915ef9cc3165edc6db	7	0	0	0	1	0	0	0	1	0	0	0	Bacteria	Actinobacteriota	Actinobacteria	Micromonosporales	Micromonosporaceae	Virgisporangium	unidentified
b7025f7f145ca3f33a335bb3fd0f4aac	6	0	0	0	0	0	0	3	0	0	0	0	Bacteria	Actinobacteriota	Actinobacteria	Streptomycetales	Streptomycetaceae	Streptomyces	unidentified
d49252f770dbaa0c996007c7c6a30678	5	0	0	0	0	4	0	0	0	0	0	0	Bacteria	Bacteroidota	Kapabacteria	Kapabacteriales	Kapabacteriales	Kapabacteriales	unidentified
71c7a937c8f72e35b27acaac16d66a38	1	0	3	0	3	2	0	0	0	0	0	0	Bacteria	Planctomycetota	Phycisphaerae	Tepidisphaerales	WD2101_soil_group	WD2101_soil_group	unidentified
d8aa5516f0e5569b192d5150437f3a45	0	6	0	0	0	0	3	0	0	0	0	0	Bacteria	Planctomycetota	Phycisphaerae	Tepidisphaerales	WD2101_soil_group	WD2101_soil_group	unidentified
27cf96c4225557c78b6b4d0bb0ba317c	0	2	3	0	1	0	2	1	0	0	0	0	Bacteria	Acidobacteriota	Blastocatellia	11-24	11-24	11-24	uncultured_bacterium
8c8d40a544d93601572628e32406b67d	0	0	5	0	0	0	0	4	0	0	0	0	Bacteria	Actinobacteriota	Actinobacteria	Propionibacteriales	Nocardioidaceae	Marmoricola	uncultured_bacterium
e95fdfe9dad64de5f4dcf8ff33fc7a0c	0	0	0	6	0	0	3	0	0	0	0	0	Bacteria	Acidobacteriota	Subgroup_5	Subgroup_5	Subgroup_5	Subgroup_5	uncultured_bacterium
9f6afb139d91be1e8950d31c9aee462b	0	0	0	5	0	0	0	4	0	0	0	0	Bacteria	Armatimonadota	uncultured	uncultured	uncultured	uncultured	uncultured_bacterium
89402d159dce3f1d94adf0edc0ff48fd	0	0	0	3	0	6	0	0	0	0	0	0	Bacteria	Proteobacteria	Alphaproteobacteria	Rhodobacterales	Rhodobacteraceae	Pseudorhodobacter	unidentified
31d1f7566a00a631a86172bfb0859307	0	0	0	3	3	0	0	0	3	0	0	0	Bacteria	Armatimonadota	Chthonomonadetes	Chthonomonadales	Chthonomonadaceae	Chthonomonas	uncultured_bacterium
5aef506da561fb3c1b3de5f549f944f0	0	0	0	2	0	0	0	6	1	0	0	0	Bacteria	Cyanobacteria	Cyanobacteriia	Cyanobacteriales	Nostocaceae	Anabaena_PCC-7122	unidentified
ce8bf69fa298c6127725dcfb35422625	0	0	0	2	6	0	0	1	0	0	0	0	Bacteria	Bdellovibrionota	Bdellovibrionia	Bdellovibrionales	Bdellovibrionaceae	OM27_clade	uncultured_bacterium
2f0c2abb8b5a490890716d549b3e87f3	0	0	0	0	5	4	0	0	0	0	0	0	Bacteria	Actinobacteriota	Actinobacteria	Streptomycetales	Streptomycetaceae	E1B-B3-114	uncultured_actinobacterium
7a94469a813219885e6aa582eded3615	5	0	0	0	0	0	0	0	0	0	0	3	Bacteria	Bacteroidota	Bacteroidia	Cytophagales	Cyclobacteriaceae	uncultured	uncultured_Bacteroidetes
86df2c0708526eb36932fb71619d52eb	1	0	0	0	0	0	0	0	3	3	1	0	Bacteria	Acidobacteriota	Blastocatellia	Blastocatellales	Blastocatellaceae	Blastocatella	unidentified
d25f033cd0bf53faecf2f5a8df53eb39	1	0	2	0	0	0	0	1	2	0	1	1	Bacteria	Proteobacteria	Gammaproteobacteria	Xanthomonadales	Xanthomonadaceae	unidentified	unidentified
2f4a241e17479d6d39ad8d988297aee3	1	1	0	0	2	0	0	0	0	2	1	1	Bacteria	Proteobacteria	Gammaproteobacteria	Xanthomonadales	Xanthomonadaceae	unidentified	unidentified
ca26eec9fe355b1154a5d6f4b7867218	0	7	0	0	0	0	1	0	0	0	0	0	Bacteria	Acidobacteriota	Holophagae	Subgroup_7	Subgroup_7	Subgroup_7	uncultured_soil
f9df6c7d291f9ffc39d3ccc80bb48734	0	0	6	0	0	0	0	0	0	0	2	0	Bacteria	Actinobacteriota	Acidimicrobiia	IMCC26256	IMCC26256	IMCC26256	unidentified
c840f9878fb46a61ce7ea363439db6dc	0	0	2	0	0	0	6	0	0	0	0	0	Bacteria	Chloroflexi	Anaerolineae	SBR1031	SBR1031	SBR1031	uncultured_bacterium
5d6948a12221567fa81cc404e787dfd4	0	0	0	2	3	0	0	3	0	0	0	0	Bacteria	Gemmatimonadota	Gemmatimonadetes	Gemmatimonadales	Gemmatimonadaceae	unidentified	unidentified
89465c2226d327c01f6c97a8a626ddc2	0	0	0	0	5	0	0	0	0	0	0	3	Bacteria	Bacteroidota	Bacteroidia	Cytophagales	Cytophagaceae	Rhodocytophaga	uncultured_bacterium
c188a8ea9c4336e299b7b54171725215	0	0	0	0	0	3	0	0	5	0	0	0	Bacteria	Actinobacteriota	Actinobacteria	unidentified	unidentified	unidentified	unidentified
b079c3da86a8510c13f4de889e1f972f	0	0	0	0	0	0	4	0	0	4	0	0	Bacteria	Gemmatimonadota	Gemmatimonadetes	Gemmatimonadales	Gemmatimonadaceae	unidentified	unidentified
5282a739d1b6675d7d6125756bfd6963	0	0	0	0	0	0	2	0	0	0	0	6	Bacteria	Actinobacteriota	Acidimicrobiia	Microtrichales	unidentified	unidentified	unidentified
3c02953bf81c89c38573cf3b6e4a8bec	0	0	0	0	0	0	0	0	0	4	4	0	Bacteria	Cyanobacteria	Sericytochromatia	Sericytochromatia	Sericytochromatia	Sericytochromatia	uncultured_bacterium
4e848c7b259c5253fc708dc69ce2506d	4	3	0	0	0	0	0	0	0	0	0	0	Bacteria	Actinobacteriota	Actinobacteria	Micrococcales	Microbacteriaceae	Pseudoclavibacter	Pseudoclavibacter_helvolus
ef3844f7770db5db71b23048c6248404	4	0	0	0	3	0	0	0	0	0	0	0	Bacteria	Gemmatimonadota	Gemmatimonadetes	Gemmatimonadales	Gemmatimonadaceae	Roseisolibacter	Roseisolibacter_agri
dcda1d15b65afc5da75ae1d06ede58cd	3	0	0	4	0	0	0	0	0	0	0	0	Bacteria	Planctomycetota	Planctomycetes	Pirellulales	Pirellulaceae	Pir4_lineage	unidentified
fd1dd64f1185add589bae1bac9b59cc8	3	0	0	0	0	0	0	0	0	4	0	0	Bacteria	Proteobacteria	Alphaproteobacteria	Caulobacterales	Caulobacteraceae	uncultured	unidentified
2da7780767acaa36f6108ab6d4bae5ae	2	0	0	3	2	0	0	0	0	0	0	0	Bacteria	Gemmatimonadota	Gemmatimonadetes	Gemmatimonadales	Gemmatimonadaceae	Gemmatimonas	unidentified
dd2fa784e1b7c63d2b005d97be95831b	2	0	2	0	0	0	0	1	0	0	2	0	Bacteria	Actinobacteriota	Actinobacteria	Frankiales	Nakamurellaceae	Nakamurella	unidentified
30761327386ef442b84620330f9fd1c7	0	0	1	1	0	0	0	3	0	0	0	2	Bacteria	Bacteroidota	Bacteroidia	Chitinophagales	Saprospiraceae	uncultured	uncultured_soil
f8c07b52d471ca1c10cbfc862b630463	0	0	0	2	0	5	0	0	0	0	0	0	Bacteria	Chloroflexi	Chloroflexia	Thermomicrobiales	JG30-KF-CM45	JG30-KF-CM45	uncultured_bacterium
fd95aab2c22cc8394437e867d4f3e3b9	0	0	0	0	3	0	4	0	0	0	0	0	Bacteria	Acidobacteriota	Acidobacteriae	Acidobacteriales	unidentified	unidentified	unidentified
ec0f7af7ab6b9a92c9e47545e82a4e3d	0	0	0	0	1	0	0	0	0	0	0	6	Bacteria	Actinobacteriota	Actinobacteria	PeM15	PeM15	PeM15	uncultured_soil
74d28396a3ae3ef929aab374c51edec7	0	0	0	0	0	0	3	4	0	0	0	0	Bacteria	Gemmatimonadota	Gemmatimonadetes	Gemmatimonadales	Gemmatimonadaceae	uncultured	unidentified
be180294e2134eff0dec4af61967fd8e	0	0	0	0	0	0	0	0	2	5	0	0	Bacteria	Bacteroidota	Bacteroidia	Cytophagales	Cyclobacteriaceae	uncultured	metagenome
9a2c8d164eb8efeee7f173d071bb32a2	0	0	0	0	0	0	0	0	0	3	4	0	Bacteria	Chloroflexi	Anaerolineae	SBR1031	A4b	A4b	uncultured_bacterium
8453f56469179d0509c36780228b0c9a	0	0	4	0	0	0	0	0	0	0	2	0	Bacteria	Bacteroidota	Bacteroidia	Cytophagales	Cyclobacteriaceae	uncultured	uncultured_Bacteroidetes
c5e702bae27784f5a8f919ac0babb0a9	0	0	4	0	0	0	0	2	0	0	0	0	Bacteria	Patescibacteria	uncultured	uncultured	uncultured	uncultured	uncultured_bacterium
b11e3ff4f78c4bb29956d6b7e04ca550	0	0	2	0	0	0	0	0	0	4	0	0	Bacteria	Actinobacteriota	Actinobacteria	Streptomycetales	Streptomycetaceae	Streptomyces	unidentified
a22a32ee349ae491c12401d5c4a1af2f	0	0	1	0	0	0	2	3	0	0	0	0	Bacteria	Actinobacteriota	Acidimicrobiia	Microtrichales	Iamiaceae	Iamia	unidentified
3a91deb67e76e0cbc35948d18d770293	0	0	0	3	0	0	0	0	0	3	0	0	Bacteria	Patescibacteria	Saccharimonadia	Saccharimonadales	Saccharimonadales	Saccharimonadales	unidentified
ae593188a033d78204a5d06037937289	0	0	0	2	3	0	0	0	1	0	0	0	Bacteria	Gemmatimonadota	Gemmatimonadetes	Gemmatimonadales	Gemmatimonadaceae	unidentified	unidentified
37af26899b195e265bfba933803dbc23	0	0	0	0	3	0	0	0	3	0	0	0	Bacteria	Actinobacteriota	Acidimicrobiia	Microtrichales	Ilumatobacteraceae	uncultured	uncultured_Acidimicrobiales
713a3c42fe5b4450c28186f2f135a9c7	0	0	0	0	0	2	0	0	0	0	4	0	Bacteria	Planctomycetota	Planctomycetes	Pirellulales	Pirellulaceae	Pir4_lineage	uncultured_Planctomycetaceae
e5e346cc4daf376a1a6fc3672991690f	0	0	0	0	0	2	0	4	0	0	0	0	Bacteria	Chloroflexi	Ktedonobacteria	C0119	C0119	C0119	uncultured_bacterium
6dfcd97948f111760e9622c8f9d8632d	0	0	0	0	0	1	1	0	0	0	3	1	Bacteria	Proteobacteria	Gammaproteobacteria	Xanthomonadales	Xanthomonadaceae	Lysobacter	unidentified
900fb0eeda4f8aa963049938b359503f	0	0	0	0	0	1	0	0	5	0	0	0	Bacteria	Acidobacteriota	Blastocatellia	11-24	11-24	11-24	uncultured_bacterium
41a8c325b26292d6c14acd18acdbb2c7	0	0	0	0	0	0	3	0	2	1	0	0	Bacteria	Planctomycetota	Phycisphaerae	Tepidisphaerales	WD2101_soil_group	WD2101_soil_group	uncultured_bacterium
00bf78da19fcf69d7f563bf65af3eb55	0	2	0	0	0	3	0	0	0	0	0	0	Bacteria	Actinobacteriota	Actinobacteria	Frankiales	Nakamurellaceae	Nakamurella	unidentified
6fe5d4ed8776c705957ddcfb6a4d4d8c	0	2	0	1	0	0	0	0	0	2	0	0	Bacteria	Planctomycetota	Phycisphaerae	Tepidisphaerales	WD2101_soil_group	WD2101_soil_group	uncultured_bacterium
81f5cec57b7af79d4de36c1f81f12759	0	1	2	0	1	0	0	0	0	0	1	0	Bacteria	Proteobacteria	Gammaproteobacteria	Xanthomonadales	Xanthomonadaceae	Lysobacter	unidentified
26fad7f80642e20e27be59e9e2d44522	0	0	2	0	0	0	0	0	0	0	3	0	Bacteria	Proteobacteria	Alphaproteobacteria	Sphingomonadales	Sphingomonadaceae	uncultured	uncultured_Porphyrobacter
422fc99c761086d2bc37f4af29e6785e	0	0	0	4	0	1	0	0	0	0	0	0	Bacteria	Actinobacteriota	Acidimicrobiia	IMCC26256	IMCC26256	IMCC26256	unidentified
ad5224e489f8f6c736c8e5b5cf9e4253	0	0	0	2	2	0	0	0	0	0	1	0	Bacteria	Proteobacteria	Gammaproteobacteria	Burkholderiales	Comamonadaceae	Pelomonas	unidentified
e6a3e26cd327ace9eae1a2e78bc10e9f	0	0	0	0	1	3	0	0	0	0	1	0	Bacteria	Bacteroidota	Bacteroidia	Chitinophagales	Saprospiraceae	uncultured	unidentified
21c9cd1c979a1c29e74655e933ddae23	0	0	0	0	0	2	0	0	0	3	0	0	Bacteria	Bacteroidota	Bacteroidia	Chitinophagales	Saprospiraceae	uncultured	uncultured_Devosia
d23722e2bcea6e830490e31544dbee54	0	0	0	0	0	0	0	0	3	2	0	0	Bacteria	Actinobacteriota	Acidimicrobiia	IMCC26256	IMCC26256	IMCC26256	unidentified
a168545702da58642220746929a1610f	3	0	0	1	0	0	0	0	0	0	0	0	Bacteria	Proteobacteria	Gammaproteobacteria	Burkholderiales	Comamonadaceae	Pelomonas	unidentified
991ab858b672d8829aca8d242325dbd3	2	0	0	0	0	0	0	0	0	0	2	0	Bacteria	Proteobacteria	Gammaproteobacteria	Burkholderiales	Comamonadaceae	Pelomonas	unidentified
cf8e79874868716d40b9e4b235b00f84	2	2	0	0	0	0	0	0	0	0	0	0	Bacteria	Proteobacteria	Gammaproteobacteria	Burkholderiales	Comamonadaceae	Pelomonas	unidentified
220181e20e656ec32994dae2624e83d3	0	2	0	0	0	0	1	0	0	0	0	1	Bacteria	Proteobacteria	Alphaproteobacteria	Sphingomonadales	Sphingomonadaceae	uncultured	uncultured_Porphyrobacter
af8ed5adf93b7c43f5e8fcca97d10a5a	0	0	1	0	0	0	0	2	0	0	0	1	Bacteria	Proteobacteria	Alphaproteobacteria	unidentified	unidentified	unidentified	unidentified
c3a564cc5dfd67981ecceb682ef35cab	0	0	1	0	0	0	1	0	0	0	2	0	Bacteria	Proteobacteria	Gammaproteobacteria	Xanthomonadales	Xanthomonadaceae	Lysobacter	unidentified
9d02cfb1d39104292476512b1bc0b9fa	0	0	0	2	0	0	0	0	0	0	1	1	Bacteria	Proteobacteria	Gammaproteobacteria	Xanthomonadales	unidentified	unidentified	unidentified
bb65aa847f5a1671bbe63cd121bb3293	0	0	0	2	0	2	0	0	0	0	0	0	Bacteria	Armatimonadota	Chthonomonadetes	Chthonomonadales	Chthonomonadaceae	Chthonomonas	uncultured_bacterium
f271c36ae40cd53344c455b0bb00b1e6	0	0	0	1	0	0	1	2	0	0	0	0	Bacteria	Cyanobacteria	Cyanobacteriia	Chloroplast	Chloroplast	Chloroplast	Chlamydomonas_asymmetrica
ac95a39f0421f70e5bc8cc578054e65c	0	0	0	1	0	1	0	1	0	1	0	0	Bacteria	Proteobacteria	Gammaproteobacteria	Xanthomonadales	Xanthomonadaceae	Lysobacter	unidentified
dff99214874362cf75330fc9eecb7336	0	0	0	0	2	1	1	0	0	0	0	0	Bacteria	Proteobacteria	Gammaproteobacteria	Xanthomonadales	Xanthomonadaceae	unidentified	unidentified
26263d794348fd7cd17b3bd8633e479a	0	0	0	0	1	0	0	1	1	0	1	0	Bacteria	Actinobacteriota	Actinobacteria	Propionibacteriales	Nocardioidaceae	Nocardioides	unidentified
5074e30c9d95d06ed65f5682e8e66f29	0	0	0	0	0	2	0	0	0	0	0	2	Bacteria	Bacteroidota	Bacteroidia	Cytophagales	Hymenobacteraceae	Adhaeribacter	unidentified
24feda5950b1e1e40577a85e7c061d35	2	1	0	0	0	0	0	0	0	0	0	0	Bacteria	Bacteroidota	Bacteroidia	Flavobacteriales	Flavobacteriaceae	Flavobacterium	unidentified
09e0db1058f6a0f42a7950c0d57e1c83	1	1	1	0	0	0	0	0	0	0	0	0	Bacteria	Proteobacteria	Gammaproteobacteria	Xanthomonadales	Xanthomonadaceae	unidentified	unidentified
f10b93aeb45af6299a36168530c78ac8	1	0	0	0	1	0	1	0	0	0	0	0	Bacteria	Actinobacteriota	Actinobacteria	unidentified	unidentified	unidentified	unidentified
a8119470e9bb0d14a41cd07d9650f7be	1	0	1	0	0	0	0	0	0	0	0	1	Bacteria	Proteobacteria	Gammaproteobacteria	Gammaproteobacteria_Incertae_Sedis	Unknown_Family	Acidibacter	unidentified
ca652716cfd84a88352dfdd564b0832c	0	1	1	0	0	0	1	0	0	0	0	0	Bacteria	Proteobacteria	Gammaproteobacteria	Gammaproteobacteria_Incertae_Sedis	Unknown_Family	Acidibacter	unidentified
7c11be971e4e6cfc60fd94a66d93fa04	0	1	2	0	0	0	0	0	0	0	0	0	Bacteria	Bacteroidota	Bacteroidia	Flavobacteriales	Flavobacteriaceae	Flavobacterium	uncultured_Flavobacteriaceae
017bf13b68b8cb30d33907a367897276	0	0	1	0	0	0	0	0	1	0	1	0	Bacteria	unidentified	unidentified	unidentified	unidentified	unidentified	unidentified
194d81fee7e397a021ab925580143d74	0	0	1	0	0	0	0	2	0	0	0	0	Bacteria	Chloroflexi	Chloroflexia	Thermomicrobiales	JG30-KF-CM45	JG30-KF-CM45	uncultured_bacterium
3af9ffb5475778238e7f0e21fb00cf38	0	0	1	1	0	0	0	0	1	0	0	0	Bacteria	Proteobacteria	Gammaproteobacteria	Xanthomonadales	Xanthomonadaceae	Lysobacter	unidentified
7a892bfddde6f0ad921473b3d320819f	0	0	1	0	1	0	0	0	0	1	0	0	Bacteria	Actinobacteriota	Actinobacteria	Propionibacteriales	Nocardioidaceae	Nocardioides	unidentified
d896ec79f45d15fecbd220dd76223bdc	0	0	1	0	0	0	1	0	0	0	1	0	Bacteria	Proteobacteria	Gammaproteobacteria	Xanthomonadales	Xanthomonadaceae	unidentified	unidentified
d135807bdbf8338291eaa714380676ab	0	0	0	2	0	1	0	0	0	0	0	0	Bacteria	Acidobacteriota	Blastocatellia	unidentified	unidentified	unidentified	unidentified
f8533fca1720d66df8cd550df5f7cfb6	0	0	0	1	0	1	1	0	0	0	0	0	Bacteria	Proteobacteria	Alphaproteobacteria	Sphingomonadales	Sphingomonadaceae	uncultured	uncultured_Porphyrobacter
8a11a79bfc51b9832edef721225f57dd	0	0	0	0	1	0	0	0	0	1	0	1	Bacteria	Proteobacteria	Gammaproteobacteria	Xanthomonadales	Xanthomonadaceae	Lysobacter	unidentified
f7007ff48f1bdef568e66b911bc7e6fa	0	0	0	0	1	0	0	0	0	0	0	2	Bacteria	Actinobacteriota	Actinobacteria	Frankiales	Nakamurellaceae	Nakamurella	unidentified
285d43dfc976d6aba835dfa925055154	0	0	0	0	1	0	0	0	1	0	0	1	Bacteria	Proteobacteria	Gammaproteobacteria	Burkholderiales	SC-I-84	SC-I-84	unidentified
6f5ec8a01b5582f8b3b3894dfc4e1c4e	0	0	0	0	0	1	0	0	0	1	0	1	Bacteria	Proteobacteria	Gammaproteobacteria	Burkholderiales	SC-I-84	SC-I-84	uncultured_Nitrosomonadaceae
49505534045a10c3fcd9ec3450fe7a2a	0	0	0	0	0	1	0	0	1	0	1	0	Bacteria	Proteobacteria	Gammaproteobacteria	Burkholderiales	SC-I-84	SC-I-84	unidentified
f38565522683ed9894c3e3ab36b40fac	0	0	0	0	0	0	1	1	0	1	0	0	Bacteria	Bacteroidota	Bacteroidia	Flavobacteriales	Flavobacteriaceae	Flavobacterium	unidentified
8fe573fbe93d4b56df6c59388f197e3d	0	0	0	0	0	0	0	1	0	1	0	1	Bacteria	Actinobacteriota	Actinobacteria	Propionibacteriales	Nocardioidaceae	Nocardioides	uncultured_bacterium
297b5d77cee2702ee09565ca77fdf0fa	0	0	0	0	0	0	0	0	0	0	1	2	Bacteria	Proteobacteria	Gammaproteobacteria	Steroidobacterales	Steroidobacteraceae	uncultured	uncultured_bacterium
88f111cd1dbd1d6a02528184985e1dec	1	0	1	0	0	0	0	0	0	0	0	0	Bacteria	Proteobacteria	Alphaproteobacteria	Dongiales	Dongiaceae	Dongia	unidentified
7618718ded09f1304ba29ebe46d7d6d0	1	0	0	0	1	0	0	0	0	0	0	0	Bacteria	Proteobacteria	Gammaproteobacteria	Burkholderiales	Nitrosomonadaceae	MND1	unidentified
a2bc2d377a89ca609ac339f947ccc94b	1	0	0	0	0	0	0	0	0	0	1	0	Bacteria	Actinobacteriota	Actinobacteria	Propionibacteriales	Nocardioidaceae	Nocardioides	unidentified
06d2fe37c62ad4e16f657c7d576def4e	1	0	0	0	0	0	0	0	0	1	0	0	Bacteria	Proteobacteria	Gammaproteobacteria	Xanthomonadales	Xanthomonadaceae	unidentified	unidentified
f7a4cee8d3b543b4816c0498da1fae1b	1	0	0	1	0	0	0	0	0	0	0	0	Bacteria	Acidobacteriota	Holophagae	Subgroup_7	Subgroup_7	Subgroup_7	unidentified
56e0d07d25f13ee6bbd11c21786b3ff4	1	0	0	0	0	0	0	1	0	0	0	0	Bacteria	Cyanobacteria	Cyanobacteriia	Cyanobacteriales	Nostocaceae	Nostoc_PCC-7524	unidentified
02564feb39615c6debfd0ce7c68fac8f	0	1	0	0	0	0	0	0	0	0	1	0	Bacteria	Proteobacteria	Alphaproteobacteria	Rhizobiales	Beijerinckiaceae	Microvirga	unidentified
4bbe2966579742d6532bc58bbc2fbe85	0	1	0	0	0	0	0	0	0	0	0	1	Bacteria	Proteobacteria	Gammaproteobacteria	Burkholderiales	unidentified	unidentified	unidentified
e906a375f091c2e00bf16c061a7fab77	0	1	0	0	0	0	0	0	0	1	0	0	Bacteria	Proteobacteria	Gammaproteobacteria	Burkholderiales	SC-I-84	SC-I-84	uncultured_Nitrosomonadaceae
246ffc27d02b88603b14001cd412b891	0	1	0	1	0	0	0	0	0	0	0	0	Bacteria	Actinobacteriota	Actinobacteria	Propionibacteriales	Nocardioidaceae	Nocardioides	unidentified
071cc571029070d87b7d1db83470a63f	0	1	1	0	0	0	0	0	0	0	0	0	Bacteria	Proteobacteria	Alphaproteobacteria	Azospirillales	Azospirillaceae	Skermanella	uncultured_soil
3a16b4526469fc26a1f3110854169497	0	1	0	0	0	0	0	0	0	0	0	1	Bacteria	unidentified	unidentified	unidentified	unidentified	unidentified	unidentified
3717e2e4090c56212ef0997f2c4f9f11	0	1	0	0	1	0	0	0	0	0	0	0	Bacteria	Actinobacteriota	Actinobacteria	Propionibacteriales	Nocardioidaceae	Nocardioides	unidentified
c45e21e2d8b2ac162b5fa565d695e9ae	0	1	0	1	0	0	0	0	0	0	0	0	Bacteria	Proteobacteria	Gammaproteobacteria	Xanthomonadales	Xanthomonadaceae	unidentified	unidentified
62c9f3aeb40e5621fae52cbdce8b920b	0	0	1	0	0	1	0	0	0	0	0	0	Bacteria	Proteobacteria	Gammaproteobacteria	Burkholderiales	SC-I-84	SC-I-84	unidentified
c0f64f22c5a4360ffe72ccbfa0f4e7eb	0	0	1	0	0	1	0	0	0	0	0	0	Bacteria	Armatimonadota	Armatimonadia	Armatimonadales	Armatimonadales	Armatimonadales	unidentified
429f3ae3525ee55d6e227e1ba7de61c6	0	0	1	0	0	1	0	0	0	0	0	0	Bacteria	Gemmatimonadota	unidentified	unidentified	unidentified	unidentified	unidentified
18d27c6ff6da5781e34c3ac09bd32338	0	0	1	0	0	0	0	0	0	1	0	0	Bacteria	Proteobacteria	unidentified	unidentified	unidentified	unidentified	unidentified
684f8e7b015824c4b2232ff7bac8b6b7	0	0	1	0	0	0	1	0	0	0	0	0	Bacteria	Actinobacteriota	Thermoleophilia	Gaiellales	Gaiellaceae	Gaiella	uncultured_Rubrobacterineae
9b1c6a4e79535b26867f7b91b7a91682	0	0	1	0	0	0	0	0	1	0	0	0	Bacteria	Proteobacteria	Gammaproteobacteria	Cellvibrionales	Cellvibrionaceae	Cellvibrio	unidentified
ae7041f588a9e0e2011e7629df458dc5	0	0	1	0	0	0	0	0	0	1	0	0	Bacteria	Proteobacteria	Gammaproteobacteria	Xanthomonadales	Xanthomonadaceae	Lysobacter	uncultured_Xanthomonadaceae
ae63d9b40ee8b864d80b53ac6b274cdd	0	0	1	1	0	0	0	0	0	0	0	0	Bacteria	unidentified	unidentified	unidentified	unidentified	unidentified	unidentified
1727147f90d4a464ba9170d1d71e56bb	0	0	0	1	1	0	0	0	0	0	0	0	Bacteria	Proteobacteria	Alphaproteobacteria	Dongiales	Dongiaceae	Dongia	unidentified
80d25475e29b413c7c95c176264bac31	0	0	0	1	0	0	0	0	1	0	0	0	Bacteria	Actinobacteriota	Actinobacteria	unidentified	unidentified	unidentified	unidentified
55c66e146e8dfa64e4bdb26063e221ef	0	0	0	1	0	0	0	0	0	1	0	0	Bacteria	Proteobacteria	Gammaproteobacteria	Xanthomonadales	Xanthomonadaceae	Arenimonas	unidentified
dabc8c4e8a31e7effb3ee6c4283909f3	0	0	0	1	0	0	0	0	1	0	0	0	Bacteria	Proteobacteria	Gammaproteobacteria	Burkholderiales	unidentified	unidentified	unidentified
b7f046cfb24e86009bfebc23c863316d	0	0	0	1	0	0	1	0	0	0	0	0	Bacteria	unidentified	unidentified	unidentified	unidentified	unidentified	unidentified
42f7a745af4b4d4dfdbfa1ac7abe5751	0	0	0	0	1	1	0	0	0	0	0	0	Bacteria	Proteobacteria	Gammaproteobacteria	Burkholderiales	unidentified	unidentified	unidentified
e105d7cfb9b3602269ccad4ad08f6a87	0	0	0	0	1	1	0	0	0	0	0	0	Bacteria	Proteobacteria	Gammaproteobacteria	Burkholderiales	unidentified	unidentified	unidentified
ff1f806d20f7ee5ba00cb5ca91969420	0	0	0	0	1	0	0	1	0	0	0	0	Bacteria	Proteobacteria	Gammaproteobacteria	Xanthomonadales	Xanthomonadaceae	Lysobacter	unidentified
99f857c4b43bcce4efc88bc8842180cf	0	0	0	0	1	0	1	0	0	0	0	0	Bacteria	Proteobacteria	Alphaproteobacteria	unidentified	unidentified	unidentified	unidentified
2a7003473bb246544d3d8ec6525bdb89	0	0	0	0	1	0	0	0	1	0	0	0	Bacteria	Proteobacteria	unidentified	unidentified	unidentified	unidentified	unidentified
cde9fbc8a5ce8dc97eee55400021cf2a	0	0	0	0	0	1	0	0	1	0	0	0	Bacteria	unidentified	unidentified	unidentified	unidentified	unidentified	unidentified
3db8671da7646d771ac351d3661fa116	0	0	0	0	0	1	0	0	1	0	0	0	Bacteria	Proteobacteria	Gammaproteobacteria	Xanthomonadales	Xanthomonadaceae	Arenimonas	unidentified
cc59a01b2ea168550e0723f82eb0b9e8	0	0	0	0	0	1	0	0	0	0	0	1	Bacteria	Actinobacteriota	Thermoleophilia	Gaiellales	Gaiellaceae	Gaiella	unidentified
4148b8b04d1f3aa7bbee45792b21b923	0	0	0	0	0	1	0	0	1	0	0	0	Bacteria	Proteobacteria	Gammaproteobacteria	Cellvibrionales	Cellvibrionaceae	Cellvibrio	unidentified
fcda5d97049680f39edb63dde6ca9fa6	0	0	0	0	0	0	1	0	0	0	0	1	Bacteria	Proteobacteria	Gammaproteobacteria	Xanthomonadales	Xanthomonadaceae	unidentified	unidentified
52ab8878a4875ba7d75c8ecbdc7296d0	0	0	0	0	0	0	1	0	1	0	0	0	Bacteria	Proteobacteria	Gammaproteobacteria	Burkholderiales	unidentified	unidentified	unidentified
543f7f1a97021c3e7b209f30ca1c421f	0	0	0	0	0	0	1	0	0	0	0	1	Bacteria	unidentified	unidentified	unidentified	unidentified	unidentified	unidentified
9795ace33117e5fb8008a1bf8e196d33	0	0	0	0	0	0	1	0	0	0	0	1	Bacteria	Gemmatimonadota	Gemmatimonadetes	Gemmatimonadales	Gemmatimonadaceae	uncultured	unidentified
25a27fc58e3630c9b673c89c91fe0d32	0	0	0	0	0	0	1	1	0	0	0	0	Bacteria	Proteobacteria	Gammaproteobacteria	Burkholderiales	TRA3-20	TRA3-20	unidentified
da880293d5c89273d7d63648846c32f9	0	0	0	0	0	0	1	0	1	0	0	0	Bacteria	Actinobacteriota	Actinobacteria	Propionibacteriales	Nocardioidaceae	Nocardioides	unidentified
285a3aabb20b43d2a09ab751d8962d8e	0	0	0	0	0	0	1	0	0	0	0	1	Bacteria	Proteobacteria	Gammaproteobacteria	Burkholderiales	Nitrosomonadaceae	MND1	unidentified
726752393700d006e54fa4e99ba73d2d	0	0	0	0	0	0	1	0	0	0	0	1	Bacteria	Proteobacteria	Alphaproteobacteria	unidentified	unidentified	unidentified	unidentified
84ac843e8ea3afcbe1c078732ca9c079	0	0	0	0	0	0	0	0	1	0	0	1	Bacteria	Proteobacteria	Alphaproteobacteria	unidentified	unidentified	unidentified	unidentified
b29e59a67ef7ae3522517cf03647abb2	0	0	0	0	0	0	0	0	1	0	0	1	Bacteria	Actinobacteriota	Thermoleophilia	Gaiellales	Gaiellaceae	Gaiella	unidentified
0851265ce6d02b17b9d6480ca077beea	0	0	0	0	0	0	0	0	0	1	1	0	Bacteria	Proteobacteria	unidentified	unidentified	unidentified	unidentified	unidentified
84e52d1cdacf57d456e549b6cf596701	0	0	0	0	0	0	0	0	0	1	1	0	Bacteria	Proteobacteria	Gammaproteobacteria	Xanthomonadales	Xanthomonadaceae	Lysobacter	uncultured_Xanthomonadaceae
